# Supplementary material for: Comparative genomic analysis of clinically relevant human skin-associated fungi
Source: Research Square preprint supplement (doi:10.21203/rs.3.rs-6700810/v1), 2025-06-11
Supplement: Supplementary file 1 [file f16c4450f3e844a9a04faf7c.xlsx]

## Sheet: Table overview
Overview of tables
Table 1	Overview of genome statistics and strain information
Table 2	Orthofinder orthogroup statistics
Table 3	Predicted GPI-anchor containing orthogroups in samples
Supplementary table 1	Non-secreted orthogroups with protein-targeting enzymatic activity
Supplementary table 2	Non-secreted orthogroups with carbohydrate-targeting enzymatic activity
Supplementary table 3	Non-secreted orthogroups with lipid-targeting enzymatic activity
Supplementary table 4	Adhesin annotated orthogroups without predicted GPI anchors
Supplementary table 5	All predicted secreted orthogroups

## Sheet: Table 1 - Genome overview
Sample number (CBS with -x if multiple of same strain)	Species	Total basepairs	Number of genes	Total gene lengths	GC content (%)	N50	Conc (ng/µL)	Country of origin	Substrate	Main habitat / host	Media	Common dermatological clinical presentation	Genome Accession	Biosample Accession	Bioproject
11945	Candida dubliniensis	14808929	5218	2611550	33.2	28583	Low (0.12)	AUS	Oral sample (patient)	Anthropophilic	SAB C+C	Mucosal infections, especially in immunocompromised patients.	JBOITK000000000	SAMN48434500	PRJNA1260449
2747	Candida dubliniensis	15632721	4787	2295706	33.8	10796	Low (0.12)	NLD	Sputum	Anthropophilic	SAB C+C	Mucosal infections, especially in immunocompromised patients.	JBOITJ000000000	SAMN48434501	PRJNA1260449
8501	Candida dubliniensis	15099732	5156	2567274	33.7	23106	OK (4,2)	NLD	Sputum	Anthropophilic	SAB C+C	Mucosal infections, especially in immunocompromised patients.	JBOBPW000000000	SAMN48434502	PRJNA1260449
11301	Candida parapsilosis	13391427	5295	2683344	39.3	69717	OK (3.36)	Unknown	Unknown	Anthropophilic / Zoophilic	BC-AGAR OPB	Mucosal infections, candidemia, catheter-realted infections, especially in immunocompromised patients, onychomycosis	JBOITI000000000	SAMN48434503	PRJNA1260449
1954	Candida parapsilosis	13053120	5292	2709339	38.7	71356	OK (5.22)	ITA	Olive	Anthropophilic / Zoophilic	BC-AGAR OPB	Mucosal infections, candidemia, catheter-realted infections, especially in immunocompromised patients, onychomycosis	JBOITH000000000	SAMN48434504	PRJNA1260449
94	Candida tropicalis	15287120	6016	2286624	33.6	5066	OK (6.7)	Unknown	Bronchitic patient	Anthropophilic	SAB C+C	Mucosal infections, candidemia, catheter-realted infections, especially in immunocompromised patients.	JBOBPX000000000	SAMN48434499	PRJNA1260449
100148	Epidermophyton floccosum	22197067	7269	3566866	48.6	60000	OK (24.1)	IND	Man, tinea corporis	Anthropophilic	SAB C+C	Tinea corporis, tinea cruris, tinea pedis and onychomycosis.	JBOISM000000000	SAMN48434529	PRJNA1260449
108.67	Epidermophyton floccosum	22521066	7291	3609427	48.5	44430	Low (0.1)	NLD	Man	Anthropophilic	SAB C+C	Tinea corporis, tinea cruris, tinea pedis and onychomycosis.	JBOISL000000000	SAMN48434530	PRJNA1260449
130802	Epidermophyton floccosum	22087452	7457	3695224	48.8	51473	Low (0.2)	IRN	Human	Anthropophilic	SAB C+C	Tinea corporis, tinea cruris, tinea pedis and onychomycosis.	JBOBPR000000000	SAMN48434531	PRJNA1260449
100455	Hortaea werneckii	52583283	14958	7068055	53.3	28279	OK (9.44)	SVN	Sea water	Geophilic	SAB PH 4.0	Tinea nigra.	JBOBPV000000000	SAMN48434509	PRJNA1260449
116.30	Hortaea werneckii	27332186	9645	4651655	52.6	41686	Low (0.24)	Unknown	Unknown	Geophilic	SAB PH 4.0	Tinea nigra.	JBOBPU000000000	SAMN48434510	PRJNA1260449
410.51	Hortaea werneckii	50118831	15418	7410995	53.2	26596	Low (0.2)	JPN	Air	Geophilic	SAB PH 4.0	Tinea nigra.	JBOBPT000000000	SAMN48434511	PRJNA1260449
14140-1	Malassezia furfur	8157392	4538	2074984	64.4	25999	Low (0.22)	FRA	Human, blood, catheter	Anthropophilic / Zoophilic	mDixon	Pityriasis versicolor, seborrhoeic dermatitis, and folliculitis.	JBOBPP000000000	SAMN48434542	PRJNA1260449
14140-2	Malassezia furfur	8248886	4261	2099924	64.6	58016	Low (1.04)	FRA	Human, blood, catheter	Anthropophilic / Zoophilic	mDixon	Pityriasis versicolor, seborrhoeic dermatitis, and folliculitis.	-	-	PRJNA1260449
1878	Malassezia furfur	14223654	7445	3483056	64.2	19052	OK (12.1)	Unknown	Dandruff	Anthropophilic / Zoophilic	mDixon	Pityriasis versicolor, seborrhoeic dermatitis, and folliculitis.	Pending	Pending	PRJNA1260449
6000	Malassezia furfur	14211871	6767	3555106	64.4	46421	OK (12.1)	IND	Dandruff	Anthropophilic / Zoophilic	mDixon	Pityriasis versicolor, seborrhoeic dermatitis, and folliculitis.	Pending	Pending	PRJNA1260449
7705	Malassezia globosa	9083001	3952	2141265	52.1	239120	Low (1.04)	NLD	Skin	Zoophilic / Anthropophilic	MLNA	Pityriasis versicolor, seborrhoeic dermatitis, and folliculitis.	JBOBPO000000000	SAMN48434545	PRJNA1260449
7886	Malassezia globosa	9194681	3706	2074801	52.1	405198	Low (0.1)	CAN	Scalp	Zoophilic / Anthropophilic	MLNA	Pityriasis versicolor, seborrhoeic dermatitis, and folliculitis.	JBOBPN000000000	SAMN48434546	PRJNA1260449
8744	Malassezia globosa	9192729	3702	2078556	52.1	319793	Very low (0.03)	GBR	Unknown	Zoophilic / Anthropophilic	MLNA	Pityriasis versicolor, seborrhoeic dermatitis, and folliculitis.	JBOBPM000000000	SAMN48434547	PRJNA1260449
7877	Malassezia restricta	7319219	3724	1922785	55.7	368168	OK (3.73)	GBR	Unknown	Zoophilic / Anthropophilic	MLNA	Pityriasis versicolor, seborrhoeic dermatitis, and folliculitis.	JBOBPL000000000	SAMN48434548	PRJNA1260449
7991	Malassezia restricta	7644519	3523	1874071	55.2	440491	Very low (0.03)	GBR	Normal skin	Zoophilic / Anthropophilic	MLNA	Pityriasis versicolor, seborrhoeic dermatitis, and folliculitis.	JBOBPK000000000	SAMN48434549	PRJNA1260449
119449	Microsporum audouinii	23450257	8022	3957616	47.6	140810	Low (0.1)	GAB	Tinea Capitis	Anthropophilic	SAB C+C	Tinea capitis , tinea corporis, ectotrix hair infection.	JBOISK000000000	SAMN48434532	PRJNA1260449
332.68	Microsporum audouinii	23224166	8102	3935371	47.6	97991	Very low (0.09)	Unknown	Man	Anthropophilic	SAB C+C	Tinea capitis, tinea corporis, ectotrix hair infection.	JBOISJ000000000	SAMN48434533	PRJNA1260449
113480	Microsporum canis	23086063	8011	3963479	47.6	166237	Low (0.3)	DEU	Head	Zoophilic	SAB C+C	Tinea capitis, ectotrix hair infection.	JBOISI000000000	SAMN48434534	PRJNA1260449
156.69	Microsporum canis	23277049	8051	4055158	47.8	143774	Low ( 0.52)	NLD	Man, skin of face	Zoophilic	SAB C+C	Tinea capitis, ectotrix hair infection.	JBOISH000000000	SAMN48434535	PRJNA1260449
445.51	Microsporum canis	22966333	7889	3597481	47.9	21208	OK (8.87)	JPN	Unknown	Zoophilic	SAB C+C	Tinea capitis, ectotrix hair infection.	JBOISG000000000	SAMN48434536	PRJNA1260449
131111	Microsporum ferrugineum	22855495	8022	3943264	47.6	143079	Low (0.4)	IRN	Unknown	Anthropophilic	SAB C+C	Tinea capitis, ectotrix hair infection.	JBOISF000000000	SAMN48434537	PRJNA1260449
373.71	Microsporum ferrugineum	22833020	8230	4104883	47.7	146883	Low (0.22)	Africa	Man	Anthropophilic	SAB C+C	Tinea capitis, ectotrix hair infection.	JBOISE000000000	SAMN48434538	PRJNA1260449
11311	Nakaseomyces glabratus (prev. Candida glabrata)	14615337	4836	2452963	39.9	52665	OK (5.44)	Unknown	Unknown	Anthropophilic	BC-AGAR OPB	Mucosal infections, candidemia, catheter-realted infections, especially in immunocompromised patients.	JBOITF000000000	SAMN48434506	PRJNA1260449
138	Nakaseomyces glabratus (prev. Candida glabrata)	13051218	4843	2461799	39.5	55657	Low (0.26)	Unknown	Human	Anthropophilic	BC-AGAR OPB	Mucosal infections, candidemia, catheter-realted infections, especially in immunocompromised patients.	JBOITE000000000	SAMN48434507	PRJNA1260449
15698	Nakaseomyces glabratus (prev. Candida glabrata)	12423233	4825	2452240	38.9	78240	OK (5,46)	IRN	blod	Anthropophilic	BC-AGAR OPB	Mucosal infections, candidemia, catheter-realted infections, especially in immunocompromised patients.	JBOITD000000000	SAMN48434508	PRJNA1260449
171.64	Nannizzia gypsea (prev. Microsporum gypseum)	23464309	7524	3872003	48.3	174758	Low (0.4)	AUS	Bushland soil	Geophilic	SAB C+C	Usually produces a single inflammatory skin or scalp lesion	JBOBPS000000000	SAMN48434528	PRJNA1260449
573-1	Pichia kudriavzevii (prev. Candida krusei)	12015782	5014	2360554	38.6	27554	OK (6.72)	LKA	Sputum of bronchitic convict	Geophilic	BC-AGAR OPB	Mucosal infections, candidemia, catheter-realted infections, especially in immunocompromised patients.	JBOITG000000000	SAMN48434505	PRJNA1260449
573-2	Pichia kudriavzevii (prev. Candida krusei)	12160557	4999	2322223	38.5	26337	OK (6.72)	LKA	Sputum of bronchitic convict	Geophilic	BC-AGAR OPB	Mucosal infections, candidemia, catheter-realted infections, especially in immunocompromised patients.	-	-	PRJNA1260449
109405	Trichophyton concentricum	22330479	7511	3708654	48.7	61403	OK (2)	PNG	Chest	Anthropophilic	SAB C+C	Chronic widespread non-inflammatory tinea corporis known as tinea imbricata	JBOITC000000000	SAMN48434512	PRJNA1260449
196.26	Trichophyton concentricum	22697339	7759	3906057	47	33767	OK (14.7)	Unknown	Unknown	Anthropophilic	SAB C+C	Chronic widespread non-inflammatory tinea corporis known as tinea imbricata	JBOITB000000000	SAMN48434513	PRJNA1260449
435.73	Trichophyton mentagrophytes	24086733	7422	3697821	48.5	64053	OK (6.34)	ZAF	Skin & hair, rabbit	Zoophilic	SAB C+C	Tinea corporis, tinea cruris, tinea pedis	JBOITA000000000	SAMN48434514	PRJNA1260449
124404	Trichophyton mentagrophytes	23606881	7539	3808333	48.7	58312	Low (0.17)	ITA	Ear crust, dwarf rabbit	Zoophilic	SAB C+C	Tinea corporis, tinea cruris, tinea pedis	JBOISZ000000000	SAMN48434515	PRJNA1260449
117539	Trichophyton rubrum	21874875	7652	3794657	48.7	21199	OK (7.52)	GRC	Leg onychomycosis	Anthropophilic	SAB C+C	Tinea corporis, tinea cruris, tinea pedis, onychomycosis	JBOISY000000000	SAMN48434516	PRJNA1260449
170.65	Trichophyton rubrum	22783912	7870	3864602	48.2	52110	OK (36.1)	NGA	Skin	Anthropophilic	SAB C+C	Tinea corporis, tinea cruris, tinea pedis, onychomycosis	JBOISX000000000	SAMN48434517	PRJNA1260449
289.86	Trichophyton rubrum	22171097	7498	3761391	48.5	59791	Very low (0.09)	CAN	Buttock	Anthropophilic	SAB C+C	Tinea corporis, tinea cruris, tinea pedis, onychomycosis	JBOISW000000000	SAMN48434518	PRJNA1260449
735.88	Trichophyton rubrum	22239178	7448	3669034	48.3	68085	OK (1.8)	ESP	Skin, chin	Anthropophilic	SAB C+C	Tinea corporis, tinea cruris, tinea pedis, onychomycosis	JBOISV000000000	SAMN48434519	PRJNA1260449
NA	Trichophyton rubrum	23367990	7798	3807867	48.1	25991	OK (8.6)			Anthropophilic	SAB C+C	Tinea corporis, tinea cruris, tinea pedis, onychomycosis	-	-	PRJNA1260449
458.59	Trichophyton schoenleinii	22458346	7414	3787125	48.7	54683	Low (0.13)	NLD	man	Anthropophilic	SAB C+C	Tinea capitis (favus when chronic), tinea corporis, tinea faciei	JBOISU000000000	SAMN48434520	PRJNA1260449
855.71	Trichophyton schoenleinii	23847963	7436	3727755	48.8	75228	Low (0.3)	NLD	Hair	Anthropophilic	SAB C+C	Tinea capitis (favus when chronic), tinea corporis, tinea faciei	JBOIST000000000	SAMN48434521	PRJNA1260449
112188	Trichophyton tonsurans	24556241	7531	3780907	47.3	47080	OK (32.5)	GBR	Horse	Anthropophilic	SAB C+C	Tinea capitis (favus when chronic), tinea corporis, tinea faciei	JBOISS000000000	SAMN48434522	PRJNA1260449
129.35	Trichophyton tonsurans	22792146	7554	3681183	48.4	47520	Low (0.26)	JPN	Man	Anthropophilic	SAB C+C	Tinea capitis, tinea corporis. Endothrix hair infection.	JBOISR000000000	SAMN48434523	PRJNA1260449
729.88	Trichophyton tonsurans	22575963	7522	3693051	48.5	51159	Low (0.1)	FRA	Man	Anthropophilic	SAB C+C	Tinea capitis, tinea corporis. Endothrix hair infection.	JBOISQ000000000	SAMN48434524	PRJNA1260449
120316	Trichophyton violaceum	24573465	7574	3768370	49	78141	OK (21.1)	CHE	Tinea capitis	Anthropophilic	SAB C+C	Tinea capitis, tinea corporis. Endothrix hair infection.	JBOISP000000000	SAMN48434525	PRJNA1260449
517.63	Trichophyton violaceum	22127917	7804	3845593	48.5	73461	Low (0.27)	BDI	Tinea capitis	Anthropophilic	SAB C+C	Tinea capitis, tinea corporis.	JBOISO000000000	SAMN48434526	PRJNA1260449
730.88	Trichophyton violaceum	22669480	7278	3662084	47.9	66193	OK (2.07)	FRA	Man	Anthropophilic	SAB C+C	Tinea capitis, tinea corporis.	JBOISN000000000	SAMN48434527	PRJNA1260449
4098	Trichosporon ovoides	20929194	6995	3292516	61.6	31025	Low (0.18)	ESP	Hair from white piedra case	Geophilic	SAB C+C	Tinea capitis (white piedra), tinea corporis.	Pending	Pending	PRJNA1260449
7612	Trichosporon ovoides	20753548	6656	3199694	61.6	26470	OK (2.7)	Unknown	White piedra	Geophilic	SAB C+C	Tinea capitis (white piedra), tinea corporis.	Pending	Pending	PRJNA1260449
9430	Trichosporon ovoides	40801043	12960	6301150	60.3	30444	OK (13.8)	JPN	House	Geophilic	SAB C+C	Tinea capitis (white piedra), tinea corporis.	JBOBPQ000000000	SAMN48434541	PRJNA1260449

## Sheet: Table 2 - Orthofinder statistic
Statistics	Blastocladiella emersonii 22665	Candida dubliniensis 11945	Candida dubliniensis 2747	Candida dubliniensis 8501	Candida parapsilosis 11301	Candida parapsilosis 1954	Candida tropicalis 94	Epidermophyton floccosum 100148	Epidermophyton floccosum 10867	Epidermophyton floccosum 130802	Hortaea werneckii 100455	Hortaea werneckii 1163	Hortaea werneckii 41051	Malassezia furfur 14140-1	Malassezia furfur 14140-2	Malassezia furfur 1878	Malassezia furfur 6000	Malassezia globosa 7705	Malassezia globosa 7886	Malassezia globosa 8744	Malassezia restricta 7877	Malassezia restricta 7991	Microsporum audouinii 119449	Microsporum audouinii 33268	Microsporum canis 113480	Microsporum canis 15669	Microsporum canis 44551	Microsporum ferrugineum 131111	Microsporum ferrugineum 37371	Nakaseomyces glabratus 11311	Nakaseomyces glabratus 138	Nakaseomyces glabratus 15698	Nannizzia gypsea 17164	Pichia kudriavzevii 573-1	Pichia kudriavzevii 573-2	Radiomyces spectabilis	Trichophyton concentricum 109405	Trichophyton concentricum 19626	Trichophyton mentagrophytes 124404	Trichophyton mentagrophytes 43573	Trichophyton rubrum 117539	Trichophyton rubrum 17065	Trichophyton rubrum 28986	Trichophyton rubrum 73588	Trichophyton rubrum NA	Trichophyton schoenleinii 45859	Trichophyton schoenleinii 85571	Trichophyton tonsurans 112188	Trichophyton tonsurans 12935
Number of genes	10031	5218	4787	5156	5295	5292	6016	7269	7291	7457	14958	9645	15418	4538	4261	7445	6767	3952	3706	3702	3724	3523	8022	8102	8011	8051	7889	8022	8230	4836	4843	4825	7524	5014	4999	10886	7511	7759	7539	7422	7652	7870	7498	7448	7798	7414	7436	7531	7554
Number of genes in orthogroups	8170	5203	4741	5147	5274	5266	5700	7235	7239	7396	14517	9266	15006	4473	4221	7336	6697	3936	3703	3696	3712	3522	8005	8082	7996	7998	7855	8002	8154	4825	4831	4818	7444	4905	4913	9139	7493	7700	7498	7395	7581	7845	7487	7433	7742	7369	7405	7498	7529
Number of unassigned genes	1861	15	46	9	21	26	316	34	52	61	441	379	412	65	40	109	70	16	3	6	12	1	17	20	15	53	34	20	76	11	12	7	80	109	86	1747	18	59	41	27	71	25	11	15	56	45	31	33	25
Percentage of genes in orthogroups	81.4	99.7	99.0	99.8	99.6	99.5	94.7	99.5	99.3	99.2	97.1	96.1	97.3	98.6	99.1	98.5	99.0	99.6	99.9	99.8	99.7	100.0	99.8	99.8	99.8	99.3	99.6	99.8	99.1	99.8	99.8	99.9	98.9	97.8	98.3	84.0	99.8	99.2	99.5	99.6	99.1	99.7	99.9	99.8	99.3	99.4	99.6	99.6	99.7
Percentage of unassigned genes	18.6	0.3	1.0	0.2	0.4	0.5	5.3	0.5	0.7	0.8	2.9	3.9	2.7	1.4	0.9	1.5	1.0	0.4	0.1	0.2	0.3	0.0	0.2	0.2	0.2	0.7	0.4	0.2	0.9	0.2	0.2	0.1	1.1	2.2	1.7	16.0	0.2	0.8	0.5	0.4	0.9	0.3	0.1	0.2	0.7	0.6	0.4	0.4	0.3
Number of orthogroups containing species	4450	4559	4141	4509	4563	4523	4367	6400	6443	6507	7450	7815	7782	3953	3858	4025	3824	3675	3480	3485	3485	3314	6908	6925	6904	6989	6627	6907	6994	4210	4209	4204	6455	4349	4347	5054	6590	6698	6728	6571	6674	6753	6707	6566	6697	6609	6571	6684	6634
Percentage of orthogroups containing species	22.5	23.1	21.0	22.8	23.1	22.9	22.1	32.4	32.6	33.0	37.7	39.6	39.4	20.0	19.5	20.4	19.4	18.6	17.6	17.7	17.7	16.8	35.0	35.1	35.0	35.4	33.6	35.0	35.4	21.3	21.3	21.3	32.7	22.0	22.0	25.6	33.4	33.9	34.1	33.3	33.8	34.2	34.0	33.3	33.9	33.5	33.3	33.9	33.6
Number of species-specific orthogroups	579	141	110	140	195	195	26	64	71	72	2271	2214	2434	287	250	317	230	38	39	40	18	17	44	44	50	43	43	17	17	813	803	813	6	878	875	463	25	25	5	4	13	9	6	2	2	15	15	18	21
Number of genes in species-specific orthogroups	3127	143	113	142	205	208	109	76	86	76	3355	2397	3663	296	257	413	302	40	39	40	25	20	44	44	51	45	43	17	17	846	841	842	14	897	891	1705	25	25	6	4	16	9	6	2	4	15	15	23	22
Percentage of genes in species-specific orthogroups	31.1734	2.74051	2.36056	2.75407	3.87158	3.93046	1.81184	1.04554	1.17954	1.01918	22.4295	24.8523	23.7579	6.5227	6.03145	5.54735	4.46283	1.01215	1.05235	1.0805	0.671321	0.567698	0.548492	0.543076	0.636625	0.558937	0.545063	0.211917	0.206561	17.4938	17.3653	17.4508	0.186071	17.8899	17.8236	15.6623	0.332845	0.322206	0.0795862	0.0538938	0.209096	0.114358	0.0800213	0.0268528	0.0512952	0.20232	0.201721	0.305404	0.291236
Number of sample-specific orthogroups	579	0	0	0	0	0	26	0	1	0	29	17	24	0	0	9	4	1	0	0	1	0	0	0	0	0	0	0	0	0	0	0	6	3	0	463	0	0	1	0	3	0	0	0	2	0	0	2	0
Number of genes in sample-specific orthogroups	3127	0	0	0	0	0	109	0	2	0	59	35	48	0	0	18	8	2	0	0	2	0	0	0	0	0	0	0	0	0	0	0	14	6	0	1705	0	0	2	0	6	0	0	0	4	0	0	6	0
Percentage of genes in sample-specific orthogroups	31.2	0.0	0.0	0.0	0.0	0.0	1.8	0.0	0.0	0.0	0.4	0.4	0.3	0.0	0.0	0.2	0.1	0.1	0.0	0.0	0.1	0.0	0.0	0.0	0.0	0.0	0.0	0.0	0.0	0.0	0.0	0.0	0.2	0.1	0.0	15.7	0.0	0.0	0.0	0.0	0.1	0.0	0.0	0.0	0.1	0.0	0.0	0.1	0.0
[truncated: 7 more columns]

## Sheet: Table 3 - Adhesin distribution
Sample	Unique orthogroups	Total number of genes
Candida dubliniensis 11945	31	37
Candida dubliniensis 2747	27	40
Candida dubliniensis 8501	29	39
Candida parapsilosis 11301	30	40
Candida parapsilosis 1954	30	42
Candida tropicalis 94	29	50
Nakaseomyces glabratus 11311	25	46
Nakaseomyces glabratus 138	23	46
Nakaseomyces glabratus 15698	24	39
Pichia kudriavzevii 573-1	11	12
Pichia kudriavzevii 573-2	9	10
Malassezia furfur 14140-1	6	10
Malassezia furfur 14140-2	4	7
Malassezia furfur 1878	7	16
Malassezia furfur 6000	7	16
Malassezia globosa 7705	5	6
Malassezia globosa 7886	3	3
Malassezia globosa 8744	5	5
Malassezia restricta 7877	3	4
Malassezia restricta 7991	5	6
Hortaea werneckii 100455	45	75
Hortaea werneckii 1163	46	52
Hortaea werneckii 41051	50	80
Epidermophyton floccosum 100148	26	27
Epidermophyton floccosum 10867	25	26
Epidermophyton floccosum 130802	26	29
Microsporum audouinii 119449	27	29
Microsporum audouinii 33268	25	26
Microsporum canis 113480	25	27
Microsporum canis 15669	26	27
Microsporum canis 44551	24	25
Microsporum ferrugineum 131111	27	31
Microsporum ferrugineum 37371	27	30
Nannizzia gypsea 17164	27	31
Trichophyton concentricum 109405	25	26
Trichophyton concentricum 19626	24	25
Trichophyton mentagrophytes 124404	25	26
Trichophyton menthagrophytes 43573	26	27
Trichophyton rubrum 117539	27	29
Trichophyton rubrum 17065	25	27
Trichophyton rubrum 28986	24	25
Trichophyton rubrum 73588	24	26
Trichophyton rubrum NA	24	27
Trichophyton schoenleinii 45859	26	27
Trichophyton schoenleinii 85571	26	28
Trichophyton tonsurans 112188	25	26
Trichophyton tonsurans 12935	25	27
Trichophyton tonsurans 72988	24	26
Trichophyton violaceum 120316	25	26
Trichophyton violaceum 51763	26	27
Trichophyton violaceum 73088	24	25
Trichosporon ovoides 4098	39	41
Trichosporon ovoides 7612	39	41
Trichosporon ovoides 9430	42	76
Total	1284	1597

## Sheet: Supplementary table 1 - All sec
Description	Short description	Orthogroup	PFAMs	Candida dubliniensis	Candida parapsilosis	Candida tropicalis	Epidermophyton floccosum	Hortaea werneckii	Malassezia furfur	Malassezia globosa	Malassezia restricta	Microsporum audouinii	Microsporum canis	Microsporum ferrugineum	Nakaseomyces glabratus	Nannizzia gypsea	Pichia kudriavzevii	Trichophyton concentricum	Trichophyton mentagrophytes	Trichophyton rubrum	Trichophyton schoenleinii	Trichophyton tonsurans	Trichophyton violaceum	Trichosporon ovoides	Total genec
2'-5' RNA ligase superfamily	2'-5' RNA ligase superfamily	OG0010072	2_5_RNA_ligase2	0	0	0	0	0	2	1	0	0	0	0	0	0	0	0	0	0	0	0	0	0	3
60S ribosomal protein L8	60S ribosomal protein L8	OG0000719	Ribosomal_L7Ae	2	2	1	1	2	2	1	1	1	1	1	1	1	2	1	1	1	1	1	1	2	28
Acid protease	Aspartyl protease	OG0013055	Asp	0	0	0	0	0	0	0	0	0	0	0	0	0	0	0	0	0	0	0	0	2	2
Acyl-CoA dehydrogenase, C-terminal domain	Acyl-CoA dehydrogenase	OG0002828	Acyl-CoA_dh_1,Acyl-CoA_dh_M,Acyl-CoA_dh_N	0	0	0	1	2	2	1	1	1	1	1	0	1	0	1	1	1	1	1	1	2	20
Agglutinin-like protein	Agglutinin-like protein	OG0006286	Candida_ALS,Candida_ALS_N	5	3	8	0	0	0	0	0	0	0	0	0	0	0	0	0	0	0	0	0	0	16
Alanine dehydrogenase/PNT, C-terminal domain	Alanine dehydrogenase/PNT	OG0007510	ADH_N,ADH_zinc_N	0	0	0	0	2	0	0	0	0	0	0	0	0	0	0	0	0	0	0	0	1	3
Aldo/keto reductase family	Aldo/keto reductase family	OG0009039	Aldo_ket_red	0	0	0	0	2	0	0	0	0	0	0	1	0	0	0	0	0	0	0	0	0	3
Aldose 1-epimerase	Aldose 1-epimerase	OG0003622	Aldose_epim	0	0	0	1	4	0	0	0	1	1	1	0	1	0	1	1	1	1	1	1	2	18
Alginate lyase	Alginate lyase	OG0008847, OG0012599, OG0012636	Alginate_lyase, NA, NA	0	0	0	0	0	0	0	0	0	0	0	0	0	0	0	0	0	0	0	0	8	8
Alkaline phosphatase	Alkaline phosphatase	OG0004049	Alk_phosphatase	0	0	0	1	2	0	0	0	1	1	1	0	1	0	1	1	1	1	1	1	1	15
Alpha galactosidase A	Glycoside hydrolase	OG0006730	Melibiase_2	0	0	0	0	7	0	0	0	0	0	0	0	0	0	0	0	0	0	0	0	1	8
Alpha-N-acetylglucosaminidase (NAGLU) C-terminal domain	NAGLU C-terminal domain	OG0009827	NAGLU,NAGLU_C,NAGLU_N	0	0	0	0	1	0	0	0	0	0	0	0	0	0	0	0	0	0	0	0	2	3
Alpha-acetolactate decarboxylase	Alpha-acetolactate decarboxylase	OG0012629	AAL_decarboxy	0	0	0	0	0	0	0	0	0	0	0	0	0	0	0	0	0	0	0	0	2	2
Alpha/beta hydrolase family	Lipase	OG0004547, OG0004816, OG0006490, OG0011979	Abhydrolase_6, Abhydrolase_1,Abhydrolase_6, PAF-AH_p_II, Abhydrolase_6,Hydrolase_4,LIP	0	0	0	2	8	0	0	0	2	3	2	0	4	0	3	3	3	3	3	3	0	42
Amb_all	Pectin lyase	OG0008054, OG0010567	Pec_lyase_C, Pec_lyase_C	0	0	0	0	6	0	0	0	0	0	0	0	0	0	0	0	0	0	0	0	0	6
Amidase	Amidase	OG0003093, OG0004951	Amidase, Amidase	0	0	0	2	8	0	0	0	3	4	3	0	1	0	3	2	2	3	2	2	0	37
Amidohydrolase family	Amidase	OG0012167	Amidohydro_1	0	0	0	0	2	0	0	0	0	0	0	0	0	0	0	0	0	0	0	0	0	2
Aminotransferase class I and II	Aminotransferase class I and II	OG0000618	Aminotran_1_2	1	0	1	2	3	0	0	0	2	2	2	0	2	0	2	2	2	3	2	2	1	31
Ancestral locus Anc_6.367	Ancestral locus Anc_6.367	OG0015334	Flocculin_t3	0	0	0	0	0	0	0	0	0	0	0	1	0	0	0	0	0	0	0	0	0	1
Apc15p protein	Apc15p protein	OG0005535	Apc15p	0	0	0	1	0	0	0	0	1	1	1	0	1	0	1	1	1	2	1	1	0	13
AraC-like ligand binding domain	AraC-like ligand binding domain	OG0017241	Cupin_2	0	0	0	0	1	0	0	0	0	0	0	0	0	0	0	0	0	0	0	0	0	1
Arabinogalactan endo-beta-1,4-galactanase	Glycoside hydrolase	OG0010809	Glyco_hydro_53	0	0	0	0	2	0	0	0	0	0	0	0	0	0	0	0	0	0	0	0	0	2
Arthropod defensin	Arthropod defensin	OG0006537, OG0011067	Defensin_2, Defensin_2	0	0	0	1	0	0	0	0	2	2	2	0	0	0	1	1	1	1	1	1	0	15
Arylsulfotransferase (ASST)	Arylsulfotransferase (ASST)	OG0010821, OG0012591	Arylsulfotran_2, Arylsulfotran_2	0	0	0	0	2	0	0	0	0	0	0	0	0	0	0	0	0	0	0	1	2	5
BNR repeat-like domain	BNR repeat-like domain	OG0005736	BNR_2	0	0	0	1	0	0	0	0	1	1	1	0	1	0	1	1	1	1	1	1	0	12
Belongs to the FAD-dependent glycerol-3-phosphate dehydrogenase family	Glycerol-3-phosphate dehydrogenase	OG0001759	DAO,DAO_C,EF-hand_7	1	1	1	1	2	2	1	1	1	1	1	1	1	0	1	1	1	1	1	1	2	24
Belongs to the GMC oxidoreductase family	GMC oxidoreductase family	OG0003169, OG0011876	GMC_oxred_C,GMC_oxred_N, ACT_7,CBM_1,CDH-cyt,GMC_oxred_C,GMC_oxred_N	0	0	0	1	4	2	1	1	1	1	1	0	1	0	1	1	1	1	1	1	2	22
Belongs to the RNase T2 family	Rnase	OG0000661	Ribonuclease_T2	3	2	4	1	4	1	1	1	1	1	2	1	1	1	1	1	1	1	1	1	2	33
Belongs to the TCTP family	TCTP family	OG0019392	TCTP	0	0	0	0	0	0	0	0	0	0	0	0	0	0	0	0	1	0	0	1	0	2
Belongs to the actin-binding proteins ADF family	Actin-binding proteins ADF family	OG0003643	Cofilin_ADF	0	0	1	1	2	2	1	0	1	1	1	0	1	0	1	1	1	1	1	1	1	18
Belongs to the arginase family	Arginase family	OG0000765	Arginase	3	6	3	1	2	0	0	0	2	1	2	1	2	1	1	1	1	1	1	2	1	33
Belongs to the class I-like SAM-binding methyltransferase superfamily. rRNA adenine N(6)-methyltransferase family	Class I-like SAM-binding methyltransferase	OG0005855	RrnaAD	0	0	0	1	0	0	0	0	1	1	1	0	1	0	1	1	1	1	1	1	0	12
Belongs to the glycosyl hydrolase 1 family	Glycoside hydrolase	OG0014071	Glyco_hydro_1	0	0	0	0	1	0	0	0	0	0	0	0	0	0	0	0	0	0	0	0	0	1
Belongs to the glycosyl hydrolase 11 (cellulase G) family	Cellulase	OG0011597, OG0011826	CBM_1,Glyco_hydro_11, Glyco_hydro_11	0	0	0	0	4	0	0	0	0	0	0	0	0	0	0	0	0	0	0	0	0	4
Belongs to the glycosyl hydrolase 12 (cellulase H) family	Cellulase	OG0008669	Glyco_hydro_12	0	0	0	0	4	0	0	0	0	0	0	0	0	0	0	0	0	0	0	0	0	4
Belongs to the glycosyl hydrolase 18 family	Glycoside hydrolase	OG0000123, OG0004984, OG0005965, OG0015889	Glyco_hydro_18, CBM_19,Flocculin_t3,Glyco_hydro_18, Glyco_hydro_18, Glyco_hydro_18	1	1	1	5	4	2	1	1	5	5	5	1	5	1	5	5	6	5	6	5	3	78
Belongs to the glycosyl hydrolase 2 family	Glycoside hydrolase	OG0012053	Glyco_hydro_2,Glyco_hydro_2_C,Glyco_hydro_2_N	0	0	0	0	2	0	0	0	0	0	0	0	0	0	0	0	0	0	0	0	0	2
Belongs to the glycosyl hydrolase 28 family	Glycoside hydrolase	OG0010634, OG0010649, OG0014126	Glyco_hydro_28, Glyco_hydro_28, Glyco_hydro_28	0	0	0	0	6	0	0	0	0	0	0	0	0	0	0	0	0	0	0	0	0	6
Belongs to the glycosyl hydrolase 3 family	Glycoside hydrolase	OG0017473	Fn3-like,Glyco_hydro_3,Glyco_hydro_3_C	0	0	0	0	1	0	0	0	0	0	0	0	0	0	0	0	0	0	0	0	0	1
Belongs to the glycosyl hydrolase 30 family	Glycoside hydrolase	OG0010380, OG0010453, OG0010647	Glyco_hydr_30_2,Glyco_hydro_30,Glyco_hydro_30C, Glyco_hydro_30,Glyco_hydro_30C, Glyco_hydr_30_2,Glyco_hydro_30,Glyco_hydro_30C	0	0	0	0	6	0	0	0	0	0	0	0	0	0	0	0	0	0	0	0	0	6
Belongs to the glycosyl hydrolase 31 family	Glycoside hydrolase	OG0001219, OG0002574, OG0011691, OG0017467	DUF5110,Gal_mutarotas_2,Glyco_hydro_31, CBM_20,Gal_mutarotas_2,Glyco_hydro_31,NtCtMGAM_N, Glyco_hydro_31, Gal_mutarotas_2,Glyco_hydro_31,NtCtMGAM_N	3	1	3	2	11	3	1	1	2	2	3	1	2	1	2	2	2	2	2	2	3	53
Belongs to the glycosyl hydrolase 32 family	Glycoside hydrolase	OG0010746	Glyco_hydro_32C,Glyco_hydro_32N	0	0	0	0	2	0	0	0	0	0	0	0	0	0	0	0	0	0	0	0	0	2
Belongs to the glycosyl hydrolase 43 family	Glycoside hydrolase	OG0010385, OG0010494, OG0010692, OG0011604, OG0012021, OG0012088, OG0014326, OG0017641	CBM_1,Glyco_hydro_43, Glyco_hydro_43, Glyco_hydro_43, Glyco_hydro_43, Glyco_hydro_43, Glyco_hydro_43, Glyco_hydro_43, AbfB,Glyco_hydro_43	0	0	0	0	14	0	0	0	0	0	0	0	0	0	0	0	0	0	0	0	0	14
Belongs to the glycosyl hydrolase 47 family	Glycoside hydrolase	OG0004051	Glyco_hydro_47	0	0	0	1	3	0	0	0	1	1	1	0	1	0	1	1	1	1	1	1	0	15
Belongs to the glycosyl hydrolase 5 (cellulase A) family	Cellulase	OG0008616, OG0009792, OG0010479, OG0010802, OG0012054, OG0013097, OG0014369	Cellulase,Ricin_B_lectin, Cellulase, Cellulase, Cellulase, Cellulase, Cellulase, CBM_1,Cellulase	0	0	1	0	11	0	0	0	0	0	1	0	0	0	0	0	0	0	0	0	3	16
Belongs to the glycosyl hydrolase 7 (cellulase C) family	Cellulase	OG0009028, OG0010444, OG0017407	CBM_1,Glyco_hydro_7, CBM_1,Glyco_hydro_7, CBM_1,Glyco_hydro_7	0	0	0	0	6	0	0	0	0	0	0	0	0	0	0	0	0	0	0	0	0	6
Belongs to the heat shock protein 70 family	Heat shock associated	OG0001707	HSP70	1	1	0	1	2	2	1	1	1	1	1	1	1	2	2	1	1	1	1	1	2	26
Belongs to the multicopper oxidase family	Multicopper oxidase	OG0009004, OG0012565	Cu-oxidase,Cu-oxidase_2,Cu-oxidase_3, Cu-oxidase,Cu-oxidase_2,Cu-oxidase_3	0	0	0	1	0	0	0	0	0	0	0	0	0	0	1	1	1	2	2	1	0	9
Belongs to the oxygen-dependent FAD-linked oxidoreductase family	Oxygen-dependent oxidoreductase	OG0005346, OG0005599, OG0006990, OG0008046	BBE,FAD_binding_4, BBE,FAD_binding_4, BBE,FAD_binding_4, BBE,FAD_binding_4	0	0	0	3	7	0	0	0	3	3	3	0	4	0	2	2	2	2	2	3	0	38
Belongs to the peptidase A1 family	Aspartyl protease	OG0005456, OG0011479, OG0013878, OG0015601	Asp, Asp, Asp, Asp	1	2	1	1	0	0	0	0	1	1	1	0	1	1	1	1	1	1	1	1	0	18
Belongs to the peptidase M28 family	Metalloprotease M28	OG0003317, OG0005702	PA,Peptidase_M28, Peptidase_M28	1	1	1	2	2	0	0	0	2	2	2	1	2	1	2	2	2	2	2	2	0	31
Belongs to the peptidase S10 family	Serine protease S10	OG0005793, OG0006069, OG0008471, OG0010480	Peptidase_S10, Peptidase_S10, Carbpep_Y_N,Peptidase_S10, Peptidase_S10	0	0	0	2	2	0	0	0	2	2	2	0	2	0	2	2	3	2	2	3	0	30
Belongs to the peptidase S8 family	Serine protease S8	OG0006943, OG0006977, OG0012191, OG0014983	PA,Peptidase_S8,fn3_5, Inhibitor_I9,Peptidase_S8, Peptidase_S8, Inhibitor_I9,Peptidase_S8	2	2	2	0	4	0	0	0	0	0	0	2	0	1	0	0	0	0	0	0	0	13
Belongs to the peroxidase family	Peroxidase family	OG0003964	WSC,peroxidase	0	0	0	1	1	0	0	0	2	2	2	0	1	0	1	1	1	1	2	1	3	20
Belongs to the tannase family	Tannase family	OG0005010, OG0008307, OG0012025, OG0014539	Tannase, Tannase, Tannase, Tannase	0	0	0	1	10	0	0	0	1	1	1	0	1	0	1	1	1	1	1	1	0	22
Belongs to the type-B carboxylesterase lipase family	Lipase	OG0000326, OG0000363, OG0005222, OG0008049, OG0014047	COesterase, COesterase, COesterase, COesterase, COesterase	0	0	0	4	24	1	1	1	5	6	5	0	5	0	5	5	7	5	7	6	0	92
Beta-galactosidase trimerisation domain	Glycoside hydrolase	OG0010943	Glyco_hydro_42,Glyco_hydro_42M	0	0	0	0	2	0	0	0	0	0	0	0	0	0	0	0	0	0	0	0	0	2
Beta-galactosidase, domain 2	Glycoside hydrolase	OG0011822	BetaGal_dom2,BetaGal_dom3,BetaGal_dom4_5,Glyco_hydro_35	0	0	0	0	2	0	0	0	0	0	0	0	0	0	0	0	0	0	0	0	0	2
Beta-glucosidase (SUN family)	Glycoside hydrolase	OG0001723	SUN	2	2	2	1	2	0	0	0	1	1	1	4	1	2	1	1	1	1	1	1	0	26
Beta-lactamase	Beta-lactamase	OG0006589	Beta-lactamase	0	0	0	1	0	0	0	0	0	0	0	0	1	0	1	1	1	1	1	1	0	9
Beta-xylanase	Glycoside hydrolase	OG0010563, OG0011631	CBM_1,Glyco_hydro_10, CBM_1,Glyco_hydro_10	0	0	0	0	4	0	0	0	0	0	0	0	0	0	0	0	0	0	0	0	0	4
CBM1-GH10. carbohydrate-binding module family 1	Glycoside hydrolase	OG0010766	CBM_1,Glyco_hydro_10	0	0	0	0	2	0	0	0	0	0	0	0	0	0	0	0	0	0	0	0	0	2
CFEM domain	CFEM domain	OG0006138, OG0014120, OG0017694, OG0019568	CFEM, CFEM, CFEM, CFEM	0	0	0	1	2	0	0	0	1	1	1	0	1	0	1	1	1	1	1	1	1	15
CHRD domain	CHRD domain	OG0014003, OG0017306	CHRD, CHRD	0	0	0	0	2	0	0	0	0	0	0	0	0	0	0	0	0	0	0	0	0	2
CNH domain	CNH domain	OG0007375	CNH,Vps39_1,Vps39_2	0	0	0	0	0	2	1	1	0	0	0	0	0	0	0	0	0	0	0	0	1	5
Calcineurin-like phosphoesterase	Calcineurin-like phosphoesterase	OG0012174	Metallophos	0	0	0	0	2	0	0	0	0	0	0	0	0	0	0	0	0	0	0	0	0	2
Carbamoyl-phosphate synthetase large chain, oligomerisation domain	Carbamoyl-phosphate synthetase	OG0017314	CPSase_L_D2,CPSase_L_D3	0	0	0	0	1	0	0	0	0	0	0	0	0	0	0	0	0	0	0	0	0	1
Carbohydrate esterase family 12 protein	Lipase GDSL	OG0014131, OG0017460	CBM_1,Lipase_GDSL_2, Lipase_GDSL_2	0	0	0	0	2	0	0	0	0	0	0	0	0	0	0	0	0	0	0	0	0	2
Carbohydrate esterase family 16 protein	Lipase GDSL	OG0008052, OG0012022	Lipase_GDSL, Lipase_GDSL	0	0	0	0	5	0	0	0	0	0	0	0	0	0	0	0	0	0	0	0	0	5
Carbohydrate esterase family 5 protein	Cutinase	OG0010599	Cutinase	0	0	0	0	2	0	0	0	0	0	0	0	0	0	0	0	0	0	0	0	0	2
Carbohydrate esterase family 8 protein	Pectinesterase	OG0017191	Pectinesterase	0	0	0	0	1	0	0	0	0	0	0	0	0	0	0	0	0	0	0	0	0	1
Carbohydrate-binding module family 63 protein	Carbohydrate-binding module family 63 protein	OG0008045	DPBB_1,Pollen_allerg_1	0	0	0	0	4	0	0	0	0	0	0	0	0	0	0	0	0	0	0	0	0	4
Carboxylesterase family	Carboxylesterase family	OG0000248, OG0006337, OG0011239, OG0014750	COesterase, COesterase, COesterase, COesterase	0	0	0	2	7	0	0	0	4	4	3	0	3	0	3	3	3	3	3	3	14	58
Catalyzes the NADPH-dependent reduction of trans-2-enoyl thioesters in mitochondrial fatty acid synthesis (fatty acid synthesis type II). Fatty acid chain elongation in mitochondria uses acyl carrier protein (ACP) as an acyl group carrier, but the enzyme accepts both ACP and CoA thioesters as substrates in vitro. Required for respiration and the maintenance of the mitochondrial compartment	Enoyl-[acyl-carrier-protein] reductase	OG0010264	ADH_zinc_N	1	1	0	0	0	0	0	0	0	0	0	0	0	0	0	0	0	0	0	0	0	2
Catalyzes the hydrolysis of sphingomyelin. Sphingomyelinases D are produced by some spider in their venoms, but also by arthropods such as ticks, or pathogenic bacteria and fungi. They might play a role in pathogenicity through different mechanisms, such as membrane destabilization and host cell penetration, but also pulmonary inflammation and cutaneous lesions	Sphingomyelin associated	OG0006583	NA	0	0	0	1	0	0	0	0	0	0	0	0	0	0	1	1	1	2	1	1	0	9
Catalyzes the transfer of endogenously produced octanoic acid from octanoyl-acyl-carrier-protein onto the lipoyl domains of lipoate-dependent enzymes. Lipoyl-ACP can also act as a substrate although octanoyl-ACP is likely to be the physiological substrate	Lipase	OG0002867	BPL_LplA_LipB	1	1	1	1	2	0	1	0	1	1	1	1	1	1	1	1	1	1	1	1	2	22
Cell-wall agglutinin N-terminal ligand-sugar binding	Agglutinin-like protein	OG0017106	Candida_ALS,Candida_ALS_N	0	0	2	0	0	0	0	0	0	0	0	0	0	0	0	0	0	0	0	0	0	2
Cellulase (glycosyl hydrolase family 5)	Cellulase	OG0006544	CBM_1,Cellulase	0	0	0	0	8	0	0	0	0	0	0	0	0	0	0	0	0	0	0	0	2	10
Cellulose-growth-specific protein	Glycoside hydrolase	OG0014392	Glyco_hydro_61	0	0	0	0	1	0	0	0	0	0	0	0	0	0	0	0	0	0	0	0	0	1
Chitin binding domain	Chitin binding / recognition	OG0009302, OG0015597	Chitin_bind_1,Polysacc_deac_1, Chitin_bind_1,Glyco_hydro_18	0	0	0	0	0	0	0	0	0	0	0	0	1	0	0	1	0	1	0	0	0	3
Chitin recognition protein	Chitin binding / recognition	OG0000250, OG0006594, OG0015690	Chitin_bind_1,Glyco_hydro_18,LysM, Chitin_bind_1,Glyco_hydro_18,LysM, Chitin_bind_1,Glyco_hydro_18,LysM	1	1	0	3	4	2	1	1	2	2	3	1	5	1	4	2	5	3	2	3	2	51
Chitin-binding domain type 2	Chitin binding / recognition	OG0014772	CBM_14	0	0	0	0	0	0	0	0	1	0	1	0	0	0	0	0	0	0	0	0	0	2
Chitosanase catalyzing the endo-type cleavage of chitosan, the deacylated form of chitin. Chitosanase may be crucial in the degradation of the deacetylated portion of chitin in the fungal cell wall	Chitosanase	OG0003778	Glyco_hydro_75	0	0	0	1	0	0	0	0	1	1	1	0	2	0	2	2	2	2	2	2	0	20
CobW domain protein	CobW domain protein	OG0011915	CobW_C,HIT,cobW	0	0	0	0	2	0	0	0	0	0	0	0	0	0	0	0	0	0	0	0	0	2
Common central domain of tyrosinase	Common central domain of tyrosinase	OG0005561	Gal-bind_lectin,Tyrosinase	0	0	0	0	9	0	0	0	0	0	0	0	0	0	0	0	0	0	0	0	0	9
Component of the MICOS complex, a large protein complex of the mitochondrial inner membrane that plays crucial roles in the maintenance of crista junctions, inner membrane architecture, and formation of contact sites to the outer membrane	Component of the MICOS complex	OG0008954	AIM5	1	1	1	0	0	0	0	0	0	0	0	0	0	1	0	0	0	0	0	0	0	4
Component of the cytosolic iron-sulfur (Fe-S) protein assembly (CIA) machinery. Required for the maturation of extramitochondrial Fe-S proteins. Part of an electron transfer chain functioning in an early step of cytosolic Fe-S biogenesis. Electrons are transferred to the Fe-S cluster from NADPH via the FAD- and FMN-containing protein TAH18. Has anti-apoptotic effects in the cell. Involved in nega…	Cytosolic iron-sulfur (Fe-S) protein assembly (CIA) machinery	OG0001937	CIAPIN1,DRE2_N	1	1	1	1	2	2	1	1	1	1	1	1	1	1	1	1	1	1	1	1	2	25
Conserved region in glutamate synthase	Conserved region in glutamate synthase	OG0016014	FMN_dh	0	0	0	0	0	0	0	0	0	0	0	0	0	0	0	0	0	0	0	0	2	2
Cupin	Cupin	OG0000835, OG0014256	Cupin_1, Cupin_1	0	0	0	2	3	0	0	0	2	2	2	0	2	0	2	2	2	2	2	2	2	29
Cutinase	Cutinase	OG0005201, OG0011860	Cutinase, Cutinase	0	0	0	1	4	0	0	0	1	1	1	0	1	0	1	1	1	1	1	1	0	16
Cysteine desulfurase	Cysteine desulfurase	OG0005581	Aminotran_5	0	0	0	1	0	0	0	0	1	1	1	0	1	0	1	1	1	1	1	1	0	12
Cysteine proteinase	Cysteine protease	OG0007541	UCH	0	0	0	0	0	2	1	1	0	0	0	0	0	0	0	0	0	0	0	0	0	4
Cysteine-rich secreted protein	Cysteine-rich secreted protein	OG0005441	NA	0	0	0	1	0	0	0	0	1	2	1	0	1	0	1	1	1	1	1	1	0	13
Cytosolic domain of 10TM putative phosphate transporter	Putative phosphate transporter	OG0017957	PHM7_cyt,RSN1_7TM,RSN1_TM	0	0	0	0	0	1	0	0	0	0	0	0	0	0	0	0	0	0	0	0	0	1
DnaJ central domain	Heat shock associated	OG0002298	DnaJ,DnaJ_C,DnaJ_CXXCXGXG	1	1	1	1	2	1	1	1	1	1	1	1	1	1	1	1	1	1	1	1	2	24
DnaJ molecular chaperone homology domain	Heat shock associated	OG0001972	DnaJ,TPR_16,TPR_19,TPR_8	1	1	1	1	2	2	1	1	1	1	1	0	1	1	1	1	1	1	1	2	3	26
Domain of unknown function (DUF3844)	Domain of unknown function	OG0003813	DUF3844	1	1	1	1	2	0	0	0	1	1	1	0	1	1	1	1	1	1	1	1	0	18
Domain of unknown function (DUF4185)	Domain of unknown function	OG0017272	DUF4185	0	0	0	0	1	0	0	0	0	0	0	0	0	0	0	0	0	0	0	0	0	1
Domain of unknown function (DUF5127)	Domain of unknown function	OG0011603, OG0011714	DUF1793,DUF4964,DUF4965,DUF5127, DUF1793,DUF4964,DUF4965,DUF5127	0	0	0	0	4	0	0	0	0	0	0	0	0	0	0	0	0	0	0	0	0	4
Endo-1,4-beta-xylanase involved in the hydrolysis of xylan, a major structural heterogeneous polysaccharide found in plant biomass representing the second most abundant polysaccharide in the biosphere, after cellulose	Glycoside hydrolase	OG0010646	Glyco_hydro_11	0	0	0	0	2	0	0	0	0	0	0	0	0	0	0	0	0	0	0	0	0	2
Endonuclease/Exonuclease/phosphatase family	Endonuclease/Exonuclease/phosphatase family	OG0010604	Exo_endo_phos	0	0	0	0	2	0	0	0	0	0	0	0	0	0	0	0	0	0	0	0	0	2
Endoplasmic Reticulum Oxidoreductin 1 (ERO1)	Endoplasmic Reticulum Oxidoreductin 1 (ERO1)	OG0001210	ERO1	1	1	1	1	2	2	1	1	1	1	1	1	1	1	1	1	1	1	1	1	2	25
Esterase-like activity of phytase	Phytase	OG0002584	Phytase-like	0	0	0	2	2	0	0	0	2	2	2	0	2	0	2	2	2	2	2	2	0	25
Eukaryotic aspartyl protease	Aspartyl protease	OG0000184, OG0012686, OG0014713, OG0019054	Asp, Asp, Asp, Asp	0	0	0	1	6	4	1	0	3	3	3	0	3	0	3	3	3	3	3	3	2	47
Eukaryotic-type carbonic anhydrase	Eukaryotic-type carbonic anhydrase	OG0001819	Carb_anhydrase	0	0	0	2	0	0	0	0	2	2	2	0	2	0	2	3	2	2	3	2	0	26
Expressed protein	Lipase GDSL	OG0008224	Lipase_GDSL	0	0	0	0	0	0	0	0	0	0	0	0	0	0	0	0	0	0	0	0	2	2
Extracellular matrix protein	Extracellular matrix protein	OG0004448	GPI-anchored	0	0	0	1	2	0	0	0	1	1	1	0	1	0	1	1	1	1	1	1	0	14
Extracellular metalloprotease that contributes to pathogenicity	Metalloprotease M14	OG0001061	Peptidase_M14,Propep_M14	0	0	0	2	2	0	0	0	2	2	2	0	2	0	2	2	2	2	2	2	0	25
Extracellular serine carboxypeptidase that contributes to pathogenicity	Serine protease S10	OG0000534	Peptidase_S10	0	0	0	2	4	2	0	0	2	2	2	0	2	0	2	2	2	2	2	2	0	30
Extracellular serine-threonine rich protein	Extracellular serine-threonine rich protein	OG0011616	CFEM	0	0	0	0	2	0	0	0	0	0	0	0	0	0	0	0	0	0	0	0	0	2
FAD binding domain	FAD binding domain	OG0004489, OG0005956, OG0006930, OG0007342, OG0010353	FAD_binding_4, FAD_binding_4, FAD_binding_4, FAD_binding_4, FAD_binding_4	0	0	0	3	4	0	0	0	2	2	3	0	3	0	4	4	3	4	5	3	0	43
FAD-dependent monooxygenase required for the C5-ring hydroxylation during ubiquinone biosynthesis. Catalyzes the hydroxylation of 3-polyprenyl-4-hydroxybenzoic acid to 3- polyprenyl-4,5-dihydroxybenzoic acid. The electrons required for the hydroxylation reaction may be funneled indirectly from NADPH via a ferredoxin ferredoxin reductase system to COQ6	FAD-dependent monooxygenase	OG0001586	FAD_binding_3	1	1	1	1	1	3	1	1	1	1	1	1	1	1	1	1	1	1	1	1	2	25
Ferredoxin-fold anticodon binding domain	Ferredoxin-fold anticodon binding domain	OG0001406	FDX-ACB,tRNA-synt_2d	1	1	1	1	2	2	1	1	1	1	1	1	1	2	1	1	1	1	1	1	2	26
Ferritin-like domain	Ferritin-like domain	OG0004660, OG0005435, OG0010865, OG0012173	Ferritin_2, Ferritin_2, Ferritin_2, Ferritin_2	0	0	0	3	6	0	0	0	2	2	2	0	2	0	2	2	2	2	3	2	0	32
Fibronectin type III domain	Lipase GDSL	OG0000535	Lipase_GDSL_2,fn3	0	0	0	2	1	0	0	0	3	3	3	0	4	0	3	2	2	3	2	2	0	32
Flo11	Flocculin	OG0008597, OG0013796	Cyt-b5,Flocculin_t3, Cyt-b5,Flocculin_t3	3	1	2	0	0	0	0	0	0	0	0	0	0	0	0	0	0	0	0	0	0	6
Flocculin type 3 repeat	Flocculin	OG0007665, OG0010239, OG0017072, OG0018263	Flocculin_t3, Flocculin_t3, Flocculin_t3, Flocculin_t3	2	3	6	0	0	0	0	0	0	0	0	0	0	2	0	0	0	0	0	0	0	13
Four repeated domains in the Fasciclin I family of proteins, present in many other contexts.	Fasciclin I family	OG0012709, OG0012888	Fasciclin, Fasciclin	0	0	0	0	0	0	0	0	0	0	0	0	0	0	0	0	0	0	0	0	4	4
Fructosamine kinase	Fructosamine kinase	OG0006921	Fructosamin_kin	0	0	0	0	0	0	0	0	0	0	0	0	1	0	1	1	1	1	1	1	0	7
Functions as a sorting receptor in the Golgi compartment required for the intracellular sorting and delivery of soluble vacuolar proteins, like carboxypeptidase Y (CPY) and proteinase A	Sorting receptor in the Golgi compartment	OG0015488	Sortilin-Vps10,Sortilin_C	0	0	0	0	0	0	0	0	0	0	0	1	0	0	0	0	0	0	0	0	0	1
Fungal fucose-specific lectin	Fungal fucose-specific lectin	OG0005805	Fungal_lectin	0	0	0	1	0	0	0	0	1	1	1	0	1	0	1	1	1	1	1	1	0	12
Fungal specific transcription factor domain	Fungal specific transcription factor domain	OG0004373	Fungal_trans,Zn_clus	0	0	0	1	2	0	0	0	1	1	1	0	2	0	2	1	1	1	1	1	0	16
Fungal-type cellulose-binding domain	Lipase GDSL	OG0014494	CBM_1,Lipase_GDSL_2	0	0	0	0	1	0	0	0	0	0	0	0	0	0	0	0	0	0	0	0	0	1
Fungalysin/Thermolysin Propeptide Motif	Metalloprotease M36	OG0000060	FTP,Peptidase_M36	0	0	0	5	0	0	0	0	5	5	5	0	5	0	5	5	5	5	5	5	2	62
G-X-X-X-Q-X-W domain-containing protein	G-X-X-X-Q-X-W domain-containing protein	OG0008845, OG0013402, OG0015785, OG0015990, OG0015992	Ricin_B_lectin, Ricin_B_lectin, Ricin_B_lectin, Ricin_B_lectin, Ricin_B_lectin	0	0	0	0	0	0	0	0	0	0	0	0	0	0	0	0	0	0	0	0	9	9
GDSL-like Lipase/Acylhydrolase family	Lipase GDSL	OG0006310, OG0010431	Lipase_GDSL_2, Lipase_GDSL_2	0	0	0	1	2	0	0	0	1	2	1	0	1	0	2	0	1	0	0	1	0	13
GMC oxidoreductase	GMC oxidoreductase family	OG0001110, OG0009033, OG0012040, OG0017529	GMC_oxred_C,GMC_oxred_N, GMC_oxred_C,GMC_oxred_N,NAD_binding_8, GMC_oxred_C,GMC_oxred_N, GMC_oxred_C,GMC_oxred_N,NAD_binding_8,Pyr_redox_2	1	1	1	1	8	2	1	1	1	1	1	1	1	1	1	1	1	1	1	1	2	31
GPI anchored cell wall protein	GPI anchored	OG0005460	NA	0	0	0	1	0	0	0	0	1	1	1	0	1	0	1	1	1	1	1	1	0	13
GPI anchored protein	GPI anchored	OG0005452	NA	0	0	0	1	0	0	0	0	1	1	1	0	2	0	1	1	1	1	1	1	0	13
GPI anchored serine-rich protein	GPI anchored	OG0005360	NA	0	0	0	1	1	0	0	0	1	1	1	0	1	0	1	1	1	1	1	1	0	13
Gamma interferon inducible lysosomal thiol reductase (GILT)	Di-sulfide bond reduction	OG0004040	GILT	0	0	0	1	2	0	0	0	1	1	1	0	1	0	1	1	1	1	1	1	2	16
Gamma-glutamyltranspeptidase	Gamma-glutamyltranspeptidase	OG0013987	G_glu_transpept	0	0	0	1	0	0	0	0	0	0	1	0	1	0	0	0	0	0	0	0	0	3
Glucose sorbosone	Glucose sorbosone	OG0007747	NA	0	0	0	0	2	0	0	0	0	0	0	0	0	0	0	0	2	0	0	0	2	6
Glyco_18	Glycoside hydrolase	OG0006332, OG0008817	Chitin_bind_1,Glyco_hydro_18,LysM, Glyco_hydro_18	0	0	0	0	0	0	0	0	1	1	1	0	0	0	1	1	1	1	1	2	3	14
Glycoside Hydrolase	Glycoside hydrolase	OG0016312, OG0019712	Glyco_hydro_71, Glyco_hydro_71	0	0	0	0	0	0	0	0	0	0	0	0	0	0	0	0	0	0	0	0	3	3
Glycoside hydrolase family 10 protein	Glycoside hydrolase	OG0010702	Glyco_hydro_10	0	0	0	0	2	0	0	0	0	0	0	0	0	0	0	0	0	0	0	0	0	2
Glycoside hydrolase family 13 protein	Glycoside hydrolase	OG0007235, OG0008050	Alpha-amylase,CBM_20,DUF1966, Alpha-amylase,DUF1966	0	0	0	0	9	0	0	0	0	0	0	0	0	0	0	0	0	0	0	0	2	11
Glycoside hydrolase family 131 protein	Glycoside hydrolase	OG0011994	CBM_1	0	0	0	0	2	0	0	0	0	0	0	0	0	0	0	0	0	0	0	0	0	2
Glycoside hydrolase family 16 protein	Glycoside hydrolase	OG0000168	Glyco_hydro_16	0	0	0	2	9	3	2	2	2	2	2	0	2	0	2	2	2	2	2	2	7	47
Glycoside hydrolase family 17 protein	Glycoside hydrolase	OG0010493	But2,Glyco_hydro_17	0	0	0	0	2	0	0	0	0	0	0	0	0	0	0	0	0	0	0	0	0	2
Glycoside hydrolase family 2 protein	Glycoside hydrolase	OG0010405, OG0010417, OG0010472	DUF4982,Glyco_hydro_2,Glyco_hydro_2_C,Glyco_hydro_2_N, Glyco_hydro_2, Glyco_hydro_2,Glyco_hydro_2_C,Glyco_hydro_2_N	0	0	0	0	6	0	0	0	0	0	0	0	0	0	0	0	0	0	0	0	0	6
Glycoside hydrolase family 28 protein	Glycoside hydrolase	OG0008320, OG0010721	Glyco_hydro_28, Glyco_hydro_28	0	0	0	0	6	0	0	0	0	0	0	0	0	0	0	0	0	0	0	0	0	6
Glycoside hydrolase family 29 protein	Glycoside hydrolase	OG0006898	Alpha_L_fucos	0	0	0	0	2	0	0	0	0	0	0	0	0	0	0	0	0	0	0	0	5	7
Glycoside hydrolase family 3 protein	Glycoside hydrolase	OG0007500, OG0012211	Fn3-like,Glyco_hydro_3,Glyco_hydro_3_C, Fn3-like,Glyco_hydro_3,Glyco_hydro_3_C,PA14	0	0	0	0	7	0	0	0	0	0	0	0	0	0	0	0	0	0	0	0	0	7
Glycoside hydrolase family 43 protein	Glycoside hydrolase	OG0008042	Glyco_hydro_43	0	0	0	0	4	0	0	0	0	0	0	0	0	0	0	0	0	0	0	0	0	4
Glycoside hydrolase family 51 protein	Glycoside hydrolase	OG0012085	Alpha-L-AF_C,CBM_4_9	0	0	0	0	2	0	0	0	0	0	0	0	0	0	0	0	0	0	0	0	0	2
Glycoside hydrolase family 54	Glycoside hydrolase	OG0010362	AbfB,ArabFuran-catal	0	0	0	0	2	0	0	0	0	0	0	0	0	0	0	0	0	0	0	0	0	2
Glycoside hydrolase family 78 protein	Glycoside hydrolase	OG0010684, OG0010784	Bac_rhamnosid6H,Bac_rhamnosid_C, Bac_rhamnosid6H,Bac_rhamnosid_C,Trehalase	0	0	0	0	4	0	0	0	0	0	0	0	0	0	0	0	0	0	0	0	0	4
Glycoside hydrolase family 79	Cellulase	OG0010373	Cellulase,Glyco_hydro_79C	0	0	0	0	2	0	0	0	0	0	0	0	0	0	0	0	0	0	0	0	0	2
Glycoside hydrolase family 95 protein	Glycoside hydrolase	OG0011749, OG0012120	Glyco_hyd_65N_2, Glyco_hyd_65N_2	0	0	0	0	4	0	0	0	0	0	0	0	0	0	0	0	0	0	0	0	0	4
Glycoside-hydrolase family GH114	Glycoside hydrolase	OG0012947	Glyco_hydro_114	0	0	0	0	0	0	0	0	0	0	0	0	0	0	0	0	0	0	0	0	2	2
Glycosyl Hydrolase Family 88	Glycoside hydrolase	OG0013458	Glyco_hydro_88	0	0	0	0	0	0	0	0	0	0	0	0	0	0	0	0	0	0	0	0	2	2
Glycosyl hydrolase	Glycoside hydrolase	OG0014412	Glyco_hydro_76	0	0	0	0	2	0	0	0	0	0	0	0	0	0	0	0	0	0	0	0	0	2
Glycosyl hydrolase catalytic core	Glycoside hydrolase	OG0003524, OG0006805, OG0008341, OG0010979	Glyco_hydro_cc, Glyco_hydro_cc, Glyco_hydro_cc, Glyco_hydro_cc	0	0	0	1	9	3	2	2	1	1	1	0	1	0	1	1	1	1	1	1	6	34
Glycosyl hydrolase family 45	Glycoside hydrolase	OG0014136, OG0017366	CBM_1,Glyco_hydro_45, CBM_1,Glyco_hydro_45	0	0	0	0	2	0	0	0	0	0	0	0	0	0	0	0	0	0	0	0	0	2
Glycosyl hydrolase family 53	Glycoside hydrolase	OG0009773	Glyco_hydro_53	0	0	0	0	2	0	0	0	0	0	0	0	0	0	0	0	0	0	0	0	0	2
Glycosyl hydrolase family 61	Glycoside hydrolase	OG0010467, OG0012042, OG0014378	Glyco_hydro_61, Glyco_hydro_61, Glyco_hydro_61	0	0	0	0	5	0	0	0	0	0	0	0	0	0	0	0	0	0	0	0	0	5
Glycosyl hydrolase family 71	Glycoside hydrolase	OG0007232	Glyco_hydro_71,WSC	0	0	0	0	2	0	0	0	0	0	0	0	0	0	0	0	0	0	0	0	4	6
Glycosyl hydrolase family 79 C-terminal beta domain	Glycoside hydrolase	OG0010953	Glyco_hydro_79C	0	0	0	0	2	0	0	0	0	0	0	0	0	0	0	0	0	0	0	0	0	2
Glycosyl hydrolases family 15	Glycoside hydrolase	OG0002957	CBM_21,Glyco_hydro_15	1	1	0	1	2	0	0	0	2	1	1	1	1	1	1	1	1	1	1	1	2	21
Glycosyl hydrolases family 16	Glycoside hydrolase	OG0005158	Glyco_hydro_16	0	0	0	1	0	0	0	0	1	1	1	0	1	0	1	1	1	1	1	1	0	12
Glycosyl hydrolases family 18	Glycoside hydrolase	OG0012586, OG0012941	Glyco_hydro_18, Glyco_hydro_18	0	0	0	0	0	0	0	0	0	0	0	0	0	0	0	0	0	0	0	0	4	4
Glycosyl hydrolases family 28	Glycoside hydrolase	OG0010535	Glyco_hydro_28	0	0	0	0	2	0	0	0	0	0	0	0	0	0	0	0	0	0	0	0	0	2
Glycosyl hydrolases family 32 N-terminal domain	Glycoside hydrolase	OG0004707	Glyco_hydro_32N,Glyco_hydro_43,Laminin_G_3	0	0	0	1	2	0	0	0	1	1	1	0	1	0	1	1	1	1	1	1	0	14
Glycosyl hydrolases family 43	Glycoside hydrolase	OG0012238	Glyco_hydro_43	0	0	0	0	2	0	0	0	0	0	0	0	0	0	0	0	0	0	0	0	0	2
HET domain protein	HET domain protein	OG0013953	HET	0	0	0	1	0	0	0	0	0	0	0	0	1	0	0	0	0	0	0	0	0	2
Haloacid dehalogenase-like hydrolase	Haloacid dehalogenase-like hydrolase	OG0012718	HAD_2,Hydrolase,Hydrolase_like	0	0	0	0	0	0	0	0	0	0	0	0	0	0	0	0	0	0	0	0	2	2
Hsp90 protein	Heat shock associated	OG0001203	HSP90	1	1	1	1	1	1	1	1	1	1	1	1	1	1	1	1	2	1	1	1	2	24
Hydrophobic surface binding protein A	Hydrophobic surface binding protein A	OG0004639, OG0006356, OG0008779, OG0010415, OG0010481, OG0010928, OG0011784	HsbA, HsbA, HsbA, HsbA, HsbA, HsbA, HsbA	0	0	0	1	10	0	0	0	3	3	3	0	3	0	2	2	2	2	2	2	0	37
Hydrophobins	Hydrophobins	OG0005819	Hydrophobin	0	0	0	1	0	0	0	0	1	1	1	0	1	0	1	1	1	1	1	1	0	12
Hyphally regulated cell wall protein N-terminal	Hyr1, cell wall protein	OG0009238, OG0015591, OG0018145	Hyphal_reg_CWP, Hyphal_reg_CWP, Hyphal_reg_CWP	0	0	0	0	0	0	0	0	0	0	0	6	0	0	0	0	0	0	0	0	0	6
IgA Peptidase M64	Metalloprotease M64	OG0012899	Peptidase_M64	0	0	0	0	0	0	0	0	0	0	0	0	0	0	0	0	0	0	0	0	2	2
IgE-binding protein	IgE-binding protein	OG0004925	Carb_bind	0	0	0	1	2	0	0	0	1	1	1	0	1	0	1	1	1	1	1	1	0	14
Involved in maceration and soft-rotting of plant tissue	Pectinesterase	OG0010650, OG0011648	Pectinesterase, Pectinesterase	0	0	0	0	4	0	0	0	0	0	0	0	0	0	0	0	0	0	0	0	0	4
Involved in spore wall assembly. May be a component of the mitochondrial RNase MRP (MtMRP), a ribonucleoprotein endoribonuclease involved in the cleaving RNA transcripts to generate primers for DNA replication in mitochondria	May be a component of MtMRP	OG0008922, OG0014847	DUF3659, DUF3659	1	1	1	0	0	0	0	0	0	0	0	1	0	1	0	0	0	0	0	0	0	5
Involved in the export of PMA1, possibly through the monitoring or assisting of PMA1 folding and acquisition of competence to enter vesicles	Involved in the export of PMA1	OG0014899	SOP4	0	0	0	0	0	0	0	0	0	0	0	1	0	0	0	0	0	0	0	0	0	1
Isochorismatase family	Isochorismatase family	OG0014051, OG0014493	Isochorismatase, Isochorismatase	0	0	0	0	2	0	0	0	0	0	0	0	0	0	0	0	0	0	0	0	0	2
Killer toxin-resistance protein 1	Killer toxin-resistance protein	OG0018344	KRE1	0	0	0	0	0	0	0	0	0	0	0	0	0	1	0	0	0	0	0	0	0	1
Lactonase, 7-bladed beta-propeller	Lactonase, 7-bladed beta-propeller	OG0003779	Lactonase	0	0	0	1	2	2	0	0	1	1	1	0	1	0	1	1	1	1	1	1	0	16
Lectin involved in the quality control of the secretory pathway. As a member of the endoplasmic reticulum-associated degradation lumenal (ERAD-L) surveillance system, targets misfolded endoplasmic reticulum lumenal glycoproteins for degradation (By similarity)	Lectin involved in the quality control of the secretory pathway	OG0010192	PRKCSH	1	1	0	0	0	0	0	0	0	0	0	0	0	0	0	0	0	0	0	0	0	2
LicD family	LicD family	OG0007453	LicD	5	0	1	0	1	0	0	0	0	0	0	0	0	0	0	0	0	0	0	0	0	7
Lipase class 2	Lipase	OG0014273, OG0017318	Lipase_2, Lipase_2	0	0	0	0	2	0	0	0	0	0	0	0	0	0	0	0	0	0	0	0	0	2
Lipase (class 3)	Lipase	OG0001573	Lipase_3	1	1	0	1	3	1	1	1	1	1	1	1	1	1	1	1	1	1	1	1	2	24
Lipase b	Lipase	OG0011658, OG0014250, OG0017549	DUF676, NA, NA	0	0	0	0	4	0	0	0	0	0	0	0	0	0	0	0	0	0	0	0	0	4
Lipase class 2	Lipase	OG0011773	Lipase_2	0	0	0	0	2	0	0	0	0	0	0	0	0	0	0	0	0	0	0	0	0	2
Lipoxygenase	Lipoxygenase	OG0011671	Lipoxygenase	0	0	0	0	2	0	0	0	0	0	0	0	0	0	0	0	0	0	0	0	0	2
LysM domain	LysM domain	OG0000052, OG0006551, OG0009160, OG0009977	LysM, LysM, Chitin_bind_1,Glyco_hydro_18,LysM, Chitin_bind_1,LysM	0	0	0	1	0	0	0	0	13	15	15	0	10	0	6	6	5	6	4	6	2	94
Lysin motif	LysM domain	OG0005272, OG0006409, OG0018105	LysM, LysM, LysM	0	0	0	1	0	0	0	0	2	2	3	0	2	0	2	2	2	2	3	2	0	25
Lytic polysaccharide mono-oxygenase, cellulose-degrading	Lytic polysaccharide mono-oxygenase	OG0014039	LPMO_10	0	0	0	0	1	0	0	0	0	0	0	0	0	0	0	0	0	0	0	0	0	1
Major royal jelly protein	Major royal jelly protein	OG0010696, OG0012166	MRJP, MRJP	0	0	0	0	4	0	0	0	0	0	0	0	0	0	0	0	0	0	0	0	0	4
Mannan endo-1,6-alpha-mannosidase	Glycoside hydrolase	OG0012159, OG0018558	Glyco_hydro_76, Glyco_hydro_76	0	0	0	0	2	0	0	0	0	0	0	0	0	1	0	0	0	0	0	0	0	3
Mating factor alpha	Mating factor alpha	OG0013758, OG0015283	MF_alpha,MF_alpha_N, MF_alpha,MF_alpha_N	1	0	1	0	0	0	0	0	0	0	0	1	0	0	0	0	0	0	0	0	0	3
Meiotically up-regulated gene family	Meiotically up-regulated gene family	OG0018069	MU117	0	0	0	0	0	0	0	0	0	1	0	0	0	0	0	0	0	0	0	0	0	1
Methyltransferase domain	Methyltransferase domain	OG0010423, OG0018095	Methyltransf_23,Methyltransf_25, Methyltransf_23	0	0	0	0	2	0	0	0	0	1	1	0	0	0	0	0	0	0	0	0	0	4
Multicopper oxidase	Multicopper oxidase	OG0000083, OG0007192, OG0010770, OG0011270	Cu-oxidase,Cu-oxidase_2,Cu-oxidase_3,PAN_4, Cu-oxidase_2,Cu-oxidase_3, Cu-oxidase,Cu-oxidase_2,Cu-oxidase_3, Cu-oxidase,Cu-oxidase_2,Cu-oxidase_3	0	0	0	2	24	0	0	0	3	4	3	0	4	0	3	3	4	3	3	4	6	69
Myosin class II heavy chain	Myosin class II heavy chain	OG0004450	NA	0	0	0	1	2	0	0	0	1	1	1	0	1	0	1	1	2	1	1	2	0	16
NAD-binding of NADP-dependent 3-hydroxyisobutyrate dehydrogenase	NAD-binding of NADP-dependent 3-hydroxyisobutyrate dehydrogenase	OG0003288	NAD_binding_11,NAD_binding_2	1	1	0	1	3	0	0	0	1	1	1	0	1	0	1	1	1	1	1	1	2	19
NlpC/P60 family	NlpC/P60 family	OG0005006	NLPC_P60	0	0	0	1	2	0	0	0	1	1	1	0	0	0	1	1	2	1	1	1	0	14
Non-catalytic module family expn	Non-catalytic module family expn	OG0013096	Barwin,DPBB_1	0	0	0	0	0	0	0	0	0	0	0	0	0	0	0	0	0	0	0	0	2	2
Non-catalytic module family expn protein	Non-catalytic module family expn protein	OG0003026	DPBB_1	0	0	0	1	0	2	1	1	0	0	1	0	1	0	1	1	1	1	1	1	4	18
PLC-like phosphodiesterase	PLC-like phosphodiesterase	OG0012052	NA	0	0	0	0	2	0	0	0	0	0	0	0	0	0	0	0	0	0	0	0	0	2
Pathogen effector; putative necrosis-inducing factor	Putative necrosis-inducing factor	OG0002853	Glyco_hydro_18,Hce2,LysM	0	0	0	1	0	0	0	0	3	4	6	0	2	0	2	2	1	1	2	1	0	26
Pectate lyase	Pectin lyase	OG0008220, OG0010531, OG0010840	Pectate_lyase, Pectate_lyase, Beta_helix,Chondroitinas_B	0	0	0	0	8	0	0	0	0	0	0	0	0	0	0	0	0	0	0	0	0	8
Pectinolytic enzymes consist of four classes of enzymes pectin lyase, polygalacturonase, pectin methylesterase and rhamnogalacturonase. Among pectinolytic enzymes, pectin lyase is the most important in depolymerization of pectin, since it cleaves internal glycosidic bonds of highly methylated pectins	Pectin lyase	OG0014402	Pec_lyase_C	0	0	0	0	1	0	0	0	0	0	0	0	0	0	0	0	0	0	0	0	0	1
Pectinolytic enzymes consist of four classes of enzymes pectin lyase, polygalacturonase, pectin methylesterase and rhamnogalacturonase. Among pectinolytic enzymes, pectin lyase is the most important in depolymerization of pectin, since it cleaves internal glycosidic bonds of highly methylated pectins (By similarity)	Pectin lyase	OG0009325	CBM_1,Pec_lyase_C	0	0	0	0	2	0	0	0	0	0	0	0	0	0	0	0	0	0	0	0	0	2
Pectinolytic enzymes consist of four classes of enzymes pectin lyase, polygalacturonase, pectin methylesterase and rhamnogalacturonase. Degrades the rhamnogalacturonan I (RG-I) backbone of pectin	Pectin lyase	OG0014320	CBM-like,fn3_3	0	0	0	0	1	0	0	0	0	0	0	0	0	0	0	0	0	0	0	0	0	1
Peptidase family M20/M25/M40	Metalloprotease M20	OG0018926	M20_dimer,Peptidase_M20,Peptidase_M28	0	0	0	0	0	0	0	0	0	0	0	0	0	1	0	0	0	0	0	0	0	1
Peptidase family M28	Metalloprotease M28	OG0010109	Peptidase_M28	0	0	0	0	0	0	0	0	0	0	0	0	0	0	0	0	0	0	0	0	2	2
Peptidase inhibitor I9	Serine protease S8	OG0013317	Inhibitor_I9,Peptidase_S8	0	0	0	0	0	0	0	0	0	0	0	0	0	0	0	0	0	0	0	0	2	2
Peroxidase, family 2	Peroxidase, family 2	OG0006329, OG0008048, OG0009032, OG0010513, OG0012188, OG0014237	Peroxidase_2, Peroxidase_2, Peroxidase_2, Peroxidase_2, Peroxidase_2, Peroxidase_2	0	0	0	0	18	0	0	0	0	0	0	0	0	0	0	0	0	0	0	0	6	24
Pfam:PA14_2	Pfam:PA14_2	OG0015572	GLEYA	0	0	0	0	0	0	0	0	0	0	0	1	0	0	0	0	0	0	0	0	0	1
Pheromone	Adhesion, hyr/iff-like	OG0014482, OG0017424	Hyphal_reg_CWP, Hyphal_reg_CWP	0	0	0	0	2	0	0	0	0	0	0	0	0	0	0	0	0	0	0	0	0	2
Phophatidylserine decarboxylase	Phophatidylserine decarboxylase	OG0010616	PSDC,PS_Dcarbxylase	0	0	0	0	2	0	0	0	0	0	0	0	0	0	0	0	0	0	0	0	0	2
Phosphatidylethanolamine-binding protein	Phosphatidylethanolamine-binding protein	OG0010549, OG0013581	PBP, PBP	0	0	0	0	2	0	0	0	0	0	0	0	0	0	0	0	0	0	0	0	2	4
Phosphoesterase family	Phosphoesterase family	OG0000710, OG0007739, OG0009743	Phosphoesterase, Phosphoesterase, Phosphoesterase	0	0	0	2	6	0	6	7	1	1	1	0	1	0	1	1	1	1	2	1	2	36
Phosphoinositide phospholipase C, Ca2+-dependent	Phospholipase	OG0011699	PI-PLC-C1	0	0	0	0	2	0	0	0	0	0	0	0	0	0	0	0	0	0	0	0	0	2
Phytanoyl-CoA dioxygenase (PhyH)	Phytanoyl-CoA dioxygenase (PhyH)	OG0007363	PhyH	0	0	0	0	4	0	0	0	0	0	0	0	0	0	0	0	0	0	0	0	2	6
Phytase	Phytase	OG0001852	EGF_2,Phytase	1	1	1	1	1	2	1	1	1	1	1	1	1	1	2	1	1	1	1	1	2	25
Poly A polymerase head domain	Poly A polymerase head domain	OG0001280	PolyA_pol,PolyA_pol_RNAbd,Tti2	1	1	1	1	2	2	1	1	1	1	1	1	1	1	1	1	1	1	1	1	2	25
Polysaccharide deacetylase	Polysaccharide deacetylase	OG0000145, OG0000258, OG0005239, OG0015642	Chitin_bind_1,Polysacc_deac_1, Polysacc_deac_1, Polysacc_deac_1, Polysacc_deac_1	0	0	0	6	4	5	1	1	7	7	7	0	6	0	6	6	6	7	6	6	6	93
Polysaccharide lyase family 3 protein	Pectin lyase	OG0010620	Pectate_lyase	0	0	0	0	2	0	0	0	0	0	0	0	0	0	0	0	0	0	0	0	0	2
Pregnancy-associated plasma protein-A	Metalloprotease M43	OG0012147	Peptidase_M43	0	0	0	0	2	0	0	0	0	0	0	0	0	0	0	0	0	0	0	0	0	2
Prenylcysteine lyase	Prenylcysteine lyase	OG0002716	NAD_binding_8,Prenylcys_lyase	0	0	0	1	3	2	1	1	1	1	1	0	1	0	1	1	1	1	1	1	3	22
Pro-kumamolisin, activation domain	Serine protease S8	OG0010426, OG0012317, OG0014045, OG0017846	Pro-kuma_activ, Peptidase_S8,Pro-kuma_activ, Pro-kuma_activ, Peptidase_S8,Pro-kuma_activ	0	0	0	0	4	2	0	0	0	0	0	0	0	0	0	0	0	0	0	0	0	6
Prolyl 4-hydroxylase alpha subunit homologues.	Prolyl 4-hydroxylase	OG0006608	2OG-FeII_Oxy_3	0	0	0	0	2	0	0	0	0	0	0	0	1	0	1	1	1	1	1	1	0	10
Protease component of the SPS-sensor system, which regulates the expression of several amino acid-metabolizing enzymes and amino acid- and peptide-permeases in response to extracellular amino acid levels by controlling the activity of two transcription factors, STP1 and STP2. Catalyzes the activation of these transcription factors, which are synthesized as latent cytoplasmic precursors, by proteo…	Serine protease S64	OG0005699	Peptidase_S64	0	0	0	1	0	0	0	0	1	1	1	0	1	0	1	1	1	1	1	1	0	12
Protein disulfide isomerase	Protein disulfide isomerase	OG0001657	Thioredoxin,Thioredoxin_6	1	1	1	1	2	2	1	1	1	1	1	1	1	1	1	1	1	1	1	1	2	25
Protein of unknown function (DUF1214)	Protein of unknown function	OG0017674	DUF1214,DUF1254	0	0	0	0	1	0	0	0	0	0	0	0	0	0	0	0	0	0	0	0	0	1
Protein of unknown function (DUF1593)	Protein of unknown function	OG0010834	DUF1593	0	0	0	0	2	0	0	0	0	0	0	0	0	0	0	0	0	0	0	0	0	2
Protein of unknown function (DUF1620)	PQQ containing protein	OG0002251	DUF1620,PQQ_2	1	1	1	1	2	1	1	1	1	1	1	1	1	1	1	1	1	1	1	1	2	24
Protein of unknown function (DUF3246)	Mid2, plasma membrane protein	OG0009527	DUF3246,Mid2	2	1	0	0	0	0	0	0	0	0	0	0	0	0	0	0	0	0	0	0	0	3
Protein of unknown function (DUF3455)	Protein of unknown function	OG0006311	DUF3455	0	0	0	1	0	0	0	0	1	1	1	0	0	0	1	1	1	1	1	1	0	11
Protein of unknown function (DUF3602)	Protein of unknown function	OG0006010	DUF3602	0	0	0	1	2	0	0	0	1	1	1	0	0	0	1	1	1	1	1	1	0	13
Proteoglycan 4	Proteoglycan 4	OG0010717	NA	0	0	0	0	2	0	0	0	0	0	0	0	0	0	0	0	0	0	0	0	0	2
Purine nucleoside permease (NUP)	Purine nucleoside permease (NUP)	OG0006180	NUP	2	1	2	0	1	1	1	1	0	0	0	0	0	1	0	0	0	0	0	0	2	12
Putative esterase	Putative esterase	OG0010595	Esterase	0	0	0	0	2	0	0	0	0	0	0	0	0	0	0	0	0	0	0	0	0	2
Putative peptidase family	Metalloprotease	OG0004444	HRXXH	0	0	0	1	0	0	0	0	1	1	1	0	1	0	1	1	1	1	1	1	3	14
Putative stress-responsive nuclear envelope protein	Putative stress-response	OG0002985, OG0011010	Ish1, Ish1	1	1	1	1	2	2	1	1	1	1	1	1	1	0	1	1	1	1	1	1	2	24
Pyridoxamine 5'-phosphate oxidase	Pyridoxamine 5'-phosphate oxidase	OG0003159	Pyrid_oxidase_2	0	1	1	1	2	2	1	0	1	1	1	0	1	0	1	1	1	1	1	1	2	21
RNA polymerase II	RNA polymerase II	OG0001577	BRCT,NIF,PTCB-BRCT	1	1	1	1	2	3	1	1	1	1	1	1	1	1	1	1	1	1	1	1	2	26
RNA recognition motif	RNA recognition motif	OG0002676, OG0013203, OG0015981	EF-hand_5,EF-hand_6,EF-hand_7, RRM_1, RRM_1	1	1	0	1	1	2	1	1	1	1	1	1	1	1	1	1	1	1	1	1	6	27
Repeat domain in Vibrio, Colwellia, Bradyrhizobium and Shewanella	Lipase GDSL	OG0006188	Lipase_GDSL_2,VCBS	0	0	0	3	2	0	0	0	1	2	3	0	0	0	0	0	0	0	0	0	0	11
Required for protein translocation and folding in the endoplasmic reticulum (ER). Functions as a nucleotide exchange factor for the ER lumenal chaperone KAR2 (By similarity)	Protein translocation and folding in the endoplasmic reticulum (ER)	OG0007447	SIL1	1	1	1	0	0	0	0	0	0	0	0	1	0	1	0	0	0	0	0	0	0	5
Ricin b lectin	Ricin b lectin	OG0010496	NA	0	0	0	0	2	0	0	0	0	0	0	0	0	0	0	0	0	0	0	0	0	2
Ricin-type beta-trefoil	Cellulase	OG0015866, OG0016085, OG0019618	Cellulase,GLEYA,Ricin_B_lectin, Cellulase,GLEYA,Ricin_B_lectin, Cellulase,GLEYA,Ricin_B_lectin	0	0	0	0	0	0	0	0	0	0	0	0	0	0	0	0	0	0	0	0	3	3
Ricin-type beta-trefoil lectin domain	Ricin b lectin	OG0012681	Ricin_B_lectin	0	0	0	0	0	0	0	0	0	0	0	0	0	0	0	0	0	0	0	0	2	2
S1/P1 Nuclease	S1/P1 Nuclease	OG0006956	S1-P1_nuclease	0	0	0	0	2	0	0	0	0	0	0	0	0	0	0	0	0	0	0	0	2	4
SCP / Tpx-1 / Ag5 / PR-1 / Sc7 family of extracellular domains.	SCP family of extracellular domains	OG0013068, OG0015828	CAP, CAP	0	0	0	0	0	0	0	0	0	0	0	0	0	0	0	0	0	0	0	0	3	3
Saccharomyces cerevisiae YCL049c	Saccharomyces cerevisiae YCL049c	OG0015137	NA	0	0	0	0	0	0	0	0	0	0	0	1	0	0	0	0	0	0	0	0	0	1
Saccharomyces cerevisiae YJL171c	GPI anchored, yeast gene	OG0007664	DUF2401,DUF2403	1	1	1	0	0	0	0	0	0	0	0	1	0	1	0	0	0	0	0	0	0	5
Saccharomyces cerevisiae YLR040c	TIP1	OG0012449, OG0015137	SRP1_TIP1	0	0	0	0	0	0	0	0	0	0	0	2	0	1	0	0	0	0	0	0	0	3
Saccharomyces cerevisiae YNL190W	GPI anchored, yeast gene	OG0009550, OG0018122, OG0018328	NA, NA, NA	1	1	1	0	0	0	0	0	0	0	0	1	0	1	0	0	0	0	0	0	0	5
Secreted metalloproteinase that allows assimilation of proteinaceous substrates. Plays a pivotal role as a pathogenicity determinant during infections and contributes to the ability of the pathogen to persist within the mammalian host (By similarity)	Metalloprotease M43	OG0000834, OG0005258, OG0015744	Peptidase_M43, Peptidase_M43, Peptidase_M43	1	0	0	4	2	0	0	0	3	3	3	0	5	0	3	3	3	4	4	3	0	44
Secreted protein	GPI anchored	OG0005574, OG0006548, OG0009835	DUF4360, NA, NA	0	0	0	1	0	3	3	3	1	1	1	0	1	0	1	1	1	1	1	1	8	29
Secreted subtilisin-like serine protease with keratinolytic activity that contributes to pathogenicity	Serine protease S8	OG0005718, OG0006721	Inhibitor_I9,Peptidase_S8, Inhibitor_I9,Peptidase_S8	0	0	0	2	0	0	0	0	1	1	1	0	2	0	2	2	2	2	2	2	0	21
Ser-Thr-rich glycosyl-phosphatidyl-inositol-anchored membrane family	Ser-Thr-rich GPI anchored	OG0004931, OG0009996, OG0011161, OG0012628, OG0013498, OG0019082	GPI-anchored, GPI-anchored, GPI-anchored, GPI-anchored, GPI-anchored, GPI-anchored	0	0	0	1	2	0	0	0	1	1	1	0	1	0	1	1	1	1	1	1	6	20
Serine carboxypeptidase	Serine protease S28	OG0014450	Peptidase_S28	0	0	0	0	2	0	0	0	0	0	0	0	0	0	0	0	0	0	0	0	0	2
Serine carboxypeptidase S28	Serine protease S28	OG0003266	Peptidase_S28	0	0	0	1	3	2	0	1	1	1	0	0	0	0	1	1	1	1	1	1	6	22
Seripauperin and TIP1 family	TIP1	OG0006867, OG0018142	SRP1_TIP1, PIR,SRP1_TIP1	1	2	1	0	0	0	0	0	0	0	0	3	0	2	0	0	0	0	0	0	0	9
Sexual development protein	Sexual development protein	OG0011687	Ferritin_2	0	0	0	0	2	0	0	0	0	0	0	0	0	0	0	0	0	0	0	0	0	2
Sigma factor PP2C-like phosphatases	Sigma factor PP2C-like phosphatases	OG0001742	PP2C	1	1	1	1	2	2	1	1	1	1	1	1	1	1	1	1	1	1	1	1	2	25
Some similarities with uniprot P08640 Saccharomyces cerevisiae YIR019C MUC1 GPI-anchored cell surface glycoprotein required for diploid pseudohyphal formation and haploid invasive growth transcriptionally regulated by the MAPK pathway (via Ste12p and Tec1p) and the cAMP pathway (via Flo8p)	MUC1 cell surface glycoprotein	OG0018270	Candida_ALS,Candida_ALS_N,Flo11	0	0	0	0	0	0	0	0	0	0	0	0	0	1	0	0	0	0	0	0	0	1
Splits internally a 1,3-beta-glucan molecule and transfers the newly generated reducing end (the donor) to the non- reducing end of another 1,3-beta-glucan molecule (the acceptor) forming a 1,3-beta linkage, resulting in the elongation of 1,3- beta-glucan chains in the cell wall	Glycoside hydrolase	OG0003077, OG0014432	Glyco_hydro_72, Glyco_hydro_72	1	1	0	1	3	0	0	0	1	2	1	2	1	2	1	1	1	1	1	1	0	22
SprT-like zinc ribbon domain	SprT-like zinc ribbon domain	OG0000207	HMG_box,SprT-like,Zn_ribbon_SprT	3	3	3	2	2	0	0	0	2	2	2	3	2	3	2	2	2	2	2	3	2	44
Structure-specific nuclease with 5'-flap endonuclease and 5'-3' exonuclease activities involved in DNA replication and repair. During DNA replication, cleaves the 5'-overhanging flap structure that is generated by displacement synthesis when DNA polymerase encounters the 5'-end of a downstream Okazaki fragment. It enters the flap from the 5'-end and then tracks to cleave the flap base, leaving a …	Structure-specific endo/exo-nuclease	OG0015711	XPG_I,XPG_N	0	0	0	0	0	0	0	0	0	0	0	0	0	0	0	0	1	0	0	1	0	2
Subtilase family	Serine protease S8	OG0007398, OG0019257	Inhibitor_I9,Peptidase_S8, Inhibitor_I9,Peptidase_S8	0	0	0	0	0	0	0	0	1	1	1	0	0	0	0	1	0	1	1	0	0	6
Sulfatase	Sulfatase	OG0012063	Sulfatase	0	0	0	0	2	0	0	0	0	0	0	0	0	0	0	0	0	0	0	0	0	2
Survival protein SurE	Survival protein SurE	OG0009681	SurE	1	1	1	0	0	0	0	0	0	0	0	0	0	0	0	0	0	0	0	0	0	3
TAP-like protein	Alpha/beta hydrolase	OG0005367	Abhydrolase_1,Abhydrolase_4	0	0	0	0	4	0	0	0	1	1	1	0	1	0	1	2	1	1	1	1	0	16
TIM barrel metal-dependent hydrolase	TIM barrel metal-dependent hydrolase	OG0011809	Amidohydro_2	0	0	0	0	2	0	0	0	0	0	0	0	0	0	0	0	0	0	0	0	0	2
ThiF family	ThiF family	OG0002214	ThiF	1	1	2	1	2	1	1	1	1	1	1	1	1	2	1	1	1	1	1	1	1	25
Trehalase	Trehalase	OG0012513, OG0012987	Trehalase, Trehalase	0	0	0	0	0	0	0	0	0	0	0	0	0	0	0	0	0	0	0	0	4	4
Trehalose utilisation	Trehalose utilisation	OG0013020	ThuA	0	0	0	0	0	0	0	0	0	0	0	0	0	0	0	0	0	0	0	0	2	2
Ubiquitin 3 binding protein But2 C-terminal domain	Ubiquitin 3 binding protein But2 C-terminal domain	OG0004888, OG0010864	But2, But2	0	0	0	1	5	0	0	0	1	1	1	0	1	0	1	1	1	1	1	1	0	17
Uncharacterized conserved protein (DUF2183)	Uncharacterized conserved protein	OG0011644	DUF2183	0	0	0	0	2	0	0	0	0	0	0	0	0	0	0	0	0	0	0	0	0	2
Vacuolar ATP synthase subunit S1 (ATP6S1)	Vacuolar ATP synthase subunit S1 (ATP6S1)	OG0017462	NA	0	0	0	0	1	0	0	0	0	0	0	0	0	0	0	0	0	0	0	0	0	1
WD40 repeat-like protein	WD40 repeat-like protein	OG0001366	ANAPC4_WD40,Mcl1_mid,WD40	2	1	1	1	2	2	1	1	1	1	1	1	1	1	1	1	1	1	1	2	2	27
WD40-like Beta Propeller Repeat	WD40-like Beta Propeller Repeat	OG0014114	PD40	0	0	0	0	1	0	0	0	0	0	0	0	0	0	0	0	0	0	0	0	0	1
Wsc domain-containing protein	Wsc domain-containing protein	OG0005551	DUF1996,WSC	0	0	0	0	2	6	2	2	0	0	0	0	0	0	0	0	0	0	0	0	0	12
Xylanase inhibitor N-terminal	Xylanase inhibitor N-terminal	OG0019662	Asp	0	0	0	0	0	0	0	0	0	0	0	0	0	0	0	0	0	0	0	0	1	1
Yeast cell wall synthesis protein KRE9/KNH1	Cell wall synthesis KRE9/KNH1	OG0002998	GPI-anchored,KRE9	1	2	1	1	2	0	0	0	1	1	1	2	1	1	1	1	2	1	1	1	0	22
Zinc carboxypeptidase	Metalloprotease M14	OG0004986	Peptidase_M14	0	0	0	1	2	0	0	0	1	1	1	0	1	0	1	1	1	1	1	1	0	14
a crucial enzyme for depolymerization of seed galactomannans and wood galactoglucomannans	Cellulase	OG0010722	CBM_1,Cellulase	0	0	0	0	2	0	0	0	0	0	0	0	0	0	0	0	0	0	0	0	0	2
acid phosphatase	acid phosphatase	OG0007501	Metallophos,Metallophos_C,Pur_ac_phosph_N	0	0	0	0	2	0	0	0	0	0	0	0	0	0	0	0	0	0	0	0	3	5
alpha beta-hydrolase	Serine protease S9	OG0000396	PD40,Peptidase_S9	0	0	0	2	3	2	1	1	2	2	2	0	2	0	2	2	2	2	2	2	2	33
alpha-L-arabinofuranosidase	alpha-L-arabinofuranosidase	OG0010363, OG0017177	Alpha-L-AF_C,CBM_4_9, Alpha-L-AF_C,CBM_4_9	0	0	0	0	4	0	0	0	0	0	0	0	0	0	0	0	0	0	0	0	0	4
alpha-L-rhamnosidase	Glycoside hydrolase	OG0017518, OG0017527	Glyco_hydro_106, Glyco_hydro_106	0	0	0	0	2	0	0	0	0	0	0	0	0	0	0	0	0	0	0	0	0	2
beta-hexosaminidase	Glycoside hydrolase	OG0003796	Glyco_hydro_20,Glycohydro_20b2	1	1	1	1	0	0	0	0	1	1	1	0	1	0	1	1	1	1	1	1	1	16
binding of sperm to zona pellucida	Potential adhesion	OG0005369, OG0008172	NA, NA	0	0	0	0	0	0	0	0	3	2	3	0	2	0	2	1	2	1	1	2	0	21
bnr asp-box repeat	bnr asp-box repeat	OG0009750	NA	0	0	0	0	3	0	0	0	0	0	0	0	0	0	0	0	0	0	0	0	0	3
carbohydrate esterase family 15 protein	carbohydrate esterase family 15 protein	OG0011786	NA	0	0	0	0	2	0	0	0	0	0	0	0	0	0	0	0	0	0	0	0	0	2
carbohydrate-binding module family 13 protein	carbohydrate-binding module family 13 protein	OG0010024, OG0013442, OG0015970, OG0016251	Ricin_B_lectin, Ricin_B_lectin, Ricin_B_lectin, Ricin_B_lectin	0	0	0	0	0	0	0	0	0	0	0	0	0	0	0	0	0	0	0	0	8	8
carboxypeptidase that may be involved in cell wall organization and biogenesis	Metalloprotease M14	OG0003104	Peptidase_M14	1	1	1	1	2	0	0	0	1	1	1	1	1	1	1	1	1	1	1	1	2	21
cell wall protein	Hyr1, cell wall protein	OG0005371, OG0005875, OG0007079	Hyphal_reg_CWP,Hyr1, NA, PIR	3	1	4	1	0	0	0	0	1	1	1	11	1	0	1	1	1	1	1	2	0	32
cfem domain-containing protein	CFEM domain	OG0018619	Candida_ALS,Candida_ALS_N,Flo11	0	0	0	0	0	0	0	0	0	0	0	0	0	1	0	0	0	0	0	0	0	1
chitin binding protein	Chitin binding / recognition	OG0011815	LPMO_10	0	0	0	0	2	0	0	0	0	0	0	0	0	0	0	0	0	0	0	0	0	2
component of the endoplasmic reticulum- associated degradation (ERAD) pathway	Endoplasmic reticulum- associated degradation (ERAD) pathway	OG0008548	NA	1	1	1	0	0	0	0	0	0	0	0	1	0	0	0	0	0	0	0	0	1	5
cu Zn superoxide dismutase	Cu Zn superoxide dismutase	OG0003113	Sod_Cu	3	2	2	1	2	0	0	0	1	1	1	0	1	1	1	1	1	1	1	1	0	22
glycoside hydrolase family 16 protein	Glycoside hydrolase	OG0005666	NA	0	0	0	1	0	0	0	0	1	1	1	0	1	0	1	1	1	1	1	1	0	12
glycoside hydrolase family 2	Glycoside hydrolase	OG0005003	Glyco_hydro_2,Glyco_hydro_2_C,Glyco_hydro_2_N	0	0	0	1	0	0	0	0	1	1	1	0	1	0	1	1	1	1	1	1	2	14
glycoside hydrolase family 62 protein	Glycoside hydrolase	OG0010399	CBM_1,Glyco_hydro_62	0	0	0	0	2	0	0	0	0	0	0	0	0	0	0	0	0	0	0	0	0	2
glycoside hydrolase family 76 protein	Glycoside hydrolase	OG0010877	Glyco_hydro_76	0	0	0	0	2	0	0	0	0	0	0	0	0	0	0	0	0	0	0	0	0	2
gpi anchored	GPI anchored	OG0010394	Dioxygenase_C	0	0	0	0	2	0	0	0	0	0	0	0	0	0	0	0	0	0	0	0	0	2
lipocalin-like domain-containing protein	lipocalin-like domain-containing protein	OG0008675	Lipocalin_2	0	0	0	0	2	0	0	0	0	0	0	0	0	0	0	0	0	0	0	0	2	4
lysozyme	lysozyme	OG0013125	Phage_lysozyme,SH3_3	0	0	0	0	0	0	0	0	0	0	0	0	0	0	0	0	0	0	0	0	2	2
mRNA-binding protein involved in proper cytoplasmic distribution of mitochondria	mRNA-binding protein	OG0001396	CLU,CLU_N,DUF727,TPR_10,TPR_12,eIF3_p135	1	1	1	1	2	2	1	1	1	1	1	1	1	1	1	1	1	1	1	1	3	26
mannan endo-1,4-beta-mannosidase activity	mannan endo-1,4-beta-mannosidase activity	OG0009777	CBM_1	0	0	0	0	2	0	0	0	0	0	0	0	0	0	0	0	0	0	0	0	0	2
mmc protein	MMC protein, bleomycin binding	OG0004919	NA	1	0	0	1	0	0	0	0	1	1	1	1	1	0	1	1	1	1	1	1	0	14
pathogenesis	Pathogenesis	OG0008272, OG0008568, OG0010214, OG0010249, OG0017068, OG0017069, OG0017070	NA, NA, NA, NA, NA, NA, NA	7	6	5	0	0	0	0	0	0	0	0	0	0	0	0	0	0	0	0	0	0	18
pectin lyase	Pectin lyase	OG0014095	CBM_1,Pec_lyase_C	0	0	0	0	1	0	0	0	0	0	0	0	0	0	0	0	0	0	0	0	0	1
phosphatidylglycerol phosphatidylinositol transfer protein	phosphatidylglycerol phosphatidylinositol transfer protein	OG0012234	E1_DerP2_DerF2	0	0	0	0	2	0	0	0	0	0	0	0	0	0	0	0	0	0	0	0	0	2
proline rich protein	proline rich protein	OG0010776	NA	0	0	0	0	2	0	0	0	0	0	0	0	0	0	0	0	0	0	0	0	0	2
protocatechuate 3,4-dioxygenase activity	protocatechuate 3,4-dioxygenase activity	OG0008325	NA	0	0	0	0	2	0	0	0	0	0	0	0	0	0	0	0	0	0	0	0	2	4
regulation of mitochondrial expression of subunits 6 (Atp6p) and 8 (Atp8p) of the Fo-F1 ATP synthase	Mitochondrial expression of Atp6p and Atp8p	OG0018866	NCA2	0	0	0	0	0	0	0	0	0	0	0	0	0	1	0	0	0	0	0	0	0	1
repair protein Pso2 Snm1	repair protein Pso2 Snm1	OG0002133	DRMBL,Lactamase_B_2	1	1	1	1	2	2	1	1	1	1	1	1	0	1	1	1	1	1	1	1	2	24
response to estrogen	Response to estrogen	OG0010891	NA	0	0	0	0	2	0	0	0	0	0	0	0	0	0	0	0	0	0	0	0	0	2
selenium binding protein	selenium binding protein	OG0016219	SBP56	0	0	0	0	0	0	0	0	0	0	0	0	0	0	0	0	0	0	0	0	1	1
shows high activities on basic nuclear substrates such as histone and protamine	Metalloprotease M35	OG0000063	Peptidase_M35	0	0	0	5	2	0	0	0	5	5	5	0	5	0	5	5	6	5	5	6	0	64
some similarities with uniprot	Flocculin	OG0006826, OG0009976, OG0012451, OG0012458, OG0015320, OG0015386, OG0015525, OG0015556, OG0015561, OG0015577, OG0015582, OG0018325	Flocculin,GLEYA,Hyphal_reg_CWP, GLEYA, Asp,Flocculin,Hyphal_reg_CWP,SRP1_TIP1, Flocculin,GLEYA,Hyphal_reg_CWP, Flocculin,GLEYA,Hyphal_reg_CWP, Flocculin,GLEYA,Hyphal_reg_CWP, Flocculin,GLEYA,Hyphal_reg_CWP, Flocculin,GLEYA,Hyphal_reg_CWP, Flocculin,GLEYA,Hyphal_reg_CWP, Flocculin,GLEYA,Hyphal_reg_CWP, Flocculin,GLEYA,Hyphal_reg_CWP, Flocculin,GLEYA	0	0	0	0	0	0	0	0	0	0	0	21	0	1	0	0	0	0	0	0	0	22
structural constituent of cuticle	Cuticle	OG0016913	NA	0	1	0	0	0	0	0	0	0	0	0	0	0	0	0	0	0	0	0	0	0	1
structural molecule activity	structural molecule activity	OG0018148	Cyt-b5,Flocculin_t3	0	0	0	0	0	0	0	0	0	0	0	1	0	0	0	0	0	0	0	0	0	1
surface antigen	CFEM domain	OG0005254	CFEM	6	8	1	0	0	0	0	0	0	0	0	0	0	0	0	0	0	0	0	0	0	15
thaumatin domain protein	Thaumatin domain protein	OG0001432	Bys1	0	0	0	2	2	0	0	0	2	2	2	0	2	0	2	2	2	2	2	2	0	26
to Saccharomyces cerevisiae	PIR cell wall mannoprotein	OG0007707, OG0009239, OG0013837, OG0017028	PIR, PIR, PIR, PIR	2	3	1	0	2	0	0	0	0	0	0	2	0	4	0	0	0	0	0	0	0	14
to Saccharomyces cerevisiae CRH1 (YGR189C)	Glycoside hydrolase	OG0000062	Glyco_hydro_16	3	3	2	3	8	1	1	1	3	3	3	3	3	2	3	3	3	3	3	3	2	62
to Saccharomyces cerevisiae DAL81 (YIR023W)	DAL81 (YIR023W)	OG0018829	Fungal_trans,Zn_clus	0	0	0	0	0	0	0	0	0	0	0	0	0	1	0	0	0	0	0	0	0	1
to Saccharomyces cerevisiae DCP1 (YOL149W)	DCP1 (YOL149W)	OG0008611	DCP1	0	1	1	0	0	0	0	0	0	0	0	1	0	1	0	0	0	0	0	0	0	4
to Saccharomyces cerevisiae DSE2 (YHR143W)	DSE2 (YHR143W)	OG0015454	NA	0	0	0	0	0	0	0	0	0	0	0	1	0	0	0	0	0	0	0	0	0	1
to Saccharomyces cerevisiae ECM33 (YBR078W) and PST1 (YDR055W)	GPI anchored, yeast gene	OG0009959	Recep_L_domain	0	0	0	0	0	0	0	0	0	0	0	2	0	0	0	0	0	0	0	0	0	2
to Saccharomyces cerevisiae EGT2 (YNL327W)	GPI anchored, yeast gene	OG0015400	NA	0	0	0	0	0	0	0	0	0	0	0	1	0	0	0	0	0	0	0	0	0	1
to Saccharomyces cerevisiae GCR2 (YNL199C)	GCR2 (YNL199C)	OG0015472	NA	0	0	0	0	0	0	0	0	0	0	0	1	0	0	0	0	0	0	0	0	0	1
to Saccharomyces cerevisiae IRE1 (YHR079C)	Serine protease	OG0006374	Pkinase,Ribonuc_2-5A	1	1	2	0	2	0	0	0	0	0	0	2	0	1	0	0	0	0	0	0	2	11
to Saccharomyces cerevisiae MPD2 (YOL088C)	MPD2 (YOL088C)	OG0014973	Thioredoxin	0	0	0	0	0	0	0	0	0	0	0	1	0	0	0	0	0	0	0	0	0	1
to Saccharomyces cerevisiae PDI1 (YCL043C) and EUG1 (YDR518W)	PDI1 (YCL043C) and EUG1 (YDR518W)	OG0014978	Thioredoxin,Thioredoxin_6	0	0	0	0	0	0	0	0	0	0	0	1	0	0	0	0	0	0	0	0	0	1
to Saccharomyces cerevisiae SAG1 (YJR004C)	SAG1 (YJR004C)	OG0014954	Candida_ALS_N,Flocculin	0	0	0	0	0	0	0	0	0	0	0	1	0	0	0	0	0	0	0	0	0	1
to Saccharomyces cerevisiae SED1 (YDR077W) and SPI1 (YER150W)	GPI anchored, yeast gene	OG0018127	NA	0	0	0	0	0	0	0	0	0	0	0	1	0	0	0	0	0	0	0	0	0	1
to Saccharomyces cerevisiae SPS100 (YHR139C) and YGP1 (YNL160W)	SPS100 (YHR139C) and YGP1 (YNL160W)	OG0015294, OG0015453	NA, NA	0	0	0	0	0	0	0	0	0	0	0	2	0	0	0	0	0	0	0	0	0	2
to Saccharomyces cerevisiae SPS22 (YCL048W) and SPS2 (YDR522C)	GPI anchored, yeast gene	OG0015360	Recep_L_domain	0	0	0	0	0	0	0	0	0	0	0	1	0	0	0	0	0	0	0	0	0	1
to Saccharomyces cerevisiae TOS1 (YBR162C)	TOS1 (YBR162C)	OG0003150	DUF2401,DUF2403	1	1	1	1	2	0	0	0	1	1	1	1	1	1	1	1	2	1	1	1	0	21
to Saccharomyces cerevisiae YLR194C	GPI anchored, yeast gene	OG0015155	NA	0	0	0	0	0	0	0	0	0	0	0	1	0	0	0	0	0	0	0	0	0	1
uniprot P28319 Saccharomyces cerevisiae YKL096w CWP1 cell wall mannoprotein	PIR cell wall mannoprotein	OG0011140, OG0015385	PIR, PIR	0	0	0	0	0	0	0	0	0	0	0	3	0	0	0	0	0	0	0	0	0	3
von Willebrand factor (vWF) type A domain	von Willebrand factor (vWF) type A domain	OG0013332, OG0013593, OG0016058, OG0016209	VWA,VWA_2, VWA,VWA_2, VWA,VWA_2, VWA,VWA_2	0	0	0	0	0	0	0	0	0	0	0	0	0	0	0	0	0	0	0	0	6	6
Agglutinin-like protein	Agglutinin-like protein	OG0006286, OG0006286	Candida_ALS,Candida_ALS_N, Candida_ALS,Candida_ALS_N	10	6	16	0	0	0	0	0	0	0	0	0	0	0	0	0	0	0	0	0	0	32
Alkaline phosphatase	Alkaline phosphatase	OG0004049, OG0004049	Alk_phosphatase, Alk_phosphatase	0	0	0	2	4	0	0	0	2	2	2	0	2	0	2	2	2	2	2	2	2	30
Alpha-acetolactate decarboxylase	Alpha-acetolactate decarboxylase	OG0012629, OG0012629	AAL_decarboxy, AAL_decarboxy	0	0	0	0	0	0	0	0	0	0	0	0	0	0	0	0	0	0	0	0	4	4
Alpha/Beta hydrolase fold	Alpha/beta hydrolase	OG0008102, OG0010546	NA, Abhydrolase_6,Hydrolase_4	0	0	0	0	2	2	1	1	0	0	0	0	0	0	0	0	0	0	0	0	0	6
Aspartic peptidase domain superfamily	Aspartyl protease	OG0008909	NA	1	1	2	0	0	0	0	0	0	0	0	0	0	0	0	0	0	0	0	0	0	4
CYTH-like domain superfamily	CYTH-like domain superfamily	OG0012916	NA	0	0	0	0	0	0	0	0	0	0	0	0	0	0	0	0	0	0	0	0	2	2
Calmodulin/Myosin light chain/Troponin C-like	Calmodulin/Myosin light chain	OG0005026, OG0011990	NA, NA	0	0	0	1	4	0	0	0	1	1	1	0	1	0	1	1	1	1	1	1	0	16
Chondroitin AC/alginate lyase	Chondroitin AC/alginate lyase	OG0017685	Alginate_lyase	0	0	0	0	2	0	0	0	0	0	0	0	0	0	0	0	0	0	0	0	0	2
Copper acquisition factor BIM1-like	Copper acquisition factor BIM1-like	OG0004658	NA	0	0	0	1	2	0	0	0	1	1	1	0	1	0	1	1	1	1	1	1	0	14
Cupredoxin	Cupredoxin	OG0005996, OG0006154	NA, NA	0	0	0	2	0	0	0	0	2	2	2	0	2	0	2	2	2	2	2	2	0	24
Cytochrome cd1-nitrite reductase-like, haem d1 domain superfamily	Cytochrome cd1-nitrite reductase	OG0011944	NA	0	0	0	0	2	0	0	0	0	0	0	0	0	0	0	0	0	0	0	0	0	2
EF-hand domain pair	EF-hand domain pair	OG0005026, OG0011990	NA, NA	0	0	0	1	4	0	0	0	1	1	1	0	1	0	1	1	1	1	1	1	0	16
ER membrane protein complex subunit 7	ER membrane protein complex subunit 7	OG0004579	APH,Pkinase	0	0	0	1	2	0	0	0	2	1	1	0	1	0	0	1	1	1	1	1	0	14
Endochitinase-like superfamily	Endochitinase-like superfamily	OG0014375	NA	0	0	0	0	1	0	0	0	0	0	0	0	0	0	0	0	0	0	0	0	0	1
FAS1 domain superfamily	FAS1 domain superfamily	OG0008511	Fasciclin	1	1	1	0	0	0	0	0	0	0	0	0	0	1	0	0	0	0	0	0	0	4
GPI-Mannosyltransferase II co-activator, Pga1	GPI-Mannosyltransferase II co-activator, Pga1	OG0005588	Pga1	0	0	0	1	1	0	0	0	1	1	1	0	1	0	1	1	1	1	1	1	0	12
GPI-anchored Adhesion Regulator	GPI anchored	OG0013306	GPI-anchored	0	0	0	0	0	0	0	0	0	0	0	0	0	0	0	0	0	0	0	0	2	2
Galactose oxidase/kelch, beta-propeller	Galactose oxidase/kelch, beta-propeller	OG0013022	NA	0	0	0	0	0	0	0	0	0	0	0	0	0	0	0	0	0	0	0	0	2	2
Galactose-binding-like domain superfamily	Galactose-binding-like domain superfamily	OG0010491	Bac_rhamnosid6H,F5_F8_type_C,RicinB_lectin_2	0	0	0	0	2	0	0	0	0	0	0	0	0	0	0	0	0	0	0	0	0	2
Gamma-glutamyltranspeptidase	Gamma-glutamyltranspeptidase	OG0013987	G_glu_transpept, G_glu_transpept	0	0	0	2	0	0	0	0	0	0	2	0	2	0	0	0	0	0	0	0	0	6
Glycosyl hydrolase family 53	Glycoside hydrolase	OG0009773	Glyco_hydro_53, Glyco_hydro_53	0	0	0	0	4	0	0	0	0	0	0	0	0	0	0	0	0	0	0	0	0	4
Group XII secretory phospholipase A2 precursor	Phospholipase	OG0009281, OG0016099	PLA2G12, PLA2G12	0	0	0	0	0	0	0	0	0	0	0	0	0	0	0	0	0	0	0	0	4	4
Growth factor receptor cysteine-rich domain superfamily	Growth factor receptor	OG0012975	Stig1	0	0	0	0	0	0	0	0	0	0	0	0	0	0	0	0	0	0	0	0	2	2
Knottin, scorpion toxin-like superfamily	Knottin, anti-microbial peptide	OG0005459	NA	0	0	0	1	0	0	0	0	1	1	1	0	1	0	1	1	1	1	1	1	0	13
Lipoxygenase	Lipoxygenase	OG0011671	Lipoxygenase, Lipoxygenase	0	0	0	0	4	0	0	0	0	0	0	0	0	0	0	0	0	0	0	0	0	4
Lysozyme-like domain superfamily	Lysozyme-like domain superfamily	OG0013999, OG0014375	NA, NA	0	0	0	0	2	0	0	0	0	0	0	0	0	0	0	0	0	0	0	0	0	2
Mannan endo-1,6-alpha-mannosidase	Glycoside hydrolase	OG0012159, OG0018558	Glyco_hydro_76, Glyco_hydro_76, Glyco_hydro_76, Glyco_hydro_76	0	0	0	0	4	0	0	0	0	0	0	0	0	2	0	0	0	0	0	0	0	6
Microtubule associated protein 1	Microtubule associated protein 1	OG0012181	Clr5,MU117,TPR_12	0	0	0	0	2	0	0	0	0	0	0	0	0	0	0	0	0	0	0	0	0	2
Multicopper oxidase	Multicopper oxidase	OG0000083, OG0007192, OG0010770, OG0011270	Cu-oxidase,Cu-oxidase_2,Cu-oxidase_3,PAN_4, Cu-oxidase,Cu-oxidase_2,Cu-oxidase_3,PAN_4, Cu-oxidase,Cu-oxidase_2,Cu-oxidase_3,PAN_4, Cu-oxidase,Cu-oxidase_2,Cu-oxidase_3,PAN_4, Cu-oxidase_2,Cu-oxidase_3, Cu-oxidase_2,Cu-oxidase_3, Cu-oxidase,Cu-oxidase_2,Cu-oxidase_3, Cu-oxidase,Cu-oxidase_2,Cu-oxidase_3, Cu-oxidase,Cu-oxidase_2,Cu-oxidase_3, Cu-oxidase,Cu-oxidase_2,Cu-oxidase_3, Cu-oxidase,Cu-oxi…	0	0	0	8	88	0	0	0	12	16	12	0	16	0	12	12	16	12	12	16	22	266
Nucleotidyltransferase superfamily	Nucleotidyltransferase superfamily	OG0011262	NA	0	0	0	0	0	0	0	0	0	0	0	0	0	0	0	0	0	0	0	0	3	3
Osmotin/thaumatin-like superfamily	Osmotin/thaumatin-like superfamily	OG0010875	NA	0	0	0	0	2	0	0	0	0	0	0	0	0	0	0	0	0	0	0	0	0	2
PcRGLX/YetA-like	PcRGLX/YetA-like	OG0010817	NA	0	0	0	0	2	0	0	0	0	0	0	0	0	0	0	0	0	0	0	0	0	2
PhiA domain-containing protein	PhiA domain-containing protein	OG0006154	NA	0	0	0	1	0	0	0	0	1	1	1	0	1	0	1	1	1	1	1	1	0	12
Phospholipase A2 domain superfamily	Phospholipase	OG0009281, OG0016099	PLA2G12, PLA2G12	0	0	0	0	0	0	0	0	0	0	0	0	0	0	0	0	0	0	0	0	4	4
Protein PriA/CPL1	Protein PriA/CPL1	OG0012969, OG0012975, OG0013491, OG0015836, OG0015876, OG0016261	Stig1	0	0	0	0	0	0	0	0	0	0	0	0	0	0	0	0	0	0	0	0	9	9
Protein kinase-like domain superfamily	Protein kinase-like domain superfamily	OG0004579	APH,Pkinase	0	0	0	1	2	0	0	0	2	1	1	0	1	0	0	1	1	1	1	1	0	14
Ricin B-like lectins	Ricin B-like lectins	OG0011255, OG0013064	B-block_TFIIIC, B-block_TFIIIC, B-block_TFIIIC	0	0	0	0	0	0	0	0	0	0	0	0	0	0	0	0	0	0	0	0	7	7
Serine-rich & Multicopper Oxidase-related	Multicopper oxidase	OG0005996	NA	0	0	0	1	0	0	0	0	1	1	1	0	1	0	1	1	1	1	1	1	0	12
Six-hairpin glycosidase superfamily	Glycoside hydrolase	OG0008322, OG0010491	Carb_bind, Bac_rhamnosid6H,F5_F8_type_C,RicinB_lectin_2	0	0	0	0	4	0	0	0	0	0	0	0	0	0	0	0	0	0	0	0	2	6
Stanniocalcin	Stanniocalcin	OG0006135	Stanniocalcin	0	0	0	1	0	0	0	0	1	1	1	0	1	0	1	1	1	1	1	1	0	12
Uncharacterized protein AN11006-like	Uncharacterized protein AN11006-like	OG0017376	NA	0	0	0	0	1	0	0	0	0	0	0	0	0	0	0	0	0	0	0	0	0	1
Yeast Cell Wall Mannoprotein PIR	PIR cell wall mannoprotein	OG0015583	NA	0	0	0	0	0	0	0	0	0	0	0	1	0	0	0	0	0	0	0	0	0	1
Abhydrolase_6,Hydrolase_4	Alpha/beta hydrolase	OG0010546	Abhydrolase_6,Hydrolase_4	0	0	0	0	2	0	0	0	0	0	0	0	0	0	0	0	0	0	0	0	0	2
Astacin, M12	Metalloprotease M12	OG0008429, OG0012071	Astacin	0	0	0	0	4	0	0	0	1	1	1	0	1	0	1	0	0	0	0	0	0	9
But2	But2	OG0005635	But2	0	0	0	1	0	0	0	0	1	1	1	0	1	0	1	1	1	1	1	1	0	12
CFEM	CFEM domain	OG0008555	CFEM	1	1	3	0	0	0	0	0	0	0	0	0	0	0	0	0	0	0	0	0	0	5
Cellulase,GLEYA,Ricin_B_lectin	Cellulase	OG0011473	Cellulase,GLEYA,Ricin_B_lectin	1	0	2	0	0	0	0	0	0	0	0	0	0	0	0	0	0	0	0	0	0	3
Glyco_transf_54	Glyco_transf_54	OG0010331	Glyco_transf_54	0	0	0	1	0	0	0	0	1	0	0	0	0	0	0	0	0	0	0	0	0	2
PIR	PIR cell wall mannoprotein	OG0014936	PIR	0	0	0	0	0	0	0	0	0	0	0	1	0	0	0	0	0	0	0	0	0	1
SPT_ssu-like	Sphingomyelin associated	OG0006295	SPT_ssu-like	0	0	0	1	0	0	0	0	1	1	1	0	2	0	1	0	1	1	1	1	0	12
		OG0003520, OG0003721, OG0004405, OG0004533, OG0004804, OG0004832, OG0004885, OG0004909, OG0004929, OG0005332, OG0005345, OG0005402, OG0005406, OG0005518, OG0005520, OG0005558, OG0005683, OG0005696, OG0005760, OG0005820, OG0005830, OG0005873, OG0005914, OG0005936, OG0005950, OG0005968, OG0005974, OG0005982, OG0005983, OG0006026, OG0006033, OG0006046, OG0006072, OG0006074, OG0006080, OG0006086, OG0…		33	30	32	60	133	20	9	9	70	77	81	5	62	2	69	67	74	73	69	71	31	1144

## Sheet: Supplementary table 2 - Protein
Orthogroup	seed ortholog	evalue	score	eggNOG OGs	max annot lvl	COG category	Description	Preferred name	GOs	EC	KEGG ko	KEGG Pathway	KEGG Module	KEGG Reaction	KEGG rclass	BRITE	KEGG TC	CAZy	BiGG Reaction	PFAMs	IPR term	IPR description	Blastocladiella emersonii 22665	Candida dubliniensis 11945	Candida dubliniensis 2747	Candida dubliniensis 8501	Candida parapsilosis 11301	Candida parapsilosis 1954	Candida tropicalis 94	Epidermophyton floccosum 100148	Epidermophyton floccosum 10867	Epidermophyton floccosum 130802	Hortaea werneckii 100455	Hortaea werneckii 1163	Hortaea werneckii 41051	Malassezia furfur 14140-1	Malassezia furfur 14140-2	Malassezia furfur 1878	Malassezia furfur 6000	Malassezia globosa 7705	Malassezia globosa 7886	Malassezia globosa 8744	Malassezia restricta 7877	Malassezia restricta 7991	Microsporum audouinii 119449	Microsporum audouinii 33268	Microsporum canis 113480	Microsporum canis 15669	Microsporum canis 44551
OG0000011	104355.XP_007865362.1	1.73e-66	238	KOG1339@1|root,KOG1339@2759|Eukaryota,39SWH@33154|Opisthokonta,3NV4S@4751|Fungi,3UYQX@5204|Basidiomycota,225DM@155619|Agaricomycetes,3H0EQ@355688|Agaricomycetes incertae sedis	4751|Fungi	O	Belongs to the peptidase A1 family	-	-	3.4.23.25,3.4.23.5	ko:K01379,ko:K01381	ko04071,ko04138,ko04140,ko04142,ko04210,ko04915,ko05152,map04071,map04138,map04140,map04142,map04210,map04915,map05152	-	-	-	ko00000,ko00001,ko01000,ko01002,ko04147	-	-	-	Asp	IPR001461	Aspartic peptidase A1	1	6	6	6	14	13	15	2	2	3	5	3	4	4	4	9	10	2	2	2	2	2	2	2	3	1	3
OG0000011	104355.XP_007865362.1	1.73e-66	238	KOG1339@1|root,KOG1339@2759|Eukaryota,39SWH@33154|Opisthokonta,3NV4S@4751|Fungi,3UYQX@5204|Basidiomycota,225DM@155619|Agaricomycetes,3H0EQ@355688|Agaricomycetes incertae sedis	4751|Fungi	O	Belongs to the peptidase A1 family	-	-	3.4.23.25,3.4.23.5	ko:K01379,ko:K01381	ko04071,ko04138,ko04140,ko04142,ko04210,ko04915,ko05152,map04071,map04138,map04140,map04142,map04210,map04915,map05152	-	-	-	ko00000,ko00001,ko01000,ko01002,ko04147	-	-	-	Asp	IPR021109	Aspartic peptidase domain superfamily	1	6	6	6	14	13	15	2	2	3	5	3	4	4	4	9	10	2	2	2	2	2	2	2	3	1	3
OG0000011	104355.XP_007865362.1	1.73e-66	238	KOG1339@1|root,KOG1339@2759|Eukaryota,39SWH@33154|Opisthokonta,3NV4S@4751|Fungi,3UYQX@5204|Basidiomycota,225DM@155619|Agaricomycetes,3H0EQ@355688|Agaricomycetes incertae sedis	4751|Fungi	O	Belongs to the peptidase A1 family	-	-	3.4.23.25,3.4.23.5	ko:K01379,ko:K01381	ko04071,ko04138,ko04140,ko04142,ko04210,ko04915,ko05152,map04071,map04138,map04140,map04142,map04210,map04915,map05152	-	-	-	ko00000,ko00001,ko01000,ko01002,ko04147	-	-	-	Asp	IPR021109	Aspartic peptidase domain superfamily	1	6	6	6	14	13	15	2	2	3	5	3	4	4	4	9	10	2	2	2	2	2	2	2	3	1	3
OG0000011	104355.XP_007865362.1	1.73e-66	238	KOG1339@1|root,KOG1339@2759|Eukaryota,39SWH@33154|Opisthokonta,3NV4S@4751|Fungi,3UYQX@5204|Basidiomycota,225DM@155619|Agaricomycetes,3H0EQ@355688|Agaricomycetes incertae sedis	4751|Fungi	O	Belongs to the peptidase A1 family	-	-	3.4.23.25,3.4.23.5	ko:K01379,ko:K01381	ko04071,ko04138,ko04140,ko04142,ko04210,ko04915,ko05152,map04071,map04138,map04140,map04142,map04210,map04915,map05152	-	-	-	ko00000,ko00001,ko01000,ko01002,ko04147	-	-	-	Asp	IPR035427	Tim10-like domain superfamily	1	6	6	6	14	13	15	2	2	3	5	3	4	4	4	9	10	2	2	2	2	2	2	2	3	1	3
OG0000056	84751.XP_007879106.1	4.07e-126	390	COG2234@1|root,KOG2195@2759|Eukaryota,38HFK@33154|Opisthokonta,3NVAW@4751|Fungi,3UXY5@5204|Basidiomycota,3N2TN@452284|Ustilaginomycotina	4751|Fungi	O	Peptidase family M28	-	-	3.4.11.10	ko:K05994	-	-	-	-	ko00000,ko01000,ko01002	-	-	-	Peptidase_M28	IPR037737	Regulator of phospholipase D Srf1	0	1	1	1	1	1	2	4	4	4	2	1	2	1	1	1	2	1	1	1	1	1	4	4	4	4	4
OG0000090	120017.I2FWJ6	0	1134	COG0308@1|root,KOG1046@2759|Eukaryota,38CFG@33154|Opisthokonta,3NWST@4751|Fungi,3UYXA@5204|Basidiomycota,3N2UZ@452284|Ustilaginomycotina	4751|Fungi	E	ERAP1-like C-terminal domain	APE2	GO:0000322,GO:0000323,GO:0000324,GO:0000328,GO:0003674,GO:0003824,GO:0004177,GO:0005488,GO:0005575,GO:0005576,GO:0005618,GO:0005622,GO:0005623,GO:0005634,GO:0005737,GO:0005739,GO:0005768,GO:0005770,GO:0005771,GO:0005773,GO:0005775,GO:0005975,GO:0005976,GO:0005977,GO:0006073,GO:0006091,GO:0006112,GO:0006508,GO:0006518,GO:0006807,GO:0008104,GO:0008150,GO:0008152,GO:0008233,GO:0008235,GO:0008236,GO:…	3.4.11.2	ko:K01256,ko:K13721	ko00480,ko01100,map00480,map01100	-	R00899,R04951	RC00096,RC00141	ko00000,ko00001,ko01000,ko01002	-	-	-	ERAP1_C,Peptidase_M1	IPR050344	Peptidase M1 family aminopeptidases	4	1	1	2	2	2	2	3	2	2	4	2	5	2	2	4	4	3	3	3	2	2	2	2	2	2	3
OG0000090	120017.I2FWJ6	0	1134	COG0308@1|root,KOG1046@2759|Eukaryota,38CFG@33154|Opisthokonta,3NWST@4751|Fungi,3UYXA@5204|Basidiomycota,3N2UZ@452284|Ustilaginomycotina	4751|Fungi	E	ERAP1-like C-terminal domain	APE2	GO:0000322,GO:0000323,GO:0000324,GO:0000328,GO:0003674,GO:0003824,GO:0004177,GO:0005488,GO:0005575,GO:0005576,GO:0005618,GO:0005622,GO:0005623,GO:0005634,GO:0005737,GO:0005739,GO:0005768,GO:0005770,GO:0005771,GO:0005773,GO:0005775,GO:0005975,GO:0005976,GO:0005977,GO:0006073,GO:0006091,GO:0006112,GO:0006508,GO:0006518,GO:0006807,GO:0008104,GO:0008150,GO:0008152,GO:0008233,GO:0008235,GO:0008236,GO:…	3.4.11.2	ko:K01256,ko:K13721	ko00480,ko01100,map00480,map01100	-	R00899,R04951	RC00096,RC00141	ko00000,ko00001,ko01000,ko01002	-	-	-	ERAP1_C,Peptidase_M1	IPR042097	Aminopeptidase N-like , N-terminal domain superfamliy	4	1	1	2	2	2	2	3	2	2	4	2	5	2	2	4	4	3	3	3	2	2	2	2	2	2	3
OG0000091	63405.XP_002850684.1	0	1813	COG2234@1|root,KOG2195@2759|Eukaryota,38ERK@33154|Opisthokonta,3NV1R@4751|Fungi,3QMSF@4890|Ascomycota,20EA8@147545|Eurotiomycetes,3B2UX@33183|Onygenales,3FVCF@34384|Arthrodermataceae	4751|Fungi	OP	Transferrin receptor-like dimerisation domain	-	GO:0000322,GO:0000323,GO:0000324,GO:0000329,GO:0005575,GO:0005622,GO:0005623,GO:0005737,GO:0005773,GO:0005774,GO:0006508,GO:0006511,GO:0006807,GO:0006810,GO:0006886,GO:0007034,GO:0008104,GO:0008150,GO:0008152,GO:0009056,GO:0009057,GO:0009987,GO:0015031,GO:0015833,GO:0016020,GO:0016021,GO:0016192,GO:0016197,GO:0019538,GO:0019941,GO:0030163,GO:0031090,GO:0031166,GO:0031224,GO:0031300,GO:0031301,GO:…	3.4.17.21	ko:K01301	-	-	-	-	ko00000,ko01000,ko01002	-	-	-	PA,Peptidase_M28,TFR_dimer	IPR039373	Transferrin receptor protein 1/Glutamate carboxypeptidase 2-like	0	2	2	2	2	2	1	3	3	3	6	3	6	2	1	1	1	1	1	0	1	1	3	3	3	3	3
OG0000091	63405.XP_002850684.1	0	1813	COG2234@1|root,KOG2195@2759|Eukaryota,38ERK@33154|Opisthokonta,3NV1R@4751|Fungi,3QMSF@4890|Ascomycota,20EA8@147545|Eurotiomycetes,3B2UX@33183|Onygenales,3FVCF@34384|Arthrodermataceae	4751|Fungi	OP	Transferrin receptor-like dimerisation domain	-	GO:0000322,GO:0000323,GO:0000324,GO:0000329,GO:0005575,GO:0005622,GO:0005623,GO:0005737,GO:0005773,GO:0005774,GO:0006508,GO:0006511,GO:0006807,GO:0006810,GO:0006886,GO:0007034,GO:0008104,GO:0008150,GO:0008152,GO:0009056,GO:0009057,GO:0009987,GO:0015031,GO:0015833,GO:0016020,GO:0016021,GO:0016192,GO:0016197,GO:0019538,GO:0019941,GO:0030163,GO:0031090,GO:0031166,GO:0031224,GO:0031300,GO:0031301,GO:…	3.4.17.21	ko:K01301	-	-	-	-	ko00000,ko01000,ko01002	-	-	-	PA,Peptidase_M28,TFR_dimer	IPR036757	Transferrin receptor-like, dimerisation domain superfamily	0	2	2	2	2	2	1	3	3	3	6	3	6	2	1	1	1	1	1	0	1	1	3	3	3	3	3
OG0000091	63405.XP_002850684.1	0	1813	COG2234@1|root,KOG2195@2759|Eukaryota,38ERK@33154|Opisthokonta,3NV1R@4751|Fungi,3QMSF@4890|Ascomycota,20EA8@147545|Eurotiomycetes,3B2UX@33183|Onygenales,3FVCF@34384|Arthrodermataceae	4751|Fungi	OP	Transferrin receptor-like dimerisation domain	-	GO:0000322,GO:0000323,GO:0000324,GO:0000329,GO:0005575,GO:0005622,GO:0005623,GO:0005737,GO:0005773,GO:0005774,GO:0006508,GO:0006511,GO:0006807,GO:0006810,GO:0006886,GO:0007034,GO:0008104,GO:0008150,GO:0008152,GO:0009056,GO:0009057,GO:0009987,GO:0015031,GO:0015833,GO:0016020,GO:0016021,GO:0016192,GO:0016197,GO:0019538,GO:0019941,GO:0030163,GO:0031090,GO:0031166,GO:0031224,GO:0031300,GO:0031301,GO:…	3.4.17.21	ko:K01301	-	-	-	-	ko00000,ko01000,ko01002	-	-	-	PA,Peptidase_M28,TFR_dimer	IPR046450	PA domain superfamily	0	2	2	2	2	2	1	3	3	3	6	3	6	2	1	1	1	1	1	0	1	1	3	3	3	3	3
OG0000130	63400.XP_003013138.1	0	2953	COG5560@1|root,KOG1870@2759|Eukaryota,38FGF@33154|Opisthokonta,3NU7E@4751|Fungi,3QQE0@4890|Ascomycota,20FUJ@147545|Eurotiomycetes,3B13I@33183|Onygenales,3FTVI@34384|Arthrodermataceae	4751|Fungi	O	Belongs to the peptidase C19 family	-	GO:0003674,GO:0003824,GO:0004843,GO:0005575,GO:0005622,GO:0005623,GO:0005634,GO:0005737,GO:0006508,GO:0006807,GO:0008150,GO:0008152,GO:0008233,GO:0008234,GO:0016787,GO:0019538,GO:0019783,GO:0036459,GO:0043170,GO:0043226,GO:0043227,GO:0043229,GO:0043231,GO:0044238,GO:0044424,GO:0044464,GO:0070011,GO:0071704,GO:0101005,GO:0140096,GO:1901564	3.4.19.12	ko:K11835	-	-	-	-	ko00000,ko01000,ko01002,ko04121	-	-	-	DUSP,UCH	IPR036871	PX domain superfamily	2	3	2	3	3	3	3	2	2	2	4	2	4	3	3	2	5	1	2	2	1	2	2	2	2	2	2
OG0000130	63400.XP_003013138.1	0	2953	COG5560@1|root,KOG1870@2759|Eukaryota,38FGF@33154|Opisthokonta,3NU7E@4751|Fungi,3QQE0@4890|Ascomycota,20FUJ@147545|Eurotiomycetes,3B13I@33183|Onygenales,3FTVI@34384|Arthrodermataceae	4751|Fungi	O	Belongs to the peptidase C19 family	-	GO:0003674,GO:0003824,GO:0004843,GO:0005575,GO:0005622,GO:0005623,GO:0005634,GO:0005737,GO:0006508,GO:0006807,GO:0008150,GO:0008152,GO:0008233,GO:0008234,GO:0016787,GO:0019538,GO:0019783,GO:0036459,GO:0043170,GO:0043226,GO:0043227,GO:0043229,GO:0043231,GO:0044238,GO:0044424,GO:0044464,GO:0070011,GO:0071704,GO:0101005,GO:0140096,GO:1901564	3.4.19.12	ko:K11835	-	-	-	-	ko00000,ko01000,ko01002,ko04121	-	-	-	DUSP,UCH	IPR038765	Papain-like cysteine peptidase superfamily	2	3	2	3	3	3	3	2	2	2	4	2	4	3	3	2	5	1	2	2	1	2	2	2	2	2	2
OG0000130	63400.XP_003013138.1	0	2953	COG5560@1|root,KOG1870@2759|Eukaryota,38FGF@33154|Opisthokonta,3NU7E@4751|Fungi,3QQE0@4890|Ascomycota,20FUJ@147545|Eurotiomycetes,3B13I@33183|Onygenales,3FTVI@34384|Arthrodermataceae	4751|Fungi	O	Belongs to the peptidase C19 family	-	GO:0003674,GO:0003824,GO:0004843,GO:0005575,GO:0005622,GO:0005623,GO:0005634,GO:0005737,GO:0006508,GO:0006807,GO:0008150,GO:0008152,GO:0008233,GO:0008234,GO:0016787,GO:0019538,GO:0019783,GO:0036459,GO:0043170,GO:0043226,GO:0043227,GO:0043229,GO:0043231,GO:0044238,GO:0044424,GO:0044464,GO:0070011,GO:0071704,GO:0101005,GO:0140096,GO:1901564	3.4.19.12	ko:K11835	-	-	-	-	ko00000,ko01000,ko01002,ko04121	-	-	-	DUSP,UCH	IPR035927	DUSP-like superfamily	2	3	2	3	3	3	3	2	2	2	4	2	4	3	3	2	5	1	2	2	1	2	2	2	2	2	2
OG0000130	63400.XP_003013138.1	0	2953	COG5560@1|root,KOG1870@2759|Eukaryota,38FGF@33154|Opisthokonta,3NU7E@4751|Fungi,3QQE0@4890|Ascomycota,20FUJ@147545|Eurotiomycetes,3B13I@33183|Onygenales,3FTVI@34384|Arthrodermataceae	4751|Fungi	O	Belongs to the peptidase C19 family	-	GO:0003674,GO:0003824,GO:0004843,GO:0005575,GO:0005622,GO:0005623,GO:0005634,GO:0005737,GO:0006508,GO:0006807,GO:0008150,GO:0008152,GO:0008233,GO:0008234,GO:0016787,GO:0019538,GO:0019783,GO:0036459,GO:0043170,GO:0043226,GO:0043227,GO:0043229,GO:0043231,GO:0044238,GO:0044424,GO:0044464,GO:0070011,GO:0071704,GO:0101005,GO:0140096,GO:1901564	3.4.19.12	ko:K11835	-	-	-	-	ko00000,ko01000,ko01002,ko04121	-	-	-	DUSP,UCH	IPR051079	Sorting Nexin Autophagy-related	2	3	2	3	3	3	3	2	2	2	4	2	4	3	3	2	5	1	2	2	1	2	2	2	2	2	2
OG0000135	430998.XP_007679405.1	0	1612	COG0466@1|root,KOG2004@2759|Eukaryota,38CF0@33154|Opisthokonta,3NXAU@4751|Fungi,3QQPC@4890|Ascomycota,200GS@147541|Dothideomycetes,3MJNP@451867|Dothideomycetidae	4751|Fungi	L	ATP-dependent serine protease that mediates the selective degradation of misfolded, unassembled or oxidatively damaged polypeptides as well as certain short-lived regulatory proteins in the mitochondrial matrix. May also have a chaperone function in the assembly of inner membrane protein complexes. Participates in the regulation of mitochondrial gene expression and in the maintenance of the integ…	PIM1	GO:0000166,GO:0003674,GO:0003824,GO:0004175,GO:0004176,GO:0004252,GO:0005488,GO:0005524,GO:0005575,GO:0005622,GO:0005623,GO:0005737,GO:0005739,GO:0005759,GO:0006508,GO:0006515,GO:0006807,GO:0006996,GO:0007005,GO:0008144,GO:0008150,GO:0008152,GO:0008233,GO:0008236,GO:0009056,GO:0009057,GO:0009987,GO:0016043,GO:0016462,GO:0016787,GO:0016817,GO:0016818,GO:0016887,GO:0017076,GO:0017111,GO:0017171,GO:…	3.4.21.53	ko:K08675	-	-	-	-	ko00000,ko01000,ko01002,ko03029	-	-	-	AAA,LON_substr_bdg,Lon_C	IPR036291	NAD(P)-binding domain superfamily	2	2	2	2	2	2	2	2	2	2	4	2	4	2	2	2	2	2	2	2	2	2	2	2	2	2	2
OG0000135	430998.XP_007679405.1	0	1612	COG0466@1|root,KOG2004@2759|Eukaryota,38CF0@33154|Opisthokonta,3NXAU@4751|Fungi,3QQPC@4890|Ascomycota,200GS@147541|Dothideomycetes,3MJNP@451867|Dothideomycetidae	4751|Fungi	L	ATP-dependent serine protease that mediates the selective degradation of misfolded, unassembled or oxidatively damaged polypeptides as well as certain short-lived regulatory proteins in the mitochondrial matrix. May also have a chaperone function in the assembly of inner membrane protein complexes. Participates in the regulation of mitochondrial gene expression and in the maintenance of the integ…	PIM1	GO:0000166,GO:0003674,GO:0003824,GO:0004175,GO:0004176,GO:0004252,GO:0005488,GO:0005524,GO:0005575,GO:0005622,GO:0005623,GO:0005737,GO:0005739,GO:0005759,GO:0006508,GO:0006515,GO:0006807,GO:0006996,GO:0007005,GO:0008144,GO:0008150,GO:0008152,GO:0008233,GO:0008236,GO:0009056,GO:0009057,GO:0009987,GO:0016043,GO:0016462,GO:0016787,GO:0016817,GO:0016818,GO:0016887,GO:0017076,GO:0017111,GO:0017171,GO:…	3.4.21.53	ko:K08675	-	-	-	-	ko00000,ko01000,ko01002,ko03029	-	-	-	AAA,LON_substr_bdg,Lon_C	IPR027065	Lon protease	2	2	2	2	2	2	2	2	2	2	4	2	4	2	2	2	2	2	2	2	2	2	2	2	2	2	2
OG0000135	430998.XP_007679405.1	0	1612	COG0466@1|root,KOG2004@2759|Eukaryota,38CF0@33154|Opisthokonta,3NXAU@4751|Fungi,3QQPC@4890|Ascomycota,200GS@147541|Dothideomycetes,3MJNP@451867|Dothideomycetidae	4751|Fungi	L	ATP-dependent serine protease that mediates the selective degradation of misfolded, unassembled or oxidatively damaged polypeptides as well as certain short-lived regulatory proteins in the mitochondrial matrix. May also have a chaperone function in the assembly of inner membrane protein complexes. Participates in the regulation of mitochondrial gene expression and in the maintenance of the integ…	PIM1	GO:0000166,GO:0003674,GO:0003824,GO:0004175,GO:0004176,GO:0004252,GO:0005488,GO:0005524,GO:0005575,GO:0005622,GO:0005623,GO:0005737,GO:0005739,GO:0005759,GO:0006508,GO:0006515,GO:0006807,GO:0006996,GO:0007005,GO:0008144,GO:0008150,GO:0008152,GO:0008233,GO:0008236,GO:0009056,GO:0009057,GO:0009987,GO:0016043,GO:0016462,GO:0016787,GO:0016817,GO:0016818,GO:0016887,GO:0017076,GO:0017111,GO:0017171,GO:…	3.4.21.53	ko:K08675	-	-	-	-	ko00000,ko01000,ko01002,ko03029	-	-	-	AAA,LON_substr_bdg,Lon_C	IPR027417	P-loop containing nucleoside triphosphate hydrolase	2	2	2	2	2	2	2	2	2	2	4	2	4	2	2	2	2	2	2	2	2	2	2	2	2	2	2
OG0000135	430998.XP_007679405.1	0	1612	COG0466@1|root,KOG2004@2759|Eukaryota,38CF0@33154|Opisthokonta,3NXAU@4751|Fungi,3QQPC@4890|Ascomycota,200GS@147541|Dothideomycetes,3MJNP@451867|Dothideomycetidae	4751|Fungi	L	ATP-dependent serine protease that mediates the selective degradation of misfolded, unassembled or oxidatively damaged polypeptides as well as certain short-lived regulatory proteins in the mitochondrial matrix. May also have a chaperone function in the assembly of inner membrane protein complexes. Participates in the regulation of mitochondrial gene expression and in the maintenance of the integ…	PIM1	GO:0000166,GO:0003674,GO:0003824,GO:0004175,GO:0004176,GO:0004252,GO:0005488,GO:0005524,GO:0005575,GO:0005622,GO:0005623,GO:0005737,GO:0005739,GO:0005759,GO:0006508,GO:0006515,GO:0006807,GO:0006996,GO:0007005,GO:0008144,GO:0008150,GO:0008152,GO:0008233,GO:0008236,GO:0009056,GO:0009057,GO:0009987,GO:0016043,GO:0016462,GO:0016787,GO:0016817,GO:0016818,GO:0016887,GO:0017076,GO:0017111,GO:0017171,GO:…	3.4.21.53	ko:K08675	-	-	-	-	ko00000,ko01000,ko01002,ko03029	-	-	-	AAA,LON_substr_bdg,Lon_C	IPR027503	Lon protease homologue, chloroplastic/mitochondrial	2	2	2	2	2	2	2	2	2	2	4	2	4	2	2	2	2	2	2	2	2	2	2	2	2	2	2
OG0000135	430998.XP_007679405.1	0	1612	COG0466@1|root,KOG2004@2759|Eukaryota,38CF0@33154|Opisthokonta,3NXAU@4751|Fungi,3QQPC@4890|Ascomycota,200GS@147541|Dothideomycetes,3MJNP@451867|Dothideomycetidae	4751|Fungi	L	ATP-dependent serine protease that mediates the selective degradation of misfolded, unassembled or oxidatively damaged polypeptides as well as certain short-lived regulatory proteins in the mitochondrial matrix. May also have a chaperone function in the assembly of inner membrane protein complexes. Participates in the regulation of mitochondrial gene expression and in the maintenance of the integ…	PIM1	GO:0000166,GO:0003674,GO:0003824,GO:0004175,GO:0004176,GO:0004252,GO:0005488,GO:0005524,GO:0005575,GO:0005622,GO:0005623,GO:0005737,GO:0005739,GO:0005759,GO:0006508,GO:0006515,GO:0006807,GO:0006996,GO:0007005,GO:0008144,GO:0008150,GO:0008152,GO:0008233,GO:0008236,GO:0009056,GO:0009057,GO:0009987,GO:0016043,GO:0016462,GO:0016787,GO:0016817,GO:0016818,GO:0016887,GO:0017076,GO:0017111,GO:0017171,GO:…	3.4.21.53	ko:K08675	-	-	-	-	ko00000,ko01000,ko01002,ko03029	-	-	-	AAA,LON_substr_bdg,Lon_C	IPR029069	HotDog domain superfamily	2	2	2	2	2	2	2	2	2	2	4	2	4	2	2	2	2	2	2	2	2	2	2	2	2	2	2
OG0000135	430998.XP_007679405.1	0	1612	COG0466@1|root,KOG2004@2759|Eukaryota,38CF0@33154|Opisthokonta,3NXAU@4751|Fungi,3QQPC@4890|Ascomycota,200GS@147541|Dothideomycetes,3MJNP@451867|Dothideomycetidae	4751|Fungi	L	ATP-dependent serine protease that mediates the selective degradation of misfolded, unassembled or oxidatively damaged polypeptides as well as certain short-lived regulatory proteins in the mitochondrial matrix. May also have a chaperone function in the assembly of inner membrane protein complexes. Participates in the regulation of mitochondrial gene expression and in the maintenance of the integ…	PIM1	GO:0000166,GO:0003674,GO:0003824,GO:0004175,GO:0004176,GO:0004252,GO:0005488,GO:0005524,GO:0005575,GO:0005622,GO:0005623,GO:0005737,GO:0005739,GO:0005759,GO:0006508,GO:0006515,GO:0006807,GO:0006996,GO:0007005,GO:0008144,GO:0008150,GO:0008152,GO:0008233,GO:0008236,GO:0009056,GO:0009057,GO:0009987,GO:0016043,GO:0016462,GO:0016787,GO:0016817,GO:0016818,GO:0016887,GO:0017076,GO:0017111,GO:0017171,GO:…	3.4.21.53	ko:K08675	-	-	-	-	ko00000,ko01000,ko01002,ko03029	-	-	-	AAA,LON_substr_bdg,Lon_C	IPR029069	HotDog domain superfamily	2	2	2	2	2	2	2	2	2	2	4	2	4	2	2	2	2	2	2	2	2	2	2	2	2	2	2
OG0000135	430998.XP_007679405.1	0	1612	COG0466@1|root,KOG2004@2759|Eukaryota,38CF0@33154|Opisthokonta,3NXAU@4751|Fungi,3QQPC@4890|Ascomycota,200GS@147541|Dothideomycetes,3MJNP@451867|Dothideomycetidae	4751|Fungi	L	ATP-dependent serine protease that mediates the selective degradation of misfolded, unassembled or oxidatively damaged polypeptides as well as certain short-lived regulatory proteins in the mitochondrial matrix. May also have a chaperone function in the assembly of inner membrane protein complexes. Participates in the regulation of mitochondrial gene expression and in the maintenance of the integ…	PIM1	GO:0000166,GO:0003674,GO:0003824,GO:0004175,GO:0004176,GO:0004252,GO:0005488,GO:0005524,GO:0005575,GO:0005622,GO:0005623,GO:0005737,GO:0005739,GO:0005759,GO:0006508,GO:0006515,GO:0006807,GO:0006996,GO:0007005,GO:0008144,GO:0008150,GO:0008152,GO:0008233,GO:0008236,GO:0009056,GO:0009057,GO:0009987,GO:0016043,GO:0016462,GO:0016787,GO:0016817,GO:0016818,GO:0016887,GO:0017076,GO:0017111,GO:0017171,GO:…	3.4.21.53	ko:K08675	-	-	-	-	ko00000,ko01000,ko01002,ko03029	-	-	-	AAA,LON_substr_bdg,Lon_C	IPR020568	Ribosomal protein uS5 domain 2-type superfamily	2	2	2	2	2	2	2	2	2	2	4	2	4	2	2	2	2	2	2	2	2	2	2	2	2	2	2
OG0000135	430998.XP_007679405.1	0	1612	COG0466@1|root,KOG2004@2759|Eukaryota,38CF0@33154|Opisthokonta,3NXAU@4751|Fungi,3QQPC@4890|Ascomycota,200GS@147541|Dothideomycetes,3MJNP@451867|Dothideomycetidae	4751|Fungi	L	ATP-dependent serine protease that mediates the selective degradation of misfolded, unassembled or oxidatively damaged polypeptides as well as certain short-lived regulatory proteins in the mitochondrial matrix. May also have a chaperone function in the assembly of inner membrane protein complexes. Participates in the regulation of mitochondrial gene expression and in the maintenance of the integ…	PIM1	GO:0000166,GO:0003674,GO:0003824,GO:0004175,GO:0004176,GO:0004252,GO:0005488,GO:0005524,GO:0005575,GO:0005622,GO:0005623,GO:0005737,GO:0005739,GO:0005759,GO:0006508,GO:0006515,GO:0006807,GO:0006996,GO:0007005,GO:0008144,GO:0008150,GO:0008152,GO:0008233,GO:0008236,GO:0009056,GO:0009057,GO:0009987,GO:0016043,GO:0016462,GO:0016787,GO:0016817,GO:0016818,GO:0016887,GO:0017076,GO:0017111,GO:0017171,GO:…	3.4.21.53	ko:K08675	-	-	-	-	ko00000,ko01000,ko01002,ko03029	-	-	-	AAA,LON_substr_bdg,Lon_C	IPR015947	PUA-like superfamily	2	2	2	2	2	2	2	2	2	2	4	2	4	2	2	2	2	2	2	2	2	2	2	2	2	2	2
OG0000171	1047171.Mycgr3P60951	2.53e-260	747	COG1362@1|root,KOG2596@2759|Eukaryota,38CES@33154|Opisthokonta,3NWB8@4751|Fungi,3QKN2@4890|Ascomycota,1ZYQT@147541|Dothideomycetes,3MGCH@451867|Dothideomycetidae	4751|Fungi	E	Belongs to the peptidase M18 family	-	GO:0000322,GO:0000323,GO:0000324,GO:0000328,GO:0003674,GO:0003824,GO:0004177,GO:0005575,GO:0005576,GO:0005622,GO:0005623,GO:0005737,GO:0005773,GO:0005775,GO:0006457,GO:0006508,GO:0006518,GO:0006807,GO:0008150,GO:0008152,GO:0008233,GO:0008235,GO:0008237,GO:0008238,GO:0009987,GO:0016787,GO:0019538,GO:0031974,GO:0034641,GO:0043170,GO:0043226,GO:0043227,GO:0043229,GO:0043231,GO:0043233,GO:0043603,GO:…	3.4.11.21	ko:K01267	-	-	-	-	ko00000,ko01000,ko01002,ko04131	-	-	-	Peptidase_M18	IPR001948	Peptidase M18	1	3	3	2	3	3	2	2	2	2	4	2	4	1	1	2	2	1	1	1	1	1	2	2	2	2	2
OG0000202	63418.F2PN26	6.36e-184	512	KOG1415@1|root,KOG1415@2759|Eukaryota,3AEY8@33154|Opisthokonta,3PAXZ@4751|Fungi,3QU62@4890|Ascomycota,20BWD@147545|Eurotiomycetes,3B2RT@33183|Onygenales,3FUP2@34384|Arthrodermataceae	4751|Fungi	O	ubiquitin	-	-	3.4.19.12	ko:K05609	-	-	-	-	ko00000,ko01000,ko01002,ko04121	-	-	-	Peptidase_C12	IPR038765	Papain-like cysteine peptidase superfamily	2	1	1	1	1	1	1	2	2	2	3	2	3	1	1	2	2	1	1	1	1	1	2	2	2	2	2
OG0000202	63418.F2PN26	6.36e-184	512	KOG1415@1|root,KOG1415@2759|Eukaryota,3AEY8@33154|Opisthokonta,3PAXZ@4751|Fungi,3QU62@4890|Ascomycota,20BWD@147545|Eurotiomycetes,3B2RT@33183|Onygenales,3FUP2@34384|Arthrodermataceae	4751|Fungi	O	ubiquitin	-	-	3.4.19.12	ko:K05609	-	-	-	-	ko00000,ko01000,ko01002,ko04121	-	-	-	Peptidase_C12	IPR001578	Peptidase C12, ubiquitin carboxyl-terminal hydrolase	2	1	1	1	1	1	1	2	2	2	3	2	3	1	1	2	2	1	1	1	1	1	2	2	2	2	2
OG0000272	4909.A0A099NXQ2	0	1263	COG5560@1|root,KOG1870@2759|Eukaryota,39JAB@33154|Opisthokonta,3Q3MD@4751|Fungi,3QN3B@4890|Ascomycota,3RT3D@4891|Saccharomycetes	4751|Fungi	O	Belongs to the peptidase C19 family	-	GO:0003674,GO:0003824,GO:0004843,GO:0005575,GO:0005622,GO:0005623,GO:0005634,GO:0005730,GO:0006325,GO:0006342,GO:0006348,GO:0006355,GO:0006464,GO:0006508,GO:0006807,GO:0006996,GO:0008150,GO:0008152,GO:0008233,GO:0008234,GO:0009889,GO:0009890,GO:0009892,GO:0009987,GO:0010468,GO:0010556,GO:0010558,GO:0010605,GO:0010629,GO:0016043,GO:0016458,GO:0016569,GO:0016570,GO:0016578,GO:0016579,GO:0016787,GO:…	3.4.19.12	ko:K11873	-	-	-	-	ko00000,ko01000,ko01002,ko04121	-	-	-	UCH	IPR038765	Papain-like cysteine peptidase superfamily	2	2	2	2	2	2	3	1	1	1	2	1	2	2	2	4	5	2	2	2	2	2	1	1	1	1	1
OG0000272	4909.A0A099NXQ2	0	1263	COG5560@1|root,KOG1870@2759|Eukaryota,39JAB@33154|Opisthokonta,3Q3MD@4751|Fungi,3QN3B@4890|Ascomycota,3RT3D@4891|Saccharomycetes	4751|Fungi	O	Belongs to the peptidase C19 family	-	GO:0003674,GO:0003824,GO:0004843,GO:0005575,GO:0005622,GO:0005623,GO:0005634,GO:0005730,GO:0006325,GO:0006342,GO:0006348,GO:0006355,GO:0006464,GO:0006508,GO:0006807,GO:0006996,GO:0008150,GO:0008152,GO:0008233,GO:0008234,GO:0009889,GO:0009890,GO:0009892,GO:0009987,GO:0010468,GO:0010556,GO:0010558,GO:0010605,GO:0010629,GO:0016043,GO:0016458,GO:0016569,GO:0016570,GO:0016578,GO:0016579,GO:0016787,GO:…	3.4.19.12	ko:K11873	-	-	-	-	ko00000,ko01000,ko01002,ko04121	-	-	-	UCH	IPR050164	Ubiquitin carboxyl-terminal hydrolases	2	2	2	2	2	2	3	1	1	1	2	1	2	2	2	4	5	2	2	2	2	2	1	1	1	1	1
OG0000277	63405.XP_002845577.1	0	1212	COG4934@1|root,2QR6D@2759|Eukaryota,38GAV@33154|Opisthokonta,3NY9U@4751|Fungi,3QMQ1@4890|Ascomycota,20B7N@147545|Eurotiomycetes,3AZYQ@33183|Onygenales,3FUVM@34384|Arthrodermataceae	4751|Fungi	O	Secreted tripeptidyl-peptidase which degrades proteins at acidic pHs and is involved in virulence	SED4	-	3.4.14.9	ko:K01279	ko04142,map04142	-	-	-	ko00000,ko00001,ko01000,ko01002,ko03110,ko04147	-	-	-	Peptidase_S8,Pro-kuma_activ	IPR036852	Peptidase S8/S53 domain superfamily	0	0	0	0	0	0	0	2	2	2	2	1	2	1	1	2	2	0	0	0	0	0	3	3	3	3	3
OG0000277	63405.XP_002845577.1	0	1212	COG4934@1|root,2QR6D@2759|Eukaryota,38GAV@33154|Opisthokonta,3NY9U@4751|Fungi,3QMQ1@4890|Ascomycota,20B7N@147545|Eurotiomycetes,3AZYQ@33183|Onygenales,3FUVM@34384|Arthrodermataceae	4751|Fungi	O	Secreted tripeptidyl-peptidase which degrades proteins at acidic pHs and is involved in virulence	SED4	-	3.4.14.9	ko:K01279	ko04142,map04142	-	-	-	ko00000,ko00001,ko01000,ko01002,ko03110,ko04147	-	-	-	Peptidase_S8,Pro-kuma_activ	IPR050819	Tripeptidyl-peptidase I and related peptidases	0	0	0	0	0	0	0	2	2	2	2	1	2	1	1	2	2	0	0	0	0	0	3	3	3	3	3
OG0000290	82508.K1WAW2	4.02e-256	733	KOG2605@1|root,KOG2605@2759|Eukaryota,39JFE@33154|Opisthokonta,3P1DA@4751|Fungi,3V147@5204|Basidiomycota,3VF55@5234|Tremellales	4751|Fungi	OT	OTU-like cysteine protease	-	-	3.4.19.12	ko:K12655,ko:K13717	ko04622,map04622	-	-	-	ko00000,ko00001,ko01000,ko01002,ko04121	-	-	-	OTU	IPR052786	Outer_spore_wall_assembly	1	1	1	1	0	0	1	2	2	2	3	2	3	1	1	0	1	1	1	1	1	1	2	2	2	2	2
OG0000290	82508.K1WAW2	4.02e-256	733	KOG2605@1|root,KOG2605@2759|Eukaryota,39JFE@33154|Opisthokonta,3P1DA@4751|Fungi,3V147@5204|Basidiomycota,3VF55@5234|Tremellales	4751|Fungi	OT	OTU-like cysteine protease	-	-	3.4.19.12	ko:K12655,ko:K13717	ko04622,map04622	-	-	-	ko00000,ko00001,ko01000,ko01002,ko04121	-	-	-	OTU	IPR038765	Papain-like cysteine peptidase superfamily	1	1	1	1	0	0	1	2	2	2	3	2	3	1	1	0	1	1	1	1	1	1	2	2	2	2	2
OG0000299	430998.XP_007675756.1	1.71e-235	679	COG0024@1|root,KOG2775@2759|Eukaryota,38BDD@33154|Opisthokonta,3NUPF@4751|Fungi,3QKTY@4890|Ascomycota,1ZYFY@147541|Dothideomycetes,3MK71@451867|Dothideomycetidae	4751|Fungi	J	Cotranslationally removes the N-terminal methionine from nascent proteins. The N-terminal methionine is often cleaved when the second residue in the primary sequence is small and uncharged (Met-Ala-, Cys, Gly, Pro, Ser, Thr, or Val)	MAP2	GO:0003674,GO:0003824,GO:0004177,GO:0005575,GO:0005622,GO:0005623,GO:0005634,GO:0005737,GO:0006464,GO:0006508,GO:0006807,GO:0008150,GO:0008152,GO:0008233,GO:0008235,GO:0008237,GO:0008238,GO:0009987,GO:0010467,GO:0016485,GO:0016787,GO:0019538,GO:0035551,GO:0036211,GO:0043170,GO:0043226,GO:0043227,GO:0043229,GO:0043231,GO:0043412,GO:0044237,GO:0044238,GO:0044260,GO:0044267,GO:0044424,GO:0044464,GO:…	3.4.11.18	ko:K01265	-	-	-	-	ko00000,ko01000,ko01002	-	-	-	Peptidase_M24	IPR036005	Creatinase/aminopeptidase-like	1	1	1	1	1	1	1	1	1	2	2	2	2	1	1	2	2	1	1	1	1	1	2	2	2	2	2
OG0000299	430998.XP_007675756.1	1.71e-235	679	COG0024@1|root,KOG2775@2759|Eukaryota,38BDD@33154|Opisthokonta,3NUPF@4751|Fungi,3QKTY@4890|Ascomycota,1ZYFY@147541|Dothideomycetes,3MK71@451867|Dothideomycetidae	4751|Fungi	J	Cotranslationally removes the N-terminal methionine from nascent proteins. The N-terminal methionine is often cleaved when the second residue in the primary sequence is small and uncharged (Met-Ala-, Cys, Gly, Pro, Ser, Thr, or Val)	MAP2	GO:0003674,GO:0003824,GO:0004177,GO:0005575,GO:0005622,GO:0005623,GO:0005634,GO:0005737,GO:0006464,GO:0006508,GO:0006807,GO:0008150,GO:0008152,GO:0008233,GO:0008235,GO:0008237,GO:0008238,GO:0009987,GO:0010467,GO:0016485,GO:0016787,GO:0019538,GO:0035551,GO:0036211,GO:0043170,GO:0043226,GO:0043227,GO:0043229,GO:0043231,GO:0043412,GO:0044237,GO:0044238,GO:0044260,GO:0044267,GO:0044424,GO:0044464,GO:…	3.4.11.18	ko:K01265	-	-	-	-	ko00000,ko01000,ko01002	-	-	-	Peptidase_M24	IPR036390	Winged helix DNA-binding domain superfamily	1	1	1	1	1	1	1	1	1	2	2	2	2	1	1	2	2	1	1	1	1	1	2	2	2	2	2
OG0000299	430998.XP_007675756.1	1.71e-235	679	COG0024@1|root,KOG2775@2759|Eukaryota,38BDD@33154|Opisthokonta,3NUPF@4751|Fungi,3QKTY@4890|Ascomycota,1ZYFY@147541|Dothideomycetes,3MK71@451867|Dothideomycetidae	4751|Fungi	J	Cotranslationally removes the N-terminal methionine from nascent proteins. The N-terminal methionine is often cleaved when the second residue in the primary sequence is small and uncharged (Met-Ala-, Cys, Gly, Pro, Ser, Thr, or Val)	MAP2	GO:0003674,GO:0003824,GO:0004177,GO:0005575,GO:0005622,GO:0005623,GO:0005634,GO:0005737,GO:0006464,GO:0006508,GO:0006807,GO:0008150,GO:0008152,GO:0008233,GO:0008235,GO:0008237,GO:0008238,GO:0009987,GO:0010467,GO:0016485,GO:0016787,GO:0019538,GO:0035551,GO:0036211,GO:0043170,GO:0043226,GO:0043227,GO:0043229,GO:0043231,GO:0043412,GO:0044237,GO:0044238,GO:0044260,GO:0044267,GO:0044424,GO:0044464,GO:…	3.4.11.18	ko:K01265	-	-	-	-	ko00000,ko01000,ko01002	-	-	-	Peptidase_M24	IPR036188	FAD/NAD(P)-binding domain superfamily	1	1	1	1	1	1	1	1	1	2	2	2	2	1	1	2	2	1	1	1	1	1	2	2	2	2	2
OG0000299	430998.XP_007675756.1	1.71e-235	679	COG0024@1|root,KOG2775@2759|Eukaryota,38BDD@33154|Opisthokonta,3NUPF@4751|Fungi,3QKTY@4890|Ascomycota,1ZYFY@147541|Dothideomycetes,3MK71@451867|Dothideomycetidae	4751|Fungi	J	Cotranslationally removes the N-terminal methionine from nascent proteins. The N-terminal methionine is often cleaved when the second residue in the primary sequence is small and uncharged (Met-Ala-, Cys, Gly, Pro, Ser, Thr, or Val)	MAP2	GO:0003674,GO:0003824,GO:0004177,GO:0005575,GO:0005622,GO:0005623,GO:0005634,GO:0005737,GO:0006464,GO:0006508,GO:0006807,GO:0008150,GO:0008152,GO:0008233,GO:0008235,GO:0008237,GO:0008238,GO:0009987,GO:0010467,GO:0016485,GO:0016787,GO:0019538,GO:0035551,GO:0036211,GO:0043170,GO:0043226,GO:0043227,GO:0043229,GO:0043231,GO:0043412,GO:0044237,GO:0044238,GO:0044260,GO:0044267,GO:0044424,GO:0044464,GO:…	3.4.11.18	ko:K01265	-	-	-	-	ko00000,ko01000,ko01002	-	-	-	Peptidase_M24	IPR050247	Methionine Aminopeptidase Type 2	1	1	1	1	1	1	1	1	1	2	2	2	2	1	1	2	2	1	1	1	1	1	2	2	2	2	2
OG0000299	430998.XP_007675756.1	1.71e-235	679	COG0024@1|root,KOG2775@2759|Eukaryota,38BDD@33154|Opisthokonta,3NUPF@4751|Fungi,3QKTY@4890|Ascomycota,1ZYFY@147541|Dothideomycetes,3MK71@451867|Dothideomycetidae	4751|Fungi	J	Cotranslationally removes the N-terminal methionine from nascent proteins. The N-terminal methionine is often cleaved when the second residue in the primary sequence is small and uncharged (Met-Ala-, Cys, Gly, Pro, Ser, Thr, or Val)	MAP2	GO:0003674,GO:0003824,GO:0004177,GO:0005575,GO:0005622,GO:0005623,GO:0005634,GO:0005737,GO:0006464,GO:0006508,GO:0006807,GO:0008150,GO:0008152,GO:0008233,GO:0008235,GO:0008237,GO:0008238,GO:0009987,GO:0010467,GO:0016485,GO:0016787,GO:0019538,GO:0035551,GO:0036211,GO:0043170,GO:0043226,GO:0043227,GO:0043229,GO:0043231,GO:0043412,GO:0044237,GO:0044238,GO:0044260,GO:0044267,GO:0044424,GO:0044464,GO:…	3.4.11.18	ko:K01265	-	-	-	-	ko00000,ko01000,ko01002	-	-	-	Peptidase_M24	IPR002468	Peptidase M24A, methionine aminopeptidase, subfamily 2	1	1	1	1	1	1	1	1	1	2	2	2	2	1	1	2	2	1	1	1	1	1	2	2	2	2	2
OG0000361	4909.A0A099P560	0	1667	COG1404@1|root,COG3579@1|root,KOG3525@2759|Eukaryota,KOG4128@2759|Eukaryota,38C1N@33154|Opisthokonta,3NV4P@4751|Fungi,3QNAI@4890|Ascomycota,3RRZV@4891|Saccharomycetes	4751|Fungi	O	Belongs to the peptidase S8 family	KEX2	GO:0000139,GO:0000322,GO:0000323,GO:0000324,GO:0003674,GO:0003824,GO:0004175,GO:0004252,GO:0004857,GO:0004866,GO:0004867,GO:0005488,GO:0005515,GO:0005575,GO:0005622,GO:0005623,GO:0005737,GO:0005773,GO:0005794,GO:0005802,GO:0006508,GO:0006807,GO:0007323,GO:0008150,GO:0008152,GO:0008233,GO:0008236,GO:0009892,GO:0009986,GO:0010466,GO:0010467,GO:0010605,GO:0010951,GO:0012505,GO:0016020,GO:0016485,GO:…	3.4.21.61	ko:K01341	-	-	-	-	ko00000,ko01000,ko01002,ko03110	-	-	-	P_proprotein,Peptidase_S8	IPR008979	Galactose-binding-like domain superfamily	2	1	1	1	1	1	1	1	1	1	2	1	2	1	1	2	2	1	1	1	1	1	1	1	1	1	1
OG0000361	4909.A0A099P560	0	1667	COG1404@1|root,COG3579@1|root,KOG3525@2759|Eukaryota,KOG4128@2759|Eukaryota,38C1N@33154|Opisthokonta,3NV4P@4751|Fungi,3QNAI@4890|Ascomycota,3RRZV@4891|Saccharomycetes	4751|Fungi	O	Belongs to the peptidase S8 family	KEX2	GO:0000139,GO:0000322,GO:0000323,GO:0000324,GO:0003674,GO:0003824,GO:0004175,GO:0004252,GO:0004857,GO:0004866,GO:0004867,GO:0005488,GO:0005515,GO:0005575,GO:0005622,GO:0005623,GO:0005737,GO:0005773,GO:0005794,GO:0005802,GO:0006508,GO:0006807,GO:0007323,GO:0008150,GO:0008152,GO:0008233,GO:0008236,GO:0009892,GO:0009986,GO:0010466,GO:0010467,GO:0010605,GO:0010951,GO:0012505,GO:0016020,GO:0016485,GO:…	3.4.21.61	ko:K01341	-	-	-	-	ko00000,ko01000,ko01002,ko03110	-	-	-	P_proprotein,Peptidase_S8	IPR036852	Peptidase S8/S53 domain superfamily	2	1	1	1	1	1	1	1	1	1	2	1	2	1	1	2	2	1	1	1	1	1	1	1	1	1	1
OG0000378	5478.XP_446535.1	0	1513	COG0006@1|root,KOG2413@2759|Eukaryota,38B6V@33154|Opisthokonta,3NU3T@4751|Fungi,3QM3F@4890|Ascomycota,3RSEP@4891|Saccharomycetes,3RYK8@4893|Saccharomycetaceae	4751|Fungi	E	Belongs to the peptidase M24B family	AMPP	GO:0000122,GO:0006355,GO:0006357,GO:0008150,GO:0009889,GO:0009890,GO:0009892,GO:0009987,GO:0010035,GO:0010038,GO:0010039,GO:0010468,GO:0010556,GO:0010558,GO:0010605,GO:0010629,GO:0019219,GO:0019222,GO:0031323,GO:0031324,GO:0031326,GO:0031327,GO:0034395,GO:0034396,GO:0042221,GO:0045892,GO:0045934,GO:0048519,GO:0048523,GO:0050789,GO:0050794,GO:0050896,GO:0051171,GO:0051172,GO:0051252,GO:0051253,GO:…	3.4.11.9	ko:K01262	-	-	-	-	ko00000,ko01000,ko01002	-	-	-	Creatinase_N,Creatinase_N_2,Peptidase_M24,Peptidase_M24_C	IPR050422	Xaa-Pro aminopeptidase P	1	2	1	2	2	2	3	1	1	1	2	1	2	2	2	3	3	2	2	2	2	2	1	1	1	1	1
OG0000378	5478.XP_446535.1	0	1513	COG0006@1|root,KOG2413@2759|Eukaryota,38B6V@33154|Opisthokonta,3NU3T@4751|Fungi,3QM3F@4890|Ascomycota,3RSEP@4891|Saccharomycetes,3RYK8@4893|Saccharomycetaceae	4751|Fungi	E	Belongs to the peptidase M24B family	AMPP	GO:0000122,GO:0006355,GO:0006357,GO:0008150,GO:0009889,GO:0009890,GO:0009892,GO:0009987,GO:0010035,GO:0010038,GO:0010039,GO:0010468,GO:0010556,GO:0010558,GO:0010605,GO:0010629,GO:0019219,GO:0019222,GO:0031323,GO:0031324,GO:0031326,GO:0031327,GO:0034395,GO:0034396,GO:0042221,GO:0045892,GO:0045934,GO:0048519,GO:0048523,GO:0050789,GO:0050794,GO:0050896,GO:0051171,GO:0051172,GO:0051252,GO:0051253,GO:…	3.4.11.9	ko:K01262	-	-	-	-	ko00000,ko01000,ko01002	-	-	-	Creatinase_N,Creatinase_N_2,Peptidase_M24,Peptidase_M24_C	IPR029149	Creatinase/Aminopeptidase P/Spt16, N-terminal	1	2	1	2	2	2	3	1	1	1	2	1	2	2	2	3	3	2	2	2	2	2	1	1	1	1	1
OG0000378	5478.XP_446535.1	0	1513	COG0006@1|root,KOG2413@2759|Eukaryota,38B6V@33154|Opisthokonta,3NU3T@4751|Fungi,3QM3F@4890|Ascomycota,3RSEP@4891|Saccharomycetes,3RYK8@4893|Saccharomycetaceae	4751|Fungi	E	Belongs to the peptidase M24B family	AMPP	GO:0000122,GO:0006355,GO:0006357,GO:0008150,GO:0009889,GO:0009890,GO:0009892,GO:0009987,GO:0010035,GO:0010038,GO:0010039,GO:0010468,GO:0010556,GO:0010558,GO:0010605,GO:0010629,GO:0019219,GO:0019222,GO:0031323,GO:0031324,GO:0031326,GO:0031327,GO:0034395,GO:0034396,GO:0042221,GO:0045892,GO:0045934,GO:0048519,GO:0048523,GO:0050789,GO:0050794,GO:0050896,GO:0051171,GO:0051172,GO:0051252,GO:0051253,GO:…	3.4.11.9	ko:K01262	-	-	-	-	ko00000,ko01000,ko01002	-	-	-	Creatinase_N,Creatinase_N_2,Peptidase_M24,Peptidase_M24_C	IPR036005	Creatinase/aminopeptidase-like	1	2	1	2	2	2	3	1	1	1	2	1	2	2	2	3	3	2	2	2	2	2	1	1	1	1	1
OG0000467	104355.XP_007860870.1	3.78e-147	490	KOG3691@1|root,KOG3691@2759|Eukaryota,38DB8@33154|Opisthokonta,3NURI@4751|Fungi,3UZE1@5204|Basidiomycota,227JX@155619|Agaricomycetes,3H4E5@355688|Agaricomycetes incertae sedis	4751|Fungi	U	Sec8 exocyst complex component specific domain	SEC8	GO:0000003,GO:0000131,GO:0000145,GO:0000920,GO:0000922,GO:0003006,GO:0005575,GO:0005622,GO:0005623,GO:0005628,GO:0005737,GO:0005819,GO:0005856,GO:0005933,GO:0005934,GO:0005935,GO:0005937,GO:0005938,GO:0006605,GO:0006612,GO:0006810,GO:0006886,GO:0006887,GO:0006892,GO:0006893,GO:0006897,GO:0006903,GO:0006996,GO:0007029,GO:0007030,GO:0007049,GO:0008104,GO:0008150,GO:0009653,GO:0009987,GO:0010256,GO:…	3.4.11.9	ko:K01262,ko:K06111	-	-	-	-	ko00000,ko01000,ko01002,ko04131	-	-	-	Sec8_exocyst	IPR039682	Exocyst complex component Sec8/EXOC4	1	1	1	1	1	1	2	2	2	2	2	1	2	0	1	3	2	1	1	1	1	1	1	2	1	1	2
OG0000485	5478.XP_445129.1	0	928	COG1404@1|root,KOG1153@2759|Eukaryota,38H6S@33154|Opisthokonta,3NUCW@4751|Fungi,3QK5M@4890|Ascomycota,3RRJT@4891|Saccharomycetes,3S0PF@4893|Saccharomycetaceae	4751|Fungi	O	Belongs to the peptidase S8 family	SUB8	GO:0000003,GO:0000322,GO:0000323,GO:0000324,GO:0000328,GO:0000746,GO:0000747,GO:0003674,GO:0003824,GO:0004175,GO:0004252,GO:0005488,GO:0005575,GO:0005622,GO:0005623,GO:0005737,GO:0005773,GO:0005775,GO:0006508,GO:0006807,GO:0006914,GO:0006950,GO:0006996,GO:0007033,GO:0007039,GO:0007154,GO:0008150,GO:0008152,GO:0008233,GO:0008236,GO:0009056,GO:0009057,GO:0009267,GO:0009605,GO:0009653,GO:0009987,GO:…	3.4.21.48	ko:K01336	ko04138,map04138	-	-	-	ko00000,ko00001,ko01000,ko01002,ko03110	-	-	-	Inhibitor_I9,Peptidase_S8	IPR050131	Subtilisin-like serine protease	2	2	2	2	2	1	2	1	1	1	2	1	2	1	1	2	2	1	1	1	1	1	1	1	1	1	1
OG0000485	5478.XP_445129.1	0	928	COG1404@1|root,KOG1153@2759|Eukaryota,38H6S@33154|Opisthokonta,3NUCW@4751|Fungi,3QK5M@4890|Ascomycota,3RRJT@4891|Saccharomycetes,3S0PF@4893|Saccharomycetaceae	4751|Fungi	O	Belongs to the peptidase S8 family	SUB8	GO:0000003,GO:0000322,GO:0000323,GO:0000324,GO:0000328,GO:0000746,GO:0000747,GO:0003674,GO:0003824,GO:0004175,GO:0004252,GO:0005488,GO:0005575,GO:0005622,GO:0005623,GO:0005737,GO:0005773,GO:0005775,GO:0006508,GO:0006807,GO:0006914,GO:0006950,GO:0006996,GO:0007033,GO:0007039,GO:0007154,GO:0008150,GO:0008152,GO:0008233,GO:0008236,GO:0009056,GO:0009057,GO:0009267,GO:0009605,GO:0009653,GO:0009987,GO:…	3.4.21.48	ko:K01336	ko04138,map04138	-	-	-	ko00000,ko00001,ko01000,ko01002,ko03110	-	-	-	Inhibitor_I9,Peptidase_S8	IPR036852	Peptidase S8/S53 domain superfamily	2	2	2	2	2	1	2	1	1	1	2	1	2	1	1	2	2	1	1	1	1	1	1	1	1	1	1
OG0000571	82508.K1VFX1	0	1595	COG5077@1|root,KOG1863@2759|Eukaryota,39PGC@33154|Opisthokonta,3NVJH@4751|Fungi,3UZHT@5204|Basidiomycota,3VCSP@5234|Tremellales	4751|Fungi	O	A repeated domain in UCH-protein	UBP2	GO:0003674,GO:0003824,GO:0004843,GO:0005575,GO:0005622,GO:0005623,GO:0005737,GO:0006464,GO:0006508,GO:0006511,GO:0006807,GO:0006950,GO:0006979,GO:0008150,GO:0008152,GO:0008233,GO:0008234,GO:0009056,GO:0009057,GO:0009987,GO:0010992,GO:0016579,GO:0016787,GO:0019538,GO:0019725,GO:0019783,GO:0019941,GO:0030163,GO:0033554,GO:0034599,GO:0036211,GO:0036459,GO:0042221,GO:0042592,GO:0043162,GO:0043170,GO:…	3.4.19.12	ko:K11849	ko04657,map04657	-	-	-	ko00000,ko00001,ko01000,ko01002,ko04121	-	-	-	RPT,UCH	IPR038765	Papain-like cysteine peptidase superfamily	0	1	1	1	1	1	2	2	1	2	3	1	2	2	1	2	1	1	1	1	1	1	1	2	1	1	1
OG0000571	82508.K1VFX1	0	1595	COG5077@1|root,KOG1863@2759|Eukaryota,39PGC@33154|Opisthokonta,3NVJH@4751|Fungi,3UZHT@5204|Basidiomycota,3VCSP@5234|Tremellales	4751|Fungi	O	A repeated domain in UCH-protein	UBP2	GO:0003674,GO:0003824,GO:0004843,GO:0005575,GO:0005622,GO:0005623,GO:0005737,GO:0006464,GO:0006508,GO:0006511,GO:0006807,GO:0006950,GO:0006979,GO:0008150,GO:0008152,GO:0008233,GO:0008234,GO:0009056,GO:0009057,GO:0009987,GO:0010992,GO:0016579,GO:0016787,GO:0019538,GO:0019725,GO:0019783,GO:0019941,GO:0030163,GO:0033554,GO:0034599,GO:0036211,GO:0036459,GO:0042221,GO:0042592,GO:0043162,GO:0043170,GO:…	3.4.19.12	ko:K11849	ko04657,map04657	-	-	-	ko00000,ko00001,ko01000,ko01002,ko04121	-	-	-	RPT,UCH	IPR044635	Ubiquitin carboxyl-terminal hydrolase 14-like	0	1	1	1	1	1	2	2	1	2	3	1	2	2	1	2	1	1	1	1	1	1	1	2	1	1	1
OG0000587	5551.XP_003232985.1	0	4072	COG5155@1|root,KOG1849@2759|Eukaryota,39UH7@33154|Opisthokonta,3NYNA@4751|Fungi,3QN2X@4890|Ascomycota,20ESG@147545|Eurotiomycetes,3B2SB@33183|Onygenales,3FTP3@34384|Arthrodermataceae	4751|Fungi	D	Peptidase family C50	ESP1	GO:0000003,GO:0000070,GO:0000278,GO:0000280,GO:0000819,GO:0003674,GO:0003824,GO:0004175,GO:0004197,GO:0005575,GO:0005622,GO:0005623,GO:0005634,GO:0005737,GO:0005739,GO:0005815,GO:0005816,GO:0005819,GO:0005856,GO:0006508,GO:0006807,GO:0006915,GO:0006950,GO:0006974,GO:0006996,GO:0007049,GO:0007059,GO:0007088,GO:0007096,GO:0007346,GO:0008150,GO:0008152,GO:0008219,GO:0008233,GO:0008234,GO:0009892,GO:…	3.4.22.49	ko:K02365	ko04110,ko04111,ko04113,ko04114,map04110,map04111,map04113,map04114	-	-	-	ko00000,ko00001,ko01000,ko01002,ko03036	-	-	-	Peptidase_C50	IPR005314	Peptidase C50, separase	3	1	2	1	1	1	1	1	1	1	2	1	2	3	1	3	2	1	1	1	1	1	1	1	1	1	2
OG0000599	430998.XP_007674026.1	1.05e-289	798	COG0612@1|root,KOG0960@2759|Eukaryota,38CT4@33154|Opisthokonta,3NU8R@4751|Fungi,3QKVR@4890|Ascomycota,1ZX9R@147541|Dothideomycetes,3MHMQ@451867|Dothideomycetidae	4751|Fungi	O	Belongs to the peptidase M16 family	MAS1	GO:0003674,GO:0003824,GO:0004175,GO:0004222,GO:0005488,GO:0005575,GO:0005622,GO:0005623,GO:0005737,GO:0005739,GO:0005740,GO:0005743,GO:0005746,GO:0005750,GO:0005759,GO:0006091,GO:0006119,GO:0006122,GO:0006139,GO:0006163,GO:0006508,GO:0006605,GO:0006626,GO:0006627,GO:0006725,GO:0006753,GO:0006793,GO:0006796,GO:0006807,GO:0006810,GO:0006839,GO:0006886,GO:0006996,GO:0007005,GO:0008104,GO:0008150,GO:…	3.4.24.64	ko:K17732	-	-	-	-	ko00000,ko01000,ko01002,ko03029	-	-	-	Peptidase_M16,Peptidase_M16_C	IPR050361	Mitochondrial Processing Peptidase/Ubiquinol-cytochrome c Reductase Complex	1	2	1	2	2	2	2	1	1	1	2	1	2	1	1	1	1	1	1	1	1	1	1	1	1	1	1
OG0000599	430998.XP_007674026.1	1.05e-289	798	COG0612@1|root,KOG0960@2759|Eukaryota,38CT4@33154|Opisthokonta,3NU8R@4751|Fungi,3QKVR@4890|Ascomycota,1ZX9R@147541|Dothideomycetes,3MHMQ@451867|Dothideomycetidae	4751|Fungi	O	Belongs to the peptidase M16 family	MAS1	GO:0003674,GO:0003824,GO:0004175,GO:0004222,GO:0005488,GO:0005575,GO:0005622,GO:0005623,GO:0005737,GO:0005739,GO:0005740,GO:0005743,GO:0005746,GO:0005750,GO:0005759,GO:0006091,GO:0006119,GO:0006122,GO:0006139,GO:0006163,GO:0006508,GO:0006605,GO:0006626,GO:0006627,GO:0006725,GO:0006753,GO:0006793,GO:0006796,GO:0006807,GO:0006810,GO:0006839,GO:0006886,GO:0006996,GO:0007005,GO:0008104,GO:0008150,GO:…	3.4.24.64	ko:K17732	-	-	-	-	ko00000,ko01000,ko01002,ko03029	-	-	-	Peptidase_M16,Peptidase_M16_C	IPR011249	Metalloenzyme, LuxS/M16 peptidase-like	1	2	1	2	2	2	2	1	1	1	2	1	2	1	1	1	1	1	1	1	1	1	1	1	1	1	1
OG0000599	430998.XP_007674026.1	1.05e-289	798	COG0612@1|root,KOG0960@2759|Eukaryota,38CT4@33154|Opisthokonta,3NU8R@4751|Fungi,3QKVR@4890|Ascomycota,1ZX9R@147541|Dothideomycetes,3MHMQ@451867|Dothideomycetidae	4751|Fungi	O	Belongs to the peptidase M16 family	MAS1	GO:0003674,GO:0003824,GO:0004175,GO:0004222,GO:0005488,GO:0005575,GO:0005622,GO:0005623,GO:0005737,GO:0005739,GO:0005740,GO:0005743,GO:0005746,GO:0005750,GO:0005759,GO:0006091,GO:0006119,GO:0006122,GO:0006139,GO:0006163,GO:0006508,GO:0006605,GO:0006626,GO:0006627,GO:0006725,GO:0006753,GO:0006793,GO:0006796,GO:0006807,GO:0006810,GO:0006839,GO:0006886,GO:0006996,GO:0007005,GO:0008104,GO:0008150,GO:…	3.4.24.64	ko:K17732	-	-	-	-	ko00000,ko01000,ko01002,ko03029	-	-	-	Peptidase_M16,Peptidase_M16_C	IPR011249	Metalloenzyme, LuxS/M16 peptidase-like	1	2	1	2	2	2	2	1	1	1	2	1	2	1	1	1	1	1	1	1	1	1	1	1	1	1	1
OG0000643	5480.G8BJX7	0	2688	COG5077@1|root,KOG1863@2759|Eukaryota,38CVI@33154|Opisthokonta,3NWAD@4751|Fungi,3QJFE@4890|Ascomycota,3RTDW@4891|Saccharomycetes,479N1@766764|Debaryomycetaceae	4751|Fungi	O	Belongs to the peptidase C19 family	UBP15	GO:0003674,GO:0003824,GO:0004175,GO:0004843,GO:0005575,GO:0005622,GO:0005623,GO:0005634,GO:0005737,GO:0005777,GO:0005783,GO:0005829,GO:0006282,GO:0006464,GO:0006508,GO:0006807,GO:0008150,GO:0008152,GO:0008233,GO:0008234,GO:0009889,GO:0009890,GO:0009892,GO:0009987,GO:0010556,GO:0010558,GO:0010605,GO:0010992,GO:0010995,GO:0012505,GO:0016043,GO:0016579,GO:0016787,GO:0019219,GO:0019222,GO:0019538,GO:…	3.4.19.12	ko:K11838	ko04068,ko05168,ko05169,ko05203,map04068,map05168,map05169,map05203	-	-	-	ko00000,ko00001,ko01000,ko01002,ko04121	-	-	-	MATH,UCH,USP7_C2,USP7_ICP0_bdg	IPR038765	Papain-like cysteine peptidase superfamily	1	1	1	2	1	1	2	1	1	1	2	1	2	1	1	2	2	1	1	1	1	1	1	1	2	1	2
OG0000643	5480.G8BJX7	0	2688	COG5077@1|root,KOG1863@2759|Eukaryota,38CVI@33154|Opisthokonta,3NWAD@4751|Fungi,3QJFE@4890|Ascomycota,3RTDW@4891|Saccharomycetes,479N1@766764|Debaryomycetaceae	4751|Fungi	O	Belongs to the peptidase C19 family	UBP15	GO:0003674,GO:0003824,GO:0004175,GO:0004843,GO:0005575,GO:0005622,GO:0005623,GO:0005634,GO:0005737,GO:0005777,GO:0005783,GO:0005829,GO:0006282,GO:0006464,GO:0006508,GO:0006807,GO:0008150,GO:0008152,GO:0008233,GO:0008234,GO:0009889,GO:0009890,GO:0009892,GO:0009987,GO:0010556,GO:0010558,GO:0010605,GO:0010992,GO:0010995,GO:0012505,GO:0016043,GO:0016579,GO:0016787,GO:0019219,GO:0019222,GO:0019538,GO:…	3.4.19.12	ko:K11838	ko04068,ko05168,ko05169,ko05203,map04068,map05168,map05169,map05203	-	-	-	ko00000,ko00001,ko01000,ko01002,ko04121	-	-	-	MATH,UCH,USP7_C2,USP7_ICP0_bdg	IPR050164	Ubiquitin carboxyl-terminal hydrolases	1	1	1	2	1	1	2	1	1	1	2	1	2	1	1	2	2	1	1	1	1	1	1	1	2	1	2
OG0000714	4909.A0A099P410	0	2158	COG1025@1|root,KOG0959@2759|Eukaryota,38D2B@33154|Opisthokonta,3NUAC@4751|Fungi,3QMK0@4890|Ascomycota,3RT81@4891|Saccharomycetes	4751|Fungi	O	Belongs to the peptidase M16 family	STE23	GO:0003674,GO:0003824,GO:0004175,GO:0004222,GO:0005575,GO:0005622,GO:0005623,GO:0005737,GO:0005739,GO:0006508,GO:0006807,GO:0007323,GO:0008150,GO:0008152,GO:0008233,GO:0008237,GO:0010467,GO:0016020,GO:0016787,GO:0019538,GO:0019898,GO:0031136,GO:0031137,GO:0031139,GO:0043170,GO:0043226,GO:0043227,GO:0043229,GO:0043231,GO:0043900,GO:0043902,GO:0044238,GO:0044424,GO:0044425,GO:0044444,GO:0044464,GO:…	3.4.24.56	ko:K01408	ko05010,map05010	-	-	-	ko00000,ko00001,ko01000,ko01002	-	-	-	Peptidase_M16,Peptidase_M16_C,Peptidase_M16_M	IPR050626	Peptidase M16	3	1	1	1	1	1	2	1	1	1	2	1	2	1	1	2	2	1	1	1	1	1	1	1	1	1	1
OG0000714	4909.A0A099P410	0	2158	COG1025@1|root,KOG0959@2759|Eukaryota,38D2B@33154|Opisthokonta,3NUAC@4751|Fungi,3QMK0@4890|Ascomycota,3RT81@4891|Saccharomycetes	4751|Fungi	O	Belongs to the peptidase M16 family	STE23	GO:0003674,GO:0003824,GO:0004175,GO:0004222,GO:0005575,GO:0005622,GO:0005623,GO:0005737,GO:0005739,GO:0006508,GO:0006807,GO:0007323,GO:0008150,GO:0008152,GO:0008233,GO:0008237,GO:0010467,GO:0016020,GO:0016787,GO:0019538,GO:0019898,GO:0031136,GO:0031137,GO:0031139,GO:0043170,GO:0043226,GO:0043227,GO:0043229,GO:0043231,GO:0043900,GO:0043902,GO:0044238,GO:0044424,GO:0044425,GO:0044444,GO:0044464,GO:…	3.4.24.56	ko:K01408	ko05010,map05010	-	-	-	ko00000,ko00001,ko01000,ko01002	-	-	-	Peptidase_M16,Peptidase_M16_C,Peptidase_M16_M	IPR011249	Metalloenzyme, LuxS/M16 peptidase-like	3	1	1	1	1	1	2	1	1	1	2	1	2	1	1	2	2	1	1	1	1	1	1	1	1	1	1
OG0000714	4909.A0A099P410	0	2158	COG1025@1|root,KOG0959@2759|Eukaryota,38D2B@33154|Opisthokonta,3NUAC@4751|Fungi,3QMK0@4890|Ascomycota,3RT81@4891|Saccharomycetes	4751|Fungi	O	Belongs to the peptidase M16 family	STE23	GO:0003674,GO:0003824,GO:0004175,GO:0004222,GO:0005575,GO:0005622,GO:0005623,GO:0005737,GO:0005739,GO:0006508,GO:0006807,GO:0007323,GO:0008150,GO:0008152,GO:0008233,GO:0008237,GO:0010467,GO:0016020,GO:0016787,GO:0019538,GO:0019898,GO:0031136,GO:0031137,GO:0031139,GO:0043170,GO:0043226,GO:0043227,GO:0043229,GO:0043231,GO:0043900,GO:0043902,GO:0044238,GO:0044424,GO:0044425,GO:0044444,GO:0044464,GO:…	3.4.24.56	ko:K01408	ko05010,map05010	-	-	-	ko00000,ko00001,ko01000,ko01002	-	-	-	Peptidase_M16,Peptidase_M16_C,Peptidase_M16_M	IPR011249	Metalloenzyme, LuxS/M16 peptidase-like	3	1	1	1	1	1	2	1	1	1	2	1	2	1	1	2	2	1	1	1	1	1	1	1	1	1	1
OG0000714	4909.A0A099P410	0	2158	COG1025@1|root,KOG0959@2759|Eukaryota,38D2B@33154|Opisthokonta,3NUAC@4751|Fungi,3QMK0@4890|Ascomycota,3RT81@4891|Saccharomycetes	4751|Fungi	O	Belongs to the peptidase M16 family	STE23	GO:0003674,GO:0003824,GO:0004175,GO:0004222,GO:0005575,GO:0005622,GO:0005623,GO:0005737,GO:0005739,GO:0006508,GO:0006807,GO:0007323,GO:0008150,GO:0008152,GO:0008233,GO:0008237,GO:0010467,GO:0016020,GO:0016787,GO:0019538,GO:0019898,GO:0031136,GO:0031137,GO:0031139,GO:0043170,GO:0043226,GO:0043227,GO:0043229,GO:0043231,GO:0043900,GO:0043902,GO:0044238,GO:0044424,GO:0044425,GO:0044444,GO:0044464,GO:…	3.4.24.56	ko:K01408	ko05010,map05010	-	-	-	ko00000,ko00001,ko01000,ko01002	-	-	-	Peptidase_M16,Peptidase_M16_C,Peptidase_M16_M	IPR011249	Metalloenzyme, LuxS/M16 peptidase-like	3	1	1	1	1	1	2	1	1	1	2	1	2	1	1	2	2	1	1	1	1	1	1	1	1	1	1
OG0000714	4909.A0A099P410	0	2158	COG1025@1|root,KOG0959@2759|Eukaryota,38D2B@33154|Opisthokonta,3NUAC@4751|Fungi,3QMK0@4890|Ascomycota,3RT81@4891|Saccharomycetes	4751|Fungi	O	Belongs to the peptidase M16 family	STE23	GO:0003674,GO:0003824,GO:0004175,GO:0004222,GO:0005575,GO:0005622,GO:0005623,GO:0005737,GO:0005739,GO:0006508,GO:0006807,GO:0007323,GO:0008150,GO:0008152,GO:0008233,GO:0008237,GO:0010467,GO:0016020,GO:0016787,GO:0019538,GO:0019898,GO:0031136,GO:0031137,GO:0031139,GO:0043170,GO:0043226,GO:0043227,GO:0043229,GO:0043231,GO:0043900,GO:0043902,GO:0044238,GO:0044424,GO:0044425,GO:0044444,GO:0044464,GO:…	3.4.24.56	ko:K01408	ko05010,map05010	-	-	-	ko00000,ko00001,ko01000,ko01002	-	-	-	Peptidase_M16,Peptidase_M16_C,Peptidase_M16_M	IPR011249	Metalloenzyme, LuxS/M16 peptidase-like	3	1	1	1	1	1	2	1	1	1	2	1	2	1	1	2	2	1	1	1	1	1	1	1	1	1	1
OG0000727	84751.XP_007880322.1	4.87e-164	489	COG0024@1|root,KOG2776@2759|Eukaryota,38EEE@33154|Opisthokonta,3NXK3@4751|Fungi,3UXZP@5204|Basidiomycota,3MZK1@452284|Ustilaginomycotina	4751|Fungi	J	Metallopeptidase family M24	-	GO:0003674,GO:0003676,GO:0003677,GO:0003824,GO:0004518,GO:0005488,GO:0005575,GO:0005622,GO:0005623,GO:0005634,GO:0006139,GO:0006725,GO:0006807,GO:0008150,GO:0008152,GO:0009987,GO:0016787,GO:0016788,GO:0034641,GO:0043170,GO:0043226,GO:0043227,GO:0043229,GO:0043231,GO:0044237,GO:0044238,GO:0044424,GO:0044464,GO:0046483,GO:0071704,GO:0090304,GO:0090305,GO:0097159,GO:1901360,GO:1901363	3.4.11.18	ko:K01265	-	-	-	-	ko00000,ko01000,ko01002	-	-	-	Peptidase_M24	IPR036390	Winged helix DNA-binding domain superfamily	1	2	1	1	1	1	2	1	1	1	2	1	2	1	1	1	2	1	1	1	1	1	1	1	1	1	1
OG0000727	84751.XP_007880322.1	4.87e-164	489	COG0024@1|root,KOG2776@2759|Eukaryota,38EEE@33154|Opisthokonta,3NXK3@4751|Fungi,3UXZP@5204|Basidiomycota,3MZK1@452284|Ustilaginomycotina	4751|Fungi	J	Metallopeptidase family M24	-	GO:0003674,GO:0003676,GO:0003677,GO:0003824,GO:0004518,GO:0005488,GO:0005575,GO:0005622,GO:0005623,GO:0005634,GO:0006139,GO:0006725,GO:0006807,GO:0008150,GO:0008152,GO:0009987,GO:0016787,GO:0016788,GO:0034641,GO:0043170,GO:0043226,GO:0043227,GO:0043229,GO:0043231,GO:0044237,GO:0044238,GO:0044424,GO:0044464,GO:0046483,GO:0071704,GO:0090304,GO:0090305,GO:0097159,GO:1901360,GO:1901363	3.4.11.18	ko:K01265	-	-	-	-	ko00000,ko01000,ko01002	-	-	-	Peptidase_M24	IPR036005	Creatinase/aminopeptidase-like	1	2	1	1	1	1	2	1	1	1	2	1	2	1	1	1	2	1	1	1	1	1	1	1	1	1	1
OG0000727	84751.XP_007880322.1	4.87e-164	489	COG0024@1|root,KOG2776@2759|Eukaryota,38EEE@33154|Opisthokonta,3NXK3@4751|Fungi,3UXZP@5204|Basidiomycota,3MZK1@452284|Ustilaginomycotina	4751|Fungi	J	Metallopeptidase family M24	-	GO:0003674,GO:0003676,GO:0003677,GO:0003824,GO:0004518,GO:0005488,GO:0005575,GO:0005622,GO:0005623,GO:0005634,GO:0006139,GO:0006725,GO:0006807,GO:0008150,GO:0008152,GO:0009987,GO:0016787,GO:0016788,GO:0034641,GO:0043170,GO:0043226,GO:0043227,GO:0043229,GO:0043231,GO:0044237,GO:0044238,GO:0044424,GO:0044464,GO:0046483,GO:0071704,GO:0090304,GO:0090305,GO:0097159,GO:1901360,GO:1901363	3.4.11.18	ko:K01265	-	-	-	-	ko00000,ko01000,ko01002	-	-	-	Peptidase_M24	IPR047113	Proliferation-associated protein 2G4/ARX1	1	2	1	1	1	1	2	1	1	1	2	1	2	1	1	1	2	1	1	1	1	1	1	1	1	1	1
OG0000744	84751.XP_007879267.1	1.18e-136	441	COG0624@1|root,KOG2275@2759|Eukaryota,39RWD@33154|Opisthokonta,3NU4A@4751|Fungi,3V4FT@5204|Basidiomycota,3N1QD@452284|Ustilaginomycotina	4751|Fungi	E	Peptidase dimerisation domain	-	GO:0000322,GO:0000323,GO:0000324,GO:0000328,GO:0003674,GO:0003824,GO:0004180,GO:0005575,GO:0005622,GO:0005623,GO:0005737,GO:0005773,GO:0005775,GO:0006508,GO:0006807,GO:0008150,GO:0008152,GO:0008233,GO:0008238,GO:0009056,GO:0009057,GO:0009987,GO:0016787,GO:0019538,GO:0030163,GO:0031974,GO:0043170,GO:0043226,GO:0043227,GO:0043229,GO:0043231,GO:0043233,GO:0044237,GO:0044238,GO:0044248,GO:0044257,GO:…	3.4.17.4	ko:K01293	-	-	-	-	ko00000,ko01000,ko01002	-	-	-	M20_dimer,Peptidase_M20,Peptidase_M28	IPR036264	Bacterial exopeptidase dimerisation domain	1	2	2	2	4	5	4	0	0	0	4	1	2	2	3	5	5	1	1	1	1	1	0	0	0	0	0
OG0000744	84751.XP_007879267.1	1.18e-136	441	COG0624@1|root,KOG2275@2759|Eukaryota,39RWD@33154|Opisthokonta,3NU4A@4751|Fungi,3V4FT@5204|Basidiomycota,3N1QD@452284|Ustilaginomycotina	4751|Fungi	E	Peptidase dimerisation domain	-	GO:0000322,GO:0000323,GO:0000324,GO:0000328,GO:0003674,GO:0003824,GO:0004180,GO:0005575,GO:0005622,GO:0005623,GO:0005737,GO:0005773,GO:0005775,GO:0006508,GO:0006807,GO:0008150,GO:0008152,GO:0008233,GO:0008238,GO:0009056,GO:0009057,GO:0009987,GO:0016787,GO:0019538,GO:0030163,GO:0031974,GO:0043170,GO:0043226,GO:0043227,GO:0043229,GO:0043231,GO:0043233,GO:0044237,GO:0044238,GO:0044248,GO:0044257,GO:…	3.4.17.4	ko:K01293	-	-	-	-	ko00000,ko01000,ko01002	-	-	-	M20_dimer,Peptidase_M20,Peptidase_M28	IPR036264	Bacterial exopeptidase dimerisation domain	1	2	2	2	4	5	4	0	0	0	4	1	2	2	3	5	5	1	1	1	1	1	0	0	0	0	0
OG0000744	84751.XP_007879267.1	1.18e-136	441	COG0624@1|root,KOG2275@2759|Eukaryota,39RWD@33154|Opisthokonta,3NU4A@4751|Fungi,3V4FT@5204|Basidiomycota,3N1QD@452284|Ustilaginomycotina	4751|Fungi	E	Peptidase dimerisation domain	-	GO:0000322,GO:0000323,GO:0000324,GO:0000328,GO:0003674,GO:0003824,GO:0004180,GO:0005575,GO:0005622,GO:0005623,GO:0005737,GO:0005773,GO:0005775,GO:0006508,GO:0006807,GO:0008150,GO:0008152,GO:0008233,GO:0008238,GO:0009056,GO:0009057,GO:0009987,GO:0016787,GO:0019538,GO:0030163,GO:0031974,GO:0043170,GO:0043226,GO:0043227,GO:0043229,GO:0043231,GO:0043233,GO:0044237,GO:0044238,GO:0044248,GO:0044257,GO:…	3.4.17.4	ko:K01293	-	-	-	-	ko00000,ko01000,ko01002	-	-	-	M20_dimer,Peptidase_M20,Peptidase_M28	IPR047177	Peptidase M20A	1	2	2	2	4	5	4	0	0	0	4	1	2	2	3	5	5	1	1	1	1	1	0	0	0	0	0
OG0000770	430998.XP_007681750.1	1.56e-223	629	COG2355@1|root,KOG4127@2759|Eukaryota,38D9H@33154|Opisthokonta,3NUTJ@4751|Fungi,3QKPA@4890|Ascomycota,1ZXX8@147541|Dothideomycetes,3MHDI@451867|Dothideomycetidae	4751|Fungi	O	Belongs to the metallo-dependent hydrolases superfamily. Peptidase M19 family	-	-	3.4.13.19	ko:K01273	-	-	-	-	ko00000,ko00537,ko01000,ko01002,ko04147	-	-	-	Peptidase_M19	IPR008257	Peptidase M19	0	0	0	0	0	0	0	1	1	1	2	2	3	0	0	0	0	0	0	0	0	0	2	2	2	2	2
OG0000770	430998.XP_007681750.1	1.56e-223	629	COG2355@1|root,KOG4127@2759|Eukaryota,38D9H@33154|Opisthokonta,3NUTJ@4751|Fungi,3QKPA@4890|Ascomycota,1ZXX8@147541|Dothideomycetes,3MHDI@451867|Dothideomycetidae	4751|Fungi	O	Belongs to the metallo-dependent hydrolases superfamily. Peptidase M19 family	-	-	3.4.13.19	ko:K01273	-	-	-	-	ko00000,ko00537,ko01000,ko01002,ko04147	-	-	-	Peptidase_M19	IPR032466	Metal-dependent hydrolase	0	0	0	0	0	0	0	1	1	1	2	2	3	0	0	0	0	0	0	0	0	0	2	2	2	2	2
OG0000875	208960.XP_007271200.1	3.62e-97	333	KOG1864@1|root,KOG1864@2759|Eukaryota,38BB6@33154|Opisthokonta,3NXMR@4751|Fungi,3UYF0@5204|Basidiomycota,225Y3@155619|Agaricomycetes,3H0UK@355688|Agaricomycetes incertae sedis	4751|Fungi	O	Cysteine proteinase	creB	GO:0003674,GO:0003824,GO:0004843,GO:0005575,GO:0005622,GO:0005623,GO:0005737,GO:0006355,GO:0006464,GO:0006508,GO:0006511,GO:0006807,GO:0006810,GO:0006897,GO:0007154,GO:0007584,GO:0008150,GO:0008152,GO:0008233,GO:0008234,GO:0009056,GO:0009057,GO:0009605,GO:0009889,GO:0009890,GO:0009892,GO:0009987,GO:0009991,GO:0010468,GO:0010556,GO:0010558,GO:0010605,GO:0010629,GO:0010992,GO:0010995,GO:0016043,GO:…	3.4.19.12	ko:K11842,ko:K11872	-	-	-	-	ko00000,ko01000,ko01002,ko04121	-	-	-	UCH	IPR038765	Papain-like cysteine peptidase superfamily	1	1	1	1	1	1	2	1	1	1	2	1	2	1	1	1	2	1	1	1	1	1	1	1	1	1	1
OG0000875	208960.XP_007271200.1	3.62e-97	333	KOG1864@1|root,KOG1864@2759|Eukaryota,38BB6@33154|Opisthokonta,3NXMR@4751|Fungi,3UYF0@5204|Basidiomycota,225Y3@155619|Agaricomycetes,3H0UK@355688|Agaricomycetes incertae sedis	4751|Fungi	O	Cysteine proteinase	creB	GO:0003674,GO:0003824,GO:0004843,GO:0005575,GO:0005622,GO:0005623,GO:0005737,GO:0006355,GO:0006464,GO:0006508,GO:0006511,GO:0006807,GO:0006810,GO:0006897,GO:0007154,GO:0007584,GO:0008150,GO:0008152,GO:0008233,GO:0008234,GO:0009056,GO:0009057,GO:0009605,GO:0009889,GO:0009890,GO:0009892,GO:0009987,GO:0009991,GO:0010468,GO:0010556,GO:0010558,GO:0010605,GO:0010629,GO:0010992,GO:0010995,GO:0016043,GO:…	3.4.19.12	ko:K11842,ko:K11872	-	-	-	-	ko00000,ko01000,ko01002,ko04121	-	-	-	UCH	IPR050164	Ubiquitin carboxyl-terminal hydrolases	1	1	1	1	1	1	2	1	1	1	2	1	2	1	1	1	2	1	1	1	1	1	1	1	1	1	1
OG0000952	82508.K1VPD7	0	1617	KOG1868@1|root,KOG1868@2759|Eukaryota,38DC9@33154|Opisthokonta,3NX9E@4751|Fungi,3UYP9@5204|Basidiomycota,3VEDQ@5234|Tremellales	4751|Fungi	O	Ubiquitin carboxyl-terminal hydrolase	DOA4	GO:0000131,GO:0000502,GO:0002039,GO:0003674,GO:0003824,GO:0004175,GO:0004197,GO:0004843,GO:0005488,GO:0005515,GO:0005575,GO:0005622,GO:0005623,GO:0005634,GO:0005654,GO:0005737,GO:0005739,GO:0005768,GO:0005829,GO:0005933,GO:0005935,GO:0006139,GO:0006259,GO:0006275,GO:0006281,GO:0006283,GO:0006289,GO:0006325,GO:0006355,GO:0006464,GO:0006508,GO:0006511,GO:0006725,GO:0006807,GO:0006810,GO:0006811,GO:…	3.4.19.12	ko:K11839	ko04137,ko04144,ko04934,map04137,map04144,map04934	-	-	-	ko00000,ko00001,ko01000,ko01002,ko04121,ko04131	-	-	-	Rhodanese,UCH,USP8_dimer	IPR050185	Ubiquitin carboxyl-terminal hydrolase	2	1	1	1	1	1	1	1	1	1	2	1	2	0	1	1	1	1	1	1	1	1	1	1	1	1	1
OG0000952	82508.K1VPD7	0	1617	KOG1868@1|root,KOG1868@2759|Eukaryota,38DC9@33154|Opisthokonta,3NX9E@4751|Fungi,3UYP9@5204|Basidiomycota,3VEDQ@5234|Tremellales	4751|Fungi	O	Ubiquitin carboxyl-terminal hydrolase	DOA4	GO:0000131,GO:0000502,GO:0002039,GO:0003674,GO:0003824,GO:0004175,GO:0004197,GO:0004843,GO:0005488,GO:0005515,GO:0005575,GO:0005622,GO:0005623,GO:0005634,GO:0005654,GO:0005737,GO:0005739,GO:0005768,GO:0005829,GO:0005933,GO:0005935,GO:0006139,GO:0006259,GO:0006275,GO:0006281,GO:0006283,GO:0006289,GO:0006325,GO:0006355,GO:0006464,GO:0006508,GO:0006511,GO:0006725,GO:0006807,GO:0006810,GO:0006811,GO:…	3.4.19.12	ko:K11839	ko04137,ko04144,ko04934,map04137,map04144,map04934	-	-	-	ko00000,ko00001,ko01000,ko01002,ko04121,ko04131	-	-	-	Rhodanese,UCH,USP8_dimer	IPR038765	Papain-like cysteine peptidase superfamily	2	1	1	1	1	1	1	1	1	1	2	1	2	0	1	1	1	1	1	1	1	1	1	1	1	1	1
OG0000952	82508.K1VPD7	0	1617	KOG1868@1|root,KOG1868@2759|Eukaryota,38DC9@33154|Opisthokonta,3NX9E@4751|Fungi,3UYP9@5204|Basidiomycota,3VEDQ@5234|Tremellales	4751|Fungi	O	Ubiquitin carboxyl-terminal hydrolase	DOA4	GO:0000131,GO:0000502,GO:0002039,GO:0003674,GO:0003824,GO:0004175,GO:0004197,GO:0004843,GO:0005488,GO:0005515,GO:0005575,GO:0005622,GO:0005623,GO:0005634,GO:0005654,GO:0005737,GO:0005739,GO:0005768,GO:0005829,GO:0005933,GO:0005935,GO:0006139,GO:0006259,GO:0006275,GO:0006281,GO:0006283,GO:0006289,GO:0006325,GO:0006355,GO:0006464,GO:0006508,GO:0006511,GO:0006725,GO:0006807,GO:0006810,GO:0006811,GO:…	3.4.19.12	ko:K11839	ko04137,ko04144,ko04934,map04137,map04144,map04934	-	-	-	ko00000,ko00001,ko01000,ko01002,ko04121,ko04131	-	-	-	Rhodanese,UCH,USP8_dimer	IPR036873	Rhodanese-like domain superfamily	2	1	1	1	1	1	1	1	1	1	2	1	2	0	1	1	1	1	1	1	1	1	1	1	1	1	1
OG0000981	63402.XP_003177316.1	0	1024	KOG1872@1|root,KOG1872@2759|Eukaryota,38F2F@33154|Opisthokonta,3NUIQ@4751|Fungi,3QMX4@4890|Ascomycota,20CN6@147545|Eurotiomycetes,3B0ZU@33183|Onygenales,3FXTB@34384|Arthrodermataceae	4751|Fungi	O	Belongs to the peptidase C19 family	UBP6	GO:0000502,GO:0003674,GO:0003824,GO:0004843,GO:0005575,GO:0005622,GO:0005623,GO:0005838,GO:0006464,GO:0006508,GO:0006511,GO:0006807,GO:0008150,GO:0008152,GO:0008233,GO:0008234,GO:0009056,GO:0009057,GO:0009892,GO:0009894,GO:0009895,GO:0009987,GO:0010498,GO:0010605,GO:0016579,GO:0016787,GO:0019222,GO:0019538,GO:0019783,GO:0019941,GO:0022624,GO:0030162,GO:0030163,GO:0031323,GO:0031324,GO:0031329,GO:…	3.4.19.12	ko:K11843	-	-	-	-	ko00000,ko01000,ko01002,ko04121	-	-	-	UCH,ubiquitin	IPR038765	Papain-like cysteine peptidase superfamily	1	1	1	1	1	1	1	1	1	1	2	1	2	1	1	2	2	1	1	1	1	1	1	1	1	1	1
OG0000981	63402.XP_003177316.1	0	1024	KOG1872@1|root,KOG1872@2759|Eukaryota,38F2F@33154|Opisthokonta,3NUIQ@4751|Fungi,3QMX4@4890|Ascomycota,20CN6@147545|Eurotiomycetes,3B0ZU@33183|Onygenales,3FXTB@34384|Arthrodermataceae	4751|Fungi	O	Belongs to the peptidase C19 family	UBP6	GO:0000502,GO:0003674,GO:0003824,GO:0004843,GO:0005575,GO:0005622,GO:0005623,GO:0005838,GO:0006464,GO:0006508,GO:0006511,GO:0006807,GO:0008150,GO:0008152,GO:0008233,GO:0008234,GO:0009056,GO:0009057,GO:0009892,GO:0009894,GO:0009895,GO:0009987,GO:0010498,GO:0010605,GO:0016579,GO:0016787,GO:0019222,GO:0019538,GO:0019783,GO:0019941,GO:0022624,GO:0030162,GO:0030163,GO:0031323,GO:0031324,GO:0031329,GO:…	3.4.19.12	ko:K11843	-	-	-	-	ko00000,ko01000,ko01002,ko04121	-	-	-	UCH,ubiquitin	IPR044635	Ubiquitin carboxyl-terminal hydrolase 14-like	1	1	1	1	1	1	1	1	1	1	2	1	2	1	1	2	2	1	1	1	1	1	1	1	1	1	1
OG0000981	63402.XP_003177316.1	0	1024	KOG1872@1|root,KOG1872@2759|Eukaryota,38F2F@33154|Opisthokonta,3NUIQ@4751|Fungi,3QMX4@4890|Ascomycota,20CN6@147545|Eurotiomycetes,3B0ZU@33183|Onygenales,3FXTB@34384|Arthrodermataceae	4751|Fungi	O	Belongs to the peptidase C19 family	UBP6	GO:0000502,GO:0003674,GO:0003824,GO:0004843,GO:0005575,GO:0005622,GO:0005623,GO:0005838,GO:0006464,GO:0006508,GO:0006511,GO:0006807,GO:0008150,GO:0008152,GO:0008233,GO:0008234,GO:0009056,GO:0009057,GO:0009892,GO:0009894,GO:0009895,GO:0009987,GO:0010498,GO:0010605,GO:0016579,GO:0016787,GO:0019222,GO:0019538,GO:0019783,GO:0019941,GO:0022624,GO:0030162,GO:0030163,GO:0031323,GO:0031324,GO:0031329,GO:…	3.4.19.12	ko:K11843	-	-	-	-	ko00000,ko01000,ko01002,ko04121	-	-	-	UCH,ubiquitin	IPR029071	Ubiquitin-like domain superfamily	1	1	1	1	1	1	1	1	1	1	2	1	2	1	1	2	2	1	1	1	1	1	1	1	1	1	1
OG0000981	63402.XP_003177316.1	0	1024	KOG1872@1|root,KOG1872@2759|Eukaryota,38F2F@33154|Opisthokonta,3NUIQ@4751|Fungi,3QMX4@4890|Ascomycota,20CN6@147545|Eurotiomycetes,3B0ZU@33183|Onygenales,3FXTB@34384|Arthrodermataceae	4751|Fungi	O	Belongs to the peptidase C19 family	UBP6	GO:0000502,GO:0003674,GO:0003824,GO:0004843,GO:0005575,GO:0005622,GO:0005623,GO:0005838,GO:0006464,GO:0006508,GO:0006511,GO:0006807,GO:0008150,GO:0008152,GO:0008233,GO:0008234,GO:0009056,GO:0009057,GO:0009892,GO:0009894,GO:0009895,GO:0009987,GO:0010498,GO:0010605,GO:0016579,GO:0016787,GO:0019222,GO:0019538,GO:0019783,GO:0019941,GO:0022624,GO:0030162,GO:0030163,GO:0031323,GO:0031324,GO:0031329,GO:…	3.4.19.12	ko:K11843	-	-	-	-	ko00000,ko01000,ko01002,ko04121	-	-	-	UCH,ubiquitin	IPR029069	HotDog domain superfamily	1	1	1	1	1	1	1	1	1	1	2	1	2	1	1	2	2	1	1	1	1	1	1	1	1	1	1
OG0000982	120017.I2FZJ5	1.7e-88	300	KOG1339@1|root,KOG1339@2759|Eukaryota,3A19X@33154|Opisthokonta,3NX73@4751|Fungi,3UZ6D@5204|Basidiomycota,3N1Q5@452284|Ustilaginomycotina	4751|Fungi	O	Xylanase inhibitor N-terminal	-	-	3.4.23.5	ko:K01379	ko04071,ko04140,ko04142,ko04210,ko04915,ko05152,map04071,map04140,map04142,map04210,map04915,map05152	-	-	-	ko00000,ko00001,ko01000,ko01002,ko04147	-	-	-	Asp	IPR021109	Aspartic peptidase domain superfamily	1	2	2	2	1	2	2	1	1	1	2	1	2	1	1	0	0	0	0	1	0	0	1	1	1	1	1
OG0000982	120017.I2FZJ5	1.7e-88	300	KOG1339@1|root,KOG1339@2759|Eukaryota,3A19X@33154|Opisthokonta,3NX73@4751|Fungi,3UZ6D@5204|Basidiomycota,3N1Q5@452284|Ustilaginomycotina	4751|Fungi	O	Xylanase inhibitor N-terminal	-	-	3.4.23.5	ko:K01379	ko04071,ko04140,ko04142,ko04210,ko04915,ko05152,map04071,map04140,map04142,map04210,map04915,map05152	-	-	-	ko00000,ko00001,ko01000,ko01002,ko04147	-	-	-	Asp	IPR021109	Aspartic peptidase domain superfamily	1	2	2	2	1	2	2	1	1	1	2	1	2	1	1	0	0	0	0	1	0	0	1	1	1	1	1
OG0000982	120017.I2FZJ5	1.7e-88	300	KOG1339@1|root,KOG1339@2759|Eukaryota,3A19X@33154|Opisthokonta,3NX73@4751|Fungi,3UZ6D@5204|Basidiomycota,3N1Q5@452284|Ustilaginomycotina	4751|Fungi	O	Xylanase inhibitor N-terminal	-	-	3.4.23.5	ko:K01379	ko04071,ko04140,ko04142,ko04210,ko04915,ko05152,map04071,map04140,map04142,map04210,map04915,map05152	-	-	-	ko00000,ko00001,ko01000,ko01002,ko04147	-	-	-	Asp	IPR035427	Tim10-like domain superfamily	1	2	2	2	1	2	2	1	1	1	2	1	2	1	1	0	0	0	0	1	0	0	1	1	1	1	1
OG0000982	120017.I2FZJ5	1.7e-88	300	KOG1339@1|root,KOG1339@2759|Eukaryota,3A19X@33154|Opisthokonta,3NX73@4751|Fungi,3UZ6D@5204|Basidiomycota,3N1Q5@452284|Ustilaginomycotina	4751|Fungi	O	Xylanase inhibitor N-terminal	-	-	3.4.23.5	ko:K01379	ko04071,ko04140,ko04142,ko04210,ko04915,ko05152,map04071,map04140,map04142,map04210,map04915,map05152	-	-	-	ko00000,ko00001,ko01000,ko01002,ko04147	-	-	-	Asp	IPR001461	Aspartic peptidase A1	1	2	2	2	1	2	2	1	1	1	2	1	2	1	1	0	0	0	0	1	0	0	1	1	1	1	1
OG0001140	5270.UM00354P0	5.88e-89	312	COG5160@1|root,KOG0778@2759|Eukaryota,38HPZ@33154|Opisthokonta,3P3UZ@4751|Fungi,3V0CX@5204|Basidiomycota,3N16Q@452284|Ustilaginomycotina	4751|Fungi	O	Ulp1 protease family, C-terminal catalytic domain	-	GO:0000086,GO:0000278,GO:0003674,GO:0003824,GO:0004175,GO:0004197,GO:0005575,GO:0005622,GO:0005623,GO:0005634,GO:0005635,GO:0005730,GO:0005737,GO:0006325,GO:0006342,GO:0006355,GO:0006464,GO:0006508,GO:0006807,GO:0006996,GO:0007049,GO:0008150,GO:0008152,GO:0008233,GO:0008234,GO:0009889,GO:0009890,GO:0009892,GO:0009987,GO:0010467,GO:0010468,GO:0010556,GO:0010558,GO:0010605,GO:0010629,GO:0012505,GO:…	3.4.22.68	ko:K08592	-	-	-	-	ko00000,ko01000,ko01002,ko04121	-	-	-	Peptidase_C48	IPR038765	Papain-like cysteine peptidase superfamily	2	1	0	1	1	1	0	1	1	1	2	2	2	1	1	1	2	1	1	1	1	1	1	1	1	1	1
OG0001222	82508.K1VQG6	5.08e-168	471	COG0638@1|root,KOG0179@2759|Eukaryota,38EK6@33154|Opisthokonta,3NZ3T@4751|Fungi,3UZSZ@5204|Basidiomycota,3VCRA@5234|Tremellales	4751|Fungi	O	Proteasome subunit beta type	PRE7	GO:0000502,GO:0005575,GO:0005622,GO:0005623,GO:0005634,GO:0005737,GO:0005783,GO:0005789,GO:0005829,GO:0005839,GO:0006508,GO:0006511,GO:0006807,GO:0007088,GO:0007346,GO:0008150,GO:0008152,GO:0009056,GO:0009057,GO:0009896,GO:0009987,GO:0010498,GO:0010499,GO:0010564,GO:0010638,GO:0010965,GO:0012505,GO:0016020,GO:0019538,GO:0019748,GO:0019774,GO:0019941,GO:0030071,GO:0030163,GO:0031331,GO:0031597,GO:…	3.4.25.1	ko:K02732	ko03050,map03050	M00337,M00340	-	-	ko00000,ko00001,ko00002,ko01000,ko01002,ko03051	-	-	-	Proteasome	IPR023333	Proteasome B-type subunit	1	1	1	1	1	1	1	1	1	1	2	1	2	1	1	1	2	1	1	1	1	1	1	1	1	1	1
OG0001222	82508.K1VQG6	5.08e-168	471	COG0638@1|root,KOG0179@2759|Eukaryota,38EK6@33154|Opisthokonta,3NZ3T@4751|Fungi,3UZSZ@5204|Basidiomycota,3VCRA@5234|Tremellales	4751|Fungi	O	Proteasome subunit beta type	PRE7	GO:0000502,GO:0005575,GO:0005622,GO:0005623,GO:0005634,GO:0005737,GO:0005783,GO:0005789,GO:0005829,GO:0005839,GO:0006508,GO:0006511,GO:0006807,GO:0007088,GO:0007346,GO:0008150,GO:0008152,GO:0009056,GO:0009057,GO:0009896,GO:0009987,GO:0010498,GO:0010499,GO:0010564,GO:0010638,GO:0010965,GO:0012505,GO:0016020,GO:0019538,GO:0019748,GO:0019774,GO:0019941,GO:0030071,GO:0030163,GO:0031331,GO:0031597,GO:…	3.4.25.1	ko:K02732	ko03050,map03050	M00337,M00340	-	-	ko00000,ko00001,ko00002,ko01000,ko01002,ko03051	-	-	-	Proteasome	IPR029055	Nucleophile aminohydrolases, N-terminal	1	1	1	1	1	1	1	1	1	1	2	1	2	1	1	1	2	1	1	1	1	1	1	1	1	1	1
OG0001233	63405.XP_002843416.1	1.57e-140	402	COG0638@1|root,KOG0180@2759|Eukaryota,38GZR@33154|Opisthokonta,3NWF8@4751|Fungi,3QKBY@4890|Ascomycota,20BB2@147545|Eurotiomycetes,3B1IJ@33183|Onygenales,3FXWU@34384|Arthrodermataceae	4751|Fungi	O	Proteasome subunit beta	PUP3	GO:0000502,GO:0003674,GO:0005575,GO:0005622,GO:0005623,GO:0005634,GO:0005737,GO:0005783,GO:0005789,GO:0005829,GO:0005839,GO:0006508,GO:0006511,GO:0006807,GO:0007088,GO:0007346,GO:0008047,GO:0008150,GO:0008152,GO:0009056,GO:0009057,GO:0009893,GO:0009896,GO:0009987,GO:0010498,GO:0010499,GO:0010564,GO:0010604,GO:0010638,GO:0010950,GO:0010952,GO:0010965,GO:0012505,GO:0016020,GO:0016504,GO:0019222,GO:…	3.4.25.1	ko:K02735	ko03050,map03050	M00337,M00340	-	-	ko00000,ko00001,ko00002,ko01000,ko01002,ko03051	-	-	-	Proteasome	IPR023333	Proteasome B-type subunit	1	1	1	1	1	1	1	1	1	1	2	1	2	1	1	2	2	1	1	1	1	1	1	1	1	1	1
OG0001233	63405.XP_002843416.1	1.57e-140	402	COG0638@1|root,KOG0180@2759|Eukaryota,38GZR@33154|Opisthokonta,3NWF8@4751|Fungi,3QKBY@4890|Ascomycota,20BB2@147545|Eurotiomycetes,3B1IJ@33183|Onygenales,3FXWU@34384|Arthrodermataceae	4751|Fungi	O	Proteasome subunit beta	PUP3	GO:0000502,GO:0003674,GO:0005575,GO:0005622,GO:0005623,GO:0005634,GO:0005737,GO:0005783,GO:0005789,GO:0005829,GO:0005839,GO:0006508,GO:0006511,GO:0006807,GO:0007088,GO:0007346,GO:0008047,GO:0008150,GO:0008152,GO:0009056,GO:0009057,GO:0009893,GO:0009896,GO:0009987,GO:0010498,GO:0010499,GO:0010564,GO:0010604,GO:0010638,GO:0010950,GO:0010952,GO:0010965,GO:0012505,GO:0016020,GO:0016504,GO:0019222,GO:…	3.4.25.1	ko:K02735	ko03050,map03050	M00337,M00340	-	-	ko00000,ko00001,ko00002,ko01000,ko01002,ko03051	-	-	-	Proteasome	IPR029055	Nucleophile aminohydrolases, N-terminal	1	1	1	1	1	1	1	1	1	1	2	1	2	1	1	2	2	1	1	1	1	1	1	1	1	1	1
OG0001237	264951.V5G3Q3	0	1234	KOG1649@1|root,KOG2137@1|root,KOG3675@1|root,KOG1649@2759|Eukaryota,KOG2137@2759|Eukaryota,KOG3675@2759|Eukaryota,38E6G@33154|Opisthokonta,3NWHP@4751|Fungi,3QMR7@4890|Ascomycota,20E8C@147545|Eurotiomycetes,3S7YE@5042|Eurotiales	4751|Fungi	O	Belongs to the peptidase M49 family	YOL057W	GO:0003674,GO:0003824,GO:0004177,GO:0005575,GO:0005622,GO:0005623,GO:0005634,GO:0005737,GO:0006508,GO:0006807,GO:0008150,GO:0008152,GO:0008233,GO:0008238,GO:0008239,GO:0016787,GO:0019538,GO:0043170,GO:0043226,GO:0043227,GO:0043229,GO:0043231,GO:0044238,GO:0044424,GO:0044464,GO:0070011,GO:0071704,GO:0140096,GO:1901564	3.4.14.4	ko:K01277	-	-	-	-	ko00000,ko01000,ko01002	-	-	-	Peptidase_M49	IPR011333	SKP1/BTB/POZ domain superfamily	1	1	1	1	1	1	1	1	1	1	2	1	2	3	2	0	1	1	1	0	1	1	1	1	1	1	1
OG0001260	327079.R9P279	6.7e-133	404	COG0638@1|root,KOG0173@2759|Eukaryota,38CTY@33154|Opisthokonta,3NWM3@4751|Fungi,3V02T@5204|Basidiomycota,3N3CR@452284|Ustilaginomycotina	4751|Fungi	O	Proteasome beta subunits C terminal	PUP1	GO:0000502,GO:0003674,GO:0003824,GO:0004175,GO:0005575,GO:0005622,GO:0005623,GO:0005634,GO:0005737,GO:0005783,GO:0005789,GO:0005829,GO:0005839,GO:0006508,GO:0006511,GO:0006807,GO:0007088,GO:0007346,GO:0008150,GO:0008152,GO:0008233,GO:0009056,GO:0009057,GO:0009896,GO:0009987,GO:0010498,GO:0010499,GO:0010564,GO:0010638,GO:0010965,GO:0012505,GO:0016020,GO:0016787,GO:0019538,GO:0019774,GO:0019941,GO:…	3.4.25.1	ko:K02739	ko03050,map03050	M00340	-	-	ko00000,ko00001,ko00002,ko01000,ko01002,ko03051	-	-	-	Pr_beta_C,Proteasome	IPR050446	FAD-dependent Oxidoreductases and Apoptosis Regulators	1	1	1	1	1	1	1	1	1	1	2	1	2	1	1	2	2	1	1	1	1	1	1	1	1	1	1
OG0001260	327079.R9P279	6.7e-133	404	COG0638@1|root,KOG0173@2759|Eukaryota,38CTY@33154|Opisthokonta,3NWM3@4751|Fungi,3V02T@5204|Basidiomycota,3N3CR@452284|Ustilaginomycotina	4751|Fungi	O	Proteasome beta subunits C terminal	PUP1	GO:0000502,GO:0003674,GO:0003824,GO:0004175,GO:0005575,GO:0005622,GO:0005623,GO:0005634,GO:0005737,GO:0005783,GO:0005789,GO:0005829,GO:0005839,GO:0006508,GO:0006511,GO:0006807,GO:0007088,GO:0007346,GO:0008150,GO:0008152,GO:0008233,GO:0009056,GO:0009057,GO:0009896,GO:0009987,GO:0010498,GO:0010499,GO:0010564,GO:0010638,GO:0010965,GO:0012505,GO:0016020,GO:0016787,GO:0019538,GO:0019774,GO:0019941,GO:…	3.4.25.1	ko:K02739	ko03050,map03050	M00340	-	-	ko00000,ko00001,ko00002,ko01000,ko01002,ko03051	-	-	-	Pr_beta_C,Proteasome	IPR036188	FAD/NAD(P)-binding domain superfamily	1	1	1	1	1	1	1	1	1	1	2	1	2	1	1	2	2	1	1	1	1	1	1	1	1	1	1
OG0001260	327079.R9P279	6.7e-133	404	COG0638@1|root,KOG0173@2759|Eukaryota,38CTY@33154|Opisthokonta,3NWM3@4751|Fungi,3V02T@5204|Basidiomycota,3N3CR@452284|Ustilaginomycotina	4751|Fungi	O	Proteasome beta subunits C terminal	PUP1	GO:0000502,GO:0003674,GO:0003824,GO:0004175,GO:0005575,GO:0005622,GO:0005623,GO:0005634,GO:0005737,GO:0005783,GO:0005789,GO:0005829,GO:0005839,GO:0006508,GO:0006511,GO:0006807,GO:0007088,GO:0007346,GO:0008150,GO:0008152,GO:0008233,GO:0009056,GO:0009057,GO:0009896,GO:0009987,GO:0010498,GO:0010499,GO:0010564,GO:0010638,GO:0010965,GO:0012505,GO:0016020,GO:0016787,GO:0019538,GO:0019774,GO:0019941,GO:…	3.4.25.1	ko:K02739	ko03050,map03050	M00340	-	-	ko00000,ko00001,ko00002,ko01000,ko01002,ko03051	-	-	-	Pr_beta_C,Proteasome	IPR036922	Rieske [2Fe-2S] iron-sulphur domain superfamily	1	1	1	1	1	1	1	1	1	1	2	1	2	1	1	2	2	1	1	1	1	1	1	1	1	1	1
OG0001260	327079.R9P279	6.7e-133	404	COG0638@1|root,KOG0173@2759|Eukaryota,38CTY@33154|Opisthokonta,3NWM3@4751|Fungi,3V02T@5204|Basidiomycota,3N3CR@452284|Ustilaginomycotina	4751|Fungi	O	Proteasome beta subunits C terminal	PUP1	GO:0000502,GO:0003674,GO:0003824,GO:0004175,GO:0005575,GO:0005622,GO:0005623,GO:0005634,GO:0005737,GO:0005783,GO:0005789,GO:0005829,GO:0005839,GO:0006508,GO:0006511,GO:0006807,GO:0007088,GO:0007346,GO:0008150,GO:0008152,GO:0008233,GO:0009056,GO:0009057,GO:0009896,GO:0009987,GO:0010498,GO:0010499,GO:0010564,GO:0010638,GO:0010965,GO:0012505,GO:0016020,GO:0016787,GO:0019538,GO:0019774,GO:0019941,GO:…	3.4.25.1	ko:K02739	ko03050,map03050	M00340	-	-	ko00000,ko00001,ko00002,ko01000,ko01002,ko03051	-	-	-	Pr_beta_C,Proteasome	IPR029055	Nucleophile aminohydrolases, N-terminal	1	1	1	1	1	1	1	1	1	1	2	1	2	1	1	2	2	1	1	1	1	1	1	1	1	1	1
OG0001260	327079.R9P279	6.7e-133	404	COG0638@1|root,KOG0173@2759|Eukaryota,38CTY@33154|Opisthokonta,3NWM3@4751|Fungi,3V02T@5204|Basidiomycota,3N3CR@452284|Ustilaginomycotina	4751|Fungi	O	Proteasome beta subunits C terminal	PUP1	GO:0000502,GO:0003674,GO:0003824,GO:0004175,GO:0005575,GO:0005622,GO:0005623,GO:0005634,GO:0005737,GO:0005783,GO:0005789,GO:0005829,GO:0005839,GO:0006508,GO:0006511,GO:0006807,GO:0007088,GO:0007346,GO:0008150,GO:0008152,GO:0008233,GO:0009056,GO:0009057,GO:0009896,GO:0009987,GO:0010498,GO:0010499,GO:0010564,GO:0010638,GO:0010965,GO:0012505,GO:0016020,GO:0016787,GO:0019538,GO:0019774,GO:0019941,GO:…	3.4.25.1	ko:K02739	ko03050,map03050	M00340	-	-	ko00000,ko00001,ko00002,ko01000,ko01002,ko03051	-	-	-	Pr_beta_C,Proteasome	IPR016156	FAD/NAD-linked reductase, dimerisation domain superfamily	1	1	1	1	1	1	1	1	1	1	2	1	2	1	1	2	2	1	1	1	1	1	1	1	1	1	1
OG0001260	327079.R9P279	6.7e-133	404	COG0638@1|root,KOG0173@2759|Eukaryota,38CTY@33154|Opisthokonta,3NWM3@4751|Fungi,3V02T@5204|Basidiomycota,3N3CR@452284|Ustilaginomycotina	4751|Fungi	O	Proteasome beta subunits C terminal	PUP1	GO:0000502,GO:0003674,GO:0003824,GO:0004175,GO:0005575,GO:0005622,GO:0005623,GO:0005634,GO:0005737,GO:0005783,GO:0005789,GO:0005829,GO:0005839,GO:0006508,GO:0006511,GO:0006807,GO:0007088,GO:0007346,GO:0008150,GO:0008152,GO:0008233,GO:0009056,GO:0009057,GO:0009896,GO:0009987,GO:0010498,GO:0010499,GO:0010564,GO:0010638,GO:0010965,GO:0012505,GO:0016020,GO:0016787,GO:0019538,GO:0019774,GO:0019941,GO:…	3.4.25.1	ko:K02739	ko03050,map03050	M00340	-	-	ko00000,ko00001,ko00002,ko01000,ko01002,ko03051	-	-	-	Pr_beta_C,Proteasome	IPR036188	FAD/NAD(P)-binding domain superfamily	1	1	1	1	1	1	1	1	1	1	2	1	2	1	1	2	2	1	1	1	1	1	1	1	1	1	1
OG0001272	5270.UM04116P0	6.51e-45	169	COG5539@1|root,KOG2606@2759|Eukaryota,38DFR@33154|Opisthokonta,3NZP9@4751|Fungi,3V1FN@5204|Basidiomycota,3N0UU@452284|Ustilaginomycotina	4751|Fungi	OT	OTU-like cysteine protease	OTU2	GO:0005575,GO:0005622,GO:0005623,GO:0005737,GO:0006464,GO:0006508,GO:0006511,GO:0006807,GO:0006950,GO:0008150,GO:0008152,GO:0009056,GO:0009057,GO:0009987,GO:0010033,GO:0010243,GO:0010498,GO:0019538,GO:0019941,GO:0030163,GO:0030433,GO:0033554,GO:0034976,GO:0036211,GO:0036503,GO:0042221,GO:0043161,GO:0043170,GO:0043412,GO:0043632,GO:0044237,GO:0044238,GO:0044248,GO:0044257,GO:0044260,GO:0044265,GO:…	3.4.19.12	ko:K18342	-	-	-	-	ko00000,ko01000,ko04121	-	-	-	OTU	IPR050704	Peptidase C85-like	2	1	1	1	1	1	1	1	1	1	2	1	2	1	1	1	2	1	1	1	1	1	1	1	1	1	1
OG0001272	5270.UM04116P0	6.51e-45	169	COG5539@1|root,KOG2606@2759|Eukaryota,38DFR@33154|Opisthokonta,3NZP9@4751|Fungi,3V1FN@5204|Basidiomycota,3N0UU@452284|Ustilaginomycotina	4751|Fungi	OT	OTU-like cysteine protease	OTU2	GO:0005575,GO:0005622,GO:0005623,GO:0005737,GO:0006464,GO:0006508,GO:0006511,GO:0006807,GO:0006950,GO:0008150,GO:0008152,GO:0009056,GO:0009057,GO:0009987,GO:0010033,GO:0010243,GO:0010498,GO:0019538,GO:0019941,GO:0030163,GO:0030433,GO:0033554,GO:0034976,GO:0036211,GO:0036503,GO:0042221,GO:0043161,GO:0043170,GO:0043412,GO:0043632,GO:0044237,GO:0044238,GO:0044248,GO:0044257,GO:0044260,GO:0044265,GO:…	3.4.19.12	ko:K18342	-	-	-	-	ko00000,ko01000,ko04121	-	-	-	OTU	IPR038765	Papain-like cysteine peptidase superfamily	2	1	1	1	1	1	1	1	1	1	2	1	2	1	1	1	2	1	1	1	1	1	1	1	1	1	1
OG0001273	42374.XP_002419484.1	0	1321	KOG1867@1|root,KOG1867@2759|Eukaryota,39R4A@33154|Opisthokonta,3NWVH@4751|Fungi,3QMCU@4890|Ascomycota,3RR3C@4891|Saccharomycetes,479GG@766764|Debaryomycetaceae	4751|Fungi	O	Belongs to the peptidase C19 family	UBP1	GO:0003674,GO:0003824,GO:0004843,GO:0005575,GO:0005622,GO:0005623,GO:0005737,GO:0005783,GO:0006464,GO:0006508,GO:0006807,GO:0008150,GO:0008152,GO:0008233,GO:0008234,GO:0009987,GO:0012505,GO:0016579,GO:0016787,GO:0019538,GO:0019783,GO:0036211,GO:0036459,GO:0043170,GO:0043226,GO:0043227,GO:0043229,GO:0043231,GO:0043412,GO:0044237,GO:0044238,GO:0044260,GO:0044267,GO:0044424,GO:0044444,GO:0044464,GO:…	3.4.19.12	ko:K11870	-	-	-	-	ko00000,ko01000,ko01002,ko04121	-	-	-	UCH	IPR038765	Papain-like cysteine peptidase superfamily	1	1	1	1	1	1	1	1	1	1	2	1	2	1	1	2	2	1	1	1	0	0	1	1	1	1	1
OG0001273	42374.XP_002419484.1	0	1321	KOG1867@1|root,KOG1867@2759|Eukaryota,39R4A@33154|Opisthokonta,3NWVH@4751|Fungi,3QMCU@4890|Ascomycota,3RR3C@4891|Saccharomycetes,479GG@766764|Debaryomycetaceae	4751|Fungi	O	Belongs to the peptidase C19 family	UBP1	GO:0003674,GO:0003824,GO:0004843,GO:0005575,GO:0005622,GO:0005623,GO:0005737,GO:0005783,GO:0006464,GO:0006508,GO:0006807,GO:0008150,GO:0008152,GO:0008233,GO:0008234,GO:0009987,GO:0012505,GO:0016579,GO:0016787,GO:0019538,GO:0019783,GO:0036211,GO:0036459,GO:0043170,GO:0043226,GO:0043227,GO:0043229,GO:0043231,GO:0043412,GO:0044237,GO:0044238,GO:0044260,GO:0044267,GO:0044424,GO:0044444,GO:0044464,GO:…	3.4.19.12	ko:K11870	-	-	-	-	ko00000,ko01000,ko01002,ko04121	-	-	-	UCH	IPR050164	Ubiquitin carboxyl-terminal hydrolases	1	1	1	1	1	1	1	1	1	1	2	1	2	1	1	2	2	1	1	1	0	0	1	1	1	1	1
OG0001379	82508.K1WLE3	0	987	COG2939@1|root,KOG1282@2759|Eukaryota,38CNI@33154|Opisthokonta,3NVHT@4751|Fungi,3UZZK@5204|Basidiomycota,3VE2W@5234|Tremellales	4751|Fungi	EO	Serine carboxypeptidase	KEX1	GO:0000322,GO:0000323,GO:0000324,GO:0001906,GO:0003674,GO:0003824,GO:0004180,GO:0004185,GO:0005575,GO:0005622,GO:0005623,GO:0005737,GO:0005773,GO:0005794,GO:0005802,GO:0006508,GO:0006807,GO:0006915,GO:0008150,GO:0008152,GO:0008219,GO:0008233,GO:0008236,GO:0008238,GO:0009056,GO:0009057,GO:0009405,GO:0009987,GO:0010467,GO:0010720,GO:0012501,GO:0012505,GO:0016485,GO:0016787,GO:0017171,GO:0019538,GO:…	3.4.16.6	ko:K01288	-	-	-	-	ko00000,ko01000,ko01002	-	-	-	Peptidase_S10	IPR029058	Alpha/Beta hydrolase fold	2	1	1	1	2	2	1	1	1	1	2	1	2	1	1	1	1	1	1	1	1	1	1	1	1	1	1
OG0001379	82508.K1WLE3	0	987	COG2939@1|root,KOG1282@2759|Eukaryota,38CNI@33154|Opisthokonta,3NVHT@4751|Fungi,3UZZK@5204|Basidiomycota,3VE2W@5234|Tremellales	4751|Fungi	EO	Serine carboxypeptidase	KEX1	GO:0000322,GO:0000323,GO:0000324,GO:0001906,GO:0003674,GO:0003824,GO:0004180,GO:0004185,GO:0005575,GO:0005622,GO:0005623,GO:0005737,GO:0005773,GO:0005794,GO:0005802,GO:0006508,GO:0006807,GO:0006915,GO:0008150,GO:0008152,GO:0008219,GO:0008233,GO:0008236,GO:0008238,GO:0009056,GO:0009057,GO:0009405,GO:0009987,GO:0010467,GO:0010720,GO:0012501,GO:0012505,GO:0016485,GO:0016787,GO:0017171,GO:0019538,GO:…	3.4.16.6	ko:K01288	-	-	-	-	ko00000,ko01000,ko01002	-	-	-	Peptidase_S10	IPR001563	Peptidase S10, serine carboxypeptidase	2	1	1	1	2	2	1	1	1	1	2	1	2	1	1	1	1	1	1	1	1	1	1	1	1	1	1
OG0001506	63418.F2PQ96	0	1954	COG5160@1|root,KOG0779@2759|Eukaryota,38FW9@33154|Opisthokonta,3P3Y4@4751|Fungi,3QS83@4890|Ascomycota,20CBH@147545|Eurotiomycetes,3AZF3@33183|Onygenales,3FYJN@34384|Arthrodermataceae	4751|Fungi	O	Ulp1 protease family, C-terminal catalytic domain	-	GO:0000075,GO:0000278,GO:0003674,GO:0003824,GO:0004175,GO:0005575,GO:0005622,GO:0005623,GO:0005634,GO:0005737,GO:0006276,GO:0006323,GO:0006417,GO:0006464,GO:0006508,GO:0006807,GO:0006996,GO:0007049,GO:0007088,GO:0007093,GO:0007094,GO:0007346,GO:0008150,GO:0008152,GO:0008233,GO:0008234,GO:0009889,GO:0009987,GO:0010468,GO:0010494,GO:0010556,GO:0010564,GO:0010608,GO:0010639,GO:0010948,GO:0010965,GO:…	3.4.22.68	ko:K08596	-	-	-	-	ko00000,ko01000,ko01002,ko04121	-	-	-	Peptidase_C48	IPR038765	Papain-like cysteine peptidase superfamily	1	1	1	1	1	1	1	1	2	1	2	1	2	1	1	2	2	1	1	1	0	1	1	1	1	1	1
OG0001506	63418.F2PQ96	0	1954	COG5160@1|root,KOG0779@2759|Eukaryota,38FW9@33154|Opisthokonta,3P3Y4@4751|Fungi,3QS83@4890|Ascomycota,20CBH@147545|Eurotiomycetes,3AZF3@33183|Onygenales,3FYJN@34384|Arthrodermataceae	4751|Fungi	O	Ulp1 protease family, C-terminal catalytic domain	-	GO:0000075,GO:0000278,GO:0003674,GO:0003824,GO:0004175,GO:0005575,GO:0005622,GO:0005623,GO:0005634,GO:0005737,GO:0006276,GO:0006323,GO:0006417,GO:0006464,GO:0006508,GO:0006807,GO:0006996,GO:0007049,GO:0007088,GO:0007093,GO:0007094,GO:0007346,GO:0008150,GO:0008152,GO:0008233,GO:0008234,GO:0009889,GO:0009987,GO:0010468,GO:0010494,GO:0010556,GO:0010564,GO:0010608,GO:0010639,GO:0010948,GO:0010965,GO:…	3.4.22.68	ko:K08596	-	-	-	-	ko00000,ko01000,ko01002,ko04121	-	-	-	Peptidase_C48	IPR023398	Translation Initiation factor eIF- 4e-like	1	1	1	1	1	1	1	1	2	1	2	1	2	1	1	2	2	1	1	1	0	1	1	1	1	1	1
OG0001506	63418.F2PQ96	0	1954	COG5160@1|root,KOG0779@2759|Eukaryota,38FW9@33154|Opisthokonta,3P3Y4@4751|Fungi,3QS83@4890|Ascomycota,20CBH@147545|Eurotiomycetes,3AZF3@33183|Onygenales,3FYJN@34384|Arthrodermataceae	4751|Fungi	O	Ulp1 protease family, C-terminal catalytic domain	-	GO:0000075,GO:0000278,GO:0003674,GO:0003824,GO:0004175,GO:0005575,GO:0005622,GO:0005623,GO:0005634,GO:0005737,GO:0006276,GO:0006323,GO:0006417,GO:0006464,GO:0006508,GO:0006807,GO:0006996,GO:0007049,GO:0007088,GO:0007093,GO:0007094,GO:0007346,GO:0008150,GO:0008152,GO:0008233,GO:0008234,GO:0009889,GO:0009987,GO:0010468,GO:0010494,GO:0010556,GO:0010564,GO:0010608,GO:0010639,GO:0010948,GO:0010965,GO:…	3.4.22.68	ko:K08596	-	-	-	-	ko00000,ko01000,ko01002,ko04121	-	-	-	Peptidase_C48	IPR051947	Sentrin-specific protease	1	1	1	1	1	1	1	1	2	1	2	1	2	1	1	2	2	1	1	1	0	1	1	1	1	1	1
OG0001654	552467.XP_003194809.1	2.56e-161	456	COG0638@1|root,KOG0178@2759|Eukaryota,38HA3@33154|Opisthokonta,3NVH4@4751|Fungi,3UZ6E@5204|Basidiomycota,3VE0E@5234|Tremellales	4751|Fungi	O	Proteasome subunit	PRE9	GO:0000502,GO:0005575,GO:0005622,GO:0005623,GO:0005634,GO:0005737,GO:0005829,GO:0005839,GO:0006508,GO:0006511,GO:0006807,GO:0007088,GO:0007346,GO:0008150,GO:0008152,GO:0009056,GO:0009057,GO:0009896,GO:0009987,GO:0010498,GO:0010499,GO:0010564,GO:0010638,GO:0010965,GO:0012505,GO:0016020,GO:0016043,GO:0019538,GO:0019773,GO:0019941,GO:0022607,GO:0030071,GO:0030163,GO:0031331,GO:0031597,GO:0032270,GO:…	3.4.25.1	ko:K02728	ko03050,map03050	M00337,M00340	-	-	ko00000,ko00001,ko00002,ko01000,ko01002,ko03051	-	-	-	Proteasome,Proteasome_A_N	IPR029055	Nucleophile aminohydrolases, N-terminal	1	1	1	1	1	1	1	1	1	1	2	1	1	1	1	2	2	1	1	1	1	1	1	1	1	1	1
OG0001654	552467.XP_003194809.1	2.56e-161	456	COG0638@1|root,KOG0178@2759|Eukaryota,38HA3@33154|Opisthokonta,3NVH4@4751|Fungi,3UZ6E@5204|Basidiomycota,3VE0E@5234|Tremellales	4751|Fungi	O	Proteasome subunit	PRE9	GO:0000502,GO:0005575,GO:0005622,GO:0005623,GO:0005634,GO:0005737,GO:0005829,GO:0005839,GO:0006508,GO:0006511,GO:0006807,GO:0007088,GO:0007346,GO:0008150,GO:0008152,GO:0009056,GO:0009057,GO:0009896,GO:0009987,GO:0010498,GO:0010499,GO:0010564,GO:0010638,GO:0010965,GO:0012505,GO:0016020,GO:0016043,GO:0019538,GO:0019773,GO:0019941,GO:0022607,GO:0030071,GO:0030163,GO:0031331,GO:0031597,GO:0032270,GO:…	3.4.25.1	ko:K02728	ko03050,map03050	M00337,M00340	-	-	ko00000,ko00001,ko00002,ko01000,ko01002,ko03051	-	-	-	Proteasome,Proteasome_A_N	IPR050115	Proteasome subunit alpha	1	1	1	1	1	1	1	1	1	1	2	1	1	1	1	2	2	1	1	1	1	1	1	1	1	1	1
OG0001656	5270.UM03777P0	1.64e-120	400	KOG1871@1|root,KOG1871@2759|Eukaryota,38D2C@33154|Opisthokonta,3NWFU@4751|Fungi,3UZHC@5204|Basidiomycota,3N3II@452284|Ustilaginomycotina	4751|Fungi	O	Belongs to the peptidase C19 family	-	GO:0003674,GO:0003676,GO:0003723,GO:0003729,GO:0003824,GO:0004843,GO:0005488,GO:0005575,GO:0005622,GO:0005623,GO:0005737,GO:0005829,GO:0006464,GO:0006508,GO:0006511,GO:0006515,GO:0006807,GO:0006914,GO:0006950,GO:0008150,GO:0008152,GO:0008233,GO:0008234,GO:0009056,GO:0009057,GO:0009987,GO:0010033,GO:0010494,GO:0010498,GO:0016236,GO:0016579,GO:0016787,GO:0019538,GO:0019783,GO:0019941,GO:0030163,GO:…	3.4.19.12	ko:K11841	ko04139,map04139	-	-	-	ko00000,ko00001,ko01000,ko01002,ko04121	-	-	-	UCH	IPR050164	Ubiquitin carboxyl-terminal hydrolases	1	1	1	1	1	1	1	1	1	1	2	1	2	2	1	2	1	1	1	1	0	1	1	1	1	1	1
OG0001656	5270.UM03777P0	1.64e-120	400	KOG1871@1|root,KOG1871@2759|Eukaryota,38D2C@33154|Opisthokonta,3NWFU@4751|Fungi,3UZHC@5204|Basidiomycota,3N3II@452284|Ustilaginomycotina	4751|Fungi	O	Belongs to the peptidase C19 family	-	GO:0003674,GO:0003676,GO:0003723,GO:0003729,GO:0003824,GO:0004843,GO:0005488,GO:0005575,GO:0005622,GO:0005623,GO:0005737,GO:0005829,GO:0006464,GO:0006508,GO:0006511,GO:0006515,GO:0006807,GO:0006914,GO:0006950,GO:0008150,GO:0008152,GO:0008233,GO:0008234,GO:0009056,GO:0009057,GO:0009987,GO:0010033,GO:0010494,GO:0010498,GO:0016236,GO:0016579,GO:0016787,GO:0019538,GO:0019783,GO:0019941,GO:0030163,GO:…	3.4.19.12	ko:K11841	ko04139,map04139	-	-	-	ko00000,ko00001,ko01000,ko01002,ko04121	-	-	-	UCH	IPR038765	Papain-like cysteine peptidase superfamily	1	1	1	1	1	1	1	1	1	1	2	1	2	2	1	2	1	1	1	1	0	1	1	1	1	1	1
OG0001656	5270.UM03777P0	1.64e-120	400	KOG1871@1|root,KOG1871@2759|Eukaryota,38D2C@33154|Opisthokonta,3NWFU@4751|Fungi,3UZHC@5204|Basidiomycota,3N3II@452284|Ustilaginomycotina	4751|Fungi	O	Belongs to the peptidase C19 family	-	GO:0003674,GO:0003676,GO:0003723,GO:0003729,GO:0003824,GO:0004843,GO:0005488,GO:0005575,GO:0005622,GO:0005623,GO:0005737,GO:0005829,GO:0006464,GO:0006508,GO:0006511,GO:0006515,GO:0006807,GO:0006914,GO:0006950,GO:0008150,GO:0008152,GO:0008233,GO:0008234,GO:0009056,GO:0009057,GO:0009987,GO:0010033,GO:0010494,GO:0010498,GO:0016236,GO:0016579,GO:0016787,GO:0019538,GO:0019783,GO:0019941,GO:0030163,GO:…	3.4.19.12	ko:K11841	ko04139,map04139	-	-	-	ko00000,ko00001,ko01000,ko01002,ko04121	-	-	-	UCH	IPR035979	RNA-binding domain superfamily	1	1	1	1	1	1	1	1	1	1	2	1	2	2	1	2	1	1	1	1	0	1	1	1	1	1	1
OG0001656	5270.UM03777P0	1.64e-120	400	KOG1871@1|root,KOG1871@2759|Eukaryota,38D2C@33154|Opisthokonta,3NWFU@4751|Fungi,3UZHC@5204|Basidiomycota,3N3II@452284|Ustilaginomycotina	4751|Fungi	O	Belongs to the peptidase C19 family	-	GO:0003674,GO:0003676,GO:0003723,GO:0003729,GO:0003824,GO:0004843,GO:0005488,GO:0005575,GO:0005622,GO:0005623,GO:0005737,GO:0005829,GO:0006464,GO:0006508,GO:0006511,GO:0006515,GO:0006807,GO:0006914,GO:0006950,GO:0008150,GO:0008152,GO:0008233,GO:0008234,GO:0009056,GO:0009057,GO:0009987,GO:0010033,GO:0010494,GO:0010498,GO:0016236,GO:0016579,GO:0016787,GO:0019538,GO:0019783,GO:0019941,GO:0030163,GO:…	3.4.19.12	ko:K11841	ko04139,map04139	-	-	-	ko00000,ko00001,ko01000,ko01002,ko04121	-	-	-	UCH	IPR036867	R3H domain superfamily	1	1	1	1	1	1	1	1	1	1	2	1	2	2	1	2	1	1	1	1	0	1	1	1	1	1	1
OG0001705	63400.XP_003017381.1	0	1877	COG5406@1|root,KOG1189@2759|Eukaryota,38CR6@33154|Opisthokonta,3NW09@4751|Fungi,3QK6Z@4890|Ascomycota,20FX9@147545|Eurotiomycetes,3B10I@33183|Onygenales,3FTUR@34384|Arthrodermataceae	4751|Fungi	E	FACT complex subunit spt16	SPT16	GO:0000228,GO:0000785,GO:0000790,GO:0003674,GO:0003682,GO:0005488,GO:0005515,GO:0005575,GO:0005622,GO:0005623,GO:0005634,GO:0005654,GO:0005657,GO:0005694,GO:0006139,GO:0006259,GO:0006260,GO:0006261,GO:0006323,GO:0006325,GO:0006333,GO:0006334,GO:0006338,GO:0006351,GO:0006354,GO:0006355,GO:0006357,GO:0006366,GO:0006368,GO:0006725,GO:0006807,GO:0006996,GO:0008023,GO:0008150,GO:0008152,GO:0009058,GO:…	3.4.11.9	ko:K01262	-	-	-	-	ko00000,ko01000,ko01002	-	-	-	FACT-Spt16_Nlob,Peptidase_M24,Rtt106,SPT16	IPR036005	Creatinase/aminopeptidase-like	1	1	1	1	1	1	1	1	1	1	2	1	2	1	1	2	1	1	1	1	1	1	1	1	1	1	1
OG0001705	63400.XP_003017381.1	0	1877	COG5406@1|root,KOG1189@2759|Eukaryota,38CR6@33154|Opisthokonta,3NW09@4751|Fungi,3QK6Z@4890|Ascomycota,20FX9@147545|Eurotiomycetes,3B10I@33183|Onygenales,3FTUR@34384|Arthrodermataceae	4751|Fungi	E	FACT complex subunit spt16	SPT16	GO:0000228,GO:0000785,GO:0000790,GO:0003674,GO:0003682,GO:0005488,GO:0005515,GO:0005575,GO:0005622,GO:0005623,GO:0005634,GO:0005654,GO:0005657,GO:0005694,GO:0006139,GO:0006259,GO:0006260,GO:0006261,GO:0006323,GO:0006325,GO:0006333,GO:0006334,GO:0006338,GO:0006351,GO:0006354,GO:0006355,GO:0006357,GO:0006366,GO:0006368,GO:0006725,GO:0006807,GO:0006996,GO:0008023,GO:0008150,GO:0008152,GO:0009058,GO:…	3.4.11.9	ko:K01262	-	-	-	-	ko00000,ko01000,ko01002	-	-	-	FACT-Spt16_Nlob,Peptidase_M24,Rtt106,SPT16	IPR040258	FACT complex subunit Spt16	1	1	1	1	1	1	1	1	1	1	2	1	2	1	1	2	1	1	1	1	1	1	1	1	1	1	1
OG0001711	64363.EME39502	8.17e-178	501	COG0638@1|root,KOG0184@2759|Eukaryota,38E3A@33154|Opisthokonta,3NU0E@4751|Fungi,3QK0X@4890|Ascomycota,1ZZTM@147541|Dothideomycetes,3MH2W@451867|Dothideomycetidae	4751|Fungi	O	Proteasome subunit alpha type	PRE10	GO:0000502,GO:0003674,GO:0003676,GO:0003723,GO:0003729,GO:0005488,GO:0005575,GO:0005622,GO:0005623,GO:0005634,GO:0005737,GO:0005829,GO:0005839,GO:0006508,GO:0006511,GO:0006807,GO:0007088,GO:0007346,GO:0008150,GO:0008152,GO:0009056,GO:0009057,GO:0009896,GO:0009987,GO:0010498,GO:0010499,GO:0010564,GO:0010638,GO:0010965,GO:0012505,GO:0016020,GO:0019538,GO:0019773,GO:0019941,GO:0030071,GO:0030163,GO:…	3.4.25.1	ko:K02727	ko03050,map03050	M00337,M00340	-	-	ko00000,ko00001,ko00002,ko01000,ko01002,ko03051	-	-	-	Proteasome,Proteasome_A_N	IPR050115	Proteasome subunit alpha	1	1	1	1	1	1	1	1	1	1	2	1	2	1	1	2	1	1	1	1	1	1	1	1	1	1	1
OG0001711	64363.EME39502	8.17e-178	501	COG0638@1|root,KOG0184@2759|Eukaryota,38E3A@33154|Opisthokonta,3NU0E@4751|Fungi,3QK0X@4890|Ascomycota,1ZZTM@147541|Dothideomycetes,3MH2W@451867|Dothideomycetidae	4751|Fungi	O	Proteasome subunit alpha type	PRE10	GO:0000502,GO:0003674,GO:0003676,GO:0003723,GO:0003729,GO:0005488,GO:0005575,GO:0005622,GO:0005623,GO:0005634,GO:0005737,GO:0005829,GO:0005839,GO:0006508,GO:0006511,GO:0006807,GO:0007088,GO:0007346,GO:0008150,GO:0008152,GO:0009056,GO:0009057,GO:0009896,GO:0009987,GO:0010498,GO:0010499,GO:0010564,GO:0010638,GO:0010965,GO:0012505,GO:0016020,GO:0019538,GO:0019773,GO:0019941,GO:0030071,GO:0030163,GO:…	3.4.25.1	ko:K02727	ko03050,map03050	M00337,M00340	-	-	ko00000,ko00001,ko00002,ko01000,ko01002,ko03051	-	-	-	Proteasome,Proteasome_A_N	IPR029055	Nucleophile aminohydrolases, N-terminal	1	1	1	1	1	1	1	1	1	1	2	1	2	1	1	2	1	1	1	1	1	1	1	1	1	1	1
OG0001813	120017.I2FPF6	1.8e-123	361	COG0638@1|root,KOG0182@2759|Eukaryota,38C7B@33154|Opisthokonta,3NUBK@4751|Fungi,3UYK9@5204|Basidiomycota,3MZK3@452284|Ustilaginomycotina	4751|Fungi	O	Proteasome subunit A N-terminal signature Add an annotation	SCL1	GO:0000502,GO:0005575,GO:0005622,GO:0005623,GO:0005634,GO:0005737,GO:0005739,GO:0005829,GO:0005839,GO:0006508,GO:0006511,GO:0006807,GO:0007088,GO:0007346,GO:0008150,GO:0008152,GO:0009056,GO:0009057,GO:0009896,GO:0009987,GO:0010498,GO:0010499,GO:0010564,GO:0010638,GO:0010965,GO:0012505,GO:0016020,GO:0019538,GO:0019773,GO:0019941,GO:0030071,GO:0030163,GO:0031331,GO:0031597,GO:0032270,GO:0032436,GO:…	3.4.25.1	ko:K02730	ko03050,map03050	M00337,M00340	-	-	ko00000,ko00001,ko00002,ko01000,ko01002,ko03051	-	-	-	Proteasome,Proteasome_A_N	IPR029055	Nucleophile aminohydrolases, N-terminal	1	1	1	1	1	1	1	1	1	1	2	1	2	1	1	2	1	1	1	1	1	1	1	1	1	1	1
OG0001813	120017.I2FPF6	1.8e-123	361	COG0638@1|root,KOG0182@2759|Eukaryota,38C7B@33154|Opisthokonta,3NUBK@4751|Fungi,3UYK9@5204|Basidiomycota,3MZK3@452284|Ustilaginomycotina	4751|Fungi	O	Proteasome subunit A N-terminal signature Add an annotation	SCL1	GO:0000502,GO:0005575,GO:0005622,GO:0005623,GO:0005634,GO:0005737,GO:0005739,GO:0005829,GO:0005839,GO:0006508,GO:0006511,GO:0006807,GO:0007088,GO:0007346,GO:0008150,GO:0008152,GO:0009056,GO:0009057,GO:0009896,GO:0009987,GO:0010498,GO:0010499,GO:0010564,GO:0010638,GO:0010965,GO:0012505,GO:0016020,GO:0019538,GO:0019773,GO:0019941,GO:0030071,GO:0030163,GO:0031331,GO:0031597,GO:0032270,GO:0032436,GO:…	3.4.25.1	ko:K02730	ko03050,map03050	M00337,M00340	-	-	ko00000,ko00001,ko00002,ko01000,ko01002,ko03051	-	-	-	Proteasome,Proteasome_A_N	IPR050115	Proteasome subunit alpha	1	1	1	1	1	1	1	1	1	1	2	1	2	1	1	2	1	1	1	1	1	1	1	1	1	1	1
OG0001838	1392244.V5GVJ0	2e-230	680	COG5207@1|root,KOG0944@2759|Eukaryota,38CE9@33154|Opisthokonta,3NX3U@4751|Fungi,3UY24@5204|Basidiomycota,3N2X5@452284|Ustilaginomycotina	4751|Fungi	O	Ubiquitin Carboxyl-terminal Hydrolase-like zinc finger	ubp14	GO:0003674,GO:0003824,GO:0004843,GO:0005575,GO:0005622,GO:0005623,GO:0005737,GO:0006109,GO:0006111,GO:0006508,GO:0006511,GO:0006807,GO:0008150,GO:0008152,GO:0008233,GO:0008234,GO:0009056,GO:0009057,GO:0009889,GO:0009890,GO:0009892,GO:0009987,GO:0010498,GO:0010675,GO:0010677,GO:0010906,GO:0016787,GO:0019222,GO:0019538,GO:0019783,GO:0019941,GO:0030163,GO:0031323,GO:0031324,GO:0031326,GO:0031327,GO:…	3.4.19.12	ko:K11836	-	-	-	-	ko00000,ko01000,ko01002,ko04147	-	-	-	UBA,UCH,UCH_1,zf-UBP	IPR038765	Papain-like cysteine peptidase superfamily	1	1	1	1	1	1	1	1	1	1	2	1	2	1	1	2	1	1	1	1	1	1	1	1	1	1	1
OG0001838	1392244.V5GVJ0	2e-230	680	COG5207@1|root,KOG0944@2759|Eukaryota,38CE9@33154|Opisthokonta,3NX3U@4751|Fungi,3UY24@5204|Basidiomycota,3N2X5@452284|Ustilaginomycotina	4751|Fungi	O	Ubiquitin Carboxyl-terminal Hydrolase-like zinc finger	ubp14	GO:0003674,GO:0003824,GO:0004843,GO:0005575,GO:0005622,GO:0005623,GO:0005737,GO:0006109,GO:0006111,GO:0006508,GO:0006511,GO:0006807,GO:0008150,GO:0008152,GO:0008233,GO:0008234,GO:0009056,GO:0009057,GO:0009889,GO:0009890,GO:0009892,GO:0009987,GO:0010498,GO:0010675,GO:0010677,GO:0010906,GO:0016787,GO:0019222,GO:0019538,GO:0019783,GO:0019941,GO:0030163,GO:0031323,GO:0031324,GO:0031326,GO:0031327,GO:…	3.4.19.12	ko:K11836	-	-	-	-	ko00000,ko01000,ko01002,ko04147	-	-	-	UBA,UCH,UCH_1,zf-UBP	IPR009060	UBA-like superfamily	1	1	1	1	1	1	1	1	1	1	2	1	2	1	1	2	1	1	1	1	1	1	1	1	1	1	1
OG0001838	1392244.V5GVJ0	2e-230	680	COG5207@1|root,KOG0944@2759|Eukaryota,38CE9@33154|Opisthokonta,3NX3U@4751|Fungi,3UY24@5204|Basidiomycota,3N2X5@452284|Ustilaginomycotina	4751|Fungi	O	Ubiquitin Carboxyl-terminal Hydrolase-like zinc finger	ubp14	GO:0003674,GO:0003824,GO:0004843,GO:0005575,GO:0005622,GO:0005623,GO:0005737,GO:0006109,GO:0006111,GO:0006508,GO:0006511,GO:0006807,GO:0008150,GO:0008152,GO:0008233,GO:0008234,GO:0009056,GO:0009057,GO:0009889,GO:0009890,GO:0009892,GO:0009987,GO:0010498,GO:0010675,GO:0010677,GO:0010906,GO:0016787,GO:0019222,GO:0019538,GO:0019783,GO:0019941,GO:0030163,GO:0031323,GO:0031324,GO:0031326,GO:0031327,GO:…	3.4.19.12	ko:K11836	-	-	-	-	ko00000,ko01000,ko01002,ko04147	-	-	-	UBA,UCH,UCH_1,zf-UBP	IPR001837	Adenylate cyclase-associated CAP	1	1	1	1	1	1	1	1	1	1	2	1	2	1	1	2	1	1	1	1	1	1	1	1	1	1	1
OG0001838	1392244.V5GVJ0	2e-230	680	COG5207@1|root,KOG0944@2759|Eukaryota,38CE9@33154|Opisthokonta,3NX3U@4751|Fungi,3UY24@5204|Basidiomycota,3N2X5@452284|Ustilaginomycotina	4751|Fungi	O	Ubiquitin Carboxyl-terminal Hydrolase-like zinc finger	ubp14	GO:0003674,GO:0003824,GO:0004843,GO:0005575,GO:0005622,GO:0005623,GO:0005737,GO:0006109,GO:0006111,GO:0006508,GO:0006511,GO:0006807,GO:0008150,GO:0008152,GO:0008233,GO:0008234,GO:0009056,GO:0009057,GO:0009889,GO:0009890,GO:0009892,GO:0009987,GO:0010498,GO:0010675,GO:0010677,GO:0010906,GO:0016787,GO:0019222,GO:0019538,GO:0019783,GO:0019941,GO:0030163,GO:0031323,GO:0031324,GO:0031326,GO:0031327,GO:…	3.4.19.12	ko:K11836	-	-	-	-	ko00000,ko01000,ko01002,ko04147	-	-	-	UBA,UCH,UCH_1,zf-UBP	IPR036223	Adenylate cyclase-associated CAP, C-terminal superfamily	1	1	1	1	1	1	1	1	1	1	2	1	2	1	1	2	1	1	1	1	1	1	1	1	1	1	1
OG0001901	84751.XP_007880004.1	2.65e-148	428	COG0638@1|root,KOG0175@2759|Eukaryota,38EKC@33154|Opisthokonta,3NXDJ@4751|Fungi,3UYE9@5204|Basidiomycota,3N2FA@452284|Ustilaginomycotina	4751|Fungi	O	Proteasome subunit	PRE2	GO:0000502,GO:0003674,GO:0003824,GO:0004175,GO:0005575,GO:0005622,GO:0005623,GO:0005634,GO:0005737,GO:0005783,GO:0005789,GO:0005829,GO:0005839,GO:0006508,GO:0006511,GO:0006807,GO:0007088,GO:0007346,GO:0008150,GO:0008152,GO:0008233,GO:0009056,GO:0009057,GO:0009896,GO:0009987,GO:0010498,GO:0010499,GO:0010564,GO:0010638,GO:0010965,GO:0012505,GO:0016020,GO:0016043,GO:0016787,GO:0019538,GO:0019774,GO:…	3.4.25.1	ko:K02737	ko03050,map03050	M00340	-	-	ko00000,ko00001,ko00002,ko01000,ko01002,ko03051	-	-	-	Proteasome	IPR023333	Proteasome B-type subunit	1	1	1	1	1	1	1	1	1	1	2	1	1	1	1	1	2	1	1	1	1	1	1	1	1	1	1
OG0001901	84751.XP_007880004.1	2.65e-148	428	COG0638@1|root,KOG0175@2759|Eukaryota,38EKC@33154|Opisthokonta,3NXDJ@4751|Fungi,3UYE9@5204|Basidiomycota,3N2FA@452284|Ustilaginomycotina	4751|Fungi	O	Proteasome subunit	PRE2	GO:0000502,GO:0003674,GO:0003824,GO:0004175,GO:0005575,GO:0005622,GO:0005623,GO:0005634,GO:0005737,GO:0005783,GO:0005789,GO:0005829,GO:0005839,GO:0006508,GO:0006511,GO:0006807,GO:0007088,GO:0007346,GO:0008150,GO:0008152,GO:0008233,GO:0009056,GO:0009057,GO:0009896,GO:0009987,GO:0010498,GO:0010499,GO:0010564,GO:0010638,GO:0010965,GO:0012505,GO:0016020,GO:0016043,GO:0016787,GO:0019538,GO:0019774,GO:…	3.4.25.1	ko:K02737	ko03050,map03050	M00340	-	-	ko00000,ko00001,ko00002,ko01000,ko01002,ko03051	-	-	-	Proteasome	IPR029055	Nucleophile aminohydrolases, N-terminal	1	1	1	1	1	1	1	1	1	1	2	1	1	1	1	1	2	1	1	1	1	1	1	1	1	1	1
OG0002044	1047171.Mycgr3P66573	3.19e-181	506	KOG0181@1|root,KOG0181@2759|Eukaryota,38DNP@33154|Opisthokonta,3NTZH@4751|Fungi,3QKWB@4890|Ascomycota,1ZZ00@147541|Dothideomycetes,3MFY5@451867|Dothideomycetidae	4751|Fungi	O	Proteasome subunit alpha type	PRE8	GO:0000502,GO:0005575,GO:0005622,GO:0005623,GO:0005634,GO:0005737,GO:0005829,GO:0005839,GO:0006508,GO:0006511,GO:0006807,GO:0007088,GO:0007346,GO:0008150,GO:0008152,GO:0009056,GO:0009057,GO:0009896,GO:0009987,GO:0010498,GO:0010499,GO:0010564,GO:0010638,GO:0010965,GO:0012505,GO:0016020,GO:0019538,GO:0019773,GO:0019941,GO:0030071,GO:0030163,GO:0031331,GO:0031597,GO:0032270,GO:0032436,GO:0032991,GO:…	3.4.25.1	ko:K02726	ko03050,map03050	M00337,M00340	-	-	ko00000,ko00001,ko00002,ko01000,ko01002,ko03051	-	-	-	Proteasome,Proteasome_A_N	IPR050115	Proteasome subunit alpha	1	1	0	1	1	1	1	1	1	1	2	1	2	1	1	1	1	1	1	1	1	1	1	1	1	1	1
OG0002044	1047171.Mycgr3P66573	3.19e-181	506	KOG0181@1|root,KOG0181@2759|Eukaryota,38DNP@33154|Opisthokonta,3NTZH@4751|Fungi,3QKWB@4890|Ascomycota,1ZZ00@147541|Dothideomycetes,3MFY5@451867|Dothideomycetidae	4751|Fungi	O	Proteasome subunit alpha type	PRE8	GO:0000502,GO:0005575,GO:0005622,GO:0005623,GO:0005634,GO:0005737,GO:0005829,GO:0005839,GO:0006508,GO:0006511,GO:0006807,GO:0007088,GO:0007346,GO:0008150,GO:0008152,GO:0009056,GO:0009057,GO:0009896,GO:0009987,GO:0010498,GO:0010499,GO:0010564,GO:0010638,GO:0010965,GO:0012505,GO:0016020,GO:0019538,GO:0019773,GO:0019941,GO:0030071,GO:0030163,GO:0031331,GO:0031597,GO:0032270,GO:0032436,GO:0032991,GO:…	3.4.25.1	ko:K02726	ko03050,map03050	M00337,M00340	-	-	ko00000,ko00001,ko00002,ko01000,ko01002,ko03051	-	-	-	Proteasome,Proteasome_A_N	IPR029055	Nucleophile aminohydrolases, N-terminal	1	1	0	1	1	1	1	1	1	1	2	1	2	1	1	1	1	1	1	1	1	1	1	1	1	1	1
OG0002079	5478.XP_447358.1	2.67e-178	497	COG0638@1|root,KOG0176@2759|Eukaryota,38CVS@33154|Opisthokonta,3NWYW@4751|Fungi,3QJKC@4890|Ascomycota,3RR8Q@4891|Saccharomycetes,3RXZD@4893|Saccharomycetaceae	4751|Fungi	O	Belongs to the peptidase T1A family	PUP2	GO:0000502,GO:0005575,GO:0005622,GO:0005623,GO:0005634,GO:0005737,GO:0005829,GO:0005839,GO:0006508,GO:0006511,GO:0006807,GO:0007088,GO:0007346,GO:0008150,GO:0008152,GO:0009056,GO:0009057,GO:0009896,GO:0009987,GO:0010498,GO:0010499,GO:0010564,GO:0010638,GO:0010965,GO:0012505,GO:0016020,GO:0019538,GO:0019773,GO:0019941,GO:0030071,GO:0030163,GO:0031331,GO:0031597,GO:0032270,GO:0032436,GO:0032991,GO:…	3.4.25.1	ko:K02729	ko03050,map03050	M00337,M00340	-	-	ko00000,ko00001,ko00002,ko01000,ko01002,ko03051	-	-	-	Proteasome,Proteasome_A_N	IPR029055	Nucleophile aminohydrolases, N-terminal	1	1	1	1	1	1	1	1	1	1	1	1	1	1	1	1	2	1	1	1	1	1	1	1	1	1	1
OG0002079	5478.XP_447358.1	2.67e-178	497	COG0638@1|root,KOG0176@2759|Eukaryota,38CVS@33154|Opisthokonta,3NWYW@4751|Fungi,3QJKC@4890|Ascomycota,3RR8Q@4891|Saccharomycetes,3RXZD@4893|Saccharomycetaceae	4751|Fungi	O	Belongs to the peptidase T1A family	PUP2	GO:0000502,GO:0005575,GO:0005622,GO:0005623,GO:0005634,GO:0005737,GO:0005829,GO:0005839,GO:0006508,GO:0006511,GO:0006807,GO:0007088,GO:0007346,GO:0008150,GO:0008152,GO:0009056,GO:0009057,GO:0009896,GO:0009987,GO:0010498,GO:0010499,GO:0010564,GO:0010638,GO:0010965,GO:0012505,GO:0016020,GO:0019538,GO:0019773,GO:0019941,GO:0030071,GO:0030163,GO:0031331,GO:0031597,GO:0032270,GO:0032436,GO:0032991,GO:…	3.4.25.1	ko:K02729	ko03050,map03050	M00337,M00340	-	-	ko00000,ko00001,ko00002,ko01000,ko01002,ko03051	-	-	-	Proteasome,Proteasome_A_N	IPR050115	Proteasome subunit alpha	1	1	1	1	1	1	1	1	1	1	1	1	1	1	1	1	2	1	1	1	1	1	1	1	1	1	1
OG0002098	264951.V5FNK1	7.62e-199	570	KOG0185@1|root,KOG0185@2759|Eukaryota,38G4U@33154|Opisthokonta,3NUK4@4751|Fungi,3QJEW@4890|Ascomycota,20FSG@147545|Eurotiomycetes,3S3BH@5042|Eurotiales	4751|Fungi	O	Proteasome subunit beta	PRE4	GO:0000502,GO:0005575,GO:0005622,GO:0005623,GO:0005634,GO:0005737,GO:0005783,GO:0005789,GO:0005829,GO:0005839,GO:0006508,GO:0006511,GO:0006807,GO:0007088,GO:0007346,GO:0008150,GO:0008152,GO:0009056,GO:0009057,GO:0009896,GO:0009987,GO:0010498,GO:0010499,GO:0010564,GO:0010638,GO:0010965,GO:0012505,GO:0016020,GO:0016043,GO:0019538,GO:0019774,GO:0019941,GO:0022607,GO:0030071,GO:0030163,GO:0031331,GO:…	3.4.25.1	ko:K02736	ko03050,map03050	M00337,M00340	-	-	ko00000,ko00001,ko00002,ko01000,ko01002,ko03051	-	-	-	Proteasome	IPR023333	Proteasome B-type subunit	1	1	1	1	1	1	1	1	1	1	1	1	2	1	1	2	1	1	0	0	1	1	1	1	1	1	1
OG0002098	264951.V5FNK1	7.62e-199	570	KOG0185@1|root,KOG0185@2759|Eukaryota,38G4U@33154|Opisthokonta,3NUK4@4751|Fungi,3QJEW@4890|Ascomycota,20FSG@147545|Eurotiomycetes,3S3BH@5042|Eurotiales	4751|Fungi	O	Proteasome subunit beta	PRE4	GO:0000502,GO:0005575,GO:0005622,GO:0005623,GO:0005634,GO:0005737,GO:0005783,GO:0005789,GO:0005829,GO:0005839,GO:0006508,GO:0006511,GO:0006807,GO:0007088,GO:0007346,GO:0008150,GO:0008152,GO:0009056,GO:0009057,GO:0009896,GO:0009987,GO:0010498,GO:0010499,GO:0010564,GO:0010638,GO:0010965,GO:0012505,GO:0016020,GO:0016043,GO:0019538,GO:0019774,GO:0019941,GO:0022607,GO:0030071,GO:0030163,GO:0031331,GO:…	3.4.25.1	ko:K02736	ko03050,map03050	M00337,M00340	-	-	ko00000,ko00001,ko00002,ko01000,ko01002,ko03051	-	-	-	Proteasome	IPR029055	Nucleophile aminohydrolases, N-terminal	1	1	1	1	1	1	1	1	1	1	1	1	2	1	1	2	1	1	0	0	1	1	1	1	1	1	1
OG0002143	120017.I2FMB5	4.94e-230	680	COG0339@1|root,KOG2090@2759|Eukaryota,38FWV@33154|Opisthokonta,3NU5K@4751|Fungi,3UZDG@5204|Basidiomycota,3N2VD@452284|Ustilaginomycotina	4751|Fungi	O	Mitochondrial intermediate peptidase	OCT1	GO:0003674,GO:0003824,GO:0004175,GO:0004222,GO:0005575,GO:0005622,GO:0005623,GO:0005737,GO:0005739,GO:0005759,GO:0006508,GO:0006518,GO:0006605,GO:0006626,GO:0006627,GO:0006807,GO:0006810,GO:0006839,GO:0006873,GO:0006875,GO:0006879,GO:0006886,GO:0006996,GO:0007005,GO:0008104,GO:0008150,GO:0008152,GO:0008233,GO:0008237,GO:0009987,GO:0010467,GO:0015031,GO:0015833,GO:0016043,GO:0016485,GO:0016787,GO:…	3.4.24.59	ko:K01410	-	-	-	-	ko00000,ko01000,ko01002,ko03029	-	-	-	Peptidase_M3	IPR036249	Thioredoxin-like superfamily	1	1	1	1	1	1	1	1	1	1	2	1	2	1	1	1	1	1	0	0	1	1	1	1	1	1	1
OG0002143	120017.I2FMB5	4.94e-230	680	COG0339@1|root,KOG2090@2759|Eukaryota,38FWV@33154|Opisthokonta,3NU5K@4751|Fungi,3UZDG@5204|Basidiomycota,3N2VD@452284|Ustilaginomycotina	4751|Fungi	O	Mitochondrial intermediate peptidase	OCT1	GO:0003674,GO:0003824,GO:0004175,GO:0004222,GO:0005575,GO:0005622,GO:0005623,GO:0005737,GO:0005739,GO:0005759,GO:0006508,GO:0006518,GO:0006605,GO:0006626,GO:0006627,GO:0006807,GO:0006810,GO:0006839,GO:0006873,GO:0006875,GO:0006879,GO:0006886,GO:0006996,GO:0007005,GO:0008104,GO:0008150,GO:0008152,GO:0008233,GO:0008237,GO:0009987,GO:0010467,GO:0015031,GO:0015833,GO:0016043,GO:0016485,GO:0016787,GO:…	3.4.24.59	ko:K01410	-	-	-	-	ko00000,ko01000,ko01002,ko03029	-	-	-	Peptidase_M3	IPR045090	Peptidase M3A/M3B	1	1	1	1	1	1	1	1	1	1	2	1	2	1	1	1	1	1	0	0	1	1	1	1	1	1	1
OG0002152	5480.G8BHE2	4.84e-291	805	KOG1339@1|root,KOG1339@2759|Eukaryota,38H0T@33154|Opisthokonta,3NXPH@4751|Fungi,3QPMT@4890|Ascomycota,3RRIR@4891|Saccharomycetes,47B3A@766764|Debaryomycetaceae	4751|Fungi	O	Belongs to the peptidase A1 family	BAR1	GO:0000322,GO:0000323,GO:0000324,GO:0000749,GO:0000754,GO:0001402,GO:0003674,GO:0003824,GO:0004175,GO:0004190,GO:0005575,GO:0005576,GO:0005618,GO:0005622,GO:0005623,GO:0005737,GO:0005773,GO:0005886,GO:0006508,GO:0006518,GO:0006807,GO:0007154,GO:0007165,GO:0007323,GO:0008150,GO:0008152,GO:0008233,GO:0009056,GO:0009057,GO:0009277,GO:0009897,GO:0009966,GO:0009986,GO:0009987,GO:0010033,GO:0010467,GO:…	3.4.23.24,3.4.23.35,3.4.23.41	ko:K01383,ko:K06005,ko:K06009	ko04011,map04011	-	-	-	ko00000,ko00001,ko01000,ko01002,ko03110	-	-	-	Asp	IPR021109	Aspartic peptidase domain superfamily	1	1	1	1	1	1	1	1	1	1	2	1	2	1	1	1	1	1	1	1	1	1	1	1	1	1	1
OG0002152	5480.G8BHE2	4.84e-291	805	KOG1339@1|root,KOG1339@2759|Eukaryota,38H0T@33154|Opisthokonta,3NXPH@4751|Fungi,3QPMT@4890|Ascomycota,3RRIR@4891|Saccharomycetes,47B3A@766764|Debaryomycetaceae	4751|Fungi	O	Belongs to the peptidase A1 family	BAR1	GO:0000322,GO:0000323,GO:0000324,GO:0000749,GO:0000754,GO:0001402,GO:0003674,GO:0003824,GO:0004175,GO:0004190,GO:0005575,GO:0005576,GO:0005618,GO:0005622,GO:0005623,GO:0005737,GO:0005773,GO:0005886,GO:0006508,GO:0006518,GO:0006807,GO:0007154,GO:0007165,GO:0007323,GO:0008150,GO:0008152,GO:0008233,GO:0009056,GO:0009057,GO:0009277,GO:0009897,GO:0009966,GO:0009986,GO:0009987,GO:0010033,GO:0010467,GO:…	3.4.23.24,3.4.23.35,3.4.23.41	ko:K01383,ko:K06005,ko:K06009	ko04011,map04011	-	-	-	ko00000,ko00001,ko01000,ko01002,ko03110	-	-	-	Asp	IPR001461	Aspartic peptidase A1	1	1	1	1	1	1	1	1	1	1	2	1	2	1	1	1	1	1	1	1	1	1	1	1	1	1	1
OG0002188	63402.XP_003171688.1	0	1112	COG0612@1|root,KOG2067@2759|Eukaryota,38BUY@33154|Opisthokonta,3NV1J@4751|Fungi,3QK91@4890|Ascomycota,20CQN@147545|Eurotiomycetes,3B1T0@33183|Onygenales,3FUVN@34384|Arthrodermataceae	4751|Fungi	O	Belongs to the peptidase M16 family	MAS2	GO:0003674,GO:0003824,GO:0004175,GO:0004222,GO:0005488,GO:0005575,GO:0005622,GO:0005623,GO:0005737,GO:0005739,GO:0005740,GO:0005743,GO:0005759,GO:0006508,GO:0006605,GO:0006626,GO:0006627,GO:0006807,GO:0006810,GO:0006839,GO:0006886,GO:0006996,GO:0007005,GO:0008104,GO:0008150,GO:0008152,GO:0008233,GO:0008237,GO:0008270,GO:0009987,GO:0010467,GO:0015031,GO:0015833,GO:0016020,GO:0016043,GO:0016485,GO:…	3.4.24.64	ko:K01412	-	-	-	-	ko00000,ko01000,ko01002,ko03029	-	-	-	Peptidase_M16,Peptidase_M16_C	IPR011249	Metalloenzyme, LuxS/M16 peptidase-like	0	0	0	1	1	1	1	1	1	1	2	2	1	1	1	2	2	1	1	1	1	1	1	1	1	1	1
OG0002188	63402.XP_003171688.1	0	1112	COG0612@1|root,KOG2067@2759|Eukaryota,38BUY@33154|Opisthokonta,3NV1J@4751|Fungi,3QK91@4890|Ascomycota,20CQN@147545|Eurotiomycetes,3B1T0@33183|Onygenales,3FUVN@34384|Arthrodermataceae	4751|Fungi	O	Belongs to the peptidase M16 family	MAS2	GO:0003674,GO:0003824,GO:0004175,GO:0004222,GO:0005488,GO:0005575,GO:0005622,GO:0005623,GO:0005737,GO:0005739,GO:0005740,GO:0005743,GO:0005759,GO:0006508,GO:0006605,GO:0006626,GO:0006627,GO:0006807,GO:0006810,GO:0006839,GO:0006886,GO:0006996,GO:0007005,GO:0008104,GO:0008150,GO:0008152,GO:0008233,GO:0008237,GO:0008270,GO:0009987,GO:0010467,GO:0015031,GO:0015833,GO:0016020,GO:0016043,GO:0016485,GO:…	3.4.24.64	ko:K01412	-	-	-	-	ko00000,ko01000,ko01002,ko03029	-	-	-	Peptidase_M16,Peptidase_M16_C	IPR050361	Mitochondrial Processing Peptidase/Ubiquinol-cytochrome c Reductase Complex	0	0	0	1	1	1	1	1	1	1	2	2	1	1	1	2	2	1	1	1	1	1	1	1	1	1	1
OG0002188	63402.XP_003171688.1	0	1112	COG0612@1|root,KOG2067@2759|Eukaryota,38BUY@33154|Opisthokonta,3NV1J@4751|Fungi,3QK91@4890|Ascomycota,20CQN@147545|Eurotiomycetes,3B1T0@33183|Onygenales,3FUVN@34384|Arthrodermataceae	4751|Fungi	O	Belongs to the peptidase M16 family	MAS2	GO:0003674,GO:0003824,GO:0004175,GO:0004222,GO:0005488,GO:0005575,GO:0005622,GO:0005623,GO:0005737,GO:0005739,GO:0005740,GO:0005743,GO:0005759,GO:0006508,GO:0006605,GO:0006626,GO:0006627,GO:0006807,GO:0006810,GO:0006839,GO:0006886,GO:0006996,GO:0007005,GO:0008104,GO:0008150,GO:0008152,GO:0008233,GO:0008237,GO:0008270,GO:0009987,GO:0010467,GO:0015031,GO:0015833,GO:0016020,GO:0016043,GO:0016485,GO:…	3.4.24.64	ko:K01412	-	-	-	-	ko00000,ko01000,ko01002,ko03029	-	-	-	Peptidase_M16,Peptidase_M16_C	IPR011249	Metalloenzyme, LuxS/M16 peptidase-like	0	0	0	1	1	1	1	1	1	1	2	2	1	1	1	2	2	1	1	1	1	1	1	1	1	1	1
OG0002197	82508.K1VRV8	8.59e-159	447	COG0638@1|root,KOG0177@2759|Eukaryota,38EGF@33154|Opisthokonta,3NX90@4751|Fungi,3UZZH@5204|Basidiomycota,3VCQK@5234|Tremellales	4751|Fungi	O	Proteasome subunit beta	PRE1	GO:0000502,GO:0003674,GO:0005575,GO:0005622,GO:0005623,GO:0005634,GO:0005737,GO:0005783,GO:0005789,GO:0005829,GO:0005839,GO:0006508,GO:0006511,GO:0006807,GO:0007088,GO:0007346,GO:0008047,GO:0008150,GO:0008152,GO:0009056,GO:0009057,GO:0009893,GO:0009896,GO:0009987,GO:0010498,GO:0010499,GO:0010564,GO:0010604,GO:0010638,GO:0010950,GO:0010952,GO:0010965,GO:0012505,GO:0016020,GO:0016504,GO:0019222,GO:…	3.4.25.1	ko:K02734	ko03050,map03050	M00337,M00340	-	-	ko00000,ko00001,ko00002,ko01000,ko01002,ko03051	-	-	-	Proteasome	IPR050115	Proteasome subunit alpha	1	1	1	1	1	1	1	1	1	1	2	1	2	1	1	1	1	1	1	1	1	1	1	1	1	1	0
OG0002197	82508.K1VRV8	8.59e-159	447	COG0638@1|root,KOG0177@2759|Eukaryota,38EGF@33154|Opisthokonta,3NX90@4751|Fungi,3UZZH@5204|Basidiomycota,3VCQK@5234|Tremellales	4751|Fungi	O	Proteasome subunit beta	PRE1	GO:0000502,GO:0003674,GO:0005575,GO:0005622,GO:0005623,GO:0005634,GO:0005737,GO:0005783,GO:0005789,GO:0005829,GO:0005839,GO:0006508,GO:0006511,GO:0006807,GO:0007088,GO:0007346,GO:0008047,GO:0008150,GO:0008152,GO:0009056,GO:0009057,GO:0009893,GO:0009896,GO:0009987,GO:0010498,GO:0010499,GO:0010564,GO:0010604,GO:0010638,GO:0010950,GO:0010952,GO:0010965,GO:0012505,GO:0016020,GO:0016504,GO:0019222,GO:…	3.4.25.1	ko:K02734	ko03050,map03050	M00337,M00340	-	-	ko00000,ko00001,ko00002,ko01000,ko01002,ko03051	-	-	-	Proteasome	IPR029055	Nucleophile aminohydrolases, N-terminal	1	1	1	1	1	1	1	1	1	1	2	1	2	1	1	1	1	1	1	1	1	1	1	1	1	1	0
OG0002231	84751.XP_007880909.1	3.55e-136	399	COG0638@1|root,KOG0183@2759|Eukaryota,38CHW@33154|Opisthokonta,3NWE5@4751|Fungi,3UY3E@5204|Basidiomycota,3N3IR@452284|Ustilaginomycotina	4751|Fungi	O	Proteasome subunit A N-terminal signature Add an annotation	PRE6	GO:0000502,GO:0005575,GO:0005622,GO:0005623,GO:0005634,GO:0005737,GO:0005739,GO:0005829,GO:0005839,GO:0006508,GO:0006511,GO:0006807,GO:0007088,GO:0007346,GO:0008150,GO:0008152,GO:0009056,GO:0009057,GO:0009896,GO:0009987,GO:0010498,GO:0010499,GO:0010564,GO:0010638,GO:0010965,GO:0012505,GO:0016020,GO:0019538,GO:0019773,GO:0019941,GO:0030071,GO:0030163,GO:0031331,GO:0031597,GO:0031974,GO:0031981,GO:…	3.4.25.1	ko:K02731	ko03050,map03050	M00337,M00340	-	-	ko00000,ko00001,ko00002,ko01000,ko01002,ko03051,ko04131	-	-	-	Proteasome,Proteasome_A_N	IPR050115	Proteasome subunit alpha	1	1	0	1	1	1	1	1	1	1	2	1	0	1	1	2	1	1	1	1	1	1	1	1	1	1	1
OG0002231	84751.XP_007880909.1	3.55e-136	399	COG0638@1|root,KOG0183@2759|Eukaryota,38CHW@33154|Opisthokonta,3NWE5@4751|Fungi,3UY3E@5204|Basidiomycota,3N3IR@452284|Ustilaginomycotina	4751|Fungi	O	Proteasome subunit A N-terminal signature Add an annotation	PRE6	GO:0000502,GO:0005575,GO:0005622,GO:0005623,GO:0005634,GO:0005737,GO:0005739,GO:0005829,GO:0005839,GO:0006508,GO:0006511,GO:0006807,GO:0007088,GO:0007346,GO:0008150,GO:0008152,GO:0009056,GO:0009057,GO:0009896,GO:0009987,GO:0010498,GO:0010499,GO:0010564,GO:0010638,GO:0010965,GO:0012505,GO:0016020,GO:0019538,GO:0019773,GO:0019941,GO:0030071,GO:0030163,GO:0031331,GO:0031597,GO:0031974,GO:0031981,GO:…	3.4.25.1	ko:K02731	ko03050,map03050	M00337,M00340	-	-	ko00000,ko00001,ko00002,ko01000,ko01002,ko03051,ko04131	-	-	-	Proteasome,Proteasome_A_N	IPR029055	Nucleophile aminohydrolases, N-terminal	1	1	0	1	1	1	1	1	1	1	2	1	0	1	1	2	1	1	1	1	1	1	1	1	1	1	1
OG0002398	82508.K1VJ77	4.33e-70	218	COG0681@1|root,KOG3342@2759|Eukaryota,38Y2A@33154|Opisthokonta,3P0U2@4751|Fungi,3V0FF@5204|Basidiomycota,3VFM8@5234|Tremellales	4751|Fungi	U	Catalytic component of the signal peptidase complex (SPC), which catalyzes the cleavage of N-terminal signal sequences of proteins targeted to the endoplasmic reticulum. Signal peptide cleavage occurs during the translocation (cotranslationally or post-translationally) through the translocon pore into the endoplasmic reticulum	SEC11	GO:0003674,GO:0003824,GO:0005575,GO:0005622,GO:0005623,GO:0005737,GO:0005783,GO:0005787,GO:0005789,GO:0006465,GO:0006508,GO:0006518,GO:0006605,GO:0006807,GO:0006810,GO:0006886,GO:0008104,GO:0008150,GO:0008152,GO:0008233,GO:0009987,GO:0010467,GO:0012505,GO:0015031,GO:0015833,GO:0016020,GO:0016485,GO:0016787,GO:0019538,GO:0031984,GO:0032991,GO:0033036,GO:0033365,GO:0034613,GO:0034641,GO:0042175,GO:…	3.4.21.89	ko:K13280	ko03060,map03060	-	-	-	ko00000,ko00001,ko01000,ko01002	-	-	-	Peptidase_S24	IPR001733	Peptidase S26B	1	1	1	1	1	1	1	1	1	1	0	1	2	1	1	1	2	1	1	0	1	1	1	1	1	1	1
OG0002418	327079.R9P0B8	1.94e-128	376	COG0638@1|root,KOG0863@2759|Eukaryota,38BYM@33154|Opisthokonta,3NW5C@4751|Fungi,3UYYE@5204|Basidiomycota,3N3WR@452284|Ustilaginomycotina	4751|Fungi	O	Proteasome subunit A N-terminal signature Add an annotation	PRE5	GO:0000502,GO:0005575,GO:0005622,GO:0005623,GO:0005634,GO:0005737,GO:0005829,GO:0005839,GO:0006508,GO:0006511,GO:0006807,GO:0007088,GO:0007346,GO:0008150,GO:0008152,GO:0009056,GO:0009057,GO:0009896,GO:0009987,GO:0010498,GO:0010499,GO:0010564,GO:0010638,GO:0010965,GO:0012505,GO:0016020,GO:0019538,GO:0019773,GO:0019941,GO:0030071,GO:0030163,GO:0031331,GO:0031597,GO:0032270,GO:0032436,GO:0032991,GO:…	3.4.25.1	ko:K02725	ko03050,map03050	M00337,M00340	-	-	ko00000,ko00001,ko00002,ko01000,ko01002,ko03051,ko04147	-	-	-	Proteasome,Proteasome_A_N	IPR050115	Proteasome subunit alpha	1	1	1	1	1	1	1	1	1	1	1	1	1	1	1	1	1	1	1	1	1	1	1	1	1	1	1
OG0002418	327079.R9P0B8	1.94e-128	376	COG0638@1|root,KOG0863@2759|Eukaryota,38BYM@33154|Opisthokonta,3NW5C@4751|Fungi,3UYYE@5204|Basidiomycota,3N3WR@452284|Ustilaginomycotina	4751|Fungi	O	Proteasome subunit A N-terminal signature Add an annotation	PRE5	GO:0000502,GO:0005575,GO:0005622,GO:0005623,GO:0005634,GO:0005737,GO:0005829,GO:0005839,GO:0006508,GO:0006511,GO:0006807,GO:0007088,GO:0007346,GO:0008150,GO:0008152,GO:0009056,GO:0009057,GO:0009896,GO:0009987,GO:0010498,GO:0010499,GO:0010564,GO:0010638,GO:0010965,GO:0012505,GO:0016020,GO:0019538,GO:0019773,GO:0019941,GO:0030071,GO:0030163,GO:0031331,GO:0031597,GO:0032270,GO:0032436,GO:0032991,GO:…	3.4.25.1	ko:K02725	ko03050,map03050	M00337,M00340	-	-	ko00000,ko00001,ko00002,ko01000,ko01002,ko03051,ko04147	-	-	-	Proteasome,Proteasome_A_N	IPR029055	Nucleophile aminohydrolases, N-terminal	1	1	1	1	1	1	1	1	1	1	1	1	1	1	1	1	1	1	1	1	1	1	1	1	1	1	1
OG0002489	83344.XP_007923374.1	4.88e-174	510	COG0006@1|root,KOG2737@2759|Eukaryota,39SGG@33154|Opisthokonta,3NY5A@4751|Fungi,3QSAE@4890|Ascomycota,1ZYGV@147541|Dothideomycetes,3MF27@451867|Dothideomycetidae	4751|Fungi	E	Aminopeptidase P, N-terminal domain	PEPP	-	3.4.13.9	ko:K14213	-	-	-	-	ko00000,ko01000,ko01002	-	-	-	AMP_N,Peptidase_M24	IPR029149	Creatinase/Aminopeptidase P/Spt16, N-terminal	1	1	0	1	1	1	1	1	1	1	2	1	3	0	0	0	0	0	0	0	0	0	1	1	1	1	1
OG0002489	83344.XP_007923374.1	4.88e-174	510	COG0006@1|root,KOG2737@2759|Eukaryota,39SGG@33154|Opisthokonta,3NY5A@4751|Fungi,3QSAE@4890|Ascomycota,1ZYGV@147541|Dothideomycetes,3MF27@451867|Dothideomycetidae	4751|Fungi	E	Aminopeptidase P, N-terminal domain	PEPP	-	3.4.13.9	ko:K14213	-	-	-	-	ko00000,ko01000,ko01002	-	-	-	AMP_N,Peptidase_M24	IPR052433	Xaa-Pro dipeptidase-like	1	1	0	1	1	1	1	1	1	1	2	1	3	0	0	0	0	0	0	0	0	0	1	1	1	1	1
OG0002489	83344.XP_007923374.1	4.88e-174	510	COG0006@1|root,KOG2737@2759|Eukaryota,39SGG@33154|Opisthokonta,3NY5A@4751|Fungi,3QSAE@4890|Ascomycota,1ZYGV@147541|Dothideomycetes,3MF27@451867|Dothideomycetidae	4751|Fungi	E	Aminopeptidase P, N-terminal domain	PEPP	-	3.4.13.9	ko:K14213	-	-	-	-	ko00000,ko01000,ko01002	-	-	-	AMP_N,Peptidase_M24	IPR036005	Creatinase/aminopeptidase-like	1	1	0	1	1	1	1	1	1	1	2	1	3	0	0	0	0	0	0	0	0	0	1	1	1	1	1
OG0002489	83344.XP_007923374.1	4.88e-174	510	COG0006@1|root,KOG2737@2759|Eukaryota,39SGG@33154|Opisthokonta,3NY5A@4751|Fungi,3QSAE@4890|Ascomycota,1ZYGV@147541|Dothideomycetes,3MF27@451867|Dothideomycetidae	4751|Fungi	E	Aminopeptidase P, N-terminal domain	PEPP	-	3.4.13.9	ko:K14213	-	-	-	-	ko00000,ko01000,ko01002	-	-	-	AMP_N,Peptidase_M24	IPR036005	Creatinase/aminopeptidase-like	1	1	0	1	1	1	1	1	1	1	2	1	3	0	0	0	0	0	0	0	0	0	1	1	1	1	1
OG0002815	63400.XP_003012504.1	0	1469	COG0339@1|root,KOG2089@2759|Eukaryota,38SFI@33154|Opisthokonta,3NX1E@4751|Fungi,3QJCH@4890|Ascomycota,20BAI@147545|Eurotiomycetes,3AZ17@33183|Onygenales,3FTWB@34384|Arthrodermataceae	4751|Fungi	O	Peptidase family M3	PRD1	GO:0000322,GO:0000323,GO:0000324,GO:0003674,GO:0003824,GO:0004175,GO:0004222,GO:0005575,GO:0005622,GO:0005623,GO:0005737,GO:0005739,GO:0005740,GO:0005758,GO:0005773,GO:0005794,GO:0006508,GO:0006518,GO:0006807,GO:0008150,GO:0008152,GO:0008233,GO:0008237,GO:0009987,GO:0012505,GO:0016787,GO:0019538,GO:0031967,GO:0031970,GO:0031974,GO:0031975,GO:0034641,GO:0043170,GO:0043226,GO:0043227,GO:0043229,GO:…	3.4.24.37	ko:K01405,ko:K13726	-	-	-	-	ko00000,ko01000,ko01002	-	-	-	Peptidase_M3	IPR027417	P-loop containing nucleoside triphosphate hydrolase	4	1	1	1	1	1	1	1	1	1	2	1	2	0	0	0	0	0	0	0	0	0	1	1	1	1	1
OG0002815	63400.XP_003012504.1	0	1469	COG0339@1|root,KOG2089@2759|Eukaryota,38SFI@33154|Opisthokonta,3NX1E@4751|Fungi,3QJCH@4890|Ascomycota,20BAI@147545|Eurotiomycetes,3AZ17@33183|Onygenales,3FTWB@34384|Arthrodermataceae	4751|Fungi	O	Peptidase family M3	PRD1	GO:0000322,GO:0000323,GO:0000324,GO:0003674,GO:0003824,GO:0004175,GO:0004222,GO:0005575,GO:0005622,GO:0005623,GO:0005737,GO:0005739,GO:0005740,GO:0005758,GO:0005773,GO:0005794,GO:0006508,GO:0006518,GO:0006807,GO:0008150,GO:0008152,GO:0008233,GO:0008237,GO:0009987,GO:0012505,GO:0016787,GO:0019538,GO:0031967,GO:0031970,GO:0031974,GO:0031975,GO:0034641,GO:0043170,GO:0043226,GO:0043227,GO:0043229,GO:…	3.4.24.37	ko:K01405,ko:K13726	-	-	-	-	ko00000,ko01000,ko01002	-	-	-	Peptidase_M3	IPR045090	Peptidase M3A/M3B	4	1	1	1	1	1	1	1	1	1	2	1	2	0	0	0	0	0	0	0	0	0	1	1	1	1	1
OG0002815	63400.XP_003012504.1	0	1469	COG0339@1|root,KOG2089@2759|Eukaryota,38SFI@33154|Opisthokonta,3NX1E@4751|Fungi,3QJCH@4890|Ascomycota,20BAI@147545|Eurotiomycetes,3AZ17@33183|Onygenales,3FTWB@34384|Arthrodermataceae	4751|Fungi	O	Peptidase family M3	PRD1	GO:0000322,GO:0000323,GO:0000324,GO:0003674,GO:0003824,GO:0004175,GO:0004222,GO:0005575,GO:0005622,GO:0005623,GO:0005737,GO:0005739,GO:0005740,GO:0005758,GO:0005773,GO:0005794,GO:0006508,GO:0006518,GO:0006807,GO:0008150,GO:0008152,GO:0008233,GO:0008237,GO:0009987,GO:0012505,GO:0016787,GO:0019538,GO:0031967,GO:0031970,GO:0031974,GO:0031975,GO:0034641,GO:0043170,GO:0043226,GO:0043227,GO:0043229,GO:…	3.4.24.37	ko:K01405,ko:K13726	-	-	-	-	ko00000,ko01000,ko01002	-	-	-	Peptidase_M3	IPR036770	Ankyrin repeat-containing domain superfamily	4	1	1	1	1	1	1	1	1	1	2	1	2	0	0	0	0	0	0	0	0	0	1	1	1	1	1
OG0002888	5551.XP_003233502.1	0	1044	KOG1865@1|root,KOG1865@2759|Eukaryota,3A7W0@33154|Opisthokonta,3P65S@4751|Fungi,3QY1Q@4890|Ascomycota,20IYD@147545|Eurotiomycetes,3B568@33183|Onygenales,3FXY0@34384|Arthrodermataceae	4751|Fungi	O	Belongs to the peptidase C19 family	-	-	3.4.19.12	ko:K11855	-	-	-	-	ko00000,ko01000,ko01002,ko04121	-	-	-	UCH	IPR050164	Ubiquitin carboxyl-terminal hydrolases	1	0	0	0	0	0	0	2	2	2	0	0	0	0	0	0	0	0	0	0	0	0	2	2	1	1	1
OG0002888	5551.XP_003233502.1	0	1044	KOG1865@1|root,KOG1865@2759|Eukaryota,3A7W0@33154|Opisthokonta,3P65S@4751|Fungi,3QY1Q@4890|Ascomycota,20IYD@147545|Eurotiomycetes,3B568@33183|Onygenales,3FXY0@34384|Arthrodermataceae	4751|Fungi	O	Belongs to the peptidase C19 family	-	-	3.4.19.12	ko:K11855	-	-	-	-	ko00000,ko01000,ko01002,ko04121	-	-	-	UCH	IPR038765	Papain-like cysteine peptidase superfamily	1	0	0	0	0	0	0	2	2	2	0	0	0	0	0	0	0	0	0	0	0	0	2	2	1	1	1
OG0002902	4909.A0A099P060	0	1947	COG0258@1|root,COG5207@1|root,KOG0944@2759|Eukaryota,KOG2520@2759|Eukaryota,38CE9@33154|Opisthokonta,3NX3U@4751|Fungi,3QK3T@4890|Ascomycota,3RR60@4891|Saccharomycetes	4751|Fungi	O	Ubiquitinyl hydrolase 1	ubp14	GO:0003674,GO:0003824,GO:0004843,GO:0005575,GO:0005622,GO:0005623,GO:0005737,GO:0006109,GO:0006111,GO:0006508,GO:0006511,GO:0006807,GO:0008150,GO:0008152,GO:0008233,GO:0008234,GO:0009056,GO:0009057,GO:0009889,GO:0009890,GO:0009892,GO:0009987,GO:0010498,GO:0010675,GO:0010677,GO:0010906,GO:0016787,GO:0019222,GO:0019538,GO:0019783,GO:0019941,GO:0030163,GO:0031323,GO:0031324,GO:0031326,GO:0031327,GO:…	3.4.19.12	ko:K11836	-	-	-	-	ko00000,ko01000,ko01002,ko04147	-	-	-	UBA,UCH,UCH_1,zf-UBP	IPR006084	XPG/Rad2 endonuclease	0	1	1	1	1	1	1	1	1	1	1	2	2	1	1	2	2	1	1	1	0	0	1	1	1	1	1
OG0002902	4909.A0A099P060	0	1947	COG0258@1|root,COG5207@1|root,KOG0944@2759|Eukaryota,KOG2520@2759|Eukaryota,38CE9@33154|Opisthokonta,3NX3U@4751|Fungi,3QK3T@4890|Ascomycota,3RR60@4891|Saccharomycetes	4751|Fungi	O	Ubiquitinyl hydrolase 1	ubp14	GO:0003674,GO:0003824,GO:0004843,GO:0005575,GO:0005622,GO:0005623,GO:0005737,GO:0006109,GO:0006111,GO:0006508,GO:0006511,GO:0006807,GO:0008150,GO:0008152,GO:0008233,GO:0008234,GO:0009056,GO:0009057,GO:0009889,GO:0009890,GO:0009892,GO:0009987,GO:0010498,GO:0010675,GO:0010677,GO:0010906,GO:0016787,GO:0019222,GO:0019538,GO:0019783,GO:0019941,GO:0030163,GO:0031323,GO:0031324,GO:0031326,GO:0031327,GO:…	3.4.19.12	ko:K11836	-	-	-	-	ko00000,ko01000,ko01002,ko04147	-	-	-	UBA,UCH,UCH_1,zf-UBP	IPR029060	PIN-like domain superfamily	0	1	1	1	1	1	1	1	1	1	1	2	2	1	1	2	2	1	1	1	0	0	1	1	1	1	1
OG0002975	5551.XP_003237755.1	0	950	KOG3991@1|root,KOG3991@2759|Eukaryota,38D99@33154|Opisthokonta,3NZ2J@4751|Fungi,3QMGR@4890|Ascomycota,20F26@147545|Eurotiomycetes,3B2GB@33183|Onygenales,3FVA8@34384|Arthrodermataceae	4751|Fungi	O	Peptidase C65 Otubain	-	-	3.4.19.12	ko:K09602	-	-	-	-	ko00000,ko01000,ko01002,ko04121	-	-	-	Peptidase_C65	IPR038765	Papain-like cysteine peptidase superfamily	1	0	0	0	0	0	0	1	1	1	3	1	4	1	1	2	3	0	0	0	0	0	1	1	1	1	1
OG0003081	5551.XP_003235559.1	0	1532	KOG3675@1|root,KOG3675@2759|Eukaryota,38E6G@33154|Opisthokonta,3NWHP@4751|Fungi,3QMR7@4890|Ascomycota,20E8C@147545|Eurotiomycetes,3B15H@33183|Onygenales,3FWXF@34384|Arthrodermataceae	4751|Fungi	O	Belongs to the peptidase M49 family	YOL057W	GO:0003674,GO:0003824,GO:0004177,GO:0005575,GO:0005622,GO:0005623,GO:0005634,GO:0005737,GO:0006508,GO:0006807,GO:0008150,GO:0008152,GO:0008233,GO:0008238,GO:0008239,GO:0016787,GO:0019538,GO:0043170,GO:0043226,GO:0043227,GO:0043229,GO:0043231,GO:0044238,GO:0044424,GO:0044464,GO:0070011,GO:0071704,GO:0140096,GO:1901564	3.4.14.4	ko:K01277	-	-	-	-	ko00000,ko01000,ko01002	-	-	-	Peptidase_M49	IPR039461	Peptidase family M49	0	1	0	1	1	1	0	1	1	1	2	1	2	0	0	0	0	0	0	0	0	0	1	1	1	1	1
OG0003126	84751.XP_007880520.1	4.22e-49	194	COG1310@1|root,KOG2880@2759|Eukaryota,38CKJ@33154|Opisthokonta,3NXWM@4751|Fungi,3V0VA@5204|Basidiomycota	4751|Fungi	T	Mov34-domain-containing protein	-	GO:0003674,GO:0003824,GO:0005488,GO:0005515,GO:0006464,GO:0006508,GO:0006511,GO:0006807,GO:0006810,GO:0006886,GO:0007034,GO:0008104,GO:0008150,GO:0008152,GO:0008233,GO:0008234,GO:0008270,GO:0009056,GO:0009057,GO:0009987,GO:0015031,GO:0015833,GO:0016192,GO:0016197,GO:0016579,GO:0016787,GO:0019538,GO:0019783,GO:0019941,GO:0030163,GO:0031593,GO:0032509,GO:0032511,GO:0033036,GO:0033365,GO:0034613,GO:…	3.4.19.12	ko:K11866	ko04144,map04144	-	-	-	ko00000,ko00001,ko01000,ko01002,ko04121,ko04131	-	-	-	JAB,USP8_dimer			1	0	0	0	0	0	0	1	1	1	2	1	2	1	1	2	1	1	1	1	0	0	1	1	1	1	1
OG0003307	82508.K1WG46	8.59e-113	340	COG0024@1|root,KOG2738@2759|Eukaryota,38BS3@33154|Opisthokonta,3P0AG@4751|Fungi,3V47J@5204|Basidiomycota,3VERD@5234|Tremellales	4751|Fungi	O	Removes the N-terminal methionine from nascent proteins. The N-terminal methionine is often cleaved when the second residue in the primary sequence is small and uncharged (Met-Ala-, Cys, Gly, Pro, Ser, Thr, or Val)	-	-	3.4.11.18	ko:K01265	-	-	-	-	ko00000,ko01000,ko01002	-	-	-	Peptidase_M24	IPR036005	Creatinase/aminopeptidase-like	1	0	0	0	0	0	1	1	1	1	1	1	1	1	1	2	1	0	0	0	0	0	1	1	1	1	1
OG0003307	82508.K1WG46	8.59e-113	340	COG0024@1|root,KOG2738@2759|Eukaryota,38BS3@33154|Opisthokonta,3P0AG@4751|Fungi,3V47J@5204|Basidiomycota,3VERD@5234|Tremellales	4751|Fungi	O	Removes the N-terminal methionine from nascent proteins. The N-terminal methionine is often cleaved when the second residue in the primary sequence is small and uncharged (Met-Ala-, Cys, Gly, Pro, Ser, Thr, or Val)	-	-	3.4.11.18	ko:K01265	-	-	-	-	ko00000,ko01000,ko01002	-	-	-	Peptidase_M24	IPR029052	Metallo-dependent phosphatase-like	1	0	0	0	0	0	1	1	1	1	1	1	1	1	1	2	1	0	0	0	0	0	1	1	1	1	1
OG0003307	82508.K1WG46	8.59e-113	340	COG0024@1|root,KOG2738@2759|Eukaryota,38BS3@33154|Opisthokonta,3P0AG@4751|Fungi,3V47J@5204|Basidiomycota,3VERD@5234|Tremellales	4751|Fungi	O	Removes the N-terminal methionine from nascent proteins. The N-terminal methionine is often cleaved when the second residue in the primary sequence is small and uncharged (Met-Ala-, Cys, Gly, Pro, Ser, Thr, or Val)	-	-	3.4.11.18	ko:K01265	-	-	-	-	ko00000,ko01000,ko01002	-	-	-	Peptidase_M24	IPR000979	Phosphodiesterase MJ0936/Vps29	1	0	0	0	0	0	1	1	1	1	1	1	1	1	1	2	1	0	0	0	0	0	1	1	1	1	1
OG0003369	109871.XP_006681033.1	2.95e-24	112	KOG3059@1|root,KOG3059@2759|Eukaryota,39SXG@33154|Opisthokonta,3NZ4F@4751|Fungi	4751|Fungi	I	phosphatidylinositol	GPI2	GO:0000506,GO:0003674,GO:0003824,GO:0005575,GO:0005622,GO:0005623,GO:0005737,GO:0005783,GO:0005789,GO:0006464,GO:0006497,GO:0006505,GO:0006506,GO:0006629,GO:0006643,GO:0006644,GO:0006650,GO:0006661,GO:0006664,GO:0006793,GO:0006796,GO:0006807,GO:0008150,GO:0008152,GO:0008194,GO:0008375,GO:0008610,GO:0008654,GO:0009058,GO:0009059,GO:0009247,GO:0009987,GO:0012505,GO:0016020,GO:0016021,GO:0016740,GO:…	3.4.11.19	ko:K01266,ko:K03859	ko00563,ko01100,map00563,map01100	-	R05916	-	ko00000,ko00001,ko01000,ko01002	-	-	-	GPI2	IPR029058	Alpha/Beta hydrolase fold	3	0	1	0	1	1	0	1	1	1	0	0	1	0	1	2	1	0	0	0	1	0	1	1	1	1	1
OG0003369	109871.XP_006681033.1	2.95e-24	112	KOG3059@1|root,KOG3059@2759|Eukaryota,39SXG@33154|Opisthokonta,3NZ4F@4751|Fungi	4751|Fungi	I	phosphatidylinositol	GPI2	GO:0000506,GO:0003674,GO:0003824,GO:0005575,GO:0005622,GO:0005623,GO:0005737,GO:0005783,GO:0005789,GO:0006464,GO:0006497,GO:0006505,GO:0006506,GO:0006629,GO:0006643,GO:0006644,GO:0006650,GO:0006661,GO:0006664,GO:0006793,GO:0006796,GO:0006807,GO:0008150,GO:0008152,GO:0008194,GO:0008375,GO:0008610,GO:0008654,GO:0009058,GO:0009059,GO:0009247,GO:0009987,GO:0012505,GO:0016020,GO:0016021,GO:0016740,GO:…	3.4.11.19	ko:K01266,ko:K03859	ko00563,ko01100,map00563,map01100	-	R05916	-	ko00000,ko00001,ko01000,ko01002	-	-	-	GPI2	IPR009450	Phosphatidylinositol N-acetylglucosaminyltransferase subunit C	3	0	1	0	1	1	0	1	1	1	0	0	1	0	1	2	1	0	0	0	1	0	1	1	1	1	1
OG0003475	5551.XP_003231292.1	2.41e-228	642	KOG2778@1|root,KOG2778@2759|Eukaryota,38G16@33154|Opisthokonta,3NVRT@4751|Fungi,3QQ22@4890|Ascomycota,20FNZ@147545|Eurotiomycetes,3B1Z5@33183|Onygenales,3FTK3@34384|Arthrodermataceae	4751|Fungi	O	Ubiquitin carboxyl-terminal hydrolase	-	GO:0000338,GO:0003674,GO:0003824,GO:0004843,GO:0005575,GO:0005622,GO:0005623,GO:0005737,GO:0006464,GO:0006508,GO:0006511,GO:0006515,GO:0006807,GO:0006950,GO:0008150,GO:0008152,GO:0008233,GO:0008234,GO:0009056,GO:0009057,GO:0009987,GO:0010033,GO:0010498,GO:0016787,GO:0019538,GO:0019783,GO:0019784,GO:0019941,GO:0030163,GO:0033554,GO:0035966,GO:0035967,GO:0036211,GO:0036459,GO:0042221,GO:0043161,GO:…	3.4.19.12	ko:K05610	-	-	-	-	ko00000,ko01000,ko01002,ko04121	-	-	-	Peptidase_C12	IPR038765	Papain-like cysteine peptidase superfamily	1	1	1	1	1	1	1	1	1	1	1	1	2	0	0	0	0	0	0	0	0	0	1	1	1	1	1
OG0003475	5551.XP_003231292.1	2.41e-228	642	KOG2778@1|root,KOG2778@2759|Eukaryota,38G16@33154|Opisthokonta,3NVRT@4751|Fungi,3QQ22@4890|Ascomycota,20FNZ@147545|Eurotiomycetes,3B1Z5@33183|Onygenales,3FTK3@34384|Arthrodermataceae	4751|Fungi	O	Ubiquitin carboxyl-terminal hydrolase	-	GO:0000338,GO:0003674,GO:0003824,GO:0004843,GO:0005575,GO:0005622,GO:0005623,GO:0005737,GO:0006464,GO:0006508,GO:0006511,GO:0006515,GO:0006807,GO:0006950,GO:0008150,GO:0008152,GO:0008233,GO:0008234,GO:0009056,GO:0009057,GO:0009987,GO:0010033,GO:0010498,GO:0016787,GO:0019538,GO:0019783,GO:0019784,GO:0019941,GO:0030163,GO:0033554,GO:0035966,GO:0035967,GO:0036211,GO:0036459,GO:0042221,GO:0043161,GO:…	3.4.19.12	ko:K05610	-	-	-	-	ko00000,ko01000,ko01002,ko04121	-	-	-	Peptidase_C12	IPR001578	Peptidase C12, ubiquitin carboxyl-terminal hydrolase	1	1	1	1	1	1	1	1	1	1	1	1	2	0	0	0	0	0	0	0	0	0	1	1	1	1	1
OG0003493	42374.XP_002418670.1	0	938	COG0596@1|root,2QSNW@2759|Eukaryota,38H5Q@33154|Opisthokonta,3NU0A@4751|Fungi,3QP53@4890|Ascomycota,3RU9B@4891|Saccharomycetes,47ANT@766764|Debaryomycetaceae	4751|Fungi	S	alpha/beta hydrolase fold	-	-	3.4.11.5	ko:K01259	ko00330,map00330	-	R00135	-	ko00000,ko00001,ko01000,ko01002	-	-	-	Abhydrolase_1	IPR051601	Serine protease/Carboxylesterase S33	0	1	1	1	1	1	0	1	1	1	2	1	2	0	0	0	0	0	0	0	0	0	2	1	1	1	2
OG0003493	42374.XP_002418670.1	0	938	COG0596@1|root,2QSNW@2759|Eukaryota,38H5Q@33154|Opisthokonta,3NU0A@4751|Fungi,3QP53@4890|Ascomycota,3RU9B@4891|Saccharomycetes,47ANT@766764|Debaryomycetaceae	4751|Fungi	S	alpha/beta hydrolase fold	-	-	3.4.11.5	ko:K01259	ko00330,map00330	-	R00135	-	ko00000,ko00001,ko01000,ko01002	-	-	-	Abhydrolase_1	IPR029058	Alpha/Beta hydrolase fold	0	1	1	1	1	1	0	1	1	1	2	1	2	0	0	0	0	0	0	0	0	0	2	1	1	1	2
OG0003569	82508.K1VCT3	3.7e-148	431	COG0596@1|root,2QPPY@2759|Eukaryota,38J2J@33154|Opisthokonta,3NZP5@4751|Fungi,3UZEN@5204|Basidiomycota,3VHBM@5234|Tremellales	4751|Fungi	I	Alpha/beta hydrolase family	-	-	3.4.11.5	ko:K01259	ko00330,map00330	-	R00135	-	ko00000,ko00001,ko01000,ko01002	-	-	-	Abhydrolase_1,Abhydrolase_4	IPR029058	Alpha/Beta hydrolase fold	1	0	0	0	0	0	0	1	1	1	0	0	0	0	0	0	0	1	1	1	1	1	1	1	1	1	1
OG0003569	82508.K1VCT3	3.7e-148	431	COG0596@1|root,2QPPY@2759|Eukaryota,38J2J@33154|Opisthokonta,3NZP5@4751|Fungi,3UZEN@5204|Basidiomycota,3VHBM@5234|Tremellales	4751|Fungi	I	Alpha/beta hydrolase family	-	-	3.4.11.5	ko:K01259	ko00330,map00330	-	R00135	-	ko00000,ko00001,ko01000,ko01002	-	-	-	Abhydrolase_1,Abhydrolase_4	IPR005944	Proline iminopeptidase	1	0	0	0	0	0	0	1	1	1	0	0	0	0	0	0	0	1	1	1	1	1	1	1	1	1	1
OG0003585	5480.G8B8J6	0	1613	28K46@1|root,2QSIQ@2759|Eukaryota,39XHJ@33154|Opisthokonta,3NWQ4@4751|Fungi,3QK0N@4890|Ascomycota,3RSED@4891|Saccharomycetes,47B4D@766764|Debaryomycetaceae	4751|Fungi	U	Belongs to the peptidase C19 family	-	GO:0003674,GO:0003824,GO:0004843,GO:0005575,GO:0005622,GO:0005623,GO:0005737,GO:0005739,GO:0005740,GO:0005741,GO:0006464,GO:0006508,GO:0006807,GO:0008150,GO:0008152,GO:0008233,GO:0008234,GO:0009987,GO:0016020,GO:0016579,GO:0016787,GO:0019538,GO:0019783,GO:0019867,GO:0031090,GO:0031966,GO:0031967,GO:0031968,GO:0031975,GO:0036211,GO:0036459,GO:0043170,GO:0043226,GO:0043227,GO:0043229,GO:0043231,GO:…	3.4.19.12	ko:K11874	-	-	-	-	ko00000,ko01000,ko01002,ko04121	-	-	-	UCH	IPR050164	Ubiquitin carboxyl-terminal hydrolases	0	1	1	1	1	1	1	1	1	1	1	1	2	0	0	0	0	0	0	0	0	1	1	1	1	1	1
OG0003585	5480.G8B8J6	0	1613	28K46@1|root,2QSIQ@2759|Eukaryota,39XHJ@33154|Opisthokonta,3NWQ4@4751|Fungi,3QK0N@4890|Ascomycota,3RSED@4891|Saccharomycetes,47B4D@766764|Debaryomycetaceae	4751|Fungi	U	Belongs to the peptidase C19 family	-	GO:0003674,GO:0003824,GO:0004843,GO:0005575,GO:0005622,GO:0005623,GO:0005737,GO:0005739,GO:0005740,GO:0005741,GO:0006464,GO:0006508,GO:0006807,GO:0008150,GO:0008152,GO:0008233,GO:0008234,GO:0009987,GO:0016020,GO:0016579,GO:0016787,GO:0019538,GO:0019783,GO:0019867,GO:0031090,GO:0031966,GO:0031967,GO:0031968,GO:0031975,GO:0036211,GO:0036459,GO:0043170,GO:0043226,GO:0043227,GO:0043229,GO:0043231,GO:…	3.4.19.12	ko:K11874	-	-	-	-	ko00000,ko01000,ko01002,ko04121	-	-	-	UCH	IPR038765	Papain-like cysteine peptidase superfamily	0	1	1	1	1	1	1	1	1	1	1	1	2	0	0	0	0	0	0	0	0	1	1	1	1	1	1
OG0003679	5551.XP_003235838.1	0	1040	COG0705@1|root,KOG2980@2759|Eukaryota,38CY3@33154|Opisthokonta,3P17Y@4751|Fungi,3QRZN@4890|Ascomycota,20EGM@147545|Eurotiomycetes,3AZ9Z@33183|Onygenales,3FUET@34384|Arthrodermataceae	4751|Fungi	U	Rhomboid family	-	GO:0003674,GO:0003824,GO:0004175,GO:0004252,GO:0005575,GO:0005622,GO:0005623,GO:0005737,GO:0005739,GO:0005740,GO:0005743,GO:0006465,GO:0006508,GO:0006518,GO:0006807,GO:0006996,GO:0007005,GO:0008150,GO:0008152,GO:0008233,GO:0008236,GO:0009987,GO:0010467,GO:0010821,GO:0016020,GO:0016021,GO:0016043,GO:0016485,GO:0016787,GO:0017171,GO:0019538,GO:0019866,GO:0031090,GO:0031224,GO:0031966,GO:0031967,GO:…	3.4.21.105	ko:K09650	-	-	-	-	ko00000,ko01000,ko01002,ko03029	-	-	-	Rhomboid	IPR050925	Rhomboid protease S54	0	1	1	1	0	1	1	1	1	1	1	1	1	0	0	0	0	0	0	0	0	0	1	1	1	1	1
OG0003679	5551.XP_003235838.1	0	1040	COG0705@1|root,KOG2980@2759|Eukaryota,38CY3@33154|Opisthokonta,3P17Y@4751|Fungi,3QRZN@4890|Ascomycota,20EGM@147545|Eurotiomycetes,3AZ9Z@33183|Onygenales,3FUET@34384|Arthrodermataceae	4751|Fungi	U	Rhomboid family	-	GO:0003674,GO:0003824,GO:0004175,GO:0004252,GO:0005575,GO:0005622,GO:0005623,GO:0005737,GO:0005739,GO:0005740,GO:0005743,GO:0006465,GO:0006508,GO:0006518,GO:0006807,GO:0006996,GO:0007005,GO:0008150,GO:0008152,GO:0008233,GO:0008236,GO:0009987,GO:0010467,GO:0010821,GO:0016020,GO:0016021,GO:0016043,GO:0016485,GO:0016787,GO:0017171,GO:0019538,GO:0019866,GO:0031090,GO:0031224,GO:0031966,GO:0031967,GO:…	3.4.21.105	ko:K09650	-	-	-	-	ko00000,ko01000,ko01002,ko03029	-	-	-	Rhomboid	IPR035952	Rhomboid-like superfamily	0	1	1	1	0	1	1	1	1	1	1	1	1	0	0	0	0	0	0	0	0	0	1	1	1	1	1
OG0003715	63402.XP_003175727.1	0	863	KOG2605@1|root,KOG2605@2759|Eukaryota,39JFE@33154|Opisthokonta,3P1DA@4751|Fungi,3QSVV@4890|Ascomycota,20G1X@147545|Eurotiomycetes,3B3HW@33183|Onygenales,3FX3P@34384|Arthrodermataceae	4751|Fungi	OT	OTU-like cysteine protease	-	-	3.4.19.12	ko:K12655,ko:K13717	ko04622,map04622	-	-	-	ko00000,ko00001,ko01000,ko01002,ko04121	-	-	-	OTU	IPR038765	Papain-like cysteine peptidase superfamily	0	0	0	0	0	0	0	1	1	1	2	1	2	0	0	1	1	1	1	1	1	1	1	1	1	1	1
OG0003715	63402.XP_003175727.1	0	863	KOG2605@1|root,KOG2605@2759|Eukaryota,39JFE@33154|Opisthokonta,3P1DA@4751|Fungi,3QSVV@4890|Ascomycota,20G1X@147545|Eurotiomycetes,3B3HW@33183|Onygenales,3FX3P@34384|Arthrodermataceae	4751|Fungi	OT	OTU-like cysteine protease	-	-	3.4.19.12	ko:K12655,ko:K13717	ko04622,map04622	-	-	-	ko00000,ko00001,ko01000,ko01002,ko04121	-	-	-	OTU	IPR050704	Peptidase C85-like	0	0	0	0	0	0	0	1	1	1	2	1	2	0	0	1	1	1	1	1	1	1	1	1	1	1	1
OG0003729	63418.F2Q2W8	3.19e-245	690	COG2828@1|root,KOG3246@2759|Eukaryota,38EQW@33154|Opisthokonta,3NUJ2@4751|Fungi,3QPE3@4890|Ascomycota,20AM7@147545|Eurotiomycetes,3B1QR@33183|Onygenales,3FSJY@34384|Arthrodermataceae	4751|Fungi	S	Ulp1 protease family, C-terminal catalytic domain	-	GO:0000338,GO:0003674,GO:0003824,GO:0004175,GO:0005575,GO:0005622,GO:0005623,GO:0005737,GO:0006464,GO:0006508,GO:0006807,GO:0008150,GO:0008152,GO:0008233,GO:0008234,GO:0009987,GO:0016787,GO:0019538,GO:0019783,GO:0019784,GO:0036211,GO:0043170,GO:0043412,GO:0044237,GO:0044238,GO:0044260,GO:0044267,GO:0044424,GO:0044464,GO:0070011,GO:0070646,GO:0070647,GO:0071704,GO:0140096,GO:1901564	3.4.22.68	ko:K08597	-	-	-	-	ko00000,ko01000,ko01002,ko04121	-	-	-	Peptidase_C48	IPR007400	PrpF-like	1	1	1	1	1	1	0	1	1	1	2	1	2	0	0	0	0	0	0	0	0	0	1	1	1	1	1
OG0003729	63418.F2Q2W8	3.19e-245	690	COG2828@1|root,KOG3246@2759|Eukaryota,38EQW@33154|Opisthokonta,3NUJ2@4751|Fungi,3QPE3@4890|Ascomycota,20AM7@147545|Eurotiomycetes,3B1QR@33183|Onygenales,3FSJY@34384|Arthrodermataceae	4751|Fungi	S	Ulp1 protease family, C-terminal catalytic domain	-	GO:0000338,GO:0003674,GO:0003824,GO:0004175,GO:0005575,GO:0005622,GO:0005623,GO:0005737,GO:0006464,GO:0006508,GO:0006807,GO:0008150,GO:0008152,GO:0008233,GO:0008234,GO:0009987,GO:0016787,GO:0019538,GO:0019783,GO:0019784,GO:0036211,GO:0043170,GO:0043412,GO:0044237,GO:0044238,GO:0044260,GO:0044267,GO:0044424,GO:0044464,GO:0070011,GO:0070646,GO:0070647,GO:0071704,GO:0140096,GO:1901564	3.4.22.68	ko:K08597	-	-	-	-	ko00000,ko01000,ko01002,ko04121	-	-	-	Peptidase_C48	IPR038765	Papain-like cysteine peptidase superfamily	1	1	1	1	1	1	0	1	1	1	2	1	2	0	0	0	0	0	0	0	0	0	1	1	1	1	1
OG0003747	63402.XP_003173289.1	0	997	COG3579@1|root,KOG4128@2759|Eukaryota,38E6A@33154|Opisthokonta,3NVD9@4751|Fungi,3QKEW@4890|Ascomycota,20FJ6@147545|Eurotiomycetes,3B1S5@33183|Onygenales,3FTB3@34384|Arthrodermataceae	4751|Fungi	E	Papain family cysteine protease	LAP3	GO:0000096,GO:0000098,GO:0000122,GO:0000976,GO:0000977,GO:0000978,GO:0000987,GO:0001012,GO:0001067,GO:0003674,GO:0003676,GO:0003677,GO:0003690,GO:0003697,GO:0003723,GO:0003729,GO:0003824,GO:0005488,GO:0005575,GO:0005622,GO:0005623,GO:0005737,GO:0005739,GO:0006082,GO:0006355,GO:0006357,GO:0006508,GO:0006520,GO:0006790,GO:0006807,GO:0008150,GO:0008152,GO:0008233,GO:0008234,GO:0009056,GO:0009063,GO:…	3.4.22.40	ko:K01372	-	-	-	-	ko00000,ko01000,ko01002	-	-	-	Peptidase_C1_2	IPR038765	Papain-like cysteine peptidase superfamily	0	1	1	1	1	1	2	1	1	0	2	1	2	0	0	0	0	0	0	0	0	0	1	1	1	1	1
OG0003747	63402.XP_003173289.1	0	997	COG3579@1|root,KOG4128@2759|Eukaryota,38E6A@33154|Opisthokonta,3NVD9@4751|Fungi,3QKEW@4890|Ascomycota,20FJ6@147545|Eurotiomycetes,3B1S5@33183|Onygenales,3FTB3@34384|Arthrodermataceae	4751|Fungi	E	Papain family cysteine protease	LAP3	GO:0000096,GO:0000098,GO:0000122,GO:0000976,GO:0000977,GO:0000978,GO:0000987,GO:0001012,GO:0001067,GO:0003674,GO:0003676,GO:0003677,GO:0003690,GO:0003697,GO:0003723,GO:0003729,GO:0003824,GO:0005488,GO:0005575,GO:0005622,GO:0005623,GO:0005737,GO:0005739,GO:0006082,GO:0006355,GO:0006357,GO:0006508,GO:0006520,GO:0006790,GO:0006807,GO:0008150,GO:0008152,GO:0008233,GO:0008234,GO:0009056,GO:0009063,GO:…	3.4.22.40	ko:K01372	-	-	-	-	ko00000,ko01000,ko01002	-	-	-	Peptidase_C1_2	IPR004134	Peptidase C1B, bleomycin hydrolase	0	1	1	1	1	1	2	1	1	0	2	1	2	0	0	0	0	0	0	0	0	0	1	1	1	1	1
OG0003814	83344.XP_007929348.1	0	1025	COG4934@1|root,2QTN1@2759|Eukaryota,38V3Y@33154|Opisthokonta,3NX98@4751|Fungi,3QP46@4890|Ascomycota,2073A@147541|Dothideomycetes,3MND4@451867|Dothideomycetidae	4751|Fungi	E	Pro-kumamolisin, activation domain	-	-	3.4.14.9	ko:K01279	ko04142,map04142	-	-	-	ko00000,ko00001,ko01000,ko01002,ko03110,ko04147	-	-	-	Pro-kuma_activ	IPR050819	Tripeptidyl-peptidase I and related peptidases	1	0	0	0	0	0	0	1	1	1	2	1	2	0	0	0	0	0	0	0	0	0	1	1	1	1	1
OG0003814	83344.XP_007929348.1	0	1025	COG4934@1|root,2QTN1@2759|Eukaryota,38V3Y@33154|Opisthokonta,3NX98@4751|Fungi,3QP46@4890|Ascomycota,2073A@147541|Dothideomycetes,3MND4@451867|Dothideomycetidae	4751|Fungi	E	Pro-kumamolisin, activation domain	-	-	3.4.14.9	ko:K01279	ko04142,map04142	-	-	-	ko00000,ko00001,ko01000,ko01002,ko03110,ko04147	-	-	-	Pro-kuma_activ	IPR036852	Peptidase S8/S53 domain superfamily	1	0	0	0	0	0	0	1	1	1	2	1	2	0	0	0	0	0	0	0	0	0	1	1	1	1	1
OG0004026	63405.XP_002846715.1	0	4907	COG5077@1|root,KOG1866@2759|Eukaryota,38D00@33154|Opisthokonta,3NUAQ@4751|Fungi,3QQ7J@4890|Ascomycota,20CT9@147545|Eurotiomycetes,3B01V@33183|Onygenales,3FU5M@34384|Arthrodermataceae	4751|Fungi	O	Belongs to the peptidase C19 family	-	-	3.4.19.12	ko:K11853	-	-	-	-	ko00000,ko01000,ko01002,ko04121	-	-	-	DUF3517,UCH	IPR051143	TrkH Potassium Transport	0	0	0	0	0	0	0	1	1	1	3	1	2	0	0	0	0	0	0	0	0	0	1	1	1	1	2
OG0004026	63405.XP_002846715.1	0	4907	COG5077@1|root,KOG1866@2759|Eukaryota,38D00@33154|Opisthokonta,3NUAQ@4751|Fungi,3QQ7J@4890|Ascomycota,20CT9@147545|Eurotiomycetes,3B01V@33183|Onygenales,3FU5M@34384|Arthrodermataceae	4751|Fungi	O	Belongs to the peptidase C19 family	-	-	3.4.19.12	ko:K11853	-	-	-	-	ko00000,ko01000,ko01002,ko04121	-	-	-	DUF3517,UCH	IPR038765	Papain-like cysteine peptidase superfamily	0	0	0	0	0	0	0	1	1	1	3	1	2	0	0	0	0	0	0	0	0	0	1	1	1	1	2
OG0004156	430998.XP_007672752.1	3.88e-149	446	KOG2778@1|root,KOG2778@2759|Eukaryota,38G0E@33154|Opisthokonta,3NZ75@4751|Fungi,3QKKP@4890|Ascomycota,20110@147541|Dothideomycetes,3MFJ1@451867|Dothideomycetidae	4751|Fungi	O	Ubiquitin carboxyl-terminal hydrolase	-	-	3.4.19.12	ko:K05610	-	-	-	-	ko00000,ko01000,ko01002,ko04121	-	-	-	Peptidase_C12	IPR038765	Papain-like cysteine peptidase superfamily	0	0	0	0	0	0	0	1	1	1	2	1	2	0	0	0	0	0	0	0	0	0	1	1	1	1	1
OG0004156	430998.XP_007672752.1	3.88e-149	446	KOG2778@1|root,KOG2778@2759|Eukaryota,38G0E@33154|Opisthokonta,3NZ75@4751|Fungi,3QKKP@4890|Ascomycota,20110@147541|Dothideomycetes,3MFJ1@451867|Dothideomycetidae	4751|Fungi	O	Ubiquitin carboxyl-terminal hydrolase	-	-	3.4.19.12	ko:K05610	-	-	-	-	ko00000,ko01000,ko01002,ko04121	-	-	-	Peptidase_C12	IPR001578	Peptidase C12, ubiquitin carboxyl-terminal hydrolase	0	0	0	0	0	0	0	1	1	1	2	1	2	0	0	0	0	0	0	0	0	0	1	1	1	1	1
OG0004156	430998.XP_007672752.1	3.88e-149	446	KOG2778@1|root,KOG2778@2759|Eukaryota,38G0E@33154|Opisthokonta,3NZ75@4751|Fungi,3QKKP@4890|Ascomycota,20110@147541|Dothideomycetes,3MFJ1@451867|Dothideomycetidae	4751|Fungi	O	Ubiquitin carboxyl-terminal hydrolase	-	-	3.4.19.12	ko:K05610	-	-	-	-	ko00000,ko01000,ko01002,ko04121	-	-	-	Peptidase_C12	IPR038765	Papain-like cysteine peptidase superfamily	0	0	0	0	0	0	0	1	1	1	2	1	2	0	0	0	0	0	0	0	0	0	1	1	1	1	1
OG0004588	63400.XP_003017015.1	2.59e-295	806	COG1446@1|root,KOG1592@2759|Eukaryota,38JIS@33154|Opisthokonta,3NYX7@4751|Fungi,3QM61@4890|Ascomycota,20BJ9@147545|Eurotiomycetes,3B1GQ@33183|Onygenales,3FTYY@34384|Arthrodermataceae	4751|Fungi	E	Asparaginase	-	-	3.4.19.5,3.5.1.1	ko:K01424,ko:K13051	ko00250,ko00460,ko01100,ko01110,map00250,map00460,map01100,map01110	-	R00485	RC00010,RC02798	ko00000,ko00001,ko01000,ko01002	-	-	-	Asparaginase_2	IPR029055	Nucleophile aminohydrolases, N-terminal	1	0	0	0	0	0	0	1	1	1	1	1	2	0	0	0	0	0	0	0	0	0	1	1	1	1	1
OG0004588	63400.XP_003017015.1	2.59e-295	806	COG1446@1|root,KOG1592@2759|Eukaryota,38JIS@33154|Opisthokonta,3NYX7@4751|Fungi,3QM61@4890|Ascomycota,20BJ9@147545|Eurotiomycetes,3B1GQ@33183|Onygenales,3FTYY@34384|Arthrodermataceae	4751|Fungi	E	Asparaginase	-	-	3.4.19.5,3.5.1.1	ko:K01424,ko:K13051	ko00250,ko00460,ko01100,ko01110,map00250,map00460,map01100,map01110	-	R00485	RC00010,RC02798	ko00000,ko00001,ko01000,ko01002	-	-	-	Asparaginase_2	IPR000246	Peptidase T2, asparaginase 2	1	0	0	0	0	0	0	1	1	1	1	1	2	0	0	0	0	0	0	0	0	0	1	1	1	1	1
OG0004976	83344.XP_007923374.1	3.34e-169	498	COG0006@1|root,KOG2737@2759|Eukaryota,39SGG@33154|Opisthokonta,3NY5A@4751|Fungi,3QSAE@4890|Ascomycota,1ZYGV@147541|Dothideomycetes,3MF27@451867|Dothideomycetidae	4751|Fungi	E	Aminopeptidase P, N-terminal domain	PEPP	-	3.4.13.9	ko:K14213	-	-	-	-	ko00000,ko01000,ko01002	-	-	-	AMP_N,Peptidase_M24	IPR036005	Creatinase/aminopeptidase-like	0	0	0	0	0	0	0	1	1	1	2	1	1	0	0	0	0	0	0	0	0	0	1	1	1	1	1
OG0004976	83344.XP_007923374.1	3.34e-169	498	COG0006@1|root,KOG2737@2759|Eukaryota,39SGG@33154|Opisthokonta,3NY5A@4751|Fungi,3QSAE@4890|Ascomycota,1ZYGV@147541|Dothideomycetes,3MF27@451867|Dothideomycetidae	4751|Fungi	E	Aminopeptidase P, N-terminal domain	PEPP	-	3.4.13.9	ko:K14213	-	-	-	-	ko00000,ko01000,ko01002	-	-	-	AMP_N,Peptidase_M24	IPR052433	Xaa-Pro dipeptidase-like	0	0	0	0	0	0	0	1	1	1	2	1	1	0	0	0	0	0	0	0	0	0	1	1	1	1	1
OG0004976	83344.XP_007923374.1	3.34e-169	498	COG0006@1|root,KOG2737@2759|Eukaryota,39SGG@33154|Opisthokonta,3NY5A@4751|Fungi,3QSAE@4890|Ascomycota,1ZYGV@147541|Dothideomycetes,3MF27@451867|Dothideomycetidae	4751|Fungi	E	Aminopeptidase P, N-terminal domain	PEPP	-	3.4.13.9	ko:K14213	-	-	-	-	ko00000,ko01000,ko01002	-	-	-	AMP_N,Peptidase_M24	IPR029149	Creatinase/Aminopeptidase P/Spt16, N-terminal	0	0	0	0	0	0	0	1	1	1	2	1	1	0	0	0	0	0	0	0	0	0	1	1	1	1	1
OG0005002	63402.XP_003174780.1	0	1211	COG2939@1|root,KOG1282@2759|Eukaryota,39VCW@33154|Opisthokonta,3NUMH@4751|Fungi,3QM2M@4890|Ascomycota,20CB7@147545|Eurotiomycetes,3B1M8@33183|Onygenales,3FUEB@34384|Arthrodermataceae	4751|Fungi	EO	Belongs to the peptidase S10 family	-	-	3.4.16.6	ko:K01288	-	-	-	-	ko00000,ko01000,ko01002	-	-	-	Peptidase_S10	IPR029058	Alpha/Beta hydrolase fold	0	0	0	0	0	0	0	1	1	1	2	1	2	0	0	0	0	0	0	0	0	0	1	1	1	1	1
OG0005002	63402.XP_003174780.1	0	1211	COG2939@1|root,KOG1282@2759|Eukaryota,39VCW@33154|Opisthokonta,3NUMH@4751|Fungi,3QM2M@4890|Ascomycota,20CB7@147545|Eurotiomycetes,3B1M8@33183|Onygenales,3FUEB@34384|Arthrodermataceae	4751|Fungi	EO	Belongs to the peptidase S10 family	-	-	3.4.16.6	ko:K01288	-	-	-	-	ko00000,ko01000,ko01002	-	-	-	Peptidase_S10	IPR001563	Peptidase S10, serine carboxypeptidase	0	0	0	0	0	0	0	1	1	1	2	1	2	0	0	0	0	0	0	0	0	0	1	1	1	1	1
OG0005246	63402.XP_003169234.1	3.11e-161	455	COG2039@1|root,KOG4755@2759|Eukaryota,39R8H@33154|Opisthokonta,3P6Q6@4751|Fungi,3QTVS@4890|Ascomycota,20H5M@147545|Eurotiomycetes,3B3K8@33183|Onygenales,3FSQQ@34384|Arthrodermataceae	4751|Fungi	O	Pyroglutamyl peptidase	-	-	3.4.19.3	ko:K01304	-	-	-	-	ko00000,ko01000,ko01002	-	-	-	Peptidase_C15	IPR036440	Peptidase C15, pyroglutamyl peptidase I-like superfamily	1	0	0	0	0	0	0	1	1	1	0	1	0	0	0	0	0	0	0	0	0	0	1	1	1	1	1
OG0005246	63402.XP_003169234.1	3.11e-161	455	COG2039@1|root,KOG4755@2759|Eukaryota,39R8H@33154|Opisthokonta,3P6Q6@4751|Fungi,3QTVS@4890|Ascomycota,20H5M@147545|Eurotiomycetes,3B3K8@33183|Onygenales,3FSQQ@34384|Arthrodermataceae	4751|Fungi	O	Pyroglutamyl peptidase	-	-	3.4.19.3	ko:K01304	-	-	-	-	ko00000,ko01000,ko01002	-	-	-	Peptidase_C15	IPR016125	Peptidase C15, pyroglutamyl peptidase I-like	1	0	0	0	0	0	0	1	1	1	0	1	0	0	0	0	0	0	0	0	0	0	1	1	1	1	1
OG0006055	63418.F2Q0Z3	0	1516	COG5077@1|root,KOG1863@2759|Eukaryota,38CVI@33154|Opisthokonta,3NWAD@4751|Fungi,3QJFE@4890|Ascomycota,20D3C@147545|Eurotiomycetes,3B24M@33183|Onygenales,3FVPD@34384|Arthrodermataceae	4751|Fungi	O	ICP0-binding domain of Ubiquitin-specific protease 7	UBP15	GO:0003674,GO:0003824,GO:0004175,GO:0004843,GO:0005575,GO:0005622,GO:0005623,GO:0005634,GO:0005737,GO:0005777,GO:0005783,GO:0005829,GO:0006282,GO:0006464,GO:0006508,GO:0006807,GO:0008150,GO:0008152,GO:0008233,GO:0008234,GO:0009889,GO:0009890,GO:0009892,GO:0009987,GO:0010556,GO:0010558,GO:0010605,GO:0010992,GO:0010995,GO:0012505,GO:0016043,GO:0016579,GO:0016787,GO:0019219,GO:0019222,GO:0019538,GO:…	3.4.19.12	ko:K11838	ko04068,ko05168,ko05169,ko05203,map04068,map05168,map05169,map05203	-	-	-	ko00000,ko00001,ko01000,ko01002,ko04121	-	-	-	MATH,UCH,USP7_C2,USP7_ICP0_bdg	IPR038765	Papain-like cysteine peptidase superfamily	0	0	0	0	0	0	0	1	1	1	0	0	0	0	0	0	0	0	0	0	0	0	1	1	1	1	0
OG0006055	63418.F2Q0Z3	0	1516	COG5077@1|root,KOG1863@2759|Eukaryota,38CVI@33154|Opisthokonta,3NWAD@4751|Fungi,3QJFE@4890|Ascomycota,20D3C@147545|Eurotiomycetes,3B24M@33183|Onygenales,3FVPD@34384|Arthrodermataceae	4751|Fungi	O	ICP0-binding domain of Ubiquitin-specific protease 7	UBP15	GO:0003674,GO:0003824,GO:0004175,GO:0004843,GO:0005575,GO:0005622,GO:0005623,GO:0005634,GO:0005737,GO:0005777,GO:0005783,GO:0005829,GO:0006282,GO:0006464,GO:0006508,GO:0006807,GO:0008150,GO:0008152,GO:0008233,GO:0008234,GO:0009889,GO:0009890,GO:0009892,GO:0009987,GO:0010556,GO:0010558,GO:0010605,GO:0010992,GO:0010995,GO:0012505,GO:0016043,GO:0016579,GO:0016787,GO:0019219,GO:0019222,GO:0019538,GO:…	3.4.19.12	ko:K11838	ko04068,ko05168,ko05169,ko05203,map04068,map05168,map05169,map05203	-	-	-	ko00000,ko00001,ko01000,ko01002,ko04121	-	-	-	MATH,UCH,USP7_C2,USP7_ICP0_bdg	IPR050164	Ubiquitin carboxyl-terminal hydrolases	0	0	0	0	0	0	0	1	1	1	0	0	0	0	0	0	0	0	0	0	0	0	1	1	1	1	0
OG0006173	82508.K1VCQ7	0	1335	COG3590@1|root,KOG3624@2759|Eukaryota,38BNF@33154|Opisthokonta,3NWJF@4751|Fungi,3UY5F@5204|Basidiomycota,3VEPD@5234|Tremellales	4751|Fungi	E	Endothelin-converting enzyme 1	-	-	3.4.24.71	ko:K01415	-	-	-	-	ko00000,ko01000,ko01002,ko04147	-	-	-	Peptidase_M13,Peptidase_M13_N	IPR000718	Peptidase M13	2	0	0	0	0	0	0	0	0	0	0	0	0	1	1	2	2	2	2	2	2	2	0	0	0	0	0
OG0006366	5480.G8BIL3	0	884	COG0385@1|root,KOG4821@2759|Eukaryota,38RUU@33154|Opisthokonta,3NV02@4751|Fungi,3QQ65@4890|Ascomycota,3RTWB@4891|Saccharomycetes,479NG@766764|Debaryomycetaceae	4751|Fungi	S	SBF-like CPA transporter family (DUF4137)	RCH1	GO:0003674,GO:0005215,GO:0005319,GO:0005575,GO:0005623,GO:0006810,GO:0006869,GO:0008150,GO:0010876,GO:0015248,GO:0015850,GO:0015918,GO:0016020,GO:0016021,GO:0031224,GO:0033036,GO:0044425,GO:0044464,GO:0051179,GO:0051234,GO:0071702,GO:0071944	3.4.25.1	ko:K02731,ko:K14347	ko03050,map03050	M00337,M00340	-	-	ko00000,ko00001,ko00002,ko01000,ko01002,ko02000,ko03051,ko04131,ko04147	2.A.93.1	-	-	SBF_like	IPR016833	Putative sodium bile acid cotransporter	1	1	1	1	1	1	2	0	0	0	3	1	2	0	0	0	0	0	0	0	0	0	0	0	0	0	0
OG0006513	82508.K1WDX7	7.07e-266	748	COG0260@1|root,KOG2597@2759|Eukaryota,38DPB@33154|Opisthokonta,3NY6B@4751|Fungi,3UYMM@5204|Basidiomycota	4751|Fungi	E	leucine aminopeptidase	-	GO:0003674,GO:0003824,GO:0004177,GO:0006508,GO:0006807,GO:0008150,GO:0008152,GO:0008233,GO:0008238,GO:0009056,GO:0009057,GO:0016787,GO:0019538,GO:0030163,GO:0043170,GO:0044238,GO:0070011,GO:0071704,GO:0140096,GO:1901564,GO:1901565,GO:1901575	3.4.11.1,3.4.11.5	ko:K09611,ko:K11142	ko00330,ko00480,ko01100,map00330,map00480,map01100	-	R00135,R00899,R04951	RC00096,RC00141	ko00000,ko00001,ko01000,ko01002	-	-	-	Peptidase_M17,Peptidase_M17_N	IPR023042	Peptidase M17, leucine aminopeptidase	2	0	0	0	0	0	0	0	0	0	0	0	0	1	1	2	2	1	1	1	1	1	0	0	0	0	0
OG0006513	82508.K1WDX7	7.07e-266	748	COG0260@1|root,KOG2597@2759|Eukaryota,38DPB@33154|Opisthokonta,3NY6B@4751|Fungi,3UYMM@5204|Basidiomycota	4751|Fungi	E	leucine aminopeptidase	-	GO:0003674,GO:0003824,GO:0004177,GO:0006508,GO:0006807,GO:0008150,GO:0008152,GO:0008233,GO:0008238,GO:0009056,GO:0009057,GO:0016787,GO:0019538,GO:0030163,GO:0043170,GO:0044238,GO:0070011,GO:0071704,GO:0140096,GO:1901564,GO:1901565,GO:1901575	3.4.11.1,3.4.11.5	ko:K09611,ko:K11142	ko00330,ko00480,ko01100,map00330,map00480,map01100	-	R00135,R00899,R04951	RC00096,RC00141	ko00000,ko00001,ko01000,ko01002	-	-	-	Peptidase_M17,Peptidase_M17_N	IPR043472	Macro domain-like	2	0	0	0	0	0	0	0	0	0	0	0	0	1	1	2	2	1	1	1	1	1	0	0	0	0	0
OG0006513	82508.K1WDX7	7.07e-266	748	COG0260@1|root,KOG2597@2759|Eukaryota,38DPB@33154|Opisthokonta,3NY6B@4751|Fungi,3UYMM@5204|Basidiomycota	4751|Fungi	E	leucine aminopeptidase	-	GO:0003674,GO:0003824,GO:0004177,GO:0006508,GO:0006807,GO:0008150,GO:0008152,GO:0008233,GO:0008238,GO:0009056,GO:0009057,GO:0016787,GO:0019538,GO:0030163,GO:0043170,GO:0044238,GO:0070011,GO:0071704,GO:0140096,GO:1901564,GO:1901565,GO:1901575	3.4.11.1,3.4.11.5	ko:K09611,ko:K11142	ko00330,ko00480,ko01100,map00330,map00480,map01100	-	R00135,R00899,R04951	RC00096,RC00141	ko00000,ko00001,ko01000,ko01002	-	-	-	Peptidase_M17,Peptidase_M17_N	IPR011356	Peptidase M17, leucine aminopeptidase/peptidase B	2	0	0	0	0	0	0	0	0	0	0	0	0	1	1	2	2	1	1	1	1	1	0	0	0	0	0
OG0006693	1392244.V5GME1	0	918	COG1505@1|root,KOG2237@2759|Eukaryota,38DGX@33154|Opisthokonta,3NX4Q@4751|Fungi,3UYP4@5204|Basidiomycota,3N1TZ@452284|Ustilaginomycotina	4751|Fungi	O	Prolyl oligopeptidase, N-terminal beta-propeller domain	-	-	3.4.21.26	ko:K01322	ko04614,map04614	-	-	-	ko00000,ko00001,ko01000,ko01002	-	-	-	Peptidase_S9,Peptidase_S9_N	IPR051167	Prolyl oligopeptidase and macrocyclase	6	0	0	0	0	0	0	0	0	0	0	0	0	1	1	2	2	1	2	1	1	1	0	0	0	0	0
OG0006693	1392244.V5GME1	0	918	COG1505@1|root,KOG2237@2759|Eukaryota,38DGX@33154|Opisthokonta,3NX4Q@4751|Fungi,3UYP4@5204|Basidiomycota,3N1TZ@452284|Ustilaginomycotina	4751|Fungi	O	Prolyl oligopeptidase, N-terminal beta-propeller domain	-	-	3.4.21.26	ko:K01322	ko04614,map04614	-	-	-	ko00000,ko00001,ko01000,ko01002	-	-	-	Peptidase_S9,Peptidase_S9_N	IPR029058	Alpha/Beta hydrolase fold	6	0	0	0	0	0	0	0	0	0	0	0	0	1	1	2	2	1	2	1	1	1	0	0	0	0	0
OG0006827	63400.XP_003010393.1	2.41e-304	831	COG2355@1|root,KOG4127@2759|Eukaryota,38D9H@33154|Opisthokonta,3NUTJ@4751|Fungi,3QKPA@4890|Ascomycota,20AHQ@147545|Eurotiomycetes,3B11T@33183|Onygenales,3FW1R@34384|Arthrodermataceae	4751|Fungi	O	Belongs to the metallo-dependent hydrolases superfamily. Peptidase M19 family	-	GO:0008150,GO:0008152,GO:0009058,GO:0009403,GO:0009404,GO:0009987,GO:0019748,GO:0043385,GO:0043386,GO:0044237,GO:0044249,GO:0044550	3.4.13.19	ko:K01273	-	-	-	-	ko00000,ko00537,ko01000,ko01002,ko04147	-	-	-	Peptidase_M19	IPR008257	Peptidase M19	0	0	0	0	0	0	0	0	0	0	0	0	0	0	0	0	0	0	0	0	0	0	0	0	0	0	0
OG0006827	63400.XP_003010393.1	2.41e-304	831	COG2355@1|root,KOG4127@2759|Eukaryota,38D9H@33154|Opisthokonta,3NUTJ@4751|Fungi,3QKPA@4890|Ascomycota,20AHQ@147545|Eurotiomycetes,3B11T@33183|Onygenales,3FW1R@34384|Arthrodermataceae	4751|Fungi	O	Belongs to the metallo-dependent hydrolases superfamily. Peptidase M19 family	-	GO:0008150,GO:0008152,GO:0009058,GO:0009403,GO:0009404,GO:0009987,GO:0019748,GO:0043385,GO:0043386,GO:0044237,GO:0044249,GO:0044550	3.4.13.19	ko:K01273	-	-	-	-	ko00000,ko00537,ko01000,ko01002,ko04147	-	-	-	Peptidase_M19	IPR032466	Metal-dependent hydrolase	0	0	0	0	0	0	0	0	0	0	0	0	0	0	0	0	0	0	0	0	0	0	0	0	0	0	0
OG0006980	5478.XP_447088.1	0	2093	KOG1868@1|root,KOG1868@2759|Eukaryota,38FA8@33154|Opisthokonta,3NXZ3@4751|Fungi,3QPJH@4890|Ascomycota,3RT41@4891|Saccharomycetes,3RZDR@4893|Saccharomycetaceae	4751|Fungi	O	Belongs to the peptidase C19 family	-	GO:0003674,GO:0003824,GO:0004843,GO:0005575,GO:0005622,GO:0005623,GO:0005737,GO:0006464,GO:0006508,GO:0006807,GO:0008150,GO:0008152,GO:0008233,GO:0008234,GO:0009987,GO:0016579,GO:0016787,GO:0019538,GO:0019783,GO:0036211,GO:0036459,GO:0043170,GO:0043412,GO:0044237,GO:0044238,GO:0044260,GO:0044267,GO:0044424,GO:0044464,GO:0070011,GO:0070646,GO:0070647,GO:0071704,GO:0101005,GO:0140096,GO:1901564	3.4.19.12	ko:K11871	-	-	-	-	ko00000,ko01000,ko01002,ko04121	-	-	-	UCH	IPR036873	Rhodanese-like domain superfamily	0	1	1	1	1	1	3	0	0	0	0	0	0	0	0	0	0	0	0	0	0	0	0	0	0	0	0
OG0006980	5478.XP_447088.1	0	2093	KOG1868@1|root,KOG1868@2759|Eukaryota,38FA8@33154|Opisthokonta,3NXZ3@4751|Fungi,3QPJH@4890|Ascomycota,3RT41@4891|Saccharomycetes,3RZDR@4893|Saccharomycetaceae	4751|Fungi	O	Belongs to the peptidase C19 family	-	GO:0003674,GO:0003824,GO:0004843,GO:0005575,GO:0005622,GO:0005623,GO:0005737,GO:0006464,GO:0006508,GO:0006807,GO:0008150,GO:0008152,GO:0008233,GO:0008234,GO:0009987,GO:0016579,GO:0016787,GO:0019538,GO:0019783,GO:0036211,GO:0036459,GO:0043170,GO:0043412,GO:0044237,GO:0044238,GO:0044260,GO:0044267,GO:0044424,GO:0044464,GO:0070011,GO:0070646,GO:0070647,GO:0071704,GO:0101005,GO:0140096,GO:1901564	3.4.19.12	ko:K11871	-	-	-	-	ko00000,ko01000,ko01002,ko04121	-	-	-	UCH	IPR050185	Ubiquitin carboxyl-terminal hydrolase	0	1	1	1	1	1	3	0	0	0	0	0	0	0	0	0	0	0	0	0	0	0	0	0	0	0	0
OG0006980	5478.XP_447088.1	0	2093	KOG1868@1|root,KOG1868@2759|Eukaryota,38FA8@33154|Opisthokonta,3NXZ3@4751|Fungi,3QPJH@4890|Ascomycota,3RT41@4891|Saccharomycetes,3RZDR@4893|Saccharomycetaceae	4751|Fungi	O	Belongs to the peptidase C19 family	-	GO:0003674,GO:0003824,GO:0004843,GO:0005575,GO:0005622,GO:0005623,GO:0005737,GO:0006464,GO:0006508,GO:0006807,GO:0008150,GO:0008152,GO:0008233,GO:0008234,GO:0009987,GO:0016579,GO:0016787,GO:0019538,GO:0019783,GO:0036211,GO:0036459,GO:0043170,GO:0043412,GO:0044237,GO:0044238,GO:0044260,GO:0044267,GO:0044424,GO:0044464,GO:0070011,GO:0070646,GO:0070647,GO:0071704,GO:0101005,GO:0140096,GO:1901564	3.4.19.12	ko:K11871	-	-	-	-	ko00000,ko01000,ko01002,ko04121	-	-	-	UCH	IPR038765	Papain-like cysteine peptidase superfamily	0	1	1	1	1	1	3	0	0	0	0	0	0	0	0	0	0	0	0	0	0	0	0	0	0	0	0
OG0007061	82508.K1W9S1	0	875	COG0750@1|root,KOG2921@2759|Eukaryota,38CBR@33154|Opisthokonta,3P3QN@4751|Fungi,3V2RC@5204|Basidiomycota,3VEWD@5234|Tremellales	4751|Fungi	O	Peptidase family M50	-	-	3.4.24.85	ko:K07765	ko04141,map04141	-	-	-	ko00000,ko00001,ko01000,ko01002	-	-	-	Peptidase_M50	IPR001193	Membrane-bound transcription factor site-2 protease	1	0	0	0	0	0	0	0	0	0	0	0	0	1	1	1	2	2	0	0	1	1	0	0	0	0	0
OG0007313	72558.CBQ67928	0	1197	COG1404@1|root,KOG1114@2759|Eukaryota,38DD3@33154|Opisthokonta,3NY5S@4751|Fungi,3VA3E@5204|Basidiomycota,3MYRH@452284|Ustilaginomycotina	4751|Fungi	O	Tripeptidyl peptidase II	-	GO:0003674,GO:0003824,GO:0005575,GO:0005622,GO:0005623,GO:0005737,GO:0005829,GO:0006508,GO:0006807,GO:0008150,GO:0008152,GO:0008233,GO:0008236,GO:0008238,GO:0008240,GO:0016787,GO:0017171,GO:0019538,GO:0043170,GO:0044238,GO:0044424,GO:0044444,GO:0044464,GO:0070011,GO:0071704,GO:0140096,GO:1901564	3.4.14.10	ko:K01280	-	-	-	-	ko00000,ko01000,ko01002,ko03110	-	-	-	Peptidase_S8,TPPII	IPR036852	Peptidase S8/S53 domain superfamily	1	0	0	0	0	0	0	0	0	0	0	0	0	1	1	2	2	1	1	1	1	1	0	0	0	0	0
OG0007313	72558.CBQ67928	0	1197	COG1404@1|root,KOG1114@2759|Eukaryota,38DD3@33154|Opisthokonta,3NY5S@4751|Fungi,3VA3E@5204|Basidiomycota,3MYRH@452284|Ustilaginomycotina	4751|Fungi	O	Tripeptidyl peptidase II	-	GO:0003674,GO:0003824,GO:0005575,GO:0005622,GO:0005623,GO:0005737,GO:0005829,GO:0006508,GO:0006807,GO:0008150,GO:0008152,GO:0008233,GO:0008236,GO:0008238,GO:0008240,GO:0016787,GO:0017171,GO:0019538,GO:0043170,GO:0044238,GO:0044424,GO:0044444,GO:0044464,GO:0070011,GO:0071704,GO:0140096,GO:1901564	3.4.14.10	ko:K01280	-	-	-	-	ko00000,ko01000,ko01002,ko03110	-	-	-	Peptidase_S8,TPPII	IPR050131	Subtilisin-like serine protease	1	0	0	0	0	0	0	0	0	0	0	0	0	1	1	2	2	1	1	1	1	1	0	0	0	0	0
OG0007443	82508.K1VN39	2.26e-82	258	COG0705@1|root,KOG2980@2759|Eukaryota,38CY3@33154|Opisthokonta,3P4P6@4751|Fungi,3V15U@5204|Basidiomycota,3VFE4@5234|Tremellales	4751|Fungi	T	Rhomboid family	-	-	3.4.21.105	ko:K09650	-	-	-	-	ko00000,ko01000,ko01002,ko03029	-	-	-	Rhomboid	IPR035952	Rhomboid-like superfamily	1	0	0	0	0	0	0	0	0	0	0	0	0	1	1	2	1	1	0	0	0	1	0	0	0	0	0
OG0007443	82508.K1VN39	2.26e-82	258	COG0705@1|root,KOG2980@2759|Eukaryota,38CY3@33154|Opisthokonta,3P4P6@4751|Fungi,3V15U@5204|Basidiomycota,3VFE4@5234|Tremellales	4751|Fungi	T	Rhomboid family	-	-	3.4.21.105	ko:K09650	-	-	-	-	ko00000,ko01000,ko01002,ko03029	-	-	-	Rhomboid	IPR050925	Rhomboid protease S54	1	0	0	0	0	0	0	0	0	0	0	0	0	1	1	2	1	1	0	0	0	1	0	0	0	0	0
OG0007503	101852.XP_008082346.1	9.5e-118	355	COG3191@1|root,2QRNQ@2759|Eukaryota,38ZYW@33154|Opisthokonta,3NU2W@4751|Fungi,3QKI4@4890|Ascomycota	4751|Fungi	EQ	peptidase family	-	-	3.4.11.19	ko:K01266	-	-	-	-	ko00000,ko01000,ko01002	-	-	-	Peptidase_S58	IPR016117	ArgJ-like domain superfamily	0	0	0	0	0	0	0	0	0	0	2	1	2	0	0	0	0	0	0	0	0	0	1	1	1	1	1
OG0007503	101852.XP_008082346.1	9.5e-118	355	COG3191@1|root,2QRNQ@2759|Eukaryota,38ZYW@33154|Opisthokonta,3NU2W@4751|Fungi,3QKI4@4890|Ascomycota	4751|Fungi	EQ	peptidase family	-	-	3.4.11.19	ko:K01266	-	-	-	-	ko00000,ko01000,ko01002	-	-	-	Peptidase_S58	IPR005321	Peptidase S58, DmpA	0	0	0	0	0	0	0	0	0	0	2	1	2	0	0	0	0	0	0	0	0	0	1	1	1	1	1
OG0007559	63418.F2PYE7	3.56e-138	403	COG3579@1|root,KOG4128@2759|Eukaryota,38E6A@33154|Opisthokonta,3NVD9@4751|Fungi,3QKEW@4890|Ascomycota,20FJ6@147545|Eurotiomycetes,3B1S5@33183|Onygenales,3FTB3@34384|Arthrodermataceae	4751|Fungi	E	Papain family cysteine protease	LAP3	GO:0000096,GO:0000098,GO:0000122,GO:0000976,GO:0000977,GO:0000978,GO:0000987,GO:0001012,GO:0001067,GO:0003674,GO:0003676,GO:0003677,GO:0003690,GO:0003697,GO:0003723,GO:0003729,GO:0003824,GO:0005488,GO:0005575,GO:0005622,GO:0005623,GO:0005737,GO:0005739,GO:0006082,GO:0006355,GO:0006357,GO:0006508,GO:0006520,GO:0006790,GO:0006807,GO:0008150,GO:0008152,GO:0008233,GO:0008234,GO:0009056,GO:0009063,GO:…	3.4.22.40	ko:K01372	-	-	-	-	ko00000,ko01000,ko01002	-	-	-	Peptidase_C1_2	IPR004134	Peptidase C1B, bleomycin hydrolase	0	0	0	0	0	0	0	0	0	0	0	0	0	0	0	0	0	0	0	0	0	0	1	1	1	0	1
OG0007559	63418.F2PYE7	3.56e-138	403	COG3579@1|root,KOG4128@2759|Eukaryota,38E6A@33154|Opisthokonta,3NVD9@4751|Fungi,3QKEW@4890|Ascomycota,20FJ6@147545|Eurotiomycetes,3B1S5@33183|Onygenales,3FTB3@34384|Arthrodermataceae	4751|Fungi	E	Papain family cysteine protease	LAP3	GO:0000096,GO:0000098,GO:0000122,GO:0000976,GO:0000977,GO:0000978,GO:0000987,GO:0001012,GO:0001067,GO:0003674,GO:0003676,GO:0003677,GO:0003690,GO:0003697,GO:0003723,GO:0003729,GO:0003824,GO:0005488,GO:0005575,GO:0005622,GO:0005623,GO:0005737,GO:0005739,GO:0006082,GO:0006355,GO:0006357,GO:0006508,GO:0006520,GO:0006790,GO:0006807,GO:0008150,GO:0008152,GO:0008233,GO:0008234,GO:0009056,GO:0009063,GO:…	3.4.22.40	ko:K01372	-	-	-	-	ko00000,ko01000,ko01002	-	-	-	Peptidase_C1_2	IPR038765	Papain-like cysteine peptidase superfamily	0	0	0	0	0	0	0	0	0	0	0	0	0	0	0	0	0	0	0	0	0	0	1	1	1	0	1
OG0007942	82508.K1VNS3	5.69e-148	426	COG0705@1|root,KOG2980@2759|Eukaryota,3A5ZS@33154|Opisthokonta,3Q6XA@4751|Fungi,3V1S0@5204|Basidiomycota,3VFFB@5234|Tremellales	4751|Fungi	T	Rhomboid family	-	-	3.4.21.105	ko:K09650	-	-	-	-	ko00000,ko01000,ko01002,ko03029	-	-	-	Rhomboid	IPR050925	Rhomboid protease S54	1	0	0	0	0	0	0	0	0	0	0	0	0	1	1	1	2	0	0	0	0	0	0	0	0	0	0
OG0007942	82508.K1VNS3	5.69e-148	426	COG0705@1|root,KOG2980@2759|Eukaryota,3A5ZS@33154|Opisthokonta,3Q6XA@4751|Fungi,3V1S0@5204|Basidiomycota,3VFFB@5234|Tremellales	4751|Fungi	T	Rhomboid family	-	-	3.4.21.105	ko:K09650	-	-	-	-	ko00000,ko01000,ko01002,ko03029	-	-	-	Rhomboid	IPR035952	Rhomboid-like superfamily	1	0	0	0	0	0	0	0	0	0	0	0	0	1	1	1	2	0	0	0	0	0	0	0	0	0	0
OG0008677	63405.XP_002848625.1	0	1355	28SEW@1|root,2QZ4I@2759|Eukaryota,39JH4@33154|Opisthokonta,3Q3UA@4751|Fungi,3RKX3@4890|Ascomycota,20UX6@147545|Eurotiomycetes	4751|Fungi	G	Pro-kumamolisin, activation domain	-	-	3.4.14.9	ko:K01279	ko04142,map04142	-	-	-	ko00000,ko00001,ko01000,ko01002,ko03110,ko04147	-	-	-	Pro-kuma_activ	IPR036852	Peptidase S8/S53 domain superfamily	0	0	0	0	0	0	0	0	0	0	1	1	1	0	0	0	0	0	0	0	0	0	0	0	1	1	1
OG0008677	63405.XP_002848625.1	0	1355	28SEW@1|root,2QZ4I@2759|Eukaryota,39JH4@33154|Opisthokonta,3Q3UA@4751|Fungi,3RKX3@4890|Ascomycota,20UX6@147545|Eurotiomycetes	4751|Fungi	G	Pro-kumamolisin, activation domain	-	-	3.4.14.9	ko:K01279	ko04142,map04142	-	-	-	ko00000,ko00001,ko01000,ko01002,ko03110,ko04147	-	-	-	Pro-kuma_activ	IPR050819	Tripeptidyl-peptidase I and related peptidases	0	0	0	0	0	0	0	0	0	0	1	1	1	0	0	0	0	0	0	0	0	0	0	0	1	1	1
OG0008996	5482.XP_002547785.1	8.81e-166	501	COG5077@1|root,KOG1863@2759|Eukaryota,38CVI@33154|Opisthokonta,3NWAD@4751|Fungi,3QJFE@4890|Ascomycota,3RTDW@4891|Saccharomycetes,479N1@766764|Debaryomycetaceae	4751|Fungi	O	Belongs to the peptidase C19 family	UBP15	GO:0003674,GO:0003824,GO:0004175,GO:0004843,GO:0005575,GO:0005622,GO:0005623,GO:0005634,GO:0005737,GO:0005777,GO:0005783,GO:0005829,GO:0006282,GO:0006464,GO:0006508,GO:0006807,GO:0008150,GO:0008152,GO:0008233,GO:0008234,GO:0009889,GO:0009890,GO:0009892,GO:0009987,GO:0010556,GO:0010558,GO:0010605,GO:0010992,GO:0010995,GO:0012505,GO:0016043,GO:0016579,GO:0016787,GO:0019219,GO:0019222,GO:0019538,GO:…	3.4.19.12	ko:K11838	ko04068,ko05168,ko05169,ko05203,map04068,map05168,map05169,map05203	-	-	-	ko00000,ko00001,ko01000,ko01002,ko04121	-	-	-	MATH,UCH,USP7_C2,USP7_ICP0_bdg	IPR050804	MATH and coiled-coil domain-containing protein	0	0	0	0	0	0	1	0	1	0	0	0	0	0	0	0	0	0	0	0	0	0	1	0	0	1	1
OG0009388	5480.G8B7S5	0	1795	COG2234@1|root,KOG2195@2759|Eukaryota,38ERK@33154|Opisthokonta,3NUU3@4751|Fungi,3QKGW@4890|Ascomycota,3RSIU@4891|Saccharomycetes,479ZF@766764|Debaryomycetaceae	4751|Fungi	OP	Belongs to the peptidase M28 family	-	GO:0005575,GO:0005622,GO:0005623,GO:0005737,GO:0005783,GO:0006605,GO:0006623,GO:0006810,GO:0006886,GO:0007034,GO:0008104,GO:0008150,GO:0012505,GO:0015031,GO:0015833,GO:0033036,GO:0033365,GO:0034613,GO:0042886,GO:0043226,GO:0043227,GO:0043229,GO:0043231,GO:0044424,GO:0044444,GO:0044464,GO:0045184,GO:0046907,GO:0051179,GO:0051234,GO:0051641,GO:0051649,GO:0070727,GO:0071702,GO:0071705,GO:0072594,GO:…	3.4.17.21	ko:K01301	-	-	-	-	ko00000,ko01000,ko01002	-	-	-	PA,Peptidase_M28,TFR_dimer	IPR046450	PA domain superfamily	0	1	1	1	1	1	1	0	0	0	0	0	0	0	0	0	0	0	0	0	0	0	0	0	0	0	0
OG0009388	5480.G8B7S5	0	1795	COG2234@1|root,KOG2195@2759|Eukaryota,38ERK@33154|Opisthokonta,3NUU3@4751|Fungi,3QKGW@4890|Ascomycota,3RSIU@4891|Saccharomycetes,479ZF@766764|Debaryomycetaceae	4751|Fungi	OP	Belongs to the peptidase M28 family	-	GO:0005575,GO:0005622,GO:0005623,GO:0005737,GO:0005783,GO:0006605,GO:0006623,GO:0006810,GO:0006886,GO:0007034,GO:0008104,GO:0008150,GO:0012505,GO:0015031,GO:0015833,GO:0033036,GO:0033365,GO:0034613,GO:0042886,GO:0043226,GO:0043227,GO:0043229,GO:0043231,GO:0044424,GO:0044444,GO:0044464,GO:0045184,GO:0046907,GO:0051179,GO:0051234,GO:0051641,GO:0051649,GO:0070727,GO:0071702,GO:0071705,GO:0072594,GO:…	3.4.17.21	ko:K01301	-	-	-	-	ko00000,ko01000,ko01002	-	-	-	PA,Peptidase_M28,TFR_dimer	IPR039373	Transferrin receptor protein 1/Glutamate carboxypeptidase 2-like	0	1	1	1	1	1	1	0	0	0	0	0	0	0	0	0	0	0	0	0	0	0	0	0	0	0	0
OG0009688	42374.XP_002419203.1	2.1e-277	763	KOG1674@1|root,KOG1674@2759|Eukaryota,39TH9@33154|Opisthokonta,3P287@4751|Fungi,3QSNT@4890|Ascomycota,3RVPC@4891|Saccharomycetes,47CPJ@766764|Debaryomycetaceae	4751|Fungi	S	Cyclin	-	-	3.4.13.9	ko:K14213	-	-	-	-	ko00000,ko01000,ko01002	-	-	-	Cyclin			0	1	1	1	1	1	1	0	0	0	0	0	0	0	0	0	0	0	0	0	0	0	0	0	0	0	0
OG0009969	5478.XP_448611.1	0	1569	COG2234@1|root,KOG2195@2759|Eukaryota,38ERK@33154|Opisthokonta,3NV1R@4751|Fungi,3QMSF@4890|Ascomycota,3RR7P@4891|Saccharomycetes,3RXVT@4893|Saccharomycetaceae	4751|Fungi	OP	to Saccharomyces cerevisiae TRE2 (YOR256C) and TRE1 (YPL176C)	-	GO:0000322,GO:0000323,GO:0000324,GO:0000329,GO:0005575,GO:0005622,GO:0005623,GO:0005737,GO:0005773,GO:0005774,GO:0006508,GO:0006511,GO:0006807,GO:0006810,GO:0006886,GO:0007034,GO:0008104,GO:0008150,GO:0008152,GO:0009056,GO:0009057,GO:0009987,GO:0015031,GO:0015833,GO:0016020,GO:0016021,GO:0016192,GO:0016197,GO:0019538,GO:0019941,GO:0030163,GO:0031090,GO:0031166,GO:0031224,GO:0031300,GO:0031301,GO:…	3.4.17.21	ko:K01301	-	-	-	-	ko00000,ko01000,ko01002	-	-	-	PA,Peptidase_M28,TFR_dimer	IPR036757	Transferrin receptor-like, dimerisation domain superfamily	0	0	0	0	0	0	0	0	0	0	0	0	0	0	0	0	0	0	0	0	0	0	0	0	0	0	0
OG0009969	5478.XP_448611.1	0	1569	COG2234@1|root,KOG2195@2759|Eukaryota,38ERK@33154|Opisthokonta,3NV1R@4751|Fungi,3QMSF@4890|Ascomycota,3RR7P@4891|Saccharomycetes,3RXVT@4893|Saccharomycetaceae	4751|Fungi	OP	to Saccharomyces cerevisiae TRE2 (YOR256C) and TRE1 (YPL176C)	-	GO:0000322,GO:0000323,GO:0000324,GO:0000329,GO:0005575,GO:0005622,GO:0005623,GO:0005737,GO:0005773,GO:0005774,GO:0006508,GO:0006511,GO:0006807,GO:0006810,GO:0006886,GO:0007034,GO:0008104,GO:0008150,GO:0008152,GO:0009056,GO:0009057,GO:0009987,GO:0015031,GO:0015833,GO:0016020,GO:0016021,GO:0016192,GO:0016197,GO:0019538,GO:0019941,GO:0030163,GO:0031090,GO:0031166,GO:0031224,GO:0031300,GO:0031301,GO:…	3.4.17.21	ko:K01301	-	-	-	-	ko00000,ko01000,ko01002	-	-	-	PA,Peptidase_M28,TFR_dimer	IPR046450	PA domain superfamily	0	0	0	0	0	0	0	0	0	0	0	0	0	0	0	0	0	0	0	0	0	0	0	0	0	0	0
OG0009969	5478.XP_448611.1	0	1569	COG2234@1|root,KOG2195@2759|Eukaryota,38ERK@33154|Opisthokonta,3NV1R@4751|Fungi,3QMSF@4890|Ascomycota,3RR7P@4891|Saccharomycetes,3RXVT@4893|Saccharomycetaceae	4751|Fungi	OP	to Saccharomyces cerevisiae TRE2 (YOR256C) and TRE1 (YPL176C)	-	GO:0000322,GO:0000323,GO:0000324,GO:0000329,GO:0005575,GO:0005622,GO:0005623,GO:0005737,GO:0005773,GO:0005774,GO:0006508,GO:0006511,GO:0006807,GO:0006810,GO:0006886,GO:0007034,GO:0008104,GO:0008150,GO:0008152,GO:0009056,GO:0009057,GO:0009987,GO:0015031,GO:0015833,GO:0016020,GO:0016021,GO:0016192,GO:0016197,GO:0019538,GO:0019941,GO:0030163,GO:0031090,GO:0031166,GO:0031224,GO:0031300,GO:0031301,GO:…	3.4.17.21	ko:K01301	-	-	-	-	ko00000,ko01000,ko01002	-	-	-	PA,Peptidase_M28,TFR_dimer	IPR039373	Transferrin receptor protein 1/Glutamate carboxypeptidase 2-like	0	0	0	0	0	0	0	0	0	0	0	0	0	0	0	0	0	0	0	0	0	0	0	0	0	0	0
OG0010107	82508.K1WIS9	0	935	COG5077@1|root,KOG1863@2759|Eukaryota,38BBV@33154|Opisthokonta,3P03H@4751|Fungi,3UXYU@5204|Basidiomycota,3VDK1@5234|Tremellales	4751|Fungi	O	Ubiquitin carboxyl-terminal hydrolase	-	-	3.4.19.12	ko:K11858	-	-	-	-	ko00000,ko01000,ko01002,ko04121	-	-	-	UCH,ubiquitin	IPR050164	Ubiquitin carboxyl-terminal hydrolases	1	0	0	0	0	0	0	0	0	0	0	0	0	0	0	0	0	0	0	0	0	0	0	0	0	0	0
OG0010107	82508.K1WIS9	0	935	COG5077@1|root,KOG1863@2759|Eukaryota,38BBV@33154|Opisthokonta,3P03H@4751|Fungi,3UXYU@5204|Basidiomycota,3VDK1@5234|Tremellales	4751|Fungi	O	Ubiquitin carboxyl-terminal hydrolase	-	-	3.4.19.12	ko:K11858	-	-	-	-	ko00000,ko01000,ko01002,ko04121	-	-	-	UCH,ubiquitin	IPR038765	Papain-like cysteine peptidase superfamily	1	0	0	0	0	0	0	0	0	0	0	0	0	0	0	0	0	0	0	0	0	0	0	0	0	0	0
OG0010107	82508.K1WIS9	0	935	COG5077@1|root,KOG1863@2759|Eukaryota,38BBV@33154|Opisthokonta,3P03H@4751|Fungi,3UXYU@5204|Basidiomycota,3VDK1@5234|Tremellales	4751|Fungi	O	Ubiquitin carboxyl-terminal hydrolase	-	-	3.4.19.12	ko:K11858	-	-	-	-	ko00000,ko01000,ko01002,ko04121	-	-	-	UCH,ubiquitin	IPR029071	Ubiquitin-like domain superfamily	1	0	0	0	0	0	0	0	0	0	0	0	0	0	0	0	0	0	0	0	0	0	0	0	0	0	0
OG0010594	430998.XP_007676575.1	3.12e-45	174	KOG1865@1|root,KOG1865@2759|Eukaryota,3A7W0@33154|Opisthokonta,3P65S@4751|Fungi,3QY1Q@4890|Ascomycota,205IZ@147541|Dothideomycetes,3MMZC@451867|Dothideomycetidae	4751|Fungi	O	Ubiquitin carboxyl-terminal hydrolase	-	-	3.4.19.12	ko:K11855	-	-	-	-	ko00000,ko01000,ko01002,ko04121	-	-	-	UCH	IPR050164	Ubiquitin carboxyl-terminal hydrolases	0	0	0	0	0	0	0	0	0	0	2	1	2	0	0	0	0	0	0	0	0	0	0	0	0	0	0
OG0010594	430998.XP_007676575.1	3.12e-45	174	KOG1865@1|root,KOG1865@2759|Eukaryota,3A7W0@33154|Opisthokonta,3P65S@4751|Fungi,3QY1Q@4890|Ascomycota,205IZ@147541|Dothideomycetes,3MMZC@451867|Dothideomycetidae	4751|Fungi	O	Ubiquitin carboxyl-terminal hydrolase	-	-	3.4.19.12	ko:K11855	-	-	-	-	ko00000,ko01000,ko01002,ko04121	-	-	-	UCH	IPR038765	Papain-like cysteine peptidase superfamily	0	0	0	0	0	0	0	0	0	0	2	1	2	0	0	0	0	0	0	0	0	0	0	0	0	0	0
OG0011049	160860.XP_007353564.1	4.02e-25	116	COG0501@1|root,KOG2719@2759|Eukaryota,38C73@33154|Opisthokonta,3NUIC@4751|Fungi,3UYUB@5204|Basidiomycota,227V4@155619|Agaricomycetes,3H15J@355688|Agaricomycetes incertae sedis	4751|Fungi	O	CAAX prenyl protease N-terminal, five membrane helices	STE24	GO:0003674,GO:0003824,GO:0004175,GO:0004222,GO:0005575,GO:0005622,GO:0005623,GO:0005634,GO:0005635,GO:0005637,GO:0005737,GO:0005739,GO:0005740,GO:0005741,GO:0005783,GO:0005789,GO:0006508,GO:0006807,GO:0007323,GO:0008150,GO:0008152,GO:0008233,GO:0008237,GO:0009987,GO:0010467,GO:0012505,GO:0016020,GO:0016021,GO:0016485,GO:0016787,GO:0019538,GO:0019866,GO:0019867,GO:0030176,GO:0031090,GO:0031136,GO:…	3.4.24.84	ko:K06013	ko00900,ko01130,map00900,map01130	-	R09845	RC00141	ko00000,ko00001,ko01000,ko01002,ko04147	-	-	-	Peptidase_M48,Peptidase_M48_N			0	0	0	0	0	0	0	0	0	0	0	0	0	0	0	0	0	1	1	1	1	1	0	0	0	0	0
OG0011099	63405.XP_002846325.1	3.65e-147	457	COG5560@1|root,KOG1870@2759|Eukaryota,38FGF@33154|Opisthokonta,3NU7E@4751|Fungi,3QQE0@4890|Ascomycota,20FUJ@147545|Eurotiomycetes,3B13I@33183|Onygenales,3FTVI@34384|Arthrodermataceae	4751|Fungi	O	Belongs to the peptidase C19 family	-	GO:0003674,GO:0003824,GO:0004843,GO:0005575,GO:0005622,GO:0005623,GO:0005634,GO:0005737,GO:0006508,GO:0006807,GO:0008150,GO:0008152,GO:0008233,GO:0008234,GO:0016787,GO:0019538,GO:0019783,GO:0036459,GO:0043170,GO:0043226,GO:0043227,GO:0043229,GO:0043231,GO:0044238,GO:0044424,GO:0044464,GO:0070011,GO:0071704,GO:0101005,GO:0140096,GO:1901564	3.4.19.12	ko:K11835	-	-	-	-	ko00000,ko01000,ko01002,ko04121	-	-	-	DUSP,UCH			0	0	0	0	0	0	0	0	0	0	0	0	0	0	0	0	0	0	0	0	0	0	0	0	1	0	1
OG0011248	82508.K1VCS3	0	882	COG0006@1|root,KOG2413@2759|Eukaryota,38B6V@33154|Opisthokonta,3P119@4751|Fungi,3UZR5@5204|Basidiomycota,3VCZ7@5234|Tremellales	4751|Fungi	E	Creatinase/Prolidase N-terminal domain	-	-	3.4.11.9	ko:K01262	-	-	-	-	ko00000,ko01000,ko01002	-	-	-	Creatinase_N,Creatinase_N_2,Peptidase_M24,Peptidase_M24_C	IPR029149	Creatinase/Aminopeptidase P/Spt16, N-terminal	0	0	0	0	0	0	0	0	0	0	0	0	0	0	0	0	0	0	0	0	0	0	0	0	0	0	0
OG0011248	82508.K1VCS3	0	882	COG0006@1|root,KOG2413@2759|Eukaryota,38B6V@33154|Opisthokonta,3P119@4751|Fungi,3UZR5@5204|Basidiomycota,3VCZ7@5234|Tremellales	4751|Fungi	E	Creatinase/Prolidase N-terminal domain	-	-	3.4.11.9	ko:K01262	-	-	-	-	ko00000,ko01000,ko01002	-	-	-	Creatinase_N,Creatinase_N_2,Peptidase_M24,Peptidase_M24_C	IPR050422	Xaa-Pro aminopeptidase P	0	0	0	0	0	0	0	0	0	0	0	0	0	0	0	0	0	0	0	0	0	0	0	0	0	0	0
OG0011248	82508.K1VCS3	0	882	COG0006@1|root,KOG2413@2759|Eukaryota,38B6V@33154|Opisthokonta,3P119@4751|Fungi,3UZR5@5204|Basidiomycota,3VCZ7@5234|Tremellales	4751|Fungi	E	Creatinase/Prolidase N-terminal domain	-	-	3.4.11.9	ko:K01262	-	-	-	-	ko00000,ko01000,ko01002	-	-	-	Creatinase_N,Creatinase_N_2,Peptidase_M24,Peptidase_M24_C	IPR036005	Creatinase/aminopeptidase-like	0	0	0	0	0	0	0	0	0	0	0	0	0	0	0	0	0	0	0	0	0	0	0	0	0	0	0
OG0011248	82508.K1VCS3	0	882	COG0006@1|root,KOG2413@2759|Eukaryota,38B6V@33154|Opisthokonta,3P119@4751|Fungi,3UZR5@5204|Basidiomycota,3VCZ7@5234|Tremellales	4751|Fungi	E	Creatinase/Prolidase N-terminal domain	-	-	3.4.11.9	ko:K01262	-	-	-	-	ko00000,ko01000,ko01002	-	-	-	Creatinase_N,Creatinase_N_2,Peptidase_M24,Peptidase_M24_C	IPR036259	MFS transporter superfamily	0	0	0	0	0	0	0	0	0	0	0	0	0	0	0	0	0	0	0	0	0	0	0	0	0	0	0
OG0012337	84751.XP_007881177.1	4.26e-28	117	KOG1868@1|root,KOG1868@2759|Eukaryota,38DC9@33154|Opisthokonta,3NX9E@4751|Fungi,3UYP9@5204|Basidiomycota,3N4EX@452284|Ustilaginomycotina	4751|Fungi	O	USP8 dimerisation domain	DOA4	GO:0000131,GO:0000502,GO:0002039,GO:0003674,GO:0003824,GO:0004175,GO:0004197,GO:0004843,GO:0005488,GO:0005515,GO:0005575,GO:0005622,GO:0005623,GO:0005634,GO:0005654,GO:0005737,GO:0005739,GO:0005768,GO:0005829,GO:0005933,GO:0005935,GO:0006139,GO:0006259,GO:0006275,GO:0006281,GO:0006283,GO:0006289,GO:0006325,GO:0006355,GO:0006464,GO:0006508,GO:0006511,GO:0006725,GO:0006807,GO:0006810,GO:0006811,GO:…	3.4.19.12	ko:K11839	ko04137,ko04144,ko04934,map04137,map04144,map04934	-	-	-	ko00000,ko00001,ko01000,ko01002,ko04121,ko04131	-	-	-	Rhodanese,UCH,USP8_dimer			0	0	0	0	0	0	0	0	0	0	0	0	0	1	1	1	1	0	0	0	0	0	0	0	0	0	0
OG0012985	82508.K1WDN2	0	897	2CXKC@1|root,2RY6I@2759|Eukaryota,3A38Q@33154|Opisthokonta,3P3QK@4751|Fungi,3V0XM@5204|Basidiomycota,3VD6Z@5234|Tremellales	4751|Fungi	-	-	-	-	3.4.25.1	ko:K02725,ko:K06236	ko03050,ko04151,ko04510,ko04512,ko04611,ko04926,ko04933,ko04974,ko05146,ko05165,map03050,map04151,map04510,map04512,map04611,map04926,map04933,map04974,map05146,map05165	M00337,M00340	-	-	ko00000,ko00001,ko00002,ko00536,ko01000,ko01002,ko03051,ko04147,ko04516	-	-	-	-			0	0	0	0	0	0	0	0	0	0	0	0	0	0	0	0	0	0	0	0	0	0	0	0	0	0	0
OG0013519	82508.K1VKP1	4.5e-166	498	COG5560@1|root,KOG1873@2759|Eukaryota,38DXM@33154|Opisthokonta,3P3F4@4751|Fungi,3V0S8@5204|Basidiomycota,3VEX5@5234|Tremellales	4751|Fungi	O	Ubiquitin carboxyl-terminal hydrolase	-	-	3.4.19.12	ko:K11844	-	-	-	-	ko00000,ko01000,ko01002,ko04121	-	-	-	UCH,zf-UBP	IPR038765	Papain-like cysteine peptidase superfamily	0	0	0	0	0	0	0	0	0	0	0	0	0	0	0	0	0	0	0	0	0	0	0	0	0	0	0
OG0013519	82508.K1VKP1	4.5e-166	498	COG5560@1|root,KOG1873@2759|Eukaryota,38DXM@33154|Opisthokonta,3P3F4@4751|Fungi,3V0S8@5204|Basidiomycota,3VEX5@5234|Tremellales	4751|Fungi	O	Ubiquitin carboxyl-terminal hydrolase	-	-	3.4.19.12	ko:K11844	-	-	-	-	ko00000,ko01000,ko01002,ko04121	-	-	-	UCH,zf-UBP	IPR050164	Ubiquitin carboxyl-terminal hydrolases	0	0	0	0	0	0	0	0	0	0	0	0	0	0	0	0	0	0	0	0	0	0	0	0	0	0	0
OG0014075	28564.XP_002481148.1	2.33e-75	255	COG0339@1|root,KOG2089@2759|Eukaryota,38SFI@33154|Opisthokonta,3NX1E@4751|Fungi,3QJCH@4890|Ascomycota,20BAI@147545|Eurotiomycetes,3S3SR@5042|Eurotiales	4751|Fungi	O	Peptidase family M3	PRD1	GO:0000322,GO:0000323,GO:0000324,GO:0003674,GO:0003824,GO:0004175,GO:0004222,GO:0005575,GO:0005622,GO:0005623,GO:0005737,GO:0005739,GO:0005740,GO:0005758,GO:0005773,GO:0005794,GO:0006508,GO:0006518,GO:0006807,GO:0008150,GO:0008152,GO:0008233,GO:0008237,GO:0009987,GO:0012505,GO:0016787,GO:0019538,GO:0031967,GO:0031970,GO:0031974,GO:0031975,GO:0034641,GO:0043170,GO:0043226,GO:0043227,GO:0043229,GO:…	3.4.24.37	ko:K01405,ko:K13726	-	-	-	-	ko00000,ko01000,ko01002	-	-	-	Peptidase_M3	IPR045090	Peptidase M3A/M3B	0	0	0	0	0	0	0	0	0	0	1	1	1	0	0	0	0	0	0	0	0	0	0	0	0	0	0
OG0014244	83344.XP_007920930.1	3.93e-34	132	COG1404@1|root,KOG1153@2759|Eukaryota,39SX0@33154|Opisthokonta,3P0HY@4751|Fungi,3QPMX@4890|Ascomycota,1ZYBQ@147541|Dothideomycetes,3MIVV@451867|Dothideomycetidae	4751|Fungi	O	Belongs to the peptidase S8 family	-	-	3.4.21.48	ko:K01336	ko04138,map04138	-	-	-	ko00000,ko00001,ko01000,ko01002,ko03110	-	-	-	Peptidase_S8	IPR050131	Subtilisin-like serine protease	0	0	0	0	0	0	0	0	0	0	1	1	1	0	0	0	0	0	0	0	0	0	0	0	0	0	0
OG0014244	83344.XP_007920930.1	3.93e-34	132	COG1404@1|root,KOG1153@2759|Eukaryota,39SX0@33154|Opisthokonta,3P0HY@4751|Fungi,3QPMX@4890|Ascomycota,1ZYBQ@147541|Dothideomycetes,3MIVV@451867|Dothideomycetidae	4751|Fungi	O	Belongs to the peptidase S8 family	-	-	3.4.21.48	ko:K01336	ko04138,map04138	-	-	-	ko00000,ko00001,ko01000,ko01002,ko03110	-	-	-	Peptidase_S8	IPR036852	Peptidase S8/S53 domain superfamily	0	0	0	0	0	0	0	0	0	0	1	1	1	0	0	0	0	0	0	0	0	0	0	0	0	0	0
OG0014589	1047171.Mycgr3P104550	2.37e-101	306	KOG1674@1|root,KOG1674@2759|Eukaryota,39TH9@33154|Opisthokonta,3P287@4751|Fungi,3QSNT@4890|Ascomycota,20269@147541|Dothideomycetes,3MIW2@451867|Dothideomycetidae	4751|Fungi	S	Cyclin	-	-	3.4.13.9	ko:K14213	-	-	-	-	ko00000,ko01000,ko01002	-	-	-	Cyclin	IPR013922	Cyclin PHO80-like	0	0	0	0	0	0	0	0	0	0	0	1	2	0	0	0	0	0	0	0	0	0	0	0	0	0	0
OG0014589	1047171.Mycgr3P104550	2.37e-101	306	KOG1674@1|root,KOG1674@2759|Eukaryota,39TH9@33154|Opisthokonta,3P287@4751|Fungi,3QSNT@4890|Ascomycota,20269@147541|Dothideomycetes,3MIW2@451867|Dothideomycetidae	4751|Fungi	S	Cyclin	-	-	3.4.13.9	ko:K14213	-	-	-	-	ko00000,ko01000,ko01002	-	-	-	Cyclin	IPR036915	Cyclin-like superfamily	0	0	0	0	0	0	0	0	0	0	0	1	2	0	0	0	0	0	0	0	0	0	0	0	0	0	0
OG0014646	120017.I2G000	7.63e-11	71.6	COG5077@1|root,KOG1863@2759|Eukaryota,39PGC@33154|Opisthokonta,3NVJH@4751|Fungi,3UZHT@5204|Basidiomycota,3N4YT@452284|Ustilaginomycotina	4751|Fungi	O	A repeated domain in UCH-protein	UBP2	GO:0003674,GO:0003824,GO:0004843,GO:0005575,GO:0005622,GO:0005623,GO:0005737,GO:0006464,GO:0006508,GO:0006511,GO:0006807,GO:0006950,GO:0006979,GO:0008150,GO:0008152,GO:0008233,GO:0008234,GO:0009056,GO:0009057,GO:0009987,GO:0010992,GO:0016579,GO:0016787,GO:0019538,GO:0019725,GO:0019783,GO:0019941,GO:0030163,GO:0033554,GO:0034599,GO:0036211,GO:0036459,GO:0042221,GO:0042592,GO:0043162,GO:0043170,GO:…	3.4.19.12	ko:K11849	ko04657,map04657	-	-	-	ko00000,ko00001,ko01000,ko01002,ko04121	-	-	-	RPT,UCH			0	0	0	0	0	0	0	0	0	0	0	0	0	1	1	0	1	0	0	0	0	0	0	0	0	0	0
OG0015950	82508.K1WG46	1.9e-114	337	COG0024@1|root,KOG2738@2759|Eukaryota,38BS3@33154|Opisthokonta,3P0AG@4751|Fungi,3V47J@5204|Basidiomycota,3VERD@5234|Tremellales	4751|Fungi	O	Removes the N-terminal methionine from nascent proteins. The N-terminal methionine is often cleaved when the second residue in the primary sequence is small and uncharged (Met-Ala-, Cys, Gly, Pro, Ser, Thr, or Val)	-	-	3.4.11.18	ko:K01265	-	-	-	-	ko00000,ko01000,ko01002	-	-	-	Peptidase_M24	IPR036005	Creatinase/aminopeptidase-like	0	0	0	0	0	0	0	0	0	0	0	0	0	0	0	0	0	0	0	0	0	0	0	0	0	0	0
OG0016220	83344.XP_007928201.1	1.18e-22	107	KOG1339@1|root,KOG1339@2759|Eukaryota,38D42@33154|Opisthokonta,3NW5J@4751|Fungi,3QKGP@4890|Ascomycota,1ZYHY@147541|Dothideomycetes,3MJJZ@451867|Dothideomycetidae	4751|Fungi	O	Belongs to the peptidase A1 family	APR1	GO:0000322,GO:0000323,GO:0000324,GO:0003674,GO:0003824,GO:0004175,GO:0004190,GO:0005575,GO:0005576,GO:0005618,GO:0005622,GO:0005623,GO:0005737,GO:0005739,GO:0005773,GO:0005783,GO:0005886,GO:0006508,GO:0006807,GO:0006914,GO:0006950,GO:0007154,GO:0008104,GO:0008150,GO:0008152,GO:0008233,GO:0009056,GO:0009057,GO:0009267,GO:0009277,GO:0009605,GO:0009897,GO:0009986,GO:0009987,GO:0009991,GO:0012505,GO:…	3.4.23.25	ko:K01381	ko04138,map04138	-	-	-	ko00000,ko00001,ko01000,ko01002	-	-	-	Asp	IPR001461	Aspartic peptidase A1	0	0	0	0	0	0	0	0	0	0	0	0	0	0	0	0	0	0	0	0	0	0	0	0	0	0	0
OG0016220	83344.XP_007928201.1	1.18e-22	107	KOG1339@1|root,KOG1339@2759|Eukaryota,38D42@33154|Opisthokonta,3NW5J@4751|Fungi,3QKGP@4890|Ascomycota,1ZYHY@147541|Dothideomycetes,3MJJZ@451867|Dothideomycetidae	4751|Fungi	O	Belongs to the peptidase A1 family	APR1	GO:0000322,GO:0000323,GO:0000324,GO:0003674,GO:0003824,GO:0004175,GO:0004190,GO:0005575,GO:0005576,GO:0005618,GO:0005622,GO:0005623,GO:0005737,GO:0005739,GO:0005773,GO:0005783,GO:0005886,GO:0006508,GO:0006807,GO:0006914,GO:0006950,GO:0007154,GO:0008104,GO:0008150,GO:0008152,GO:0008233,GO:0009056,GO:0009057,GO:0009267,GO:0009277,GO:0009605,GO:0009897,GO:0009986,GO:0009987,GO:0009991,GO:0012505,GO:…	3.4.23.25	ko:K01381	ko04138,map04138	-	-	-	ko00000,ko00001,ko01000,ko01002	-	-	-	Asp	IPR021109	Aspartic peptidase domain superfamily	0	0	0	0	0	0	0	0	0	0	0	0	0	0	0	0	0	0	0	0	0	0	0	0	0	0	0
OG0016397	82508.K1VCS3	0	869	COG0006@1|root,KOG2413@2759|Eukaryota,38B6V@33154|Opisthokonta,3P119@4751|Fungi,3UZR5@5204|Basidiomycota,3VCZ7@5234|Tremellales	4751|Fungi	E	Creatinase/Prolidase N-terminal domain	-	-	3.4.11.9	ko:K01262	-	-	-	-	ko00000,ko01000,ko01002	-	-	-	Creatinase_N,Creatinase_N_2,Peptidase_M24,Peptidase_M24_C	IPR036005	Creatinase/aminopeptidase-like	0	0	0	0	0	0	0	0	0	0	0	0	0	0	0	0	0	0	0	0	0	0	0	0	0	0	0
OG0016397	82508.K1VCS3	0	869	COG0006@1|root,KOG2413@2759|Eukaryota,38B6V@33154|Opisthokonta,3P119@4751|Fungi,3UZR5@5204|Basidiomycota,3VCZ7@5234|Tremellales	4751|Fungi	E	Creatinase/Prolidase N-terminal domain	-	-	3.4.11.9	ko:K01262	-	-	-	-	ko00000,ko01000,ko01002	-	-	-	Creatinase_N,Creatinase_N_2,Peptidase_M24,Peptidase_M24_C	IPR029149	Creatinase/Aminopeptidase P/Spt16, N-terminal	0	0	0	0	0	0	0	0	0	0	0	0	0	0	0	0	0	0	0	0	0	0	0	0	0	0	0
OG0016397	82508.K1VCS3	0	869	COG0006@1|root,KOG2413@2759|Eukaryota,38B6V@33154|Opisthokonta,3P119@4751|Fungi,3UZR5@5204|Basidiomycota,3VCZ7@5234|Tremellales	4751|Fungi	E	Creatinase/Prolidase N-terminal domain	-	-	3.4.11.9	ko:K01262	-	-	-	-	ko00000,ko01000,ko01002	-	-	-	Creatinase_N,Creatinase_N_2,Peptidase_M24,Peptidase_M24_C	IPR050422	Xaa-Pro aminopeptidase P	0	0	0	0	0	0	0	0	0	0	0	0	0	0	0	0	0	0	0	0	0	0	0	0	0	0	0
OG0017431	430998.XP_007677788.1	7.62e-32	126	COG1404@1|root,KOG3525@2759|Eukaryota,38C1N@33154|Opisthokonta,3NV4P@4751|Fungi,3QNAI@4890|Ascomycota,1ZZ0C@147541|Dothideomycetes,3MFWF@451867|Dothideomycetidae	4751|Fungi	O	Belongs to the peptidase S8 family	KEX2	GO:0000139,GO:0000322,GO:0000323,GO:0000324,GO:0003674,GO:0003824,GO:0004175,GO:0004252,GO:0004857,GO:0004866,GO:0004867,GO:0005488,GO:0005515,GO:0005575,GO:0005622,GO:0005623,GO:0005737,GO:0005773,GO:0005794,GO:0005802,GO:0006508,GO:0006807,GO:0007323,GO:0008150,GO:0008152,GO:0008233,GO:0008236,GO:0009892,GO:0009986,GO:0010466,GO:0010467,GO:0010605,GO:0010951,GO:0012505,GO:0016020,GO:0016485,GO:…	3.4.21.61	ko:K01341	-	-	-	-	ko00000,ko01000,ko01002,ko03110	-	-	-	P_proprotein,Peptidase_S8			0	0	0	0	0	0	0	0	0	0	1	1	0	0	0	0	0	0	0	0	0	0	0	0	0	0	0
OG0017831	84751.XP_007877016.1	8.51e-06	53.5	COG5077@1|root,KOG1863@2759|Eukaryota,39PGC@33154|Opisthokonta,3NVJH@4751|Fungi,3UZHT@5204|Basidiomycota,3N4YT@452284|Ustilaginomycotina	4751|Fungi	O	A repeated domain in UCH-protein	UBP2	GO:0003674,GO:0003824,GO:0004843,GO:0005575,GO:0005622,GO:0005623,GO:0005737,GO:0006464,GO:0006508,GO:0006511,GO:0006807,GO:0006950,GO:0006979,GO:0008150,GO:0008152,GO:0008233,GO:0008234,GO:0009056,GO:0009057,GO:0009987,GO:0010992,GO:0016579,GO:0016787,GO:0019538,GO:0019725,GO:0019783,GO:0019941,GO:0030163,GO:0033554,GO:0034599,GO:0036211,GO:0036459,GO:0042221,GO:0042592,GO:0043162,GO:0043170,GO:…	3.4.19.12	ko:K11849	ko04657,map04657	-	-	-	ko00000,ko00001,ko01000,ko01002,ko04121	-	-	-	RPT,UCH	IPR038765	Papain-like cysteine peptidase superfamily	0	0	0	0	0	0	0	0	0	0	0	0	0	1	0	1	0	0	0	0	0	0	0	0	0	0	0
OG0017839	84751.XP_007882239.1	0.000198	54.3	COG5155@1|root,KOG1849@2759|Eukaryota,39UH7@33154|Opisthokonta,3NYNA@4751|Fungi,3UY76@5204|Basidiomycota,3MZYR@452284|Ustilaginomycotina	4751|Fungi	D	Peptidase family C50	ESP1	GO:0000003,GO:0000070,GO:0000278,GO:0000280,GO:0000819,GO:0003674,GO:0003824,GO:0004175,GO:0004197,GO:0005575,GO:0005622,GO:0005623,GO:0005634,GO:0005737,GO:0005739,GO:0005815,GO:0005816,GO:0005819,GO:0005856,GO:0006508,GO:0006807,GO:0006915,GO:0006950,GO:0006974,GO:0006996,GO:0007049,GO:0007059,GO:0007088,GO:0007096,GO:0007346,GO:0008150,GO:0008152,GO:0008219,GO:0008233,GO:0008234,GO:0009892,GO:…	3.4.22.49	ko:K02365	ko04110,ko04111,ko04113,ko04114,map04110,map04111,map04113,map04114	-	-	-	ko00000,ko00001,ko01000,ko01002,ko03036	-	-	-	Peptidase_C50			0	0	0	0	0	0	0	0	0	0	0	0	0	1	0	1	0	0	0	0	0	0	0	0	0	0	0
OG0017906	51453.EGR47517	3.06e-12	72.4	KOG1868@1|root,KOG1868@2759|Eukaryota,38DC9@33154|Opisthokonta,3NX9E@4751|Fungi,3QJJK@4890|Ascomycota,218MQ@147550|Sordariomycetes,3TCQY@5125|Hypocreales,3U1SW@5129|Hypocreaceae	4751|Fungi	O	Rhodanese Homology Domain	DOA4	GO:0000131,GO:0000502,GO:0002039,GO:0003674,GO:0003824,GO:0004175,GO:0004197,GO:0004843,GO:0005488,GO:0005515,GO:0005575,GO:0005622,GO:0005623,GO:0005634,GO:0005654,GO:0005737,GO:0005739,GO:0005768,GO:0005829,GO:0005933,GO:0005935,GO:0006139,GO:0006259,GO:0006275,GO:0006281,GO:0006283,GO:0006289,GO:0006325,GO:0006355,GO:0006464,GO:0006508,GO:0006511,GO:0006725,GO:0006807,GO:0006810,GO:0006811,GO:…	3.4.19.12	ko:K11839	ko04137,ko04144,ko04934,map04137,map04144,map04934	-	-	-	ko00000,ko00001,ko01000,ko01002,ko04121,ko04131	-	-	-	Rhodanese,UCH,USP8_dimer	IPR036873	Rhodanese-like domain superfamily	0	0	0	0	0	0	0	0	0	0	0	0	0	0	1	0	1	0	0	0	0	0	0	0	0	0	0
OG0018281	4909.A0A099NWI8	5.81e-288	821	COG0339@1|root,KOG2090@2759|Eukaryota,38FWV@33154|Opisthokonta,3NU5K@4751|Fungi,3QJCC@4890|Ascomycota,3RRWA@4891|Saccharomycetes	4751|Fungi	O	Cleaves proteins, imported into the mitochondrion, to their mature size. While most mitochondrial precursor proteins are processed to the mature form in one step by mitochondrial processing peptidase (MPP), the sequential cleavage by MIP of an octapeptide after initial processing by MPP is a required step for a subgroup of nuclear-encoded precursor proteins destined for the matrix or the inner me…	OCT1	GO:0003674,GO:0003824,GO:0004175,GO:0004222,GO:0005575,GO:0005622,GO:0005623,GO:0005737,GO:0005739,GO:0005759,GO:0006508,GO:0006518,GO:0006605,GO:0006626,GO:0006627,GO:0006807,GO:0006810,GO:0006839,GO:0006873,GO:0006875,GO:0006879,GO:0006886,GO:0006996,GO:0007005,GO:0008104,GO:0008150,GO:0008152,GO:0008233,GO:0008237,GO:0009987,GO:0010467,GO:0015031,GO:0015833,GO:0016043,GO:0016485,GO:0016787,GO:…	3.4.24.59	ko:K01410	-	-	-	-	ko00000,ko01000,ko01002,ko03029	-	-	-	Peptidase_M3			0	0	0	0	0	0	0	0	0	0	0	0	0	0	0	0	0	0	0	0	0	0	0	0	0	0	0
OG0018293	4909.A0A099P1Q3	1.2e-199	586	KOG0126@1|root,KOG1868@1|root,KOG0126@2759|Eukaryota,KOG1868@2759|Eukaryota,38DC9@33154|Opisthokonta,3NX9E@4751|Fungi,3QJJK@4890|Ascomycota,3RTEX@4891|Saccharomycetes	4751|Fungi	O	Belongs to the peptidase C19 family	DOA4	GO:0000131,GO:0000502,GO:0002039,GO:0003674,GO:0003824,GO:0004175,GO:0004197,GO:0004843,GO:0005488,GO:0005515,GO:0005575,GO:0005622,GO:0005623,GO:0005634,GO:0005654,GO:0005737,GO:0005739,GO:0005768,GO:0005829,GO:0005933,GO:0005935,GO:0006139,GO:0006259,GO:0006275,GO:0006281,GO:0006283,GO:0006289,GO:0006325,GO:0006355,GO:0006464,GO:0006508,GO:0006511,GO:0006725,GO:0006807,GO:0006810,GO:0006811,GO:…	3.4.19.12	ko:K11839	ko04137,ko04144,ko04934,map04137,map04144,map04934	-	-	-	ko00000,ko00001,ko01000,ko01002,ko04121,ko04131	-	-	-	Rhodanese,UCH,USP8_dimer			0	0	0	0	0	0	0	0	0	0	0	0	0	0	0	0	0	0	0	0	0	0	0	0	0	0	0
OG0018369	4909.A0A099P8Z7	6.52e-93	290	KOG1868@1|root,KOG1868@2759|Eukaryota,38FA8@33154|Opisthokonta,3NXZ3@4751|Fungi,3QPJH@4890|Ascomycota,3RT41@4891|Saccharomycetes	4751|Fungi	O	Belongs to the peptidase C19 family	-	GO:0003674,GO:0003824,GO:0004843,GO:0005575,GO:0005622,GO:0005623,GO:0005737,GO:0006464,GO:0006508,GO:0006807,GO:0008150,GO:0008152,GO:0008233,GO:0008234,GO:0009987,GO:0016579,GO:0016787,GO:0019538,GO:0019783,GO:0036211,GO:0036459,GO:0043170,GO:0043412,GO:0044237,GO:0044238,GO:0044260,GO:0044267,GO:0044424,GO:0044464,GO:0070011,GO:0070646,GO:0070647,GO:0071704,GO:0101005,GO:0140096,GO:1901564	3.4.19.12	ko:K11871	-	-	-	-	ko00000,ko01000,ko01002,ko04121	-	-	-	UCH	IPR038765	Papain-like cysteine peptidase superfamily	0	0	0	0	0	0	0	0	0	0	0	0	0	0	0	0	0	0	0	0	0	0	0	0	0	0	0
OG0018369	4909.A0A099P8Z7	6.52e-93	290	KOG1868@1|root,KOG1868@2759|Eukaryota,38FA8@33154|Opisthokonta,3NXZ3@4751|Fungi,3QPJH@4890|Ascomycota,3RT41@4891|Saccharomycetes	4751|Fungi	O	Belongs to the peptidase C19 family	-	GO:0003674,GO:0003824,GO:0004843,GO:0005575,GO:0005622,GO:0005623,GO:0005737,GO:0006464,GO:0006508,GO:0006807,GO:0008150,GO:0008152,GO:0008233,GO:0008234,GO:0009987,GO:0016579,GO:0016787,GO:0019538,GO:0019783,GO:0036211,GO:0036459,GO:0043170,GO:0043412,GO:0044237,GO:0044238,GO:0044260,GO:0044267,GO:0044424,GO:0044464,GO:0070011,GO:0070646,GO:0070647,GO:0071704,GO:0101005,GO:0140096,GO:1901564	3.4.19.12	ko:K11871	-	-	-	-	ko00000,ko01000,ko01002,ko04121	-	-	-	UCH	IPR050164	Ubiquitin carboxyl-terminal hydrolases	0	0	0	0	0	0	0	0	0	0	0	0	0	0	0	0	0	0	0	0	0	0	0	0	0	0	0
OG0018818	4909.A0A099P8Z7	7.83e-110	342	KOG1868@1|root,KOG1868@2759|Eukaryota,38FA8@33154|Opisthokonta,3NXZ3@4751|Fungi,3QPJH@4890|Ascomycota,3RT41@4891|Saccharomycetes	4751|Fungi	O	Belongs to the peptidase C19 family	-	GO:0003674,GO:0003824,GO:0004843,GO:0005575,GO:0005622,GO:0005623,GO:0005737,GO:0006464,GO:0006508,GO:0006807,GO:0008150,GO:0008152,GO:0008233,GO:0008234,GO:0009987,GO:0016579,GO:0016787,GO:0019538,GO:0019783,GO:0036211,GO:0036459,GO:0043170,GO:0043412,GO:0044237,GO:0044238,GO:0044260,GO:0044267,GO:0044424,GO:0044464,GO:0070011,GO:0070646,GO:0070647,GO:0071704,GO:0101005,GO:0140096,GO:1901564	3.4.19.12	ko:K11871	-	-	-	-	ko00000,ko01000,ko01002,ko04121	-	-	-	UCH			0	0	0	0	0	0	0	0	0	0	0	0	0	0	0	0	0	0	0	0	0	0	0	0	0	0	0
OG0018860	4909.A0A099P550	2.31e-99	308	COG2260@1|root,KOG3675@1|root,KOG3503@2759|Eukaryota,KOG3675@2759|Eukaryota,38E6G@33154|Opisthokonta,3NWHP@4751|Fungi,3QMR7@4890|Ascomycota,3RT7K@4891|Saccharomycetes	4751|Fungi	O	Belongs to the peptidase M49 family	YOL057W	GO:0003674,GO:0003824,GO:0004177,GO:0005575,GO:0005622,GO:0005623,GO:0005634,GO:0005737,GO:0006508,GO:0006807,GO:0008150,GO:0008152,GO:0008233,GO:0008238,GO:0008239,GO:0016787,GO:0019538,GO:0043170,GO:0043226,GO:0043227,GO:0043229,GO:0043231,GO:0044238,GO:0044424,GO:0044464,GO:0070011,GO:0071704,GO:0140096,GO:1901564	3.4.14.4	ko:K01277	-	-	-	-	ko00000,ko01000,ko01002	-	-	-	Peptidase_M49	IPR039461	Peptidase family M49	0	0	0	0	0	0	0	0	0	0	0	0	0	0	0	0	0	0	0	0	0	0	0	0	0	0	0
OG0018965	4909.A0A099NY23	4.34e-85	275	COG0466@1|root,KOG2004@2759|Eukaryota,38E0Y@33154|Opisthokonta,3NUKI@4751|Fungi,3QMDE@4890|Ascomycota,3RSKE@4891|Saccharomycetes	4751|Fungi	O	ATP-dependent serine protease that mediates the selective degradation of misfolded and unassembled polypeptides in the peroxisomal matrix. Necessary for type 2 peroxisome targeting signal (PTS2)-containing protein processing and facilitates peroxisome matrix protein import	-	GO:0005575,GO:0005622,GO:0005623,GO:0005737,GO:0005777,GO:0005782,GO:0006508,GO:0006605,GO:0006625,GO:0006807,GO:0006810,GO:0006886,GO:0006996,GO:0007031,GO:0008104,GO:0008150,GO:0008152,GO:0009987,GO:0010467,GO:0015031,GO:0015833,GO:0016043,GO:0016485,GO:0019538,GO:0031907,GO:0031974,GO:0033036,GO:0033365,GO:0034613,GO:0042579,GO:0042886,GO:0043170,GO:0043226,GO:0043227,GO:0043229,GO:0043231,GO:…	3.4.21.53	ko:K01338	ko04112,map04112	-	-	-	ko00000,ko00001,ko01000,ko01002	-	-	-	AAA,LON_substr_bdg,Lon_C			0	0	0	0	0	0	0	0	0	0	0	0	0	0	0	0	0	0	0	0	0	0	0	0	0	0	0
OG0019284	263815.XP_007874215.1	0.000201	47.8	COG0501@1|root,KOG2719@2759|Eukaryota,38C73@33154|Opisthokonta,3NUIC@4751|Fungi,3QK2T@4890|Ascomycota,3MC1D@451866|Taphrinomycotina	4751|Fungi	O	CAAX prenyl protease N-terminal, five membrane helices	STE24	GO:0003674,GO:0003824,GO:0004175,GO:0004222,GO:0005575,GO:0005622,GO:0005623,GO:0005634,GO:0005635,GO:0005637,GO:0005737,GO:0005739,GO:0005740,GO:0005741,GO:0005783,GO:0005789,GO:0006508,GO:0006807,GO:0007323,GO:0008150,GO:0008152,GO:0008233,GO:0008237,GO:0009987,GO:0010467,GO:0012505,GO:0016020,GO:0016021,GO:0016485,GO:0016787,GO:0019538,GO:0019866,GO:0019867,GO:0030176,GO:0031090,GO:0031136,GO:…	3.4.24.84	ko:K06013	ko00900,ko01130,map00900,map01130	-	R09845	RC00141	ko00000,ko00001,ko01000,ko01002,ko04147	-	-	-	Peptidase_M48,Peptidase_M48_N			0	0	0	0	0	0	0	0	0	0	0	0	0	0	0	0	0	0	0	0	0	0	0	0	0	0	0
OG0019406	5551.XP_003235282.1	2.38e-27	108	COG1404@1|root,KOG1153@2759|Eukaryota,38H6S@33154|Opisthokonta,3NUCW@4751|Fungi,3QK5M@4890|Ascomycota,20CB5@147545|Eurotiomycetes,3B01S@33183|Onygenales,3FVPM@34384|Arthrodermataceae	4751|Fungi	O	Secreted subtilisin-like serine protease with keratinolytic activity that contributes to pathogenicity	PRB1	GO:0000003,GO:0000322,GO:0000323,GO:0000324,GO:0000328,GO:0000746,GO:0000747,GO:0003674,GO:0003824,GO:0004175,GO:0004252,GO:0005488,GO:0005575,GO:0005622,GO:0005623,GO:0005737,GO:0005773,GO:0005775,GO:0005783,GO:0006508,GO:0006807,GO:0006914,GO:0006950,GO:0006996,GO:0007033,GO:0007039,GO:0007154,GO:0008150,GO:0008152,GO:0008233,GO:0008236,GO:0009056,GO:0009057,GO:0009267,GO:0009605,GO:0009653,GO:…	3.4.21.48	ko:K01336	ko04138,map04138	-	-	-	ko00000,ko00001,ko01000,ko01002,ko03110	-	-	-	Inhibitor_I9,Peptidase_S8			0	0	0	0	0	0	0	0	0	0	0	0	0	0	0	0	0	0	0	0	0	0	0	0	0	0	0
[truncated: 30 more columns]

## Sheet: Supplementary table 3 - Carbohy
Orthogroup	seed ortholog	evalue	score	eggNOG OGs	max annot lvl	COG category	Description	Preferred name	GOs	EC	KEGG ko	KEGG Pathway	KEGG Module	KEGG Reaction	KEGG rclass	BRITE	KEGG TC	CAZy	BiGG Reaction	PFAMs	IPR term	IPR description	Blastocladiella emersonii 22665	Candida dubliniensis 11945	Candida dubliniensis 2747	Candida dubliniensis 8501	Candida parapsilosis 11301	Candida parapsilosis 1954	Candida tropicalis 94	Epidermophyton floccosum 100148	Epidermophyton floccosum 10867	Epidermophyton floccosum 130802	Hortaea werneckii 100455	Hortaea werneckii 1163	Hortaea werneckii 41051	Malassezia furfur 14140-1	Malassezia furfur 14140-2	Malassezia furfur 1878	Malassezia furfur 6000	Malassezia globosa 7705	Malassezia globosa 7886	Malassezia globosa 8744	Malassezia restricta 7877	Malassezia restricta 7991	Microsporum audouinii 119449	Microsporum audouinii 33268	Microsporum canis 113480	Microsporum canis 15669	Microsporum canis 44551
OG0000027	84751.XP_007881884.1	7.29e-305	909	COG1215@1|root,KOG2571@2759|Eukaryota,38FKQ@33154|Opisthokonta,3NUPC@4751|Fungi,3UYB7@5204|Basidiomycota,3N382@452284|Ustilaginomycotina	4751|Fungi	M	Chitin synthase	-	GO:0005575,GO:0005622,GO:0005623,GO:0005737,GO:0005886,GO:0012506,GO:0016020,GO:0030659,GO:0031090,GO:0031410,GO:0031982,GO:0043226,GO:0043227,GO:0043229,GO:0044422,GO:0044424,GO:0044433,GO:0044444,GO:0044446,GO:0044464,GO:0071944,GO:0097708	2.4.1.16	ko:K00698	ko00520,map00520	-	R02335	RC00005	ko00000,ko00001,ko01000,ko01003	-	GT2	-	Chitin_synth_1,Chitin_synth_1N	IPR036028	SH3-like domain superfamily	2	2	3	3	3	3	3	4	3	3	6	3	6	3	3	5	5	2	2	2	2	2	3	3	3	3	3
OG0000027	84751.XP_007881884.1	7.29e-305	909	COG1215@1|root,KOG2571@2759|Eukaryota,38FKQ@33154|Opisthokonta,3NUPC@4751|Fungi,3UYB7@5204|Basidiomycota,3N382@452284|Ustilaginomycotina	4751|Fungi	M	Chitin synthase	-	GO:0005575,GO:0005622,GO:0005623,GO:0005737,GO:0005886,GO:0012506,GO:0016020,GO:0030659,GO:0031090,GO:0031410,GO:0031982,GO:0043226,GO:0043227,GO:0043229,GO:0044422,GO:0044424,GO:0044433,GO:0044444,GO:0044446,GO:0044464,GO:0071944,GO:0097708	2.4.1.16	ko:K00698	ko00520,map00520	-	R02335	RC00005	ko00000,ko00001,ko01000,ko01003	-	GT2	-	Chitin_synth_1,Chitin_synth_1N	IPR029044	Nucleotide-diphospho-sugar transferases	2	2	3	3	3	3	3	4	3	3	6	3	6	3	3	5	5	2	2	2	2	2	3	3	3	3	3
OG0000027	84751.XP_007881884.1	7.29e-305	909	COG1215@1|root,KOG2571@2759|Eukaryota,38FKQ@33154|Opisthokonta,3NUPC@4751|Fungi,3UYB7@5204|Basidiomycota,3N382@452284|Ustilaginomycotina	4751|Fungi	M	Chitin synthase	-	GO:0005575,GO:0005622,GO:0005623,GO:0005737,GO:0005886,GO:0012506,GO:0016020,GO:0030659,GO:0031090,GO:0031410,GO:0031982,GO:0043226,GO:0043227,GO:0043229,GO:0044422,GO:0044424,GO:0044433,GO:0044444,GO:0044446,GO:0044464,GO:0071944,GO:0097708	2.4.1.16	ko:K00698	ko00520,map00520	-	R02335	RC00005	ko00000,ko00001,ko01000,ko01003	-	GT2	-	Chitin_synth_1,Chitin_synth_1N	IPR036028	SH3-like domain superfamily	2	2	3	3	3	3	3	4	3	3	6	3	6	3	3	5	5	2	2	2	2	2	3	3	3	3	3
OG0000027	84751.XP_007881884.1	7.29e-305	909	COG1215@1|root,KOG2571@2759|Eukaryota,38FKQ@33154|Opisthokonta,3NUPC@4751|Fungi,3UYB7@5204|Basidiomycota,3N382@452284|Ustilaginomycotina	4751|Fungi	M	Chitin synthase	-	GO:0005575,GO:0005622,GO:0005623,GO:0005737,GO:0005886,GO:0012506,GO:0016020,GO:0030659,GO:0031090,GO:0031410,GO:0031982,GO:0043226,GO:0043227,GO:0043229,GO:0044422,GO:0044424,GO:0044433,GO:0044444,GO:0044446,GO:0044464,GO:0071944,GO:0097708	2.4.1.16	ko:K00698	ko00520,map00520	-	R02335	RC00005	ko00000,ko00001,ko01000,ko01003	-	GT2	-	Chitin_synth_1,Chitin_synth_1N	IPR011992	EF-hand domain pair	2	2	3	3	3	3	3	4	3	3	6	3	6	3	3	5	5	2	2	2	2	2	3	3	3	3	3
OG0000027	84751.XP_007881884.1	7.29e-305	909	COG1215@1|root,KOG2571@2759|Eukaryota,38FKQ@33154|Opisthokonta,3NUPC@4751|Fungi,3UYB7@5204|Basidiomycota,3N382@452284|Ustilaginomycotina	4751|Fungi	M	Chitin synthase	-	GO:0005575,GO:0005622,GO:0005623,GO:0005737,GO:0005886,GO:0012506,GO:0016020,GO:0030659,GO:0031090,GO:0031410,GO:0031982,GO:0043226,GO:0043227,GO:0043229,GO:0044422,GO:0044424,GO:0044433,GO:0044444,GO:0044446,GO:0044464,GO:0071944,GO:0097708	2.4.1.16	ko:K00698	ko00520,map00520	-	R02335	RC00005	ko00000,ko00001,ko01000,ko01003	-	GT2	-	Chitin_synth_1,Chitin_synth_1N	IPR004835	Chitin synthase	2	2	3	3	3	3	3	4	3	3	6	3	6	3	3	5	5	2	2	2	2	2	3	3	3	3	3
OG0000077	84751.XP_007878116.1	4.03e-210	618	COG5020@1|root,KOG4472@2759|Eukaryota,38CI7@33154|Opisthokonta,3NUKP@4751|Fungi,3UZ64@5204|Basidiomycota,3N320@452284|Ustilaginomycotina	4751|Fungi	G	Glycolipid 2-alpha-mannosyltransferase	-	-	-	ko:K10967	ko00514,map00514	-	R09300,R09301	-	ko00000,ko00001,ko01000,ko01003	-	GT15	-	Glyco_transf_15	IPR029044	Nucleotide-diphospho-sugar transferases	0	2	2	2	3	2	6	2	2	3	6	3	8	3	3	3	3	2	1	2	1	1	1	1	2	2	1
OG0000077	84751.XP_007878116.1	4.03e-210	618	COG5020@1|root,KOG4472@2759|Eukaryota,38CI7@33154|Opisthokonta,3NUKP@4751|Fungi,3UZ64@5204|Basidiomycota,3N320@452284|Ustilaginomycotina	4751|Fungi	G	Glycolipid 2-alpha-mannosyltransferase	-	-	-	ko:K10967	ko00514,map00514	-	R09300,R09301	-	ko00000,ko00001,ko01000,ko01003	-	GT15	-	Glyco_transf_15	IPR002685	Glycosyl transferase, family 15	0	2	2	2	3	2	6	2	2	3	6	3	8	3	3	3	3	2	1	2	1	1	1	1	2	2	1
OG0000122	430998.XP_007677433.1	1.2e-172	517	2CYIJ@1|root,2S4MX@2759|Eukaryota,3A7PU@33154|Opisthokonta,3P4AW@4751|Fungi,3QQCT@4890|Ascomycota,2062C@147541|Dothideomycetes,3MPE7@451867|Dothideomycetidae	4751|Fungi	H	Glycosyltransferase family 71 protein	-	-	-	ko:K05535	ko00513,ko01100,map00513,map01100	M00074	-	-	ko00000,ko00001,ko00002,ko01000,ko01003	-	GT71	-	Mannosyl_trans3	IPR029044	Nucleotide-diphospho-sugar transferases	0	6	5	6	4	4	6	2	2	2	1	1	2	0	0	0	0	0	0	0	0	0	2	2	2	2	2
OG0000126	430998.XP_007672700.1	7.38e-296	866	KOG2204@1|root,KOG2431@1|root,KOG2204@2759|Eukaryota,KOG2431@2759|Eukaryota,38B69@33154|Opisthokonta,3NXK1@4751|Fungi,3QK11@4890|Ascomycota,1ZYFE@147541|Dothideomycetes,3MGPX@451867|Dothideomycetidae	4751|Fungi	G	Belongs to the glycosyl hydrolase 47 family	-	GO:0000139,GO:0003674,GO:0003824,GO:0004553,GO:0004559,GO:0004571,GO:0005575,GO:0005622,GO:0005623,GO:0005737,GO:0005783,GO:0005794,GO:0006491,GO:0006508,GO:0006511,GO:0006807,GO:0006950,GO:0008150,GO:0008152,GO:0009056,GO:0009057,GO:0009100,GO:0009987,GO:0010033,GO:0010243,GO:0010498,GO:0012505,GO:0015923,GO:0015924,GO:0016020,GO:0016787,GO:0016798,GO:0019538,GO:0019941,GO:0030163,GO:0030433,GO:…	3.2.1.113	ko:K01230	ko00510,ko00513,ko01100,ko04141,map00510,map00513,map01100,map04141	M00073,M00074	R05982,R06722	-	ko00000,ko00001,ko00002,ko01000,ko04131	-	GH47	-	Glyco_hydro_47	IPR050749	Glycosyl Hydrolase Family 47	0	0	0	0	0	0	0	3	3	3	8	4	8	1	1	1	1	1	1	1	1	1	3	3	3	3	4
OG0000126	430998.XP_007672700.1	7.38e-296	866	KOG2204@1|root,KOG2431@1|root,KOG2204@2759|Eukaryota,KOG2431@2759|Eukaryota,38B69@33154|Opisthokonta,3NXK1@4751|Fungi,3QK11@4890|Ascomycota,1ZYFE@147541|Dothideomycetes,3MGPX@451867|Dothideomycetidae	4751|Fungi	G	Belongs to the glycosyl hydrolase 47 family	-	GO:0000139,GO:0003674,GO:0003824,GO:0004553,GO:0004559,GO:0004571,GO:0005575,GO:0005622,GO:0005623,GO:0005737,GO:0005783,GO:0005794,GO:0006491,GO:0006508,GO:0006511,GO:0006807,GO:0006950,GO:0008150,GO:0008152,GO:0009056,GO:0009057,GO:0009100,GO:0009987,GO:0010033,GO:0010243,GO:0010498,GO:0012505,GO:0015923,GO:0015924,GO:0016020,GO:0016787,GO:0016798,GO:0019538,GO:0019941,GO:0030163,GO:0030433,GO:…	3.2.1.113	ko:K01230	ko00510,ko00513,ko01100,ko04141,map00510,map00513,map01100,map04141	M00073,M00074	R05982,R06722	-	ko00000,ko00001,ko00002,ko01000,ko04131	-	GH47	-	Glyco_hydro_47	IPR036026	Seven-hairpin glycosidases	0	0	0	0	0	0	0	3	3	3	8	4	8	1	1	1	1	1	1	1	1	1	3	3	3	3	4
OG0000140	120017.I2FXD6	1.06e-170	525	COG2273@1|root,2QR13@2759|Eukaryota,38E3H@33154|Opisthokonta,3NUWF@4751|Fungi,3V3IN@5204|Basidiomycota	4751|Fungi	G	Beta-glucan synthesis-associated protein (SKN1)	KRE6	GO:0000271,GO:0003674,GO:0003824,GO:0004553,GO:0005575,GO:0005622,GO:0005623,GO:0005737,GO:0005783,GO:0005789,GO:0005886,GO:0005933,GO:0005935,GO:0005975,GO:0005976,GO:0006073,GO:0006077,GO:0006078,GO:0006629,GO:0006643,GO:0006665,GO:0006807,GO:0008150,GO:0008152,GO:0008610,GO:0009058,GO:0009059,GO:0009250,GO:0009987,GO:0012505,GO:0015926,GO:0016020,GO:0016021,GO:0016043,GO:0016051,GO:0016787,GO:…	-	ko:K21850	-	-	-	-	ko00000,ko04131	-	GH16	-	SKN1	IPR016024	Armadillo-type fold	2	2	1	2	2	2	2	2	2	2	4	2	3	2	2	3	3	2	2	2	1	2	2	2	2	2	2
OG0000140	120017.I2FXD6	1.06e-170	525	COG2273@1|root,2QR13@2759|Eukaryota,38E3H@33154|Opisthokonta,3NUWF@4751|Fungi,3V3IN@5204|Basidiomycota	4751|Fungi	G	Beta-glucan synthesis-associated protein (SKN1)	KRE6	GO:0000271,GO:0003674,GO:0003824,GO:0004553,GO:0005575,GO:0005622,GO:0005623,GO:0005737,GO:0005783,GO:0005789,GO:0005886,GO:0005933,GO:0005935,GO:0005975,GO:0005976,GO:0006073,GO:0006077,GO:0006078,GO:0006629,GO:0006643,GO:0006665,GO:0006807,GO:0008150,GO:0008152,GO:0008610,GO:0009058,GO:0009059,GO:0009250,GO:0009987,GO:0012505,GO:0015926,GO:0016020,GO:0016021,GO:0016043,GO:0016051,GO:0016787,GO:…	-	ko:K21850	-	-	-	-	ko00000,ko04131	-	GH16	-	SKN1	IPR013320	Concanavalin A-like lectin/glucanase domain superfamily	2	2	1	2	2	2	2	2	2	2	4	2	3	2	2	3	3	2	2	2	1	2	2	2	2	2	2
OG0000140	120017.I2FXD6	1.06e-170	525	COG2273@1|root,2QR13@2759|Eukaryota,38E3H@33154|Opisthokonta,3NUWF@4751|Fungi,3V3IN@5204|Basidiomycota	4751|Fungi	G	Beta-glucan synthesis-associated protein (SKN1)	KRE6	GO:0000271,GO:0003674,GO:0003824,GO:0004553,GO:0005575,GO:0005622,GO:0005623,GO:0005737,GO:0005783,GO:0005789,GO:0005886,GO:0005933,GO:0005935,GO:0005975,GO:0005976,GO:0006073,GO:0006077,GO:0006078,GO:0006629,GO:0006643,GO:0006665,GO:0006807,GO:0008150,GO:0008152,GO:0008610,GO:0009058,GO:0009059,GO:0009250,GO:0009987,GO:0012505,GO:0015926,GO:0016020,GO:0016021,GO:0016043,GO:0016051,GO:0016787,GO:…	-	ko:K21850	-	-	-	-	ko00000,ko04131	-	GH16	-	SKN1	IPR026739	AP complex subunit beta	2	2	1	2	2	2	2	2	2	2	4	2	3	2	2	3	3	2	2	2	1	2	2	2	2	2	2
OG0000144	63405.XP_002849366.1	0	1914	COG3325@1|root,COG5640@1|root,KOG2806@2759|Eukaryota,KOG3627@2759|Eukaryota,38BJK@33154|Opisthokonta,3Q30P@4751|Fungi,3RK2F@4890|Ascomycota,20TGC@147545|Eurotiomycetes,3B4E7@33183|Onygenales,3FVYD@34384|Arthrodermataceae	4751|Fungi	G	Glyco_18	-	-	3.2.1.14	ko:K01183	ko00520,ko01100,map00520,map01100	-	R01206,R02334	RC00467	ko00000,ko00001,ko01000	-	GH18	-	Glyco_hydro_18	IPR050314	Glycosyl Hydrolase Family 18	0	0	0	0	0	0	0	1	4	4	0	1	1	0	0	0	0	0	0	0	0	0	9	9	8	8	9
OG0000144	63405.XP_002849366.1	0	1914	COG3325@1|root,COG5640@1|root,KOG2806@2759|Eukaryota,KOG3627@2759|Eukaryota,38BJK@33154|Opisthokonta,3Q30P@4751|Fungi,3RK2F@4890|Ascomycota,20TGC@147545|Eurotiomycetes,3B4E7@33183|Onygenales,3FVYD@34384|Arthrodermataceae	4751|Fungi	G	Glyco_18	-	-	3.2.1.14	ko:K01183	ko00520,ko01100,map00520,map01100	-	R01206,R02334	RC00467	ko00000,ko00001,ko01000	-	GH18	-	Glyco_hydro_18	IPR029070	Chitinase insertion domain superfamily	0	0	0	0	0	0	0	1	4	4	0	1	1	0	0	0	0	0	0	0	0	0	9	9	8	8	9
OG0000144	63405.XP_002849366.1	0	1914	COG3325@1|root,COG5640@1|root,KOG2806@2759|Eukaryota,KOG3627@2759|Eukaryota,38BJK@33154|Opisthokonta,3Q30P@4751|Fungi,3RK2F@4890|Ascomycota,20TGC@147545|Eurotiomycetes,3B4E7@33183|Onygenales,3FVYD@34384|Arthrodermataceae	4751|Fungi	G	Glyco_18	-	-	3.2.1.14	ko:K01183	ko00520,ko01100,map00520,map01100	-	R01206,R02334	RC00467	ko00000,ko00001,ko01000	-	GH18	-	Glyco_hydro_18	IPR017853	Glycoside hydrolase superfamily	0	0	0	0	0	0	0	1	4	4	0	1	1	0	0	0	0	0	0	0	0	0	9	9	8	8	9
OG0000160	72558.CBQ70856	1.43e-164	503	COG2273@1|root,2QR13@2759|Eukaryota,38E3H@33154|Opisthokonta,3NUWF@4751|Fungi,3V3IN@5204|Basidiomycota,3MYSW@452284|Ustilaginomycotina	4751|Fungi	G	Beta-glucan synthesis-associated protein (SKN1)	KRE6	GO:0000271,GO:0003674,GO:0003824,GO:0004553,GO:0005575,GO:0005622,GO:0005623,GO:0005737,GO:0005783,GO:0005789,GO:0005886,GO:0005933,GO:0005935,GO:0005975,GO:0005976,GO:0006073,GO:0006077,GO:0006078,GO:0006629,GO:0006643,GO:0006665,GO:0006807,GO:0008150,GO:0008152,GO:0008610,GO:0009058,GO:0009059,GO:0009250,GO:0009987,GO:0012505,GO:0015926,GO:0016020,GO:0016021,GO:0016043,GO:0016051,GO:0016787,GO:…	-	ko:K21850	-	-	-	-	ko00000,ko04131	-	GH16	-	SKN1	IPR036638	Helix-loop-helix DNA-binding domain superfamily	0	3	3	5	4	4	4	1	1	1	4	2	4	3	3	6	4	4	4	4	3	3	1	1	1	1	1
OG0000160	72558.CBQ70856	1.43e-164	503	COG2273@1|root,2QR13@2759|Eukaryota,38E3H@33154|Opisthokonta,3NUWF@4751|Fungi,3V3IN@5204|Basidiomycota,3MYSW@452284|Ustilaginomycotina	4751|Fungi	G	Beta-glucan synthesis-associated protein (SKN1)	KRE6	GO:0000271,GO:0003674,GO:0003824,GO:0004553,GO:0005575,GO:0005622,GO:0005623,GO:0005737,GO:0005783,GO:0005789,GO:0005886,GO:0005933,GO:0005935,GO:0005975,GO:0005976,GO:0006073,GO:0006077,GO:0006078,GO:0006629,GO:0006643,GO:0006665,GO:0006807,GO:0008150,GO:0008152,GO:0008610,GO:0009058,GO:0009059,GO:0009250,GO:0009987,GO:0012505,GO:0015926,GO:0016020,GO:0016021,GO:0016043,GO:0016051,GO:0016787,GO:…	-	ko:K21850	-	-	-	-	ko00000,ko04131	-	GH16	-	SKN1	IPR013320	Concanavalin A-like lectin/glucanase domain superfamily	0	3	3	5	4	4	4	1	1	1	4	2	4	3	3	6	4	4	4	4	3	3	1	1	1	1	1
OG0000160	72558.CBQ70856	1.43e-164	503	COG2273@1|root,2QR13@2759|Eukaryota,38E3H@33154|Opisthokonta,3NUWF@4751|Fungi,3V3IN@5204|Basidiomycota,3MYSW@452284|Ustilaginomycotina	4751|Fungi	G	Beta-glucan synthesis-associated protein (SKN1)	KRE6	GO:0000271,GO:0003674,GO:0003824,GO:0004553,GO:0005575,GO:0005622,GO:0005623,GO:0005737,GO:0005783,GO:0005789,GO:0005886,GO:0005933,GO:0005935,GO:0005975,GO:0005976,GO:0006073,GO:0006077,GO:0006078,GO:0006629,GO:0006643,GO:0006665,GO:0006807,GO:0008150,GO:0008152,GO:0008610,GO:0009058,GO:0009059,GO:0009250,GO:0009987,GO:0012505,GO:0015926,GO:0016020,GO:0016021,GO:0016043,GO:0016051,GO:0016787,GO:…	-	ko:K21850	-	-	-	-	ko00000,ko04131	-	GH16	-	SKN1	IPR005629	Beta-glucan synthesis-associated protein Skn1/Kre6/Sbg1	0	3	3	5	4	4	4	1	1	1	4	2	4	3	3	6	4	4	4	4	3	3	1	1	1	1	1
OG0000170	120017.I2FYB0	0	1752	COG1215@1|root,COG5022@1|root,KOG2571@2759|Eukaryota,KOG4229@2759|Eukaryota,38H3K@33154|Opisthokonta,3NU7V@4751|Fungi,3UYAW@5204|Basidiomycota,3MZG1@452284|Ustilaginomycotina	4751|Fungi	MN	Belongs to the TRAFAC class myosin-kinesin ATPase superfamily. Myosin family	-	GO:0005575,GO:0005622,GO:0005623,GO:0005737,GO:0005886,GO:0012506,GO:0016020,GO:0030659,GO:0031090,GO:0031410,GO:0031982,GO:0043226,GO:0043227,GO:0043229,GO:0044422,GO:0044424,GO:0044433,GO:0044444,GO:0044446,GO:0044464,GO:0071944,GO:0097708	2.4.1.16	ko:K00698	ko00520,map00520	-	R02335	RC00005	ko00000,ko00001,ko01000,ko01003	-	GT2	-	Chitin_synth_2,Cyt-b5,DEK_C,Myosin_head	IPR036236	Zinc finger C2H2 superfamily	6	0	0	0	0	0	0	2	2	2	4	2	4	2	2	4	4	2	2	2	2	2	2	2	2	2	2
OG0000170	120017.I2FYB0	0	1752	COG1215@1|root,COG5022@1|root,KOG2571@2759|Eukaryota,KOG4229@2759|Eukaryota,38H3K@33154|Opisthokonta,3NU7V@4751|Fungi,3UYAW@5204|Basidiomycota,3MZG1@452284|Ustilaginomycotina	4751|Fungi	MN	Belongs to the TRAFAC class myosin-kinesin ATPase superfamily. Myosin family	-	GO:0005575,GO:0005622,GO:0005623,GO:0005737,GO:0005886,GO:0012506,GO:0016020,GO:0030659,GO:0031090,GO:0031410,GO:0031982,GO:0043226,GO:0043227,GO:0043229,GO:0044422,GO:0044424,GO:0044433,GO:0044444,GO:0044446,GO:0044464,GO:0071944,GO:0097708	2.4.1.16	ko:K00698	ko00520,map00520	-	R02335	RC00005	ko00000,ko00001,ko01000,ko01003	-	GT2	-	Chitin_synth_2,Cyt-b5,DEK_C,Myosin_head	IPR036322	WD40-repeat-containing domain superfamily	6	0	0	0	0	0	0	2	2	2	4	2	4	2	2	4	4	2	2	2	2	2	2	2	2	2	2
OG0000170	120017.I2FYB0	0	1752	COG1215@1|root,COG5022@1|root,KOG2571@2759|Eukaryota,KOG4229@2759|Eukaryota,38H3K@33154|Opisthokonta,3NU7V@4751|Fungi,3UYAW@5204|Basidiomycota,3MZG1@452284|Ustilaginomycotina	4751|Fungi	MN	Belongs to the TRAFAC class myosin-kinesin ATPase superfamily. Myosin family	-	GO:0005575,GO:0005622,GO:0005623,GO:0005737,GO:0005886,GO:0012506,GO:0016020,GO:0030659,GO:0031090,GO:0031410,GO:0031982,GO:0043226,GO:0043227,GO:0043229,GO:0044422,GO:0044424,GO:0044433,GO:0044444,GO:0044446,GO:0044464,GO:0071944,GO:0097708	2.4.1.16	ko:K00698	ko00520,map00520	-	R02335	RC00005	ko00000,ko00001,ko01000,ko01003	-	GT2	-	Chitin_synth_2,Cyt-b5,DEK_C,Myosin_head	IPR004835	Chitin synthase	6	0	0	0	0	0	0	2	2	2	4	2	4	2	2	4	4	2	2	2	2	2	2	2	2	2	2
OG0000170	120017.I2FYB0	0	1752	COG1215@1|root,COG5022@1|root,KOG2571@2759|Eukaryota,KOG4229@2759|Eukaryota,38H3K@33154|Opisthokonta,3NU7V@4751|Fungi,3UYAW@5204|Basidiomycota,3MZG1@452284|Ustilaginomycotina	4751|Fungi	MN	Belongs to the TRAFAC class myosin-kinesin ATPase superfamily. Myosin family	-	GO:0005575,GO:0005622,GO:0005623,GO:0005737,GO:0005886,GO:0012506,GO:0016020,GO:0030659,GO:0031090,GO:0031410,GO:0031982,GO:0043226,GO:0043227,GO:0043229,GO:0044422,GO:0044424,GO:0044433,GO:0044444,GO:0044446,GO:0044464,GO:0071944,GO:0097708	2.4.1.16	ko:K00698	ko00520,map00520	-	R02335	RC00005	ko00000,ko00001,ko01000,ko01003	-	GT2	-	Chitin_synth_2,Cyt-b5,DEK_C,Myosin_head	IPR036400	Cytochrome b5-like heme/steroid binding domain superfamily	6	0	0	0	0	0	0	2	2	2	4	2	4	2	2	4	4	2	2	2	2	2	2	2	2	2	2
OG0000170	120017.I2FYB0	0	1752	COG1215@1|root,COG5022@1|root,KOG2571@2759|Eukaryota,KOG4229@2759|Eukaryota,38H3K@33154|Opisthokonta,3NU7V@4751|Fungi,3UYAW@5204|Basidiomycota,3MZG1@452284|Ustilaginomycotina	4751|Fungi	MN	Belongs to the TRAFAC class myosin-kinesin ATPase superfamily. Myosin family	-	GO:0005575,GO:0005622,GO:0005623,GO:0005737,GO:0005886,GO:0012506,GO:0016020,GO:0030659,GO:0031090,GO:0031410,GO:0031982,GO:0043226,GO:0043227,GO:0043229,GO:0044422,GO:0044424,GO:0044433,GO:0044444,GO:0044446,GO:0044464,GO:0071944,GO:0097708	2.4.1.16	ko:K00698	ko00520,map00520	-	R02335	RC00005	ko00000,ko00001,ko01000,ko01003	-	GT2	-	Chitin_synth_2,Cyt-b5,DEK_C,Myosin_head	IPR036236	Zinc finger C2H2 superfamily	6	0	0	0	0	0	0	2	2	2	4	2	4	2	2	4	4	2	2	2	2	2	2	2	2	2	2
OG0000170	120017.I2FYB0	0	1752	COG1215@1|root,COG5022@1|root,KOG2571@2759|Eukaryota,KOG4229@2759|Eukaryota,38H3K@33154|Opisthokonta,3NU7V@4751|Fungi,3UYAW@5204|Basidiomycota,3MZG1@452284|Ustilaginomycotina	4751|Fungi	MN	Belongs to the TRAFAC class myosin-kinesin ATPase superfamily. Myosin family	-	GO:0005575,GO:0005622,GO:0005623,GO:0005737,GO:0005886,GO:0012506,GO:0016020,GO:0030659,GO:0031090,GO:0031410,GO:0031982,GO:0043226,GO:0043227,GO:0043229,GO:0044422,GO:0044424,GO:0044433,GO:0044444,GO:0044446,GO:0044464,GO:0071944,GO:0097708	2.4.1.16	ko:K00698	ko00520,map00520	-	R02335	RC00005	ko00000,ko00001,ko01000,ko01003	-	GT2	-	Chitin_synth_2,Cyt-b5,DEK_C,Myosin_head	IPR027417	P-loop containing nucleoside triphosphate hydrolase	6	0	0	0	0	0	0	2	2	2	4	2	4	2	2	4	4	2	2	2	2	2	2	2	2	2	2
OG0000170	120017.I2FYB0	0	1752	COG1215@1|root,COG5022@1|root,KOG2571@2759|Eukaryota,KOG4229@2759|Eukaryota,38H3K@33154|Opisthokonta,3NU7V@4751|Fungi,3UYAW@5204|Basidiomycota,3MZG1@452284|Ustilaginomycotina	4751|Fungi	MN	Belongs to the TRAFAC class myosin-kinesin ATPase superfamily. Myosin family	-	GO:0005575,GO:0005622,GO:0005623,GO:0005737,GO:0005886,GO:0012506,GO:0016020,GO:0030659,GO:0031090,GO:0031410,GO:0031982,GO:0043226,GO:0043227,GO:0043229,GO:0044422,GO:0044424,GO:0044433,GO:0044444,GO:0044446,GO:0044464,GO:0071944,GO:0097708	2.4.1.16	ko:K00698	ko00520,map00520	-	R02335	RC00005	ko00000,ko00001,ko01000,ko01003	-	GT2	-	Chitin_synth_2,Cyt-b5,DEK_C,Myosin_head	IPR029044	Nucleotide-diphospho-sugar transferases	6	0	0	0	0	0	0	2	2	2	4	2	4	2	2	4	4	2	2	2	2	2	2	2	2	2	2
OG0000216	42374.XP_002418592.1	0	989	COG2730@1|root,2QRG8@2759|Eukaryota,38M6K@33154|Opisthokonta,3NUQG@4751|Fungi,3QNAB@4890|Ascomycota,3RXA7@4891|Saccharomycetes,47ANN@766764|Debaryomycetaceae	4751|Fungi	G	Belongs to the glycosyl hydrolase 5 (cellulase A) family	-	-	3.2.1.58	ko:K01210	ko00500,map00500	-	R00308,R03115	RC00467	ko00000,ko00001,ko01000	-	-	-	Cellulase	IPR050386	Glycosyl Hydrolase 5 (Cellulase A)	0	3	3	3	3	3	3	2	2	2	7	3	6	1	1	3	2	1	1	1	1	1	1	1	1	1	1
OG0000216	42374.XP_002418592.1	0	989	COG2730@1|root,2QRG8@2759|Eukaryota,38M6K@33154|Opisthokonta,3NUQG@4751|Fungi,3QNAB@4890|Ascomycota,3RXA7@4891|Saccharomycetes,47ANN@766764|Debaryomycetaceae	4751|Fungi	G	Belongs to the glycosyl hydrolase 5 (cellulase A) family	-	-	3.2.1.58	ko:K01210	ko00500,map00500	-	R00308,R03115	RC00467	ko00000,ko00001,ko01000	-	-	-	Cellulase	IPR017853	Glycoside hydrolase superfamily	0	3	3	3	3	3	3	2	2	2	7	3	6	1	1	3	2	1	1	1	1	1	1	1	1	1	1
OG0000217	42374.XP_002416910.1	1.55e-304	852	COG5309@1|root,2QUSB@2759|Eukaryota,38YVQ@33154|Opisthokonta,3P08F@4751|Fungi,3QSH2@4890|Ascomycota,3RTTX@4891|Saccharomycetes,47C3G@766764|Debaryomycetaceae	4751|Fungi	G	Belongs to the glycosyl hydrolase 17 family	-	-	3.2.1.58	ko:K01210	ko00500,map00500	-	R00308,R03115	RC00467	ko00000,ko00001,ko01000	-	-	-	Glyco_hydro_17	IPR050732	Beta-glucan modifying enzymes	0	3	2	3	3	3	2	2	2	2	4	2	4	0	0	0	0	0	0	0	0	0	1	1	1	2	1
OG0000217	42374.XP_002416910.1	1.55e-304	852	COG5309@1|root,2QUSB@2759|Eukaryota,38YVQ@33154|Opisthokonta,3P08F@4751|Fungi,3QSH2@4890|Ascomycota,3RTTX@4891|Saccharomycetes,47C3G@766764|Debaryomycetaceae	4751|Fungi	G	Belongs to the glycosyl hydrolase 17 family	-	-	3.2.1.58	ko:K01210	ko00500,map00500	-	R00308,R03115	RC00467	ko00000,ko00001,ko01000	-	-	-	Glyco_hydro_17	IPR017853	Glycoside hydrolase superfamily	0	3	2	3	3	3	2	2	2	2	4	2	4	0	0	0	0	0	0	0	0	0	1	1	1	2	1
OG0000263	430998.XP_007681000.1	2.52e-255	718	28NTU@1|root,2QVDT@2759|Eukaryota,38E23@33154|Opisthokonta,3NYQU@4751|Fungi,3QN39@4890|Ascomycota,200KY@147541|Dothideomycetes,3MH79@451867|Dothideomycetidae	4751|Fungi	I	Glycosyltransferase family 62 protein	ANP1	GO:0000030,GO:0000032,GO:0000136,GO:0000137,GO:0000139,GO:0003674,GO:0003824,GO:0005575,GO:0005622,GO:0005623,GO:0005737,GO:0005794,GO:0005795,GO:0006056,GO:0006057,GO:0006464,GO:0006486,GO:0006487,GO:0006807,GO:0008150,GO:0008152,GO:0009058,GO:0009059,GO:0009100,GO:0009101,GO:0009987,GO:0012505,GO:0016020,GO:0016021,GO:0016740,GO:0016757,GO:0016758,GO:0019538,GO:0030173,GO:0031090,GO:0031224,GO:…	-	ko:K05533	ko00513,ko01100,map00513,map01100	M00074	-	-	ko00000,ko00001,ko00002,ko01000	-	GT62	-	Anp1	IPR052086	Mannan Polymerase Complex Subunit	0	2	2	2	2	2	1	2	2	2	5	2	4	0	0	0	0	0	0	0	0	0	2	2	2	2	2
OG0000263	430998.XP_007681000.1	2.52e-255	718	28NTU@1|root,2QVDT@2759|Eukaryota,38E23@33154|Opisthokonta,3NYQU@4751|Fungi,3QN39@4890|Ascomycota,200KY@147541|Dothideomycetes,3MH79@451867|Dothideomycetidae	4751|Fungi	I	Glycosyltransferase family 62 protein	ANP1	GO:0000030,GO:0000032,GO:0000136,GO:0000137,GO:0000139,GO:0003674,GO:0003824,GO:0005575,GO:0005622,GO:0005623,GO:0005737,GO:0005794,GO:0005795,GO:0006056,GO:0006057,GO:0006464,GO:0006486,GO:0006487,GO:0006807,GO:0008150,GO:0008152,GO:0009058,GO:0009059,GO:0009100,GO:0009101,GO:0009987,GO:0012505,GO:0016020,GO:0016021,GO:0016740,GO:0016757,GO:0016758,GO:0019538,GO:0030173,GO:0031090,GO:0031224,GO:…	-	ko:K05533	ko00513,ko01100,map00513,map01100	M00074	-	-	ko00000,ko00001,ko00002,ko01000	-	GT62	-	Anp1	IPR029044	Nucleotide-diphospho-sugar transferases	0	2	2	2	2	2	1	2	2	2	5	2	4	0	0	0	0	0	0	0	0	0	2	2	2	2	2
OG0000301	310453.XP_007589487.1	5.13e-181	521	28KFK@1|root,2QSWP@2759|Eukaryota,38E1Q@33154|Opisthokonta,3NXU9@4751|Fungi,3QKK0@4890|Ascomycota,203NR@147541|Dothideomycetes	4751|Fungi	G	Glycosyl hydrolase family 76	-	-	3.2.1.101	ko:K08257	-	-	-	-	ko00000,ko00537,ko01000	-	GH76	-	Glyco_hydro_76	IPR014480	Mannan endo-1,6-alpha-mannosidase	0	2	2	2	2	2	2	2	2	2	4	2	4	0	0	0	0	0	0	0	0	0	2	2	2	2	2
OG0000301	310453.XP_007589487.1	5.13e-181	521	28KFK@1|root,2QSWP@2759|Eukaryota,38E1Q@33154|Opisthokonta,3NXU9@4751|Fungi,3QKK0@4890|Ascomycota,203NR@147541|Dothideomycetes	4751|Fungi	G	Glycosyl hydrolase family 76	-	-	3.2.1.101	ko:K08257	-	-	-	-	ko00000,ko00537,ko01000	-	GH76	-	Glyco_hydro_76	IPR008928	Six-hairpin glycosidase superfamily	0	2	2	2	2	2	2	2	2	2	4	2	4	0	0	0	0	0	0	0	0	0	2	2	2	2	2
OG0000323	63400.XP_003011537.1	0	962	COG1877@1|root,KOG1050@2759|Eukaryota,38EGS@33154|Opisthokonta,3NUM3@4751|Fungi,3QP00@4890|Ascomycota,20CCA@147545|Eurotiomycetes,3B6TV@33183|Onygenales,3FSFD@34384|Arthrodermataceae	4751|Fungi	G	Alpha,alpha-trehalose-phosphate synthase	-	-	2.4.1.15,2.4.1.347	ko:K00697	ko00500,ko01100,map00500,map01100	-	R02737	RC00005,RC00049,RC02748	ko00000,ko00001,ko01000,ko01003	-	GT20	-	Glyco_transf_20	IPR001830	Glycosyl transferase, family 20	1	1	1	1	1	1	1	2	2	2	2	1	1	1	1	2	2	1	1	1	1	1	2	2	2	2	1
OG0000323	63400.XP_003011537.1	0	962	COG1877@1|root,KOG1050@2759|Eukaryota,38EGS@33154|Opisthokonta,3NUM3@4751|Fungi,3QP00@4890|Ascomycota,20CCA@147545|Eurotiomycetes,3B6TV@33183|Onygenales,3FSFD@34384|Arthrodermataceae	4751|Fungi	G	Alpha,alpha-trehalose-phosphate synthase	-	-	2.4.1.15,2.4.1.347	ko:K00697	ko00500,ko01100,map00500,map01100	-	R02737	RC00005,RC00049,RC02748	ko00000,ko00001,ko01000,ko01003	-	GT20	-	Glyco_transf_20	IPR036291	NAD(P)-binding domain superfamily	1	1	1	1	1	1	1	2	2	2	2	1	1	1	1	2	2	1	1	1	1	1	2	2	2	2	1
OG0000333	5478.XP_449945.1	0	3235	KOG0916@1|root,KOG0916@2759|Eukaryota,38X8M@33154|Opisthokonta,3NZNQ@4751|Fungi,3QPT6@4890|Ascomycota,3RSE1@4891|Saccharomycetes,3RYFM@4893|Saccharomycetaceae	4751|Fungi	M	to Saccharomyces cerevisiae FKS3 (YMR306W)	FKS3	GO:0000003,GO:0003006,GO:0003674,GO:0003824,GO:0003843,GO:0005575,GO:0005622,GO:0005623,GO:0005737,GO:0005739,GO:0005783,GO:0007049,GO:0008150,GO:0008194,GO:0009272,GO:0009653,GO:0009987,GO:0010927,GO:0012505,GO:0016020,GO:0016021,GO:0016043,GO:0016740,GO:0016757,GO:0016758,GO:0019953,GO:0022402,GO:0022413,GO:0022414,GO:0022607,GO:0030154,GO:0030435,GO:0030437,GO:0030476,GO:0031224,GO:0031505,GO:…	2.4.1.34	ko:K00706	ko00500,ko04011,map00500,map04011	-	R03118	RC00005	ko00000,ko00001,ko01000,ko01003	-	GT48	-	FKS1_dom1,Glucan_synthase	IPR017853	Glycoside hydrolase superfamily	1	3	3	3	3	3	3	1	1	1	2	1	2	1	1	2	2	1	1	1	1	1	1	1	1	1	2
OG0000426	84751.XP_007880919.1	0	910	COG1928@1|root,KOG3359@2759|Eukaryota,38DG3@33154|Opisthokonta,3NURN@4751|Fungi,3UY50@5204|Basidiomycota,3N0EA@452284|Ustilaginomycotina	4751|Fungi	O	MIR domain	PMT2	GO:0000030,GO:0003674,GO:0003824,GO:0004169,GO:0005575,GO:0005622,GO:0005623,GO:0005737,GO:0005783,GO:0005789,GO:0005886,GO:0006464,GO:0006486,GO:0006493,GO:0006508,GO:0006515,GO:0006807,GO:0006810,GO:0006886,GO:0006950,GO:0008104,GO:0008150,GO:0008152,GO:0009056,GO:0009057,GO:0009058,GO:0009059,GO:0009100,GO:0009101,GO:0009268,GO:0009628,GO:0009966,GO:0009987,GO:0010033,GO:0010243,GO:0010498,GO:…	2.4.1.109	ko:K00728	ko00514,ko00515,ko01100,map00514,map00515,map01100	-	R04072,R07620,R11399	RC00005,RC00059,RC00397	ko00000,ko00001,ko01000,ko01003	-	GT39	iMM904.YAL023C,iMM904.YOR321W,iND750.YAL023C,iND750.YOR321W	MIR,PMT,PMT_4TMC	IPR027005	Glycosyltransferase 39-like	1	2	2	2	2	2	2	1	1	1	2	1	2	1	1	2	1	1	1	1	1	1	1	1	1	1	1
OG0000426	84751.XP_007880919.1	0	910	COG1928@1|root,KOG3359@2759|Eukaryota,38DG3@33154|Opisthokonta,3NURN@4751|Fungi,3UY50@5204|Basidiomycota,3N0EA@452284|Ustilaginomycotina	4751|Fungi	O	MIR domain	PMT2	GO:0000030,GO:0003674,GO:0003824,GO:0004169,GO:0005575,GO:0005622,GO:0005623,GO:0005737,GO:0005783,GO:0005789,GO:0005886,GO:0006464,GO:0006486,GO:0006493,GO:0006508,GO:0006515,GO:0006807,GO:0006810,GO:0006886,GO:0006950,GO:0008104,GO:0008150,GO:0008152,GO:0009056,GO:0009057,GO:0009058,GO:0009059,GO:0009100,GO:0009101,GO:0009268,GO:0009628,GO:0009966,GO:0009987,GO:0010033,GO:0010243,GO:0010498,GO:…	2.4.1.109	ko:K00728	ko00514,ko00515,ko01100,map00514,map00515,map01100	-	R04072,R07620,R11399	RC00005,RC00059,RC00397	ko00000,ko00001,ko01000,ko01003	-	GT39	iMM904.YAL023C,iMM904.YOR321W,iND750.YAL023C,iND750.YOR321W	MIR,PMT,PMT_4TMC	IPR036300	Mir domain superfamily	1	2	2	2	2	2	2	1	1	1	2	1	2	1	1	2	1	1	1	1	1	1	1	1	1	1	1
OG0000523	5480.G8B6K6	0	1727	2AI8K@1|root,2RZ48@2759|Eukaryota,39XBV@33154|Opisthokonta,3NZ5A@4751|Fungi,3QSYU@4890|Ascomycota,3RTNG@4891|Saccharomycetes,47AW1@766764|Debaryomycetaceae	4751|Fungi	S	Responsible for addition of the terminal mannose residues to the outer chain of core N-linked polysaccharides and to O-linked mannotriose. Implicated in late Golgi modifications (By similarity)	MNN13	-	-	ko:K05538	ko00513,ko00514,ko01100,map00513,map00514,map01100	-	R09302,R09303	-	ko00000,ko00001,ko01000,ko01003	-	GT71	-	Mannosyl_trans3	IPR029044	Nucleotide-diphospho-sugar transferases	1	4	4	4	3	3	8	0	0	0	0	0	0	0	0	0	0	0	0	0	0	0	0	0	0	0	0
OG0000584	82508.K1VYR6	7.84e-125	384	COG3774@1|root,2QW2I@2759|Eukaryota,39T08@33154|Opisthokonta,3NUUF@4751|Fungi,3V1YE@5204|Basidiomycota,3VF20@5234|Tremellales	4751|Fungi	G	to TIGR gene model, INSD accession	-	-	2.4.1.232	ko:K05528	ko00513,ko01100,map00513,map01100	M00074	R08599	-	ko00000,ko00001,ko00002,ko01000,ko01003	-	GT32	-	Gly_transf_sug	IPR039367	Initiation-specific alpha-1,6-mannosyltransferase Och1-like	4	2	2	2	2	2	1	1	1	1	2	2	2	0	0	0	0	0	0	0	0	0	1	1	1	1	1
OG0000584	82508.K1VYR6	7.84e-125	384	COG3774@1|root,2QW2I@2759|Eukaryota,39T08@33154|Opisthokonta,3NUUF@4751|Fungi,3V1YE@5204|Basidiomycota,3VF20@5234|Tremellales	4751|Fungi	G	to TIGR gene model, INSD accession	-	-	2.4.1.232	ko:K05528	ko00513,ko01100,map00513,map01100	M00074	R08599	-	ko00000,ko00001,ko00002,ko01000,ko01003	-	GT32	-	Gly_transf_sug	IPR029044	Nucleotide-diphospho-sugar transferases	4	2	2	2	2	2	1	1	1	1	2	2	2	0	0	0	0	0	0	0	0	0	1	1	1	1	1
OG0000644	430998.XP_007680956.1	4.51e-225	645	COG1087@1|root,KOG1371@2759|Eukaryota,38C46@33154|Opisthokonta,3NVGX@4751|Fungi,3QKVK@4890|Ascomycota,201A1@147541|Dothideomycetes,3MG4M@451867|Dothideomycetidae	4751|Fungi	Q	GDP-mannose 4,6 dehydratase	GAL10	GO:0003674,GO:0003824,GO:0003978,GO:0004034,GO:0005488,GO:0005515,GO:0005575,GO:0005622,GO:0005623,GO:0005737,GO:0005829,GO:0005975,GO:0005996,GO:0006012,GO:0006464,GO:0006486,GO:0006807,GO:0008150,GO:0008152,GO:0009056,GO:0009058,GO:0009059,GO:0009100,GO:0009101,GO:0009987,GO:0016052,GO:0016853,GO:0016854,GO:0016857,GO:0019318,GO:0019320,GO:0019388,GO:0019538,GO:0033499,GO:0034645,GO:0036211,GO:…	5.1.3.2,5.1.3.3	ko:K01784,ko:K01785	ko00010,ko00052,ko00520,ko01100,ko01110,ko01120,ko01130,map00010,map00052,map00520,map01100,map01110,map01120,map01130	M00361,M00362,M00632	R00291,R01602,R02984,R10619	RC00289,RC00563	ko00000,ko00001,ko00002,ko01000	-	-	iMM904.YBR019C,iND750.YBR019C	Aldose_epim,Epimerase,GDP_Man_Dehyd	IPR050360	Major Facilitator Superfamily Sugar Transporters	2	1	1	1	1	1	1	1	1	1	4	3	6	1	1	1	2	1	1	1	1	1	1	1	1	1	1
OG0000644	430998.XP_007680956.1	4.51e-225	645	COG1087@1|root,KOG1371@2759|Eukaryota,38C46@33154|Opisthokonta,3NVGX@4751|Fungi,3QKVK@4890|Ascomycota,201A1@147541|Dothideomycetes,3MG4M@451867|Dothideomycetidae	4751|Fungi	Q	GDP-mannose 4,6 dehydratase	GAL10	GO:0003674,GO:0003824,GO:0003978,GO:0004034,GO:0005488,GO:0005515,GO:0005575,GO:0005622,GO:0005623,GO:0005737,GO:0005829,GO:0005975,GO:0005996,GO:0006012,GO:0006464,GO:0006486,GO:0006807,GO:0008150,GO:0008152,GO:0009056,GO:0009058,GO:0009059,GO:0009100,GO:0009101,GO:0009987,GO:0016052,GO:0016853,GO:0016854,GO:0016857,GO:0019318,GO:0019320,GO:0019388,GO:0019538,GO:0033499,GO:0034645,GO:0036211,GO:…	5.1.3.2,5.1.3.3	ko:K01784,ko:K01785	ko00010,ko00052,ko00520,ko01100,ko01110,ko01120,ko01130,map00010,map00052,map00520,map01100,map01110,map01120,map01130	M00361,M00362,M00632	R00291,R01602,R02984,R10619	RC00289,RC00563	ko00000,ko00001,ko00002,ko01000	-	-	iMM904.YBR019C,iND750.YBR019C	Aldose_epim,Epimerase,GDP_Man_Dehyd	IPR036259	MFS transporter superfamily	2	1	1	1	1	1	1	1	1	1	4	3	6	1	1	1	2	1	1	1	1	1	1	1	1	1	1
OG0000644	430998.XP_007680956.1	4.51e-225	645	COG1087@1|root,KOG1371@2759|Eukaryota,38C46@33154|Opisthokonta,3NVGX@4751|Fungi,3QKVK@4890|Ascomycota,201A1@147541|Dothideomycetes,3MG4M@451867|Dothideomycetidae	4751|Fungi	Q	GDP-mannose 4,6 dehydratase	GAL10	GO:0003674,GO:0003824,GO:0003978,GO:0004034,GO:0005488,GO:0005515,GO:0005575,GO:0005622,GO:0005623,GO:0005737,GO:0005829,GO:0005975,GO:0005996,GO:0006012,GO:0006464,GO:0006486,GO:0006807,GO:0008150,GO:0008152,GO:0009056,GO:0009058,GO:0009059,GO:0009100,GO:0009101,GO:0009987,GO:0016052,GO:0016853,GO:0016854,GO:0016857,GO:0019318,GO:0019320,GO:0019388,GO:0019538,GO:0033499,GO:0034645,GO:0036211,GO:…	5.1.3.2,5.1.3.3	ko:K01784,ko:K01785	ko00010,ko00052,ko00520,ko01100,ko01110,ko01120,ko01130,map00010,map00052,map00520,map01100,map01110,map01120,map01130	M00361,M00362,M00632	R00291,R01602,R02984,R10619	RC00289,RC00563	ko00000,ko00001,ko00002,ko01000	-	-	iMM904.YBR019C,iND750.YBR019C	Aldose_epim,Epimerase,GDP_Man_Dehyd	IPR036291	NAD(P)-binding domain superfamily	2	1	1	1	1	1	1	1	1	1	4	3	6	1	1	1	2	1	1	1	1	1	1	1	1	1	1
OG0000673	327079.R9NZB0	0	1477	COG1215@1|root,KOG2571@2759|Eukaryota,38B4U@33154|Opisthokonta,3NTYK@4751|Fungi,3UZK6@5204|Basidiomycota,3N55S@452284|Ustilaginomycotina	4751|Fungi	M	Chitin synthase	CHS3	GO:0000003,GO:0000131,GO:0000271,GO:0003006,GO:0003674,GO:0003824,GO:0004100,GO:0005575,GO:0005622,GO:0005623,GO:0005628,GO:0005737,GO:0005783,GO:0005886,GO:0005933,GO:0005935,GO:0005937,GO:0005975,GO:0005976,GO:0006022,GO:0006023,GO:0006030,GO:0006031,GO:0006037,GO:0006038,GO:0006040,GO:0006807,GO:0007049,GO:0008150,GO:0008152,GO:0008194,GO:0008375,GO:0009058,GO:0009059,GO:0009272,GO:0009653,GO:…	2.4.1.16	ko:K00698	ko00520,map00520	-	R02335	RC00005	ko00000,ko00001,ko01000,ko01003	-	GT2	iMM904.YBR023C,iND750.YBR023C	Chitin_synth_2	IPR004835	Chitin synthase	2	1	1	1	1	1	1	1	1	1	2	1	2	1	1	1	2	1	1	1	1	1	1	1	1	1	1
OG0000673	327079.R9NZB0	0	1477	COG1215@1|root,KOG2571@2759|Eukaryota,38B4U@33154|Opisthokonta,3NTYK@4751|Fungi,3UZK6@5204|Basidiomycota,3N55S@452284|Ustilaginomycotina	4751|Fungi	M	Chitin synthase	CHS3	GO:0000003,GO:0000131,GO:0000271,GO:0003006,GO:0003674,GO:0003824,GO:0004100,GO:0005575,GO:0005622,GO:0005623,GO:0005628,GO:0005737,GO:0005783,GO:0005886,GO:0005933,GO:0005935,GO:0005937,GO:0005975,GO:0005976,GO:0006022,GO:0006023,GO:0006030,GO:0006031,GO:0006037,GO:0006038,GO:0006040,GO:0006807,GO:0007049,GO:0008150,GO:0008152,GO:0008194,GO:0008375,GO:0009058,GO:0009059,GO:0009272,GO:0009653,GO:…	2.4.1.16	ko:K00698	ko00520,map00520	-	R02335	RC00005	ko00000,ko00001,ko01000,ko01003	-	GT2	iMM904.YBR023C,iND750.YBR023C	Chitin_synth_2	IPR029044	Nucleotide-diphospho-sugar transferases	2	1	1	1	1	1	1	1	1	1	2	1	2	1	1	1	2	1	1	1	1	1	1	1	1	1	1
OG0000688	1392244.V5GG59	0	1089	COG1877@1|root,KOG1050@2759|Eukaryota,38CEK@33154|Opisthokonta,3NU3V@4751|Fungi,3UZ1J@5204|Basidiomycota,3MZPB@452284|Ustilaginomycotina	4751|Fungi	G	Trehalose-phosphatase	-	-	2.4.1.15,3.1.3.12	ko:K16055	ko00500,ko01100,map00500,map01100	-	R02737,R02778	RC00005,RC00017,RC00049,RC02748	ko00000,ko00001,ko01000,ko01003	-	GT20	-	Glyco_transf_20,Trehalose_PPase	IPR036026	Seven-hairpin glycosidases	2	1	1	1	1	1	1	1	1	1	2	1	2	1	1	2	2	2	1	1	1	1	1	1	1	1	1
OG0000688	1392244.V5GG59	0	1089	COG1877@1|root,KOG1050@2759|Eukaryota,38CEK@33154|Opisthokonta,3NU3V@4751|Fungi,3UZ1J@5204|Basidiomycota,3MZPB@452284|Ustilaginomycotina	4751|Fungi	G	Trehalose-phosphatase	-	-	2.4.1.15,3.1.3.12	ko:K16055	ko00500,ko01100,map00500,map01100	-	R02737,R02778	RC00005,RC00017,RC00049,RC02748	ko00000,ko00001,ko01000,ko01003	-	GT20	-	Glyco_transf_20,Trehalose_PPase	IPR001830	Glycosyl transferase, family 20	2	1	1	1	1	1	1	1	1	1	2	1	2	1	1	2	2	2	1	1	1	1	1	1	1	1	1
OG0000688	1392244.V5GG59	0	1089	COG1877@1|root,KOG1050@2759|Eukaryota,38CEK@33154|Opisthokonta,3NU3V@4751|Fungi,3UZ1J@5204|Basidiomycota,3MZPB@452284|Ustilaginomycotina	4751|Fungi	G	Trehalose-phosphatase	-	-	2.4.1.15,3.1.3.12	ko:K16055	ko00500,ko01100,map00500,map01100	-	R02737,R02778	RC00005,RC00017,RC00049,RC02748	ko00000,ko00001,ko01000,ko01003	-	GT20	-	Glyco_transf_20,Trehalose_PPase	IPR036412	HAD-like superfamily	2	1	1	1	1	1	1	1	1	1	2	1	2	1	1	2	2	2	1	1	1	1	1	1	1	1	1
OG0000769	82508.K1VQA0	0	1549	COG1928@1|root,KOG3359@2759|Eukaryota,38DG3@33154|Opisthokonta,3NUGH@4751|Fungi,3UY2Q@5204|Basidiomycota,3VEM0@5234|Tremellales	4751|Fungi	O	MIR domain	PMT1	GO:0000030,GO:0000032,GO:0003674,GO:0003824,GO:0004169,GO:0005575,GO:0005622,GO:0005623,GO:0005737,GO:0005783,GO:0005789,GO:0005886,GO:0006056,GO:0006057,GO:0006464,GO:0006486,GO:0006493,GO:0006508,GO:0006515,GO:0006807,GO:0006810,GO:0006886,GO:0006950,GO:0007154,GO:0007155,GO:0008104,GO:0008150,GO:0008152,GO:0009056,GO:0009057,GO:0009058,GO:0009059,GO:0009100,GO:0009101,GO:0009267,GO:0009405,GO:…	2.4.1.109	ko:K00728	ko00514,ko00515,ko01100,map00514,map00515,map01100	-	R04072,R07620,R11399	RC00005,RC00059,RC00397	ko00000,ko00001,ko01000,ko01003	-	GT39	-	MIR,PMT,PMT_4TMC	IPR012340	Nucleic acid-binding, OB-fold	0	2	1	1	2	2	2	1	1	1	2	1	1	1	1	2	2	1	1	1	1	1	1	1	1	1	1
OG0000769	82508.K1VQA0	0	1549	COG1928@1|root,KOG3359@2759|Eukaryota,38DG3@33154|Opisthokonta,3NUGH@4751|Fungi,3UY2Q@5204|Basidiomycota,3VEM0@5234|Tremellales	4751|Fungi	O	MIR domain	PMT1	GO:0000030,GO:0000032,GO:0003674,GO:0003824,GO:0004169,GO:0005575,GO:0005622,GO:0005623,GO:0005737,GO:0005783,GO:0005789,GO:0005886,GO:0006056,GO:0006057,GO:0006464,GO:0006486,GO:0006493,GO:0006508,GO:0006515,GO:0006807,GO:0006810,GO:0006886,GO:0006950,GO:0007154,GO:0007155,GO:0008104,GO:0008150,GO:0008152,GO:0009056,GO:0009057,GO:0009058,GO:0009059,GO:0009100,GO:0009101,GO:0009267,GO:0009405,GO:…	2.4.1.109	ko:K00728	ko00514,ko00515,ko01100,map00514,map00515,map01100	-	R04072,R07620,R11399	RC00005,RC00059,RC00397	ko00000,ko00001,ko01000,ko01003	-	GT39	-	MIR,PMT,PMT_4TMC	IPR036300	Mir domain superfamily	0	2	1	1	2	2	2	1	1	1	2	1	1	1	1	2	2	1	1	1	1	1	1	1	1	1	1
OG0000769	82508.K1VQA0	0	1549	COG1928@1|root,KOG3359@2759|Eukaryota,38DG3@33154|Opisthokonta,3NUGH@4751|Fungi,3UY2Q@5204|Basidiomycota,3VEM0@5234|Tremellales	4751|Fungi	O	MIR domain	PMT1	GO:0000030,GO:0000032,GO:0003674,GO:0003824,GO:0004169,GO:0005575,GO:0005622,GO:0005623,GO:0005737,GO:0005783,GO:0005789,GO:0005886,GO:0006056,GO:0006057,GO:0006464,GO:0006486,GO:0006493,GO:0006508,GO:0006515,GO:0006807,GO:0006810,GO:0006886,GO:0006950,GO:0007154,GO:0007155,GO:0008104,GO:0008150,GO:0008152,GO:0009056,GO:0009057,GO:0009058,GO:0009059,GO:0009100,GO:0009101,GO:0009267,GO:0009405,GO:…	2.4.1.109	ko:K00728	ko00514,ko00515,ko01100,map00514,map00515,map01100	-	R04072,R07620,R11399	RC00005,RC00059,RC00397	ko00000,ko00001,ko01000,ko01003	-	GT39	-	MIR,PMT,PMT_4TMC	IPR027005	Glycosyltransferase 39-like	0	2	1	1	2	2	2	1	1	1	2	1	1	1	1	2	2	1	1	1	1	1	1	1	1	1	1
OG0001006	430998.XP_007677255.1	0	2091	KOG1879@1|root,KOG1879@2759|Eukaryota,38FK5@33154|Opisthokonta,3NVVK@4751|Fungi,3QK0R@4890|Ascomycota,200WF@147541|Dothideomycetes,3MIA8@451867|Dothideomycetidae	4751|Fungi	G	Glycosyltransferase family 24 protein	KRE5	GO:0000271,GO:0003674,GO:0003824,GO:0003980,GO:0005488,GO:0005509,GO:0005515,GO:0005537,GO:0005575,GO:0005622,GO:0005623,GO:0005737,GO:0005783,GO:0005788,GO:0005975,GO:0005976,GO:0006011,GO:0006073,GO:0006139,GO:0006457,GO:0006458,GO:0006464,GO:0006486,GO:0006487,GO:0006491,GO:0006508,GO:0006515,GO:0006725,GO:0006793,GO:0006807,GO:0006950,GO:0006986,GO:0007154,GO:0007165,GO:0008150,GO:0008152,GO:…	-	ko:K11718	ko04141,map04141	-	-	-	ko00000,ko00001,ko01000,ko01003	-	GT24	-	Glyco_transf_8,UDP-g_GGTase	IPR009448	UDP-glucose:Glycoprotein Glucosyltransferase	1	1	0	1	1	1	1	1	1	1	2	1	1	1	1	2	2	1	1	1	1	1	1	1	1	1	2
OG0001006	430998.XP_007677255.1	0	2091	KOG1879@1|root,KOG1879@2759|Eukaryota,38FK5@33154|Opisthokonta,3NVVK@4751|Fungi,3QK0R@4890|Ascomycota,200WF@147541|Dothideomycetes,3MIA8@451867|Dothideomycetidae	4751|Fungi	G	Glycosyltransferase family 24 protein	KRE5	GO:0000271,GO:0003674,GO:0003824,GO:0003980,GO:0005488,GO:0005509,GO:0005515,GO:0005537,GO:0005575,GO:0005622,GO:0005623,GO:0005737,GO:0005783,GO:0005788,GO:0005975,GO:0005976,GO:0006011,GO:0006073,GO:0006139,GO:0006457,GO:0006458,GO:0006464,GO:0006486,GO:0006487,GO:0006491,GO:0006508,GO:0006515,GO:0006725,GO:0006793,GO:0006807,GO:0006950,GO:0006986,GO:0007154,GO:0007165,GO:0008150,GO:0008152,GO:…	-	ko:K11718	ko04141,map04141	-	-	-	ko00000,ko00001,ko01000,ko01003	-	GT24	-	Glyco_transf_8,UDP-g_GGTase	IPR029044	Nucleotide-diphospho-sugar transferases	1	1	0	1	1	1	1	1	1	1	2	1	1	1	1	2	2	1	1	1	1	1	1	1	1	1	2
OG0001006	430998.XP_007677255.1	0	2091	KOG1879@1|root,KOG1879@2759|Eukaryota,38FK5@33154|Opisthokonta,3NVVK@4751|Fungi,3QK0R@4890|Ascomycota,200WF@147541|Dothideomycetes,3MIA8@451867|Dothideomycetidae	4751|Fungi	G	Glycosyltransferase family 24 protein	KRE5	GO:0000271,GO:0003674,GO:0003824,GO:0003980,GO:0005488,GO:0005509,GO:0005515,GO:0005537,GO:0005575,GO:0005622,GO:0005623,GO:0005737,GO:0005783,GO:0005788,GO:0005975,GO:0005976,GO:0006011,GO:0006073,GO:0006139,GO:0006457,GO:0006458,GO:0006464,GO:0006486,GO:0006487,GO:0006491,GO:0006508,GO:0006515,GO:0006725,GO:0006793,GO:0006807,GO:0006950,GO:0006986,GO:0007154,GO:0007165,GO:0008150,GO:0008152,GO:…	-	ko:K11718	ko04141,map04141	-	-	-	ko00000,ko00001,ko01000,ko01003	-	GT24	-	Glyco_transf_8,UDP-g_GGTase	IPR027417	P-loop containing nucleoside triphosphate hydrolase	1	1	0	1	1	1	1	1	1	1	2	1	1	1	1	2	2	1	1	1	1	1	1	1	1	1	2
OG0001209	84751.XP_007878195.1	1.2e-194	593	COG2273@1|root,2QR13@2759|Eukaryota,38E3H@33154|Opisthokonta,3NUWF@4751|Fungi,3UYZU@5204|Basidiomycota,3N3R9@452284|Ustilaginomycotina	4751|Fungi	G	Beta-glucan synthesis-associated protein (SKN1)	-	-	-	ko:K21850	-	-	-	-	ko00000,ko04131	-	GH16	-	SKN1	IPR013320	Concanavalin A-like lectin/glucanase domain superfamily	2	1	0	1	1	1	1	1	1	1	2	1	2	1	1	2	2	1	1	1	1	1	1	1	1	1	1
OG0001209	84751.XP_007878195.1	1.2e-194	593	COG2273@1|root,2QR13@2759|Eukaryota,38E3H@33154|Opisthokonta,3NUWF@4751|Fungi,3UYZU@5204|Basidiomycota,3N3R9@452284|Ustilaginomycotina	4751|Fungi	G	Beta-glucan synthesis-associated protein (SKN1)	-	-	-	ko:K21850	-	-	-	-	ko00000,ko04131	-	GH16	-	SKN1	IPR029060	PIN-like domain superfamily	2	1	0	1	1	1	1	1	1	1	2	1	2	1	1	2	2	1	1	1	1	1	1	1	1	1	1
OG0001209	84751.XP_007878195.1	1.2e-194	593	COG2273@1|root,2QR13@2759|Eukaryota,38E3H@33154|Opisthokonta,3NUWF@4751|Fungi,3UYZU@5204|Basidiomycota,3N3R9@452284|Ustilaginomycotina	4751|Fungi	G	Beta-glucan synthesis-associated protein (SKN1)	-	-	-	ko:K21850	-	-	-	-	ko00000,ko04131	-	GH16	-	SKN1	IPR023426	Flap endonuclease 1	2	1	0	1	1	1	1	1	1	1	2	1	2	1	1	2	2	1	1	1	1	1	1	1	1	1	1
OG0001209	84751.XP_007878195.1	1.2e-194	593	COG2273@1|root,2QR13@2759|Eukaryota,38E3H@33154|Opisthokonta,3NUWF@4751|Fungi,3UYZU@5204|Basidiomycota,3N3R9@452284|Ustilaginomycotina	4751|Fungi	G	Beta-glucan synthesis-associated protein (SKN1)	-	-	-	ko:K21850	-	-	-	-	ko00000,ko04131	-	GH16	-	SKN1	IPR036279	5'-3' exonuclease, C-terminal domain superfamily	2	1	0	1	1	1	1	1	1	1	2	1	2	1	1	2	2	1	1	1	1	1	1	1	1	1	1
OG0001209	84751.XP_007878195.1	1.2e-194	593	COG2273@1|root,2QR13@2759|Eukaryota,38E3H@33154|Opisthokonta,3NUWF@4751|Fungi,3UYZU@5204|Basidiomycota,3N3R9@452284|Ustilaginomycotina	4751|Fungi	G	Beta-glucan synthesis-associated protein (SKN1)	-	-	-	ko:K21850	-	-	-	-	ko00000,ko04131	-	GH16	-	SKN1	IPR005629	Beta-glucan synthesis-associated protein Skn1/Kre6/Sbg1	2	1	0	1	1	1	1	1	1	1	2	1	2	1	1	2	2	1	1	1	1	1	1	1	1	1	1
OG0001214	82508.K1VDE5	4.49e-303	829	COG0547@1|root,KOG1438@2759|Eukaryota,38E82@33154|Opisthokonta,3NWSM@4751|Fungi,3UZUP@5204|Basidiomycota,3VD5W@5234|Tremellales	4751|Fungi	E	Glycosyl transferase family, a/b domain	TRP4	GO:0000162,GO:0003674,GO:0003824,GO:0004048,GO:0005575,GO:0005622,GO:0005623,GO:0005634,GO:0005737,GO:0006082,GO:0006520,GO:0006568,GO:0006576,GO:0006586,GO:0006725,GO:0006807,GO:0008150,GO:0008152,GO:0008652,GO:0009058,GO:0009072,GO:0009073,GO:0009308,GO:0009309,GO:0009987,GO:0016053,GO:0016740,GO:0016757,GO:0016763,GO:0018130,GO:0019438,GO:0019752,GO:0034641,GO:0042401,GO:0042430,GO:0042435,GO:…	2.4.2.18	ko:K00766	ko00400,ko01100,ko01110,ko01130,ko01230,map00400,map01100,map01110,map01130,map01230	M00023	R01073	RC00440	ko00000,ko00001,ko00002,ko01000	-	-	-	Glycos_trans_3N,Glycos_transf_3	IPR005940	Anthranilate phosphoribosyl transferase	1	1	1	1	1	1	1	1	1	1	2	1	2	1	1	2	2	1	1	1	1	1	1	1	1	1	1
OG0001214	82508.K1VDE5	4.49e-303	829	COG0547@1|root,KOG1438@2759|Eukaryota,38E82@33154|Opisthokonta,3NWSM@4751|Fungi,3UZUP@5204|Basidiomycota,3VD5W@5234|Tremellales	4751|Fungi	E	Glycosyl transferase family, a/b domain	TRP4	GO:0000162,GO:0003674,GO:0003824,GO:0004048,GO:0005575,GO:0005622,GO:0005623,GO:0005634,GO:0005737,GO:0006082,GO:0006520,GO:0006568,GO:0006576,GO:0006586,GO:0006725,GO:0006807,GO:0008150,GO:0008152,GO:0008652,GO:0009058,GO:0009072,GO:0009073,GO:0009308,GO:0009309,GO:0009987,GO:0016053,GO:0016740,GO:0016757,GO:0016763,GO:0018130,GO:0019438,GO:0019752,GO:0034641,GO:0042401,GO:0042430,GO:0042435,GO:…	2.4.2.18	ko:K00766	ko00400,ko01100,ko01110,ko01130,ko01230,map00400,map01100,map01110,map01130,map01230	M00023	R01073	RC00440	ko00000,ko00001,ko00002,ko01000	-	-	-	Glycos_trans_3N,Glycos_transf_3	IPR005940	Anthranilate phosphoribosyl transferase	1	1	1	1	1	1	1	1	1	1	2	1	2	1	1	2	2	1	1	1	1	1	1	1	1	1	1
OG0001214	82508.K1VDE5	4.49e-303	829	COG0547@1|root,KOG1438@2759|Eukaryota,38E82@33154|Opisthokonta,3NWSM@4751|Fungi,3UZUP@5204|Basidiomycota,3VD5W@5234|Tremellales	4751|Fungi	E	Glycosyl transferase family, a/b domain	TRP4	GO:0000162,GO:0003674,GO:0003824,GO:0004048,GO:0005575,GO:0005622,GO:0005623,GO:0005634,GO:0005737,GO:0006082,GO:0006520,GO:0006568,GO:0006576,GO:0006586,GO:0006725,GO:0006807,GO:0008150,GO:0008152,GO:0008652,GO:0009058,GO:0009072,GO:0009073,GO:0009308,GO:0009309,GO:0009987,GO:0016053,GO:0016740,GO:0016757,GO:0016763,GO:0018130,GO:0019438,GO:0019752,GO:0034641,GO:0042401,GO:0042430,GO:0042435,GO:…	2.4.2.18	ko:K00766	ko00400,ko01100,ko01110,ko01130,ko01230,map00400,map01100,map01110,map01130,map01230	M00023	R01073	RC00440	ko00000,ko00001,ko00002,ko01000	-	-	-	Glycos_trans_3N,Glycos_transf_3	IPR035902	Nucleoside phosphorylase/phosphoribosyltransferase catalytic domain superfamily	1	1	1	1	1	1	1	1	1	1	2	1	2	1	1	2	2	1	1	1	1	1	1	1	1	1	1
OG0001255	82508.K1VYT7	0	1218	COG0438@1|root,KOG1387@2759|Eukaryota,38HCD@33154|Opisthokonta,3NV7J@4751|Fungi,3V075@5204|Basidiomycota,3VE25@5234|Tremellales	4751|Fungi	M	ALG11 mannosyltransferase N-terminus	ALG11	GO:0000026,GO:0000030,GO:0003674,GO:0003824,GO:0004376,GO:0004377,GO:0005575,GO:0005622,GO:0005623,GO:0005737,GO:0005783,GO:0005789,GO:0006464,GO:0006486,GO:0006487,GO:0006488,GO:0006490,GO:0006629,GO:0006807,GO:0008150,GO:0008152,GO:0009058,GO:0009059,GO:0009100,GO:0009101,GO:0009987,GO:0012505,GO:0016020,GO:0016740,GO:0016757,GO:0016758,GO:0019538,GO:0031984,GO:0033577,GO:0034645,GO:0036211,GO:…	2.4.1.131	ko:K03844	ko00510,ko00513,ko01100,map00510,map00513,map01100	M00055	R06127,R06128	-	ko00000,ko00001,ko00002,ko01000,ko01003	-	GT4	-	ALG11_N,Glycos_transf_1	IPR038013	ALG11 mannosyltransferase	1	1	1	1	1	1	1	1	1	1	1	1	0	1	1	2	2	1	1	1	1	1	1	1	1	1	1
OG0001259	63400.XP_003015369.1	0	1479	COG1287@1|root,KOG2292@2759|Eukaryota,38D8E@33154|Opisthokonta,3NV6G@4751|Fungi,3QNEK@4890|Ascomycota,20CUI@147545|Eurotiomycetes,3B0X4@33183|Onygenales,3FWY2@34384|Arthrodermataceae	4751|Fungi	O	Oligosaccharyl transferase STT3 subunit	STT3	GO:0003674,GO:0003824,GO:0004576,GO:0004579,GO:0005575,GO:0005622,GO:0005623,GO:0005737,GO:0005783,GO:0005789,GO:0006464,GO:0006486,GO:0006487,GO:0006807,GO:0008150,GO:0008152,GO:0008250,GO:0009058,GO:0009059,GO:0009100,GO:0009101,GO:0009987,GO:0012505,GO:0016020,GO:0016021,GO:0016740,GO:0016757,GO:0016758,GO:0018193,GO:0018196,GO:0018279,GO:0019538,GO:0031224,GO:0031984,GO:0032991,GO:0034645,GO:…	2.4.99.18	ko:K07151	ko00510,ko00513,ko01100,ko04141,map00510,map00513,map01100,map04141	M00072	R04216,R05976	RC00005,RC00482	ko00000,ko00001,ko00002,ko01000,ko01003	-	GT66	-	STT3	IPR011009	Protein kinase-like domain superfamily	1	1	1	1	1	1	1	1	1	1	2	1	2	1	1	2	2	1	1	1	1	1	1	1	1	1	1
OG0001259	63400.XP_003015369.1	0	1479	COG1287@1|root,KOG2292@2759|Eukaryota,38D8E@33154|Opisthokonta,3NV6G@4751|Fungi,3QNEK@4890|Ascomycota,20CUI@147545|Eurotiomycetes,3B0X4@33183|Onygenales,3FWY2@34384|Arthrodermataceae	4751|Fungi	O	Oligosaccharyl transferase STT3 subunit	STT3	GO:0003674,GO:0003824,GO:0004576,GO:0004579,GO:0005575,GO:0005622,GO:0005623,GO:0005737,GO:0005783,GO:0005789,GO:0006464,GO:0006486,GO:0006487,GO:0006807,GO:0008150,GO:0008152,GO:0008250,GO:0009058,GO:0009059,GO:0009100,GO:0009101,GO:0009987,GO:0012505,GO:0016020,GO:0016021,GO:0016740,GO:0016757,GO:0016758,GO:0018193,GO:0018196,GO:0018279,GO:0019538,GO:0031224,GO:0031984,GO:0032991,GO:0034645,GO:…	2.4.99.18	ko:K07151	ko00510,ko00513,ko01100,ko04141,map00510,map00513,map01100,map04141	M00072	R04216,R05976	RC00005,RC00482	ko00000,ko00001,ko00002,ko01000,ko01003	-	GT66	-	STT3	IPR003674	Oligosaccharyl transferase, STT3 subunit	1	1	1	1	1	1	1	1	1	1	2	1	2	1	1	2	2	1	1	1	1	1	1	1	1	1	1
OG0001266	430998.XP_007678056.1	1.1e-167	479	COG0627@1|root,KOG3101@2759|Eukaryota,38RFR@33154|Opisthokonta,3NW46@4751|Fungi,3QKQ7@4890|Ascomycota,200ZT@147541|Dothideomycetes,3MHIA@451867|Dothideomycetidae	4751|Fungi	S	Serine hydrolase involved in the detoxification of formaldehyde	-	GO:0003674,GO:0003824,GO:0005575,GO:0005622,GO:0005623,GO:0005737,GO:0005829,GO:0006081,GO:0008150,GO:0008152,GO:0009056,GO:0009636,GO:0009987,GO:0010033,GO:0016787,GO:0016788,GO:0016790,GO:0016999,GO:0017001,GO:0017144,GO:0018738,GO:0042221,GO:0044237,GO:0044248,GO:0044281,GO:0044282,GO:0044424,GO:0044444,GO:0044464,GO:0046185,GO:0046292,GO:0046294,GO:0050896,GO:0051716,GO:0070887,GO:0071704,GO:…	3.1.2.12	ko:K01070	ko00680,ko01120,ko01200,map00680,map01120,map01200	-	R00527	RC00167,RC00320	ko00000,ko00001,ko01000	-	CE1	-	Esterase	IPR036161	RPB6/omega subunit-like superfamily	1	1	1	1	1	1	1	1	1	1	2	1	2	1	1	2	2	1	1	1	1	1	1	1	1	1	1
OG0001266	430998.XP_007678056.1	1.1e-167	479	COG0627@1|root,KOG3101@2759|Eukaryota,38RFR@33154|Opisthokonta,3NW46@4751|Fungi,3QKQ7@4890|Ascomycota,200ZT@147541|Dothideomycetes,3MHIA@451867|Dothideomycetidae	4751|Fungi	S	Serine hydrolase involved in the detoxification of formaldehyde	-	GO:0003674,GO:0003824,GO:0005575,GO:0005622,GO:0005623,GO:0005737,GO:0005829,GO:0006081,GO:0008150,GO:0008152,GO:0009056,GO:0009636,GO:0009987,GO:0010033,GO:0016787,GO:0016788,GO:0016790,GO:0016999,GO:0017001,GO:0017144,GO:0018738,GO:0042221,GO:0044237,GO:0044248,GO:0044281,GO:0044282,GO:0044424,GO:0044444,GO:0044464,GO:0046185,GO:0046292,GO:0046294,GO:0050896,GO:0051716,GO:0070887,GO:0071704,GO:…	3.1.2.12	ko:K01070	ko00680,ko01120,ko01200,map00680,map01120,map01200	-	R00527	RC00167,RC00320	ko00000,ko00001,ko01000	-	CE1	-	Esterase	IPR029058	Alpha/Beta hydrolase fold	1	1	1	1	1	1	1	1	1	1	2	1	2	1	1	2	2	1	1	1	1	1	1	1	1	1	1
OG0001266	430998.XP_007678056.1	1.1e-167	479	COG0627@1|root,KOG3101@2759|Eukaryota,38RFR@33154|Opisthokonta,3NW46@4751|Fungi,3QKQ7@4890|Ascomycota,200ZT@147541|Dothideomycetes,3MHIA@451867|Dothideomycetidae	4751|Fungi	S	Serine hydrolase involved in the detoxification of formaldehyde	-	GO:0003674,GO:0003824,GO:0005575,GO:0005622,GO:0005623,GO:0005737,GO:0005829,GO:0006081,GO:0008150,GO:0008152,GO:0009056,GO:0009636,GO:0009987,GO:0010033,GO:0016787,GO:0016788,GO:0016790,GO:0016999,GO:0017001,GO:0017144,GO:0018738,GO:0042221,GO:0044237,GO:0044248,GO:0044281,GO:0044282,GO:0044424,GO:0044444,GO:0044464,GO:0046185,GO:0046292,GO:0046294,GO:0050896,GO:0051716,GO:0070887,GO:0071704,GO:…	3.1.2.12	ko:K01070	ko00680,ko01120,ko01200,map00680,map01120,map01200	-	R00527	RC00167,RC00320	ko00000,ko00001,ko01000	-	CE1	-	Esterase	IPR006111	Archaeal Rpo6/eukaryotic RPB6 RNA polymerase subunit	1	1	1	1	1	1	1	1	1	1	2	1	2	1	1	2	2	1	1	1	1	1	1	1	1	1	1
OG0001266	430998.XP_007678056.1	1.1e-167	479	COG0627@1|root,KOG3101@2759|Eukaryota,38RFR@33154|Opisthokonta,3NW46@4751|Fungi,3QKQ7@4890|Ascomycota,200ZT@147541|Dothideomycetes,3MHIA@451867|Dothideomycetidae	4751|Fungi	S	Serine hydrolase involved in the detoxification of formaldehyde	-	GO:0003674,GO:0003824,GO:0005575,GO:0005622,GO:0005623,GO:0005737,GO:0005829,GO:0006081,GO:0008150,GO:0008152,GO:0009056,GO:0009636,GO:0009987,GO:0010033,GO:0016787,GO:0016788,GO:0016790,GO:0016999,GO:0017001,GO:0017144,GO:0018738,GO:0042221,GO:0044237,GO:0044248,GO:0044281,GO:0044282,GO:0044424,GO:0044444,GO:0044464,GO:0046185,GO:0046292,GO:0046294,GO:0050896,GO:0051716,GO:0070887,GO:0071704,GO:…	3.1.2.12	ko:K01070	ko00680,ko01120,ko01200,map00680,map01120,map01200	-	R00527	RC00167,RC00320	ko00000,ko00001,ko01000	-	CE1	-	Esterase	IPR014186	S-formylglutathione hydrolase	1	1	1	1	1	1	1	1	1	1	2	1	2	1	1	2	2	1	1	1	1	1	1	1	1	1	1
OG0001315	64363.EME46003	0	1320	COG1501@1|root,KOG1065@2759|Eukaryota,38C0A@33154|Opisthokonta,3NVMX@4751|Fungi,3QM0J@4890|Ascomycota,203W8@147541|Dothideomycetes,3MJP5@451867|Dothideomycetidae	4751|Fungi	G	Belongs to the glycosyl hydrolase 31 family	-	GO:0000023,GO:0000025,GO:0000272,GO:0003674,GO:0003824,GO:0004553,GO:0005575,GO:0005576,GO:0005618,GO:0005623,GO:0005975,GO:0005976,GO:0005984,GO:0008150,GO:0008152,GO:0009056,GO:0009057,GO:0009311,GO:0009313,GO:0009987,GO:0015926,GO:0016020,GO:0016052,GO:0016787,GO:0016798,GO:0030312,GO:0032450,GO:0042710,GO:0043170,GO:0044010,GO:0044011,GO:0044237,GO:0044238,GO:0044247,GO:0044248,GO:0044260,GO:…	3.2.1.20	ko:K01187	ko00052,ko00500,ko01100,map00052,map00500,map01100	-	R00028,R00801,R00802,R06087,R06088	RC00028,RC00049,RC00077	ko00000,ko00001,ko01000	-	GH31	-	Gal_mutarotas_2,Glyco_hydro_31,NtCtMGAM_N	IPR011013	Galactose mutarotase-like domain superfamily	2	2	2	2	1	1	2	1	1	1	2	1	2	0	0	0	0	0	0	0	0	0	1	1	1	1	2
OG0001315	64363.EME46003	0	1320	COG1501@1|root,KOG1065@2759|Eukaryota,38C0A@33154|Opisthokonta,3NVMX@4751|Fungi,3QM0J@4890|Ascomycota,203W8@147541|Dothideomycetes,3MJP5@451867|Dothideomycetidae	4751|Fungi	G	Belongs to the glycosyl hydrolase 31 family	-	GO:0000023,GO:0000025,GO:0000272,GO:0003674,GO:0003824,GO:0004553,GO:0005575,GO:0005576,GO:0005618,GO:0005623,GO:0005975,GO:0005976,GO:0005984,GO:0008150,GO:0008152,GO:0009056,GO:0009057,GO:0009311,GO:0009313,GO:0009987,GO:0015926,GO:0016020,GO:0016052,GO:0016787,GO:0016798,GO:0030312,GO:0032450,GO:0042710,GO:0043170,GO:0044010,GO:0044011,GO:0044237,GO:0044238,GO:0044247,GO:0044248,GO:0044260,GO:…	3.2.1.20	ko:K01187	ko00052,ko00500,ko01100,map00052,map00500,map01100	-	R00028,R00801,R00802,R06087,R06088	RC00028,RC00049,RC00077	ko00000,ko00001,ko01000	-	GH31	-	Gal_mutarotas_2,Glyco_hydro_31,NtCtMGAM_N	IPR017853	Glycoside hydrolase superfamily	2	2	2	2	1	1	2	1	1	1	2	1	2	0	0	0	0	0	0	0	0	0	1	1	1	1	2
OG0001315	64363.EME46003	0	1320	COG1501@1|root,KOG1065@2759|Eukaryota,38C0A@33154|Opisthokonta,3NVMX@4751|Fungi,3QM0J@4890|Ascomycota,203W8@147541|Dothideomycetes,3MJP5@451867|Dothideomycetidae	4751|Fungi	G	Belongs to the glycosyl hydrolase 31 family	-	GO:0000023,GO:0000025,GO:0000272,GO:0003674,GO:0003824,GO:0004553,GO:0005575,GO:0005576,GO:0005618,GO:0005623,GO:0005975,GO:0005976,GO:0005984,GO:0008150,GO:0008152,GO:0009056,GO:0009057,GO:0009311,GO:0009313,GO:0009987,GO:0015926,GO:0016020,GO:0016052,GO:0016787,GO:0016798,GO:0030312,GO:0032450,GO:0042710,GO:0043170,GO:0044010,GO:0044011,GO:0044237,GO:0044238,GO:0044247,GO:0044248,GO:0044260,GO:…	3.2.1.20	ko:K01187	ko00052,ko00500,ko01100,map00052,map00500,map01100	-	R00028,R00801,R00802,R06087,R06088	RC00028,RC00049,RC00077	ko00000,ko00001,ko01000	-	GH31	-	Gal_mutarotas_2,Glyco_hydro_31,NtCtMGAM_N	IPR029044	Nucleotide-diphospho-sugar transferases	2	2	2	2	1	1	2	1	1	1	2	1	2	0	0	0	0	0	0	0	0	0	1	1	1	1	2
OG0001464	82508.K1W141	2.52e-223	619	COG0040@1|root,KOG2831@2759|Eukaryota,38BT1@33154|Opisthokonta,3NU58@4751|Fungi,3UZGR@5204|Basidiomycota,3VD07@5234|Tremellales	4751|Fungi	E	ATP phosphoribosyltransferase	HIS1	GO:0000105,GO:0003674,GO:0003824,GO:0003879,GO:0006082,GO:0006520,GO:0006547,GO:0006725,GO:0006807,GO:0008150,GO:0008152,GO:0008652,GO:0009058,GO:0009987,GO:0016053,GO:0016740,GO:0016757,GO:0016763,GO:0018130,GO:0019438,GO:0019752,GO:0034641,GO:0043436,GO:0044237,GO:0044238,GO:0044249,GO:0044281,GO:0044283,GO:0046394,GO:0046483,GO:0052803,GO:0071704,GO:1901360,GO:1901362,GO:1901564,GO:1901566,GO:…	2.4.2.17	ko:K00765	ko00340,ko01100,ko01110,ko01230,map00340,map01100,map01110,map01230	M00026	R01071	RC02819,RC03200	ko00000,ko00001,ko00002,ko01000	-	-	-	HisG,HisG_C	IPR001348	ATP phosphoribosyltransferase HisG	1	1	1	1	1	1	1	1	1	1	2	1	2	1	1	2	2	1	1	1	1	1	1	1	1	1	1
OG0001464	82508.K1W141	2.52e-223	619	COG0040@1|root,KOG2831@2759|Eukaryota,38BT1@33154|Opisthokonta,3NU58@4751|Fungi,3UZGR@5204|Basidiomycota,3VD07@5234|Tremellales	4751|Fungi	E	ATP phosphoribosyltransferase	HIS1	GO:0000105,GO:0003674,GO:0003824,GO:0003879,GO:0006082,GO:0006520,GO:0006547,GO:0006725,GO:0006807,GO:0008150,GO:0008152,GO:0008652,GO:0009058,GO:0009987,GO:0016053,GO:0016740,GO:0016757,GO:0016763,GO:0018130,GO:0019438,GO:0019752,GO:0034641,GO:0043436,GO:0044237,GO:0044238,GO:0044249,GO:0044281,GO:0044283,GO:0046394,GO:0046483,GO:0052803,GO:0071704,GO:1901360,GO:1901362,GO:1901564,GO:1901566,GO:…	2.4.2.17	ko:K00765	ko00340,ko01100,ko01110,ko01230,map00340,map01100,map01110,map01230	M00026	R01071	RC02819,RC03200	ko00000,ko00001,ko00002,ko01000	-	-	-	HisG,HisG_C	IPR011322	Nitrogen regulatory PII-like, alpha/beta	1	1	1	1	1	1	1	1	1	1	2	1	2	1	1	2	2	1	1	1	1	1	1	1	1	1	1
OG0001464	82508.K1W141	2.52e-223	619	COG0040@1|root,KOG2831@2759|Eukaryota,38BT1@33154|Opisthokonta,3NU58@4751|Fungi,3UZGR@5204|Basidiomycota,3VD07@5234|Tremellales	4751|Fungi	E	ATP phosphoribosyltransferase	HIS1	GO:0000105,GO:0003674,GO:0003824,GO:0003879,GO:0006082,GO:0006520,GO:0006547,GO:0006725,GO:0006807,GO:0008150,GO:0008152,GO:0008652,GO:0009058,GO:0009987,GO:0016053,GO:0016740,GO:0016757,GO:0016763,GO:0018130,GO:0019438,GO:0019752,GO:0034641,GO:0043436,GO:0044237,GO:0044238,GO:0044249,GO:0044281,GO:0044283,GO:0046394,GO:0046483,GO:0052803,GO:0071704,GO:1901360,GO:1901362,GO:1901564,GO:1901566,GO:…	2.4.2.17	ko:K00765	ko00340,ko01100,ko01110,ko01230,map00340,map01100,map01110,map01230	M00026	R01071	RC02819,RC03200	ko00000,ko00001,ko00002,ko01000	-	-	-	HisG,HisG_C	IPR020621	ATP phosphoribosyltransferase HisG, long form	1	1	1	1	1	1	1	1	1	1	2	1	2	1	1	2	2	1	1	1	1	1	1	1	1	1	1
OG0001489	430998.XP_007679604.1	2.78e-123	357	COG0461@1|root,KOG1377@2759|Eukaryota,39WUY@33154|Opisthokonta,3NY1H@4751|Fungi,3QR2R@4890|Ascomycota,1ZXDF@147541|Dothideomycetes,3MGCB@451867|Dothideomycetidae	4751|Fungi	F	Phosphoribosyl transferase domain	URA5	GO:0003674,GO:0003824,GO:0004588,GO:0005575,GO:0005622,GO:0005623,GO:0005634,GO:0005737,GO:0006139,GO:0006206,GO:0006207,GO:0006213,GO:0006725,GO:0006807,GO:0008150,GO:0008152,GO:0009058,GO:0009112,GO:0009116,GO:0009119,GO:0009163,GO:0009987,GO:0016740,GO:0016757,GO:0016763,GO:0018130,GO:0019438,GO:0019856,GO:0034404,GO:0034641,GO:0034654,GO:0042455,GO:0043226,GO:0043227,GO:0043229,GO:0043231,GO:…	2.4.2.10	ko:K00762	ko00240,ko01100,map00240,map01100	M00051	R01870	RC00611	ko00000,ko00001,ko00002,ko01000	-	-	-	Pribosyltran	IPR023031	Orotate phosphoribosyltransferase	1	1	0	1	1	1	1	1	1	1	2	1	2	1	1	2	2	1	1	1	1	1	1	1	1	1	1
OG0001489	430998.XP_007679604.1	2.78e-123	357	COG0461@1|root,KOG1377@2759|Eukaryota,39WUY@33154|Opisthokonta,3NY1H@4751|Fungi,3QR2R@4890|Ascomycota,1ZXDF@147541|Dothideomycetes,3MGCB@451867|Dothideomycetidae	4751|Fungi	F	Phosphoribosyl transferase domain	URA5	GO:0003674,GO:0003824,GO:0004588,GO:0005575,GO:0005622,GO:0005623,GO:0005634,GO:0005737,GO:0006139,GO:0006206,GO:0006207,GO:0006213,GO:0006725,GO:0006807,GO:0008150,GO:0008152,GO:0009058,GO:0009112,GO:0009116,GO:0009119,GO:0009163,GO:0009987,GO:0016740,GO:0016757,GO:0016763,GO:0018130,GO:0019438,GO:0019856,GO:0034404,GO:0034641,GO:0034654,GO:0042455,GO:0043226,GO:0043227,GO:0043229,GO:0043231,GO:…	2.4.2.10	ko:K00762	ko00240,ko01100,map00240,map01100	M00051	R01870	RC00611	ko00000,ko00001,ko00002,ko01000	-	-	-	Pribosyltran	IPR029057	Phosphoribosyltransferase-like	1	1	0	1	1	1	1	1	1	1	2	1	2	1	1	2	2	1	1	1	1	1	1	1	1	1	1
OG0001507	5551.XP_003238320.1	4.99e-198	549	COG0463@1|root,KOG2978@2759|Eukaryota,38E12@33154|Opisthokonta,3NUQC@4751|Fungi,3QRBR@4890|Ascomycota,20BC7@147545|Eurotiomycetes,3B1PF@33183|Onygenales,3FUC5@34384|Arthrodermataceae	4751|Fungi	M	Glycosyltransferase like family 2	DPM1	GO:0000030,GO:0003674,GO:0003824,GO:0004582,GO:0005575,GO:0005622,GO:0005623,GO:0005737,GO:0005739,GO:0005740,GO:0005741,GO:0005783,GO:0005789,GO:0006464,GO:0006486,GO:0006487,GO:0006488,GO:0006490,GO:0006493,GO:0006497,GO:0006505,GO:0006506,GO:0006629,GO:0006643,GO:0006644,GO:0006650,GO:0006661,GO:0006664,GO:0006793,GO:0006796,GO:0006807,GO:0008150,GO:0008152,GO:0008610,GO:0008654,GO:0009058,GO:…	2.4.1.83	ko:K00721	ko00510,ko01100,map00510,map01100	-	R01009	RC00005	ko00000,ko00001,ko01000,ko01003	-	GT2	-	Glycos_transf_2	IPR029044	Nucleotide-diphospho-sugar transferases	1	1	1	1	1	1	1	1	1	1	2	1	2	1	1	2	1	1	1	1	1	1	1	1	1	1	1
OG0001507	5551.XP_003238320.1	4.99e-198	549	COG0463@1|root,KOG2978@2759|Eukaryota,38E12@33154|Opisthokonta,3NUQC@4751|Fungi,3QRBR@4890|Ascomycota,20BC7@147545|Eurotiomycetes,3B1PF@33183|Onygenales,3FUC5@34384|Arthrodermataceae	4751|Fungi	M	Glycosyltransferase like family 2	DPM1	GO:0000030,GO:0003674,GO:0003824,GO:0004582,GO:0005575,GO:0005622,GO:0005623,GO:0005737,GO:0005739,GO:0005740,GO:0005741,GO:0005783,GO:0005789,GO:0006464,GO:0006486,GO:0006487,GO:0006488,GO:0006490,GO:0006493,GO:0006497,GO:0006505,GO:0006506,GO:0006629,GO:0006643,GO:0006644,GO:0006650,GO:0006661,GO:0006664,GO:0006793,GO:0006796,GO:0006807,GO:0008150,GO:0008152,GO:0008610,GO:0008654,GO:0009058,GO:…	2.4.1.83	ko:K00721	ko00510,ko01100,map00510,map01100	-	R01009	RC00005	ko00000,ko00001,ko01000,ko01003	-	GT2	-	Glycos_transf_2	IPR039528	DPM1-like	1	1	1	1	1	1	1	1	1	1	2	1	2	1	1	2	1	1	1	1	1	1	1	1	1	1	1
OG0001697	84751.XP_007881019.1	1.68e-284	820	COG1928@1|root,KOG3359@2759|Eukaryota,38DG3@33154|Opisthokonta,3NV01@4751|Fungi,3UZ8Q@5204|Basidiomycota,3MZ0B@452284|Ustilaginomycotina	4751|Fungi	O	MIR domain	PMT4	GO:0000030,GO:0000032,GO:0003674,GO:0003824,GO:0004169,GO:0005575,GO:0005622,GO:0005623,GO:0005737,GO:0005783,GO:0005789,GO:0005886,GO:0006056,GO:0006057,GO:0006464,GO:0006486,GO:0006493,GO:0006508,GO:0006515,GO:0006807,GO:0006950,GO:0008150,GO:0008152,GO:0009056,GO:0009057,GO:0009058,GO:0009059,GO:0009100,GO:0009101,GO:0009268,GO:0009405,GO:0009628,GO:0009892,GO:0009966,GO:0009987,GO:0010033,GO:…	2.4.1.109	ko:K00728	ko00514,ko00515,ko01100,map00514,map00515,map01100	-	R04072,R07620,R11399	RC00005,RC00059,RC00397	ko00000,ko00001,ko01000,ko01003	-	GT39	-	MIR,PMT,PMT_4TMC	IPR016024	Armadillo-type fold	1	1	1	1	1	1	1	1	1	1	2	1	2	1	1	1	1	1	1	1	1	1	1	1	1	1	1
OG0001697	84751.XP_007881019.1	1.68e-284	820	COG1928@1|root,KOG3359@2759|Eukaryota,38DG3@33154|Opisthokonta,3NV01@4751|Fungi,3UZ8Q@5204|Basidiomycota,3MZ0B@452284|Ustilaginomycotina	4751|Fungi	O	MIR domain	PMT4	GO:0000030,GO:0000032,GO:0003674,GO:0003824,GO:0004169,GO:0005575,GO:0005622,GO:0005623,GO:0005737,GO:0005783,GO:0005789,GO:0005886,GO:0006056,GO:0006057,GO:0006464,GO:0006486,GO:0006493,GO:0006508,GO:0006515,GO:0006807,GO:0006950,GO:0008150,GO:0008152,GO:0009056,GO:0009057,GO:0009058,GO:0009059,GO:0009100,GO:0009101,GO:0009268,GO:0009405,GO:0009628,GO:0009892,GO:0009966,GO:0009987,GO:0010033,GO:…	2.4.1.109	ko:K00728	ko00514,ko00515,ko01100,map00514,map00515,map01100	-	R04072,R07620,R11399	RC00005,RC00059,RC00397	ko00000,ko00001,ko01000,ko01003	-	GT39	-	MIR,PMT,PMT_4TMC	IPR027005	Glycosyltransferase 39-like	1	1	1	1	1	1	1	1	1	1	2	1	2	1	1	1	1	1	1	1	1	1	1	1	1	1	1
OG0001697	84751.XP_007881019.1	1.68e-284	820	COG1928@1|root,KOG3359@2759|Eukaryota,38DG3@33154|Opisthokonta,3NV01@4751|Fungi,3UZ8Q@5204|Basidiomycota,3MZ0B@452284|Ustilaginomycotina	4751|Fungi	O	MIR domain	PMT4	GO:0000030,GO:0000032,GO:0003674,GO:0003824,GO:0004169,GO:0005575,GO:0005622,GO:0005623,GO:0005737,GO:0005783,GO:0005789,GO:0005886,GO:0006056,GO:0006057,GO:0006464,GO:0006486,GO:0006493,GO:0006508,GO:0006515,GO:0006807,GO:0006950,GO:0008150,GO:0008152,GO:0009056,GO:0009057,GO:0009058,GO:0009059,GO:0009100,GO:0009101,GO:0009268,GO:0009405,GO:0009628,GO:0009892,GO:0009966,GO:0009987,GO:0010033,GO:…	2.4.1.109	ko:K00728	ko00514,ko00515,ko01100,map00514,map00515,map01100	-	R04072,R07620,R11399	RC00005,RC00059,RC00397	ko00000,ko00001,ko01000,ko01003	-	GT39	-	MIR,PMT,PMT_4TMC	IPR036300	Mir domain superfamily	1	1	1	1	1	1	1	1	1	1	2	1	2	1	1	1	1	1	1	1	1	1	1	1	1	1	1
OG0001729	327079.R9PDI6	5.49e-186	534	COG0191@1|root,KOG4153@2759|Eukaryota,38EK5@33154|Opisthokonta,3NVQC@4751|Fungi,3UXTW@5204|Basidiomycota,3N00W@452284|Ustilaginomycotina	4751|Fungi	G	Fructose-bisphosphate aldolase class-II	FBA1	GO:0003674,GO:0003824,GO:0004332,GO:0005488,GO:0005575,GO:0005618,GO:0005622,GO:0005623,GO:0005737,GO:0005739,GO:0005829,GO:0005886,GO:0005975,GO:0005996,GO:0006006,GO:0006007,GO:0006082,GO:0006090,GO:0006091,GO:0006094,GO:0006096,GO:0006139,GO:0006163,GO:0006164,GO:0006165,GO:0006725,GO:0006732,GO:0006733,GO:0006734,GO:0006735,GO:0006753,GO:0006754,GO:0006757,GO:0006793,GO:0006796,GO:0006807,GO:…	3.2.1.25,4.1.2.13	ko:K01192,ko:K01624	ko00010,ko00030,ko00051,ko00511,ko00680,ko00710,ko01100,ko01110,ko01120,ko01130,ko01200,ko01230,ko04142,map00010,map00030,map00051,map00511,map00680,map00710,map01100,map01110,map01120,map01130,map01200,map01230,map04142	M00001,M00003,M00165,M00167,M00344,M00345	R01068,R01070,R01829,R02568	RC00438,RC00439,RC00603,RC00604	ko00000,ko00001,ko00002,ko01000	-	-	-	F_bP_aldolase	IPR006411	Fructose-bisphosphate aldolase, class II, yeast/E. coli subtype	0	1	1	1	1	1	1	1	1	1	1	1	2	1	1	1	2	1	1	1	1	1	1	1	1	1	1
OG0001729	327079.R9PDI6	5.49e-186	534	COG0191@1|root,KOG4153@2759|Eukaryota,38EK5@33154|Opisthokonta,3NVQC@4751|Fungi,3UXTW@5204|Basidiomycota,3N00W@452284|Ustilaginomycotina	4751|Fungi	G	Fructose-bisphosphate aldolase class-II	FBA1	GO:0003674,GO:0003824,GO:0004332,GO:0005488,GO:0005575,GO:0005618,GO:0005622,GO:0005623,GO:0005737,GO:0005739,GO:0005829,GO:0005886,GO:0005975,GO:0005996,GO:0006006,GO:0006007,GO:0006082,GO:0006090,GO:0006091,GO:0006094,GO:0006096,GO:0006139,GO:0006163,GO:0006164,GO:0006165,GO:0006725,GO:0006732,GO:0006733,GO:0006734,GO:0006735,GO:0006753,GO:0006754,GO:0006757,GO:0006793,GO:0006796,GO:0006807,GO:…	3.2.1.25,4.1.2.13	ko:K01192,ko:K01624	ko00010,ko00030,ko00051,ko00511,ko00680,ko00710,ko01100,ko01110,ko01120,ko01130,ko01200,ko01230,ko04142,map00010,map00030,map00051,map00511,map00680,map00710,map01100,map01110,map01120,map01130,map01200,map01230,map04142	M00001,M00003,M00165,M00167,M00344,M00345	R01068,R01070,R01829,R02568	RC00438,RC00439,RC00603,RC00604	ko00000,ko00001,ko00002,ko01000	-	-	-	F_bP_aldolase	IPR036497	Glycolipid transfer protein superfamily	0	1	1	1	1	1	1	1	1	1	1	1	2	1	1	1	2	1	1	1	1	1	1	1	1	1	1
OG0001756	63400.XP_003014316.1	0	1103	COG0034@1|root,KOG0572@2759|Eukaryota,38CJP@33154|Opisthokonta,3NUVG@4751|Fungi,3QMZW@4890|Ascomycota,20BYK@147545|Eurotiomycetes,3AZMM@33183|Onygenales,3FXR5@34384|Arthrodermataceae	4751|Fungi	F	Phosphoribosyl transferase domain	ADE4	GO:0003674,GO:0003824,GO:0004044,GO:0005575,GO:0005622,GO:0005623,GO:0005737,GO:0006139,GO:0006144,GO:0006163,GO:0006164,GO:0006188,GO:0006189,GO:0006725,GO:0006753,GO:0006793,GO:0006796,GO:0006807,GO:0008150,GO:0008152,GO:0009058,GO:0009112,GO:0009113,GO:0009117,GO:0009123,GO:0009124,GO:0009126,GO:0009127,GO:0009150,GO:0009152,GO:0009156,GO:0009161,GO:0009165,GO:0009167,GO:0009168,GO:0009259,GO:…	2.4.2.14	ko:K00764	ko00230,ko00250,ko01100,ko01110,ko01130,map00230,map00250,map01100,map01110,map01130	M00048	R01072	RC00010,RC02724,RC02752	ko00000,ko00001,ko00002,ko01000,ko01002	-	-	-	GATase_6,Pribosyltran	IPR029055	Nucleophile aminohydrolases, N-terminal	1	1	0	1	1	1	1	1	1	1	1	1	2	1	1	2	2	1	1	1	1	1	1	1	1	1	1
OG0001756	63400.XP_003014316.1	0	1103	COG0034@1|root,KOG0572@2759|Eukaryota,38CJP@33154|Opisthokonta,3NUVG@4751|Fungi,3QMZW@4890|Ascomycota,20BYK@147545|Eurotiomycetes,3AZMM@33183|Onygenales,3FXR5@34384|Arthrodermataceae	4751|Fungi	F	Phosphoribosyl transferase domain	ADE4	GO:0003674,GO:0003824,GO:0004044,GO:0005575,GO:0005622,GO:0005623,GO:0005737,GO:0006139,GO:0006144,GO:0006163,GO:0006164,GO:0006188,GO:0006189,GO:0006725,GO:0006753,GO:0006793,GO:0006796,GO:0006807,GO:0008150,GO:0008152,GO:0009058,GO:0009112,GO:0009113,GO:0009117,GO:0009123,GO:0009124,GO:0009126,GO:0009127,GO:0009150,GO:0009152,GO:0009156,GO:0009161,GO:0009165,GO:0009167,GO:0009168,GO:0009259,GO:…	2.4.2.14	ko:K00764	ko00230,ko00250,ko01100,ko01110,ko01130,map00230,map00250,map01100,map01110,map01130	M00048	R01072	RC00010,RC02724,RC02752	ko00000,ko00001,ko00002,ko01000,ko01002	-	-	-	GATase_6,Pribosyltran	IPR029057	Phosphoribosyltransferase-like	1	1	0	1	1	1	1	1	1	1	1	1	2	1	1	2	2	1	1	1	1	1	1	1	1	1	1
OG0001756	63400.XP_003014316.1	0	1103	COG0034@1|root,KOG0572@2759|Eukaryota,38CJP@33154|Opisthokonta,3NUVG@4751|Fungi,3QMZW@4890|Ascomycota,20BYK@147545|Eurotiomycetes,3AZMM@33183|Onygenales,3FXR5@34384|Arthrodermataceae	4751|Fungi	F	Phosphoribosyl transferase domain	ADE4	GO:0003674,GO:0003824,GO:0004044,GO:0005575,GO:0005622,GO:0005623,GO:0005737,GO:0006139,GO:0006144,GO:0006163,GO:0006164,GO:0006188,GO:0006189,GO:0006725,GO:0006753,GO:0006793,GO:0006796,GO:0006807,GO:0008150,GO:0008152,GO:0009058,GO:0009112,GO:0009113,GO:0009117,GO:0009123,GO:0009124,GO:0009126,GO:0009127,GO:0009150,GO:0009152,GO:0009156,GO:0009161,GO:0009165,GO:0009167,GO:0009168,GO:0009259,GO:…	2.4.2.14	ko:K00764	ko00230,ko00250,ko01100,ko01110,ko01130,map00230,map00250,map01100,map01110,map01130	M00048	R01072	RC00010,RC02724,RC02752	ko00000,ko00001,ko00002,ko01000,ko01002	-	-	-	GATase_6,Pribosyltran	IPR005854	Amidophosphoribosyltransferase	1	1	0	1	1	1	1	1	1	1	1	1	2	1	1	2	2	1	1	1	1	1	1	1	1	1	1
OG0001760	63402.XP_003173730.1	0	1047	COG1171@1|root,KOG2547@2759|Eukaryota,38DAM@33154|Opisthokonta,3NX2E@4751|Fungi,3QR56@4890|Ascomycota,20D1G@147545|Eurotiomycetes,3B1PE@33183|Onygenales,3FUNA@34384|Arthrodermataceae	4751|Fungi	IM	Glycosyl transferase family 21	HSX11	GO:0003674,GO:0003824,GO:0006629,GO:0006643,GO:0006664,GO:0006665,GO:0006672,GO:0006677,GO:0006678,GO:0006679,GO:0006687,GO:0006688,GO:0006807,GO:0008120,GO:0008150,GO:0008152,GO:0008194,GO:0008610,GO:0009058,GO:0009247,GO:0009405,GO:0009987,GO:0016740,GO:0016757,GO:0016758,GO:0030148,GO:0030447,GO:0034641,GO:0035251,GO:0040007,GO:0043603,GO:0043604,GO:0044237,GO:0044238,GO:0044249,GO:0044255,GO:…	2.4.1.80	ko:K00720	ko00600,ko01100,map00600,map01100	M00066	R01497	RC00005,RC00059	ko00000,ko00001,ko00002,ko01000,ko01003,ko02000	4.D.1.4	GT21	-	Glyco_transf_21	IPR025993	Ceramide glucosyltransferase	2	1	1	1	1	1	1	0	1	1	2	1	2	1	1	2	2	1	1	1	1	1	1	1	1	1	1
OG0001760	63402.XP_003173730.1	0	1047	COG1171@1|root,KOG2547@2759|Eukaryota,38DAM@33154|Opisthokonta,3NX2E@4751|Fungi,3QR56@4890|Ascomycota,20D1G@147545|Eurotiomycetes,3B1PE@33183|Onygenales,3FUNA@34384|Arthrodermataceae	4751|Fungi	IM	Glycosyl transferase family 21	HSX11	GO:0003674,GO:0003824,GO:0006629,GO:0006643,GO:0006664,GO:0006665,GO:0006672,GO:0006677,GO:0006678,GO:0006679,GO:0006687,GO:0006688,GO:0006807,GO:0008120,GO:0008150,GO:0008152,GO:0008194,GO:0008610,GO:0009058,GO:0009247,GO:0009405,GO:0009987,GO:0016740,GO:0016757,GO:0016758,GO:0030148,GO:0030447,GO:0034641,GO:0035251,GO:0040007,GO:0043603,GO:0043604,GO:0044237,GO:0044238,GO:0044249,GO:0044255,GO:…	2.4.1.80	ko:K00720	ko00600,ko01100,map00600,map01100	M00066	R01497	RC00005,RC00059	ko00000,ko00001,ko00002,ko01000,ko01003,ko02000	4.D.1.4	GT21	-	Glyco_transf_21	IPR029044	Nucleotide-diphospho-sugar transferases	2	1	1	1	1	1	1	0	1	1	2	1	2	1	1	2	2	1	1	1	1	1	1	1	1	1	1
OG0001763	1392244.V5GHV5	3.84e-122	379	COG0438@1|root,KOG0853@2759|Eukaryota,38TSM@33154|Opisthokonta,3NW8K@4751|Fungi,3UZKZ@5204|Basidiomycota,3MZG9@452284|Ustilaginomycotina	4751|Fungi	M	Glycosyltransferase Family 4	ALG2	GO:0000009,GO:0000030,GO:0000033,GO:0003674,GO:0003824,GO:0004376,GO:0004378,GO:0005575,GO:0005622,GO:0005623,GO:0005737,GO:0005783,GO:0005789,GO:0006464,GO:0006486,GO:0006487,GO:0006488,GO:0006490,GO:0006629,GO:0006807,GO:0008150,GO:0008152,GO:0009058,GO:0009059,GO:0009100,GO:0009101,GO:0009987,GO:0012505,GO:0016020,GO:0016021,GO:0016740,GO:0016757,GO:0016758,GO:0019538,GO:0030176,GO:0031224,GO:…	2.4.1.132,2.4.1.257	ko:K03843	ko00510,ko00513,ko01100,map00510,map00513,map01100	M00055	R05973,R06238	-	ko00000,ko00001,ko00002,ko01000,ko01003	-	GT4	-	Glyco_transf_4,Glycos_transf_1	IPR027054	Mannosyltransferase ALG2	1	1	1	1	1	1	1	1	1	1	1	2	0	1	1	2	2	1	1	1	1	1	1	1	1	1	1
OG0001774	63400.XP_003015159.1	9.87e-153	434	COG0572@1|root,KOG4203@2759|Eukaryota,38HIZ@33154|Opisthokonta,3NUU8@4751|Fungi,3QKQZ@4890|Ascomycota,20D5J@147545|Eurotiomycetes,3B1C3@33183|Onygenales,3FS9Z@34384|Arthrodermataceae	4751|Fungi	TZ	Uracil phosphoribosyltransferase	FUR1	GO:0003674,GO:0003824,GO:0004845,GO:0004849,GO:0005575,GO:0005622,GO:0005623,GO:0005737,GO:0005829,GO:0006139,GO:0006206,GO:0006213,GO:0006220,GO:0006221,GO:0006222,GO:0006725,GO:0006753,GO:0006793,GO:0006796,GO:0006807,GO:0008150,GO:0008152,GO:0008655,GO:0009058,GO:0009112,GO:0009116,GO:0009117,GO:0009119,GO:0009123,GO:0009124,GO:0009129,GO:0009130,GO:0009156,GO:0009161,GO:0009163,GO:0009165,GO:…	2.4.2.9	ko:K00761	ko00240,ko01100,map00240,map01100	-	R00966	RC00063	ko00000,ko00001,ko01000	-	-	-	UPRTase	IPR029057	Phosphoribosyltransferase-like	2	1	1	1	1	1	1	1	1	1	1	1	1	1	1	2	2	1	1	1	1	1	1	1	1	1	1
OG0001774	63400.XP_003015159.1	9.87e-153	434	COG0572@1|root,KOG4203@2759|Eukaryota,38HIZ@33154|Opisthokonta,3NUU8@4751|Fungi,3QKQZ@4890|Ascomycota,20D5J@147545|Eurotiomycetes,3B1C3@33183|Onygenales,3FS9Z@34384|Arthrodermataceae	4751|Fungi	TZ	Uracil phosphoribosyltransferase	FUR1	GO:0003674,GO:0003824,GO:0004845,GO:0004849,GO:0005575,GO:0005622,GO:0005623,GO:0005737,GO:0005829,GO:0006139,GO:0006206,GO:0006213,GO:0006220,GO:0006221,GO:0006222,GO:0006725,GO:0006753,GO:0006793,GO:0006796,GO:0006807,GO:0008150,GO:0008152,GO:0008655,GO:0009058,GO:0009112,GO:0009116,GO:0009117,GO:0009119,GO:0009123,GO:0009124,GO:0009129,GO:0009130,GO:0009156,GO:0009161,GO:0009163,GO:0009165,GO:…	2.4.2.9	ko:K00761	ko00240,ko01100,map00240,map01100	-	R00966	RC00063	ko00000,ko00001,ko01000	-	-	-	UPRTase	IPR029057	Phosphoribosyltransferase-like	2	1	1	1	1	1	1	1	1	1	1	1	1	1	1	2	2	1	1	1	1	1	1	1	1	1	1
OG0001802	63418.F2Q1M4	4.73e-170	477	COG0036@1|root,KOG3111@2759|Eukaryota,38G6J@33154|Opisthokonta,3NX48@4751|Fungi,3QPZ3@4890|Ascomycota,20D0E@147545|Eurotiomycetes,3B1IS@33183|Onygenales,3FTUB@34384|Arthrodermataceae	4751|Fungi	G	Belongs to the ribulose-phosphate 3-epimerase family	RPE1	GO:0003674,GO:0003824,GO:0004750,GO:0005488,GO:0005575,GO:0005622,GO:0005623,GO:0005737,GO:0005829,GO:0005975,GO:0005996,GO:0006081,GO:0006098,GO:0006139,GO:0006725,GO:0006732,GO:0006733,GO:0006739,GO:0006753,GO:0006793,GO:0006796,GO:0006807,GO:0008150,GO:0008152,GO:0009052,GO:0009056,GO:0009117,GO:0009987,GO:0016052,GO:0016853,GO:0016854,GO:0016857,GO:0019321,GO:0019323,GO:0019362,GO:0019637,GO:…	5.1.3.1	ko:K01783	ko00030,ko00040,ko00710,ko01100,ko01110,ko01120,ko01130,ko01200,ko01230,map00030,map00040,map00710,map01100,map01110,map01120,map01130,map01200,map01230	M00004,M00007	R01529	RC00540	ko00000,ko00001,ko00002,ko01000	-	-	-	Ribul_P_3_epim	IPR000056	Ribulose-phosphate 3-epimerase-like	1	1	1	1	1	1	1	1	1	1	1	1	2	1	1	2	2	1	1	1	1	1	1	1	1	1	1
OG0001802	63418.F2Q1M4	4.73e-170	477	COG0036@1|root,KOG3111@2759|Eukaryota,38G6J@33154|Opisthokonta,3NX48@4751|Fungi,3QPZ3@4890|Ascomycota,20D0E@147545|Eurotiomycetes,3B1IS@33183|Onygenales,3FTUB@34384|Arthrodermataceae	4751|Fungi	G	Belongs to the ribulose-phosphate 3-epimerase family	RPE1	GO:0003674,GO:0003824,GO:0004750,GO:0005488,GO:0005575,GO:0005622,GO:0005623,GO:0005737,GO:0005829,GO:0005975,GO:0005996,GO:0006081,GO:0006098,GO:0006139,GO:0006725,GO:0006732,GO:0006733,GO:0006739,GO:0006753,GO:0006793,GO:0006796,GO:0006807,GO:0008150,GO:0008152,GO:0009052,GO:0009056,GO:0009117,GO:0009987,GO:0016052,GO:0016853,GO:0016854,GO:0016857,GO:0019321,GO:0019323,GO:0019362,GO:0019637,GO:…	5.1.3.1	ko:K01783	ko00030,ko00040,ko00710,ko01100,ko01110,ko01120,ko01130,ko01200,ko01230,map00030,map00040,map00710,map01100,map01110,map01120,map01130,map01200,map01230	M00004,M00007	R01529	RC00540	ko00000,ko00001,ko00002,ko01000	-	-	-	Ribul_P_3_epim	IPR011060	Ribulose-phosphate binding barrel	1	1	1	1	1	1	1	1	1	1	1	1	2	1	1	2	2	1	1	1	1	1	1	1	1	1	1
OG0001814	82508.K1VSJ4	0	1276	KOG2515@1|root,KOG2515@2759|Eukaryota,38CWJ@33154|Opisthokonta,3NV47@4751|Fungi,3UYKJ@5204|Basidiomycota,3VCTN@5234|Tremellales	4751|Fungi	G	Alg9-like mannosyltransferase family	ALG9	GO:0000030,GO:0003674,GO:0003824,GO:0004376,GO:0005575,GO:0005622,GO:0005623,GO:0005737,GO:0005783,GO:0005789,GO:0006464,GO:0006486,GO:0006487,GO:0006488,GO:0006490,GO:0006629,GO:0006807,GO:0008150,GO:0008152,GO:0009058,GO:0009059,GO:0009100,GO:0009101,GO:0009987,GO:0012505,GO:0016020,GO:0016021,GO:0016740,GO:0016757,GO:0016758,GO:0019538,GO:0030176,GO:0031224,GO:0031227,GO:0031984,GO:0034645,GO:…	2.4.1.259,2.4.1.261	ko:K03846	ko00510,ko00513,ko01100,map00510,map00513,map01100	M00055	R06259,R06261	-	ko00000,ko00001,ko00002,ko01000,ko01003	-	GT22	-	Glyco_transf_22	IPR005599	GPI mannosyltransferase	1	1	0	0	1	1	1	1	1	1	2	1	2	1	1	2	2	1	1	1	1	1	1	1	1	1	1
OG0001997	34349.G7E2Q7	7.44e-76	270	KOG1771@1|root,KOG1771@2759|Eukaryota,38BUT@33154|Opisthokonta,3NV7H@4751|Fungi,3UZPI@5204|Basidiomycota,2YCU2@29000|Pucciniomycotina	4751|Fungi	G	Alg9-like mannosyltransferase family	GPI10	GO:0000030,GO:0003674,GO:0003824,GO:0004584,GO:0005488,GO:0005575,GO:0005622,GO:0005623,GO:0005737,GO:0005783,GO:0005789,GO:0006464,GO:0006497,GO:0006505,GO:0006506,GO:0006629,GO:0006643,GO:0006644,GO:0006650,GO:0006661,GO:0006664,GO:0006793,GO:0006796,GO:0006807,GO:0008150,GO:0008152,GO:0008610,GO:0008654,GO:0009058,GO:0009059,GO:0009247,GO:0009987,GO:0012505,GO:0016020,GO:0016021,GO:0016740,GO:…	-	ko:K05286	ko00563,ko01100,map00563,map01100	M00065	R05922	-	ko00000,ko00001,ko00002,ko01000,ko01003	-	GT22	-	Glyco_transf_22	IPR011008	Dimeric alpha-beta barrel	1	1	1	1	1	1	2	1	1	1	2	1	2	1	1	2	2	0	0	0	1	1	1	1	1	1	1
OG0001997	34349.G7E2Q7	7.44e-76	270	KOG1771@1|root,KOG1771@2759|Eukaryota,38BUT@33154|Opisthokonta,3NV7H@4751|Fungi,3UZPI@5204|Basidiomycota,2YCU2@29000|Pucciniomycotina	4751|Fungi	G	Alg9-like mannosyltransferase family	GPI10	GO:0000030,GO:0003674,GO:0003824,GO:0004584,GO:0005488,GO:0005575,GO:0005622,GO:0005623,GO:0005737,GO:0005783,GO:0005789,GO:0006464,GO:0006497,GO:0006505,GO:0006506,GO:0006629,GO:0006643,GO:0006644,GO:0006650,GO:0006661,GO:0006664,GO:0006793,GO:0006796,GO:0006807,GO:0008150,GO:0008152,GO:0008610,GO:0008654,GO:0009058,GO:0009059,GO:0009247,GO:0009987,GO:0012505,GO:0016020,GO:0016021,GO:0016740,GO:…	-	ko:K05286	ko00563,ko01100,map00563,map01100	M00065	R05922	-	ko00000,ko00001,ko00002,ko01000,ko01003	-	GT22	-	Glyco_transf_22	IPR005599	GPI mannosyltransferase	1	1	1	1	1	1	2	1	1	1	2	1	2	1	1	2	2	0	0	0	1	1	1	1	1	1	1
OG0002008	82508.K1WTU2	1.94e-257	738	KOG2516@1|root,KOG2516@2759|Eukaryota,38BVA@33154|Opisthokonta,3NYGI@4751|Fungi,3V0FZ@5204|Basidiomycota,3VDFX@5234|Tremellales	4751|Fungi	G	Alg9-like mannosyltransferase family	ECM39	GO:0000009,GO:0000030,GO:0003674,GO:0003824,GO:0005575,GO:0005622,GO:0005623,GO:0005737,GO:0005783,GO:0006464,GO:0006486,GO:0006487,GO:0006488,GO:0006490,GO:0006629,GO:0006807,GO:0008150,GO:0008152,GO:0009058,GO:0009059,GO:0009100,GO:0009101,GO:0009987,GO:0012505,GO:0016020,GO:0016021,GO:0016740,GO:0016757,GO:0016758,GO:0019538,GO:0031224,GO:0034645,GO:0036211,GO:0043170,GO:0043226,GO:0043227,GO:…	2.4.1.260	ko:K03847	ko00510,ko00513,ko01100,map00510,map00513,map01100	M00055	R06260	-	ko00000,ko00001,ko00002,ko01000,ko01003	-	GT22	-	Glyco_transf_22			1	1	1	1	1	1	1	1	1	1	2	1	2	1	1	2	1	0	0	0	1	1	1	1	2	1	1
OG0002113	4909.A0A099P155	0	2222	KOG2161@1|root,KOG2504@1|root,KOG2161@2759|Eukaryota,KOG2504@2759|Eukaryota,38CWF@33154|Opisthokonta,3NVNE@4751|Fungi,3QN3K@4890|Ascomycota,3RRGN@4891|Saccharomycetes	4751|Fungi	G	to Saccharomyces cerevisiae CWH41 (YGL027C)	CWH41	GO:0000271,GO:0000322,GO:0000323,GO:0000324,GO:0003674,GO:0003824,GO:0004553,GO:0004573,GO:0005575,GO:0005622,GO:0005623,GO:0005737,GO:0005773,GO:0005783,GO:0005789,GO:0005975,GO:0005976,GO:0006073,GO:0006464,GO:0006486,GO:0006487,GO:0006807,GO:0008150,GO:0008152,GO:0009058,GO:0009059,GO:0009100,GO:0009101,GO:0009250,GO:0009272,GO:0009987,GO:0010383,GO:0012505,GO:0015926,GO:0016020,GO:0016051,GO:…	3.2.1.106	ko:K01228	ko00510,ko01100,ko04141,map00510,map01100,map04141	M00073	R05979	-	ko00000,ko00001,ko00002,ko01000,ko04147	-	-	-	Glyco_hydro_63,Glyco_hydro_63N	IPR036259	MFS transporter superfamily	1	0	1	1	1	1	2	1	1	1	2	1	2	1	1	2	2	1	1	1	1	1	1	1	1	1	1
OG0002113	4909.A0A099P155	0	2222	KOG2161@1|root,KOG2504@1|root,KOG2161@2759|Eukaryota,KOG2504@2759|Eukaryota,38CWF@33154|Opisthokonta,3NVNE@4751|Fungi,3QN3K@4890|Ascomycota,3RRGN@4891|Saccharomycetes	4751|Fungi	G	to Saccharomyces cerevisiae CWH41 (YGL027C)	CWH41	GO:0000271,GO:0000322,GO:0000323,GO:0000324,GO:0003674,GO:0003824,GO:0004553,GO:0004573,GO:0005575,GO:0005622,GO:0005623,GO:0005737,GO:0005773,GO:0005783,GO:0005789,GO:0005975,GO:0005976,GO:0006073,GO:0006464,GO:0006486,GO:0006487,GO:0006807,GO:0008150,GO:0008152,GO:0009058,GO:0009059,GO:0009100,GO:0009101,GO:0009250,GO:0009272,GO:0009987,GO:0010383,GO:0012505,GO:0015926,GO:0016020,GO:0016051,GO:…	3.2.1.106	ko:K01228	ko00510,ko01100,ko04141,map00510,map01100,map04141	M00073	R05979	-	ko00000,ko00001,ko00002,ko01000,ko04147	-	-	-	Glyco_hydro_63,Glyco_hydro_63N	IPR004888	Glycoside hydrolase family 63	1	0	1	1	1	1	2	1	1	1	2	1	2	1	1	2	2	1	1	1	1	1	1	1	1	1	1
OG0002113	4909.A0A099P155	0	2222	KOG2161@1|root,KOG2504@1|root,KOG2161@2759|Eukaryota,KOG2504@2759|Eukaryota,38CWF@33154|Opisthokonta,3NVNE@4751|Fungi,3QN3K@4890|Ascomycota,3RRGN@4891|Saccharomycetes	4751|Fungi	G	to Saccharomyces cerevisiae CWH41 (YGL027C)	CWH41	GO:0000271,GO:0000322,GO:0000323,GO:0000324,GO:0003674,GO:0003824,GO:0004553,GO:0004573,GO:0005575,GO:0005622,GO:0005623,GO:0005737,GO:0005773,GO:0005783,GO:0005789,GO:0005975,GO:0005976,GO:0006073,GO:0006464,GO:0006486,GO:0006487,GO:0006807,GO:0008150,GO:0008152,GO:0009058,GO:0009059,GO:0009100,GO:0009101,GO:0009250,GO:0009272,GO:0009987,GO:0010383,GO:0012505,GO:0015926,GO:0016020,GO:0016051,GO:…	3.2.1.106	ko:K01228	ko00510,ko01100,ko04141,map00510,map01100,map04141	M00073	R05979	-	ko00000,ko00001,ko00002,ko01000,ko04147	-	-	-	Glyco_hydro_63,Glyco_hydro_63N	IPR008928	Six-hairpin glycosidase superfamily	1	0	1	1	1	1	2	1	1	1	2	1	2	1	1	2	2	1	1	1	1	1	1	1	1	1	1
OG0002128	273371.XP_003869670.1	5.54e-243	668	COG0005@1|root,KOG3985@2759|Eukaryota,38GVK@33154|Opisthokonta,3NV1I@4751|Fungi,3QMKP@4890|Ascomycota,3RR9R@4891|Saccharomycetes,47C91@766764|Debaryomycetaceae	4751|Fungi	F	Catalyzes the reversible phosphorylation of S-methyl-5'- thioadenosine (MTA) to adenine and 5-methylthioribose-1-phosphate. Involved in the breakdown of MTA, a major by-product of polyamine biosynthesis. Responsible for the first step in the methionine salvage pathway after MTA has been generated from S- adenosylmethionine. Has broad substrate specificity with 6- aminopurine nucleosides as prefer…	MEU1	GO:0000096,GO:0000097,GO:0003674,GO:0003676,GO:0003723,GO:0003729,GO:0003824,GO:0004731,GO:0005488,GO:0005575,GO:0005576,GO:0005622,GO:0005623,GO:0005737,GO:0006082,GO:0006520,GO:0006536,GO:0006537,GO:0006555,GO:0006790,GO:0006807,GO:0008150,GO:0008152,GO:0008652,GO:0009058,GO:0009064,GO:0009066,GO:0009067,GO:0009084,GO:0009086,GO:0009987,GO:0016053,GO:0016740,GO:0016757,GO:0016763,GO:0017061,GO:…	2.4.2.28	ko:K00772	ko00270,ko01100,map00270,map01100	M00034	R01402	RC00063,RC02819	ko00000,ko00001,ko00002,ko01000	-	-	-	PNP_UDP_1	IPR035994	Nucleoside phosphorylase superfamily	1	1	1	1	1	1	1	1	1	1	0	0	1	1	1	2	1	1	1	1	1	1	1	1	1	1	1
OG0002128	273371.XP_003869670.1	5.54e-243	668	COG0005@1|root,KOG3985@2759|Eukaryota,38GVK@33154|Opisthokonta,3NV1I@4751|Fungi,3QMKP@4890|Ascomycota,3RR9R@4891|Saccharomycetes,47C91@766764|Debaryomycetaceae	4751|Fungi	F	Catalyzes the reversible phosphorylation of S-methyl-5'- thioadenosine (MTA) to adenine and 5-methylthioribose-1-phosphate. Involved in the breakdown of MTA, a major by-product of polyamine biosynthesis. Responsible for the first step in the methionine salvage pathway after MTA has been generated from S- adenosylmethionine. Has broad substrate specificity with 6- aminopurine nucleosides as prefer…	MEU1	GO:0000096,GO:0000097,GO:0003674,GO:0003676,GO:0003723,GO:0003729,GO:0003824,GO:0004731,GO:0005488,GO:0005575,GO:0005576,GO:0005622,GO:0005623,GO:0005737,GO:0006082,GO:0006520,GO:0006536,GO:0006537,GO:0006555,GO:0006790,GO:0006807,GO:0008150,GO:0008152,GO:0008652,GO:0009058,GO:0009064,GO:0009066,GO:0009067,GO:0009084,GO:0009086,GO:0009987,GO:0016053,GO:0016740,GO:0016757,GO:0016763,GO:0017061,GO:…	2.4.2.28	ko:K00772	ko00270,ko01100,map00270,map01100	M00034	R01402	RC00063,RC02819	ko00000,ko00001,ko00002,ko01000	-	-	-	PNP_UDP_1	IPR010044	Methylthioadenosine phosphorylase (MTAP)	1	1	1	1	1	1	1	1	1	1	0	0	1	1	1	2	1	1	1	1	1	1	1	1	1	1	1
OG0002128	273371.XP_003869670.1	5.54e-243	668	COG0005@1|root,KOG3985@2759|Eukaryota,38GVK@33154|Opisthokonta,3NV1I@4751|Fungi,3QMKP@4890|Ascomycota,3RR9R@4891|Saccharomycetes,47C91@766764|Debaryomycetaceae	4751|Fungi	F	Catalyzes the reversible phosphorylation of S-methyl-5'- thioadenosine (MTA) to adenine and 5-methylthioribose-1-phosphate. Involved in the breakdown of MTA, a major by-product of polyamine biosynthesis. Responsible for the first step in the methionine salvage pathway after MTA has been generated from S- adenosylmethionine. Has broad substrate specificity with 6- aminopurine nucleosides as prefer…	MEU1	GO:0000096,GO:0000097,GO:0003674,GO:0003676,GO:0003723,GO:0003729,GO:0003824,GO:0004731,GO:0005488,GO:0005575,GO:0005576,GO:0005622,GO:0005623,GO:0005737,GO:0006082,GO:0006520,GO:0006536,GO:0006537,GO:0006555,GO:0006790,GO:0006807,GO:0008150,GO:0008152,GO:0008652,GO:0009058,GO:0009064,GO:0009066,GO:0009067,GO:0009084,GO:0009086,GO:0009987,GO:0016053,GO:0016740,GO:0016757,GO:0016763,GO:0017061,GO:…	2.4.2.28	ko:K00772	ko00270,ko01100,map00270,map01100	M00034	R01402	RC00063,RC02819	ko00000,ko00001,ko00002,ko01000	-	-	-	PNP_UDP_1	IPR010044	Methylthioadenosine phosphorylase (MTAP)	1	1	1	1	1	1	1	1	1	1	0	0	1	1	1	2	1	1	1	1	1	1	1	1	1	1	1
OG0002160	84751.XP_007879353.1	3.25e-126	389	KOG3893@1|root,KOG3893@2759|Eukaryota,38CA7@33154|Opisthokonta,3NU0H@4751|Fungi,3UXX4@5204|Basidiomycota,3N1NT@452284|Ustilaginomycotina	4751|Fungi	G	Mannosyltransferase (PIG-M)	GPI14	GO:0000030,GO:0003674,GO:0003824,GO:0005575,GO:0005622,GO:0005623,GO:0005737,GO:0005783,GO:0005789,GO:0006464,GO:0006497,GO:0006505,GO:0006506,GO:0006629,GO:0006643,GO:0006644,GO:0006650,GO:0006661,GO:0006664,GO:0006793,GO:0006796,GO:0006807,GO:0008150,GO:0008152,GO:0008610,GO:0008654,GO:0009058,GO:0009059,GO:0009247,GO:0009987,GO:0012505,GO:0016020,GO:0016021,GO:0016043,GO:0016740,GO:0016757,GO:…	-	ko:K05284	ko00563,ko01100,map00563,map01100	M00065	R05919	-	ko00000,ko00001,ko00002,ko01000,ko01003	-	GT50	-	Mannosyl_trans	IPR007704	GPI mannosyltransferase 1	1	1	2	1	1	1	1	1	1	1	0	1	1	1	1	2	2	1	1	1	1	1	1	1	1	1	1
OG0002265	63400.XP_003014617.1	0	2963	COG3408@1|root,KOG3625@2759|Eukaryota,38BRH@33154|Opisthokonta,3NU7F@4751|Fungi,3QMYJ@4890|Ascomycota,20EFR@147545|Eurotiomycetes,3B0ZR@33183|Onygenales,3FVRA@34384|Arthrodermataceae	4751|Fungi	G	Glycogen debranching enzyme	GDB1	GO:0000272,GO:0003674,GO:0003824,GO:0004133,GO:0004134,GO:0004135,GO:0004553,GO:0005575,GO:0005622,GO:0005623,GO:0005737,GO:0005739,GO:0005975,GO:0005976,GO:0005977,GO:0005980,GO:0006073,GO:0006091,GO:0006112,GO:0008150,GO:0008152,GO:0009056,GO:0009057,GO:0009251,GO:0009987,GO:0015926,GO:0015980,GO:0016052,GO:0016740,GO:0016757,GO:0016758,GO:0016787,GO:0016798,GO:0043170,GO:0043226,GO:0043227,GO:…	2.4.1.25,3.2.1.33	ko:K01196	ko00500,ko01100,ko01110,map00500,map01100,map01110	-	R02109,R02111	RC00049	ko00000,ko00001,ko01000	-	GH13	-	GDE_C,hDGE_amylase,hGDE_N,hGDE_central	IPR017853	Glycoside hydrolase superfamily	2	2	1	1	1	1	4	1	1	1	3	1	2	0	0	0	0	0	0	0	0	0	1	1	1	1	2
OG0002265	63400.XP_003014617.1	0	2963	COG3408@1|root,KOG3625@2759|Eukaryota,38BRH@33154|Opisthokonta,3NU7F@4751|Fungi,3QMYJ@4890|Ascomycota,20EFR@147545|Eurotiomycetes,3B0ZR@33183|Onygenales,3FVRA@34384|Arthrodermataceae	4751|Fungi	G	Glycogen debranching enzyme	GDB1	GO:0000272,GO:0003674,GO:0003824,GO:0004133,GO:0004134,GO:0004135,GO:0004553,GO:0005575,GO:0005622,GO:0005623,GO:0005737,GO:0005739,GO:0005975,GO:0005976,GO:0005977,GO:0005980,GO:0006073,GO:0006091,GO:0006112,GO:0008150,GO:0008152,GO:0009056,GO:0009057,GO:0009251,GO:0009987,GO:0015926,GO:0015980,GO:0016052,GO:0016740,GO:0016757,GO:0016758,GO:0016787,GO:0016798,GO:0043170,GO:0043226,GO:0043227,GO:…	2.4.1.25,3.2.1.33	ko:K01196	ko00500,ko01100,ko01110,map00500,map01100,map01110	-	R02109,R02111	RC00049	ko00000,ko00001,ko01000	-	GH13	-	GDE_C,hDGE_amylase,hGDE_N,hGDE_central	IPR008928	Six-hairpin glycosidase superfamily	2	2	1	1	1	1	4	1	1	1	3	1	2	0	0	0	0	0	0	0	0	0	1	1	1	1	2
OG0002265	63400.XP_003014617.1	0	2963	COG3408@1|root,KOG3625@2759|Eukaryota,38BRH@33154|Opisthokonta,3NU7F@4751|Fungi,3QMYJ@4890|Ascomycota,20EFR@147545|Eurotiomycetes,3B0ZR@33183|Onygenales,3FVRA@34384|Arthrodermataceae	4751|Fungi	G	Glycogen debranching enzyme	GDB1	GO:0000272,GO:0003674,GO:0003824,GO:0004133,GO:0004134,GO:0004135,GO:0004553,GO:0005575,GO:0005622,GO:0005623,GO:0005737,GO:0005739,GO:0005975,GO:0005976,GO:0005977,GO:0005980,GO:0006073,GO:0006091,GO:0006112,GO:0008150,GO:0008152,GO:0009056,GO:0009057,GO:0009251,GO:0009987,GO:0015926,GO:0015980,GO:0016052,GO:0016740,GO:0016757,GO:0016758,GO:0016787,GO:0016798,GO:0043170,GO:0043226,GO:0043227,GO:…	2.4.1.25,3.2.1.33	ko:K01196	ko00500,ko01100,ko01110,map00500,map01100,map01110	-	R02109,R02111	RC00049	ko00000,ko00001,ko01000	-	GH13	-	GDE_C,hDGE_amylase,hGDE_N,hGDE_central	IPR010401	Glycogen debranching enzyme	2	2	1	1	1	1	4	1	1	1	3	1	2	0	0	0	0	0	0	0	0	0	1	1	1	1	2
OG0002288	84751.XP_007878940.1	6.74e-161	553	COG0438@1|root,COG5543@1|root,KOG1111@2759|Eukaryota,KOG1810@2759|Eukaryota,38ENZ@33154|Opisthokonta,3NWSA@4751|Fungi,3UZY2@5204|Basidiomycota,3N601@452284|Ustilaginomycotina	4751|Fungi	DIMO	PIGA (GPI anchor biosynthesis)	SPT14	GO:0000506,GO:0003674,GO:0003824,GO:0005575,GO:0005622,GO:0005623,GO:0005737,GO:0005783,GO:0005789,GO:0005829,GO:0006464,GO:0006497,GO:0006505,GO:0006506,GO:0006629,GO:0006643,GO:0006644,GO:0006650,GO:0006661,GO:0006664,GO:0006793,GO:0006796,GO:0006807,GO:0008150,GO:0008152,GO:0008194,GO:0008375,GO:0008610,GO:0008654,GO:0009058,GO:0009059,GO:0009247,GO:0009987,GO:0012505,GO:0016020,GO:0016740,GO:…	2.4.1.198	ko:K03857	ko00563,ko01100,map00563,map01100	M00065	R05916	-	ko00000,ko00001,ko00002,ko01000,ko01003	-	GT4	-	Glycos_transf_1,PIGA	IPR016024	Armadillo-type fold	1	1	1	1	1	1	1	1	1	1	0	1	1	1	1	1	1	1	1	1	1	1	1	1	1	1	1
OG0002340	72558.CBQ71131	3.76e-258	791	COG1877@1|root,KOG1050@2759|Eukaryota,38CEK@33154|Opisthokonta,3NU3V@4751|Fungi,3V3VG@5204|Basidiomycota,3N0A9@452284|Ustilaginomycotina	4751|Fungi	G	Trehalose-phosphatase	TPS3	GO:0003674,GO:0003824,GO:0003825,GO:0005575,GO:0005622,GO:0005623,GO:0005737,GO:0005946,GO:0005975,GO:0005984,GO:0005991,GO:0005992,GO:0006793,GO:0006796,GO:0006950,GO:0008150,GO:0008152,GO:0008194,GO:0009058,GO:0009311,GO:0009312,GO:0009987,GO:0016051,GO:0016311,GO:0016740,GO:0016757,GO:0016758,GO:0016787,GO:0016788,GO:0016791,GO:0030234,GO:0032991,GO:0033554,GO:0034637,GO:0035251,GO:0042578,GO:…	2.4.1.15,2.4.1.347,3.1.3.12	ko:K00697,ko:K16055,ko:K22337	ko00500,ko01100,map00500,map01100	-	R02737,R02778	RC00005,RC00017,RC00049,RC02748	ko00000,ko00001,ko01000,ko01003	-	GT20	iMM904.YMR261C,iND750.YMR261C	Glyco_transf_20,Trehalose_PPase	IPR036412	HAD-like superfamily	0	1	1	0	1	1	1	1	1	1	2	1	2	1	1	2	1	1	1	1	1	1	1	1	1	1	1
OG0002340	72558.CBQ71131	3.76e-258	791	COG1877@1|root,KOG1050@2759|Eukaryota,38CEK@33154|Opisthokonta,3NU3V@4751|Fungi,3V3VG@5204|Basidiomycota,3N0A9@452284|Ustilaginomycotina	4751|Fungi	G	Trehalose-phosphatase	TPS3	GO:0003674,GO:0003824,GO:0003825,GO:0005575,GO:0005622,GO:0005623,GO:0005737,GO:0005946,GO:0005975,GO:0005984,GO:0005991,GO:0005992,GO:0006793,GO:0006796,GO:0006950,GO:0008150,GO:0008152,GO:0008194,GO:0009058,GO:0009311,GO:0009312,GO:0009987,GO:0016051,GO:0016311,GO:0016740,GO:0016757,GO:0016758,GO:0016787,GO:0016788,GO:0016791,GO:0030234,GO:0032991,GO:0033554,GO:0034637,GO:0035251,GO:0042578,GO:…	2.4.1.15,2.4.1.347,3.1.3.12	ko:K00697,ko:K16055,ko:K22337	ko00500,ko01100,map00500,map01100	-	R02737,R02778	RC00005,RC00017,RC00049,RC02748	ko00000,ko00001,ko01000,ko01003	-	GT20	iMM904.YMR261C,iND750.YMR261C	Glyco_transf_20,Trehalose_PPase	IPR011009	Protein kinase-like domain superfamily	0	1	1	0	1	1	1	1	1	1	2	1	2	1	1	2	1	1	1	1	1	1	1	1	1	1	1
OG0002340	72558.CBQ71131	3.76e-258	791	COG1877@1|root,KOG1050@2759|Eukaryota,38CEK@33154|Opisthokonta,3NU3V@4751|Fungi,3V3VG@5204|Basidiomycota,3N0A9@452284|Ustilaginomycotina	4751|Fungi	G	Trehalose-phosphatase	TPS3	GO:0003674,GO:0003824,GO:0003825,GO:0005575,GO:0005622,GO:0005623,GO:0005737,GO:0005946,GO:0005975,GO:0005984,GO:0005991,GO:0005992,GO:0006793,GO:0006796,GO:0006950,GO:0008150,GO:0008152,GO:0008194,GO:0009058,GO:0009311,GO:0009312,GO:0009987,GO:0016051,GO:0016311,GO:0016740,GO:0016757,GO:0016758,GO:0016787,GO:0016788,GO:0016791,GO:0030234,GO:0032991,GO:0033554,GO:0034637,GO:0035251,GO:0042578,GO:…	2.4.1.15,2.4.1.347,3.1.3.12	ko:K00697,ko:K16055,ko:K22337	ko00500,ko01100,map00500,map01100	-	R02737,R02778	RC00005,RC00017,RC00049,RC02748	ko00000,ko00001,ko01000,ko01003	-	GT20	iMM904.YMR261C,iND750.YMR261C	Glyco_transf_20,Trehalose_PPase	IPR001830	Glycosyl transferase, family 20	0	1	1	0	1	1	1	1	1	1	2	1	2	1	1	2	1	1	1	1	1	1	1	1	1	1	1
OG0002351	82508.K1WL46	2.68e-155	456	COG3772@1|root,2S6UW@2759|Eukaryota,3A2UF@33154|Opisthokonta,3P2E0@4751|Fungi,3V5T8@5204|Basidiomycota	4751|Fungi	O	lysozyme	-	-	3.2.1.17	ko:K01185	-	-	-	-	ko00000,ko01000	-	-	-	Phage_lysozyme,SH3_3	IPR051018	Bacteriophage Glycosyl Hydrolase 24	0	0	0	0	0	0	0	1	1	1	0	0	0	0	0	0	0	0	0	0	0	0	2	2	2	2	2
OG0002351	82508.K1WL46	2.68e-155	456	COG3772@1|root,2S6UW@2759|Eukaryota,3A2UF@33154|Opisthokonta,3P2E0@4751|Fungi,3V5T8@5204|Basidiomycota	4751|Fungi	O	lysozyme	-	-	3.2.1.17	ko:K01185	-	-	-	-	ko00000,ko01000	-	-	-	Phage_lysozyme,SH3_3	IPR034690	Endolysin T4 type	0	0	0	0	0	0	0	1	1	1	0	0	0	0	0	0	0	0	0	0	0	0	2	2	2	2	2
OG0002351	82508.K1WL46	2.68e-155	456	COG3772@1|root,2S6UW@2759|Eukaryota,3A2UF@33154|Opisthokonta,3P2E0@4751|Fungi,3V5T8@5204|Basidiomycota	4751|Fungi	O	lysozyme	-	-	3.2.1.17	ko:K01185	-	-	-	-	ko00000,ko01000	-	-	-	Phage_lysozyme,SH3_3	IPR023346	Lysozyme-like domain superfamily	0	0	0	0	0	0	0	1	1	1	0	0	0	0	0	0	0	0	0	0	0	0	2	2	2	2	2
OG0002491	84751.XP_007878012.1	1.7e-115	354	COG0463@1|root,KOG2977@2759|Eukaryota,38DUD@33154|Opisthokonta,3NTZC@4751|Fungi,3V0EF@5204|Basidiomycota,3N1VK@452284|Ustilaginomycotina	4751|Fungi	M	Glycosyl transferase family 2	ALG5	GO:0003674,GO:0003824,GO:0004581,GO:0005575,GO:0005622,GO:0005623,GO:0005737,GO:0005783,GO:0005789,GO:0006464,GO:0006486,GO:0006487,GO:0006488,GO:0006490,GO:0006629,GO:0006807,GO:0008150,GO:0008152,GO:0008194,GO:0009058,GO:0009059,GO:0009100,GO:0009101,GO:0009987,GO:0012505,GO:0016020,GO:0016021,GO:0016740,GO:0016757,GO:0016758,GO:0018193,GO:0018196,GO:0018279,GO:0019538,GO:0030176,GO:0031224,GO:…	2.4.1.117	ko:K00729	ko00510,ko01100,map00510,map01100	M00055	R01005	RC00005	ko00000,ko00001,ko00002,ko01000,ko01003	-	GT2	-	Glycos_transf_2	IPR029044	Nucleotide-diphospho-sugar transferases	1	1	1	1	1	1	1	1	1	1	2	1	2	1	1	1	1	1	1	1	1	1	1	1	1	1	1
OG0002507	72558.CBQ72886	1.54e-183	568	KOG2575@1|root,KOG2575@2759|Eukaryota,38F87@33154|Opisthokonta,3NVFW@4751|Fungi,3UZ4B@5204|Basidiomycota,3MZS2@452284|Ustilaginomycotina	4751|Fungi	EG	ALG6, ALG8 glycosyltransferase family	ALG6	GO:0003674,GO:0003824,GO:0005575,GO:0005622,GO:0005623,GO:0005737,GO:0005783,GO:0005789,GO:0006091,GO:0006464,GO:0006486,GO:0006487,GO:0006488,GO:0006490,GO:0006629,GO:0006807,GO:0008150,GO:0008152,GO:0009058,GO:0009059,GO:0009060,GO:0009100,GO:0009101,GO:0009987,GO:0012505,GO:0015980,GO:0016020,GO:0016021,GO:0016740,GO:0016757,GO:0016758,GO:0018193,GO:0018196,GO:0018279,GO:0019538,GO:0031224,GO:…	2.4.1.267	ko:K03848	ko00510,ko01100,map00510,map01100	M00055	R06262	-	ko00000,ko00001,ko00002,ko01000,ko01003	-	GT57	-	Alg6_Alg8	IPR004856	Glycosyl transferase, ALG6/ALG8	1	1	1	1	1	1	1	1	1	1	1	1	2	1	1	2	2	1	1	1	1	1	1	1	1	1	1
OG0002546	4909.A0A099P643	0	2523	COG0323@1|root,COG0438@1|root,COG0665@1|root,KOG1977@2759|Eukaryota,KOG3742@2759|Eukaryota,KOG3923@2759|Eukaryota,38BSH@33154|Opisthokonta,3NU8X@4751|Fungi,3QNRC@4890|Ascomycota,3RT7Z@4891|Saccharomycetes	4751|Fungi	H	Transfers the glycosyl residue from UDP-Glc to the non- reducing end of alpha-1,4-glucan	GSY1	GO:0000271,GO:0003674,GO:0003824,GO:0004373,GO:0005575,GO:0005622,GO:0005623,GO:0005634,GO:0005737,GO:0005739,GO:0005975,GO:0005976,GO:0005977,GO:0005978,GO:0006073,GO:0006091,GO:0006112,GO:0008150,GO:0008152,GO:0008194,GO:0009058,GO:0009059,GO:0009250,GO:0009987,GO:0015980,GO:0016051,GO:0016740,GO:0016757,GO:0016758,GO:0033692,GO:0034637,GO:0034645,GO:0035251,GO:0043170,GO:0043226,GO:0043227,GO:…	2.4.1.11	ko:K00693	ko00500,ko01100,ko04151,ko04152,ko04910,ko04922,ko04931,map00500,map01100,map04151,map04152,map04910,map04922,map04931	-	R00292	RC00005	ko00000,ko00001,ko01000,ko01003	-	GT3	-	Glycogen_syn	IPR036890	Histidine kinase/HSP90-like ATPase superfamily	1	1	1	1	1	1	1	1	1	1	2	1	2	0	0	0	0	0	0	0	0	0	1	1	1	1	1
OG0002546	4909.A0A099P643	0	2523	COG0323@1|root,COG0438@1|root,COG0665@1|root,KOG1977@2759|Eukaryota,KOG3742@2759|Eukaryota,KOG3923@2759|Eukaryota,38BSH@33154|Opisthokonta,3NU8X@4751|Fungi,3QNRC@4890|Ascomycota,3RT7Z@4891|Saccharomycetes	4751|Fungi	H	Transfers the glycosyl residue from UDP-Glc to the non- reducing end of alpha-1,4-glucan	GSY1	GO:0000271,GO:0003674,GO:0003824,GO:0004373,GO:0005575,GO:0005622,GO:0005623,GO:0005634,GO:0005737,GO:0005739,GO:0005975,GO:0005976,GO:0005977,GO:0005978,GO:0006073,GO:0006091,GO:0006112,GO:0008150,GO:0008152,GO:0008194,GO:0009058,GO:0009059,GO:0009250,GO:0009987,GO:0015980,GO:0016051,GO:0016740,GO:0016757,GO:0016758,GO:0033692,GO:0034637,GO:0034645,GO:0035251,GO:0043170,GO:0043226,GO:0043227,GO:…	2.4.1.11	ko:K00693	ko00500,ko01100,ko04151,ko04152,ko04910,ko04922,ko04931,map00500,map01100,map04151,map04152,map04910,map04922,map04931	-	R00292	RC00005	ko00000,ko00001,ko01000,ko01003	-	GT3	-	Glycogen_syn	IPR008631	Glycogen synthase	1	1	1	1	1	1	1	1	1	1	2	1	2	0	0	0	0	0	0	0	0	0	1	1	1	1	1
OG0002549	82508.K1VU23	3.49e-279	773	COG0438@1|root,KOG2941@2759|Eukaryota,38CDI@33154|Opisthokonta,3NTXV@4751|Fungi,3UZEW@5204|Basidiomycota,3VDB1@5234|Tremellales	4751|Fungi	O	Glycosyl transferases group 1	ALG1	GO:0000030,GO:0003674,GO:0003824,GO:0005575,GO:0005622,GO:0005623,GO:0005737,GO:0005783,GO:0006464,GO:0006486,GO:0006487,GO:0006488,GO:0006490,GO:0006629,GO:0006807,GO:0008150,GO:0008152,GO:0009058,GO:0009059,GO:0009100,GO:0009101,GO:0009987,GO:0012505,GO:0016740,GO:0016757,GO:0016758,GO:0019187,GO:0019538,GO:0034645,GO:0036211,GO:0043170,GO:0043226,GO:0043227,GO:0043229,GO:0043231,GO:0043412,GO:…	2.4.1.142	ko:K03842	ko00510,ko00513,ko01100,map00510,map00513,map01100	M00055	R05972	-	ko00000,ko00001,ko00002,ko01000,ko01003	-	GT33	-	Glyco_trans_1_4,Glyco_trans_4_4,Glyco_transf_4,Glycos_transf_1	IPR026051	Chitobiosyldiphosphodolichol beta-mannosyltransferase ALG1-like	1	0	0	0	0	1	0	1	1	1	2	1	1	1	1	2	2	1	1	1	1	1	1	1	1	1	1
OG0002601	5480.G8BIF6	0	900	COG0055@1|root,KOG1350@2759|Eukaryota,38CQ6@33154|Opisthokonta,3NVU5@4751|Fungi,3QPGY@4890|Ascomycota,3RRFU@4891|Saccharomycetes,47AD1@766764|Debaryomycetaceae	4751|Fungi	C	Produces ATP from ADP in the presence of a proton gradient across the membrane	ATP2	GO:0000166,GO:0000275,GO:0003674,GO:0003824,GO:0005215,GO:0005488,GO:0005575,GO:0005622,GO:0005623,GO:0005737,GO:0005739,GO:0005740,GO:0005743,GO:0005753,GO:0005754,GO:0006091,GO:0006119,GO:0006139,GO:0006163,GO:0006164,GO:0006725,GO:0006753,GO:0006754,GO:0006793,GO:0006796,GO:0006807,GO:0006810,GO:0006811,GO:0006812,GO:0006839,GO:0008150,GO:0008152,GO:0008324,GO:0009058,GO:0009117,GO:0009123,GO:…	2.4.1.18,3.6.3.14	ko:K00700,ko:K02133	ko00190,ko00500,ko01100,ko01110,ko04714,ko05010,ko05012,ko05016,map00190,map00500,map01100,map01110,map04714,map05010,map05012,map05016	M00158,M00565	R02110	-	ko00000,ko00001,ko00002,ko01000,ko04147	3.A.2.1	CBM48,GH13	-	ATP-synt_ab,ATP-synt_ab_N	IPR050053	ATPase alpha/beta chains	1	1	1	1	1	1	2	1	1	1	2	1	1	1	1	1	1	1	1	1	1	1	1	1	1	1	1
OG0002601	5480.G8BIF6	0	900	COG0055@1|root,KOG1350@2759|Eukaryota,38CQ6@33154|Opisthokonta,3NVU5@4751|Fungi,3QPGY@4890|Ascomycota,3RRFU@4891|Saccharomycetes,47AD1@766764|Debaryomycetaceae	4751|Fungi	C	Produces ATP from ADP in the presence of a proton gradient across the membrane	ATP2	GO:0000166,GO:0000275,GO:0003674,GO:0003824,GO:0005215,GO:0005488,GO:0005575,GO:0005622,GO:0005623,GO:0005737,GO:0005739,GO:0005740,GO:0005743,GO:0005753,GO:0005754,GO:0006091,GO:0006119,GO:0006139,GO:0006163,GO:0006164,GO:0006725,GO:0006753,GO:0006754,GO:0006793,GO:0006796,GO:0006807,GO:0006810,GO:0006811,GO:0006812,GO:0006839,GO:0008150,GO:0008152,GO:0008324,GO:0009058,GO:0009117,GO:0009123,GO:…	2.4.1.18,3.6.3.14	ko:K00700,ko:K02133	ko00190,ko00500,ko01100,ko01110,ko04714,ko05010,ko05012,ko05016,map00190,map00500,map01100,map01110,map04714,map05010,map05012,map05016	M00158,M00565	R02110	-	ko00000,ko00001,ko00002,ko01000,ko04147	3.A.2.1	CBM48,GH13	-	ATP-synt_ab,ATP-synt_ab_N	IPR005722	ATP synthase, F1 complex, beta subunit	1	1	1	1	1	1	2	1	1	1	2	1	1	1	1	1	1	1	1	1	1	1	1	1	1	1	1
OG0002601	5480.G8BIF6	0	900	COG0055@1|root,KOG1350@2759|Eukaryota,38CQ6@33154|Opisthokonta,3NVU5@4751|Fungi,3QPGY@4890|Ascomycota,3RRFU@4891|Saccharomycetes,47AD1@766764|Debaryomycetaceae	4751|Fungi	C	Produces ATP from ADP in the presence of a proton gradient across the membrane	ATP2	GO:0000166,GO:0000275,GO:0003674,GO:0003824,GO:0005215,GO:0005488,GO:0005575,GO:0005622,GO:0005623,GO:0005737,GO:0005739,GO:0005740,GO:0005743,GO:0005753,GO:0005754,GO:0006091,GO:0006119,GO:0006139,GO:0006163,GO:0006164,GO:0006725,GO:0006753,GO:0006754,GO:0006793,GO:0006796,GO:0006807,GO:0006810,GO:0006811,GO:0006812,GO:0006839,GO:0008150,GO:0008152,GO:0008324,GO:0009058,GO:0009117,GO:0009123,GO:…	2.4.1.18,3.6.3.14	ko:K00700,ko:K02133	ko00190,ko00500,ko01100,ko01110,ko04714,ko05010,ko05012,ko05016,map00190,map00500,map01100,map01110,map04714,map05010,map05012,map05016	M00158,M00565	R02110	-	ko00000,ko00001,ko00002,ko01000,ko04147	3.A.2.1	CBM48,GH13	-	ATP-synt_ab,ATP-synt_ab_N	IPR036121	ATPase, F1/V1/A1 complex, alpha/beta subunit, N-terminal domain superfamily	1	1	1	1	1	1	2	1	1	1	2	1	1	1	1	1	1	1	1	1	1	1	1	1	1	1	1
OG0002601	5480.G8BIF6	0	900	COG0055@1|root,KOG1350@2759|Eukaryota,38CQ6@33154|Opisthokonta,3NVU5@4751|Fungi,3QPGY@4890|Ascomycota,3RRFU@4891|Saccharomycetes,47AD1@766764|Debaryomycetaceae	4751|Fungi	C	Produces ATP from ADP in the presence of a proton gradient across the membrane	ATP2	GO:0000166,GO:0000275,GO:0003674,GO:0003824,GO:0005215,GO:0005488,GO:0005575,GO:0005622,GO:0005623,GO:0005737,GO:0005739,GO:0005740,GO:0005743,GO:0005753,GO:0005754,GO:0006091,GO:0006119,GO:0006139,GO:0006163,GO:0006164,GO:0006725,GO:0006753,GO:0006754,GO:0006793,GO:0006796,GO:0006807,GO:0006810,GO:0006811,GO:0006812,GO:0006839,GO:0008150,GO:0008152,GO:0008324,GO:0009058,GO:0009117,GO:0009123,GO:…	2.4.1.18,3.6.3.14	ko:K00700,ko:K02133	ko00190,ko00500,ko01100,ko01110,ko04714,ko05010,ko05012,ko05016,map00190,map00500,map01100,map01110,map04714,map05010,map05012,map05016	M00158,M00565	R02110	-	ko00000,ko00001,ko00002,ko01000,ko04147	3.A.2.1	CBM48,GH13	-	ATP-synt_ab,ATP-synt_ab_N	IPR027417	P-loop containing nucleoside triphosphate hydrolase	1	1	1	1	1	1	2	1	1	1	2	1	1	1	1	1	1	1	1	1	1	1	1	1	1	1	1
OG0002616	4932.YFR047C	1.01e-133	389	COG0157@1|root,KOG3008@2759|Eukaryota,38D18@33154|Opisthokonta,3NUQX@4751|Fungi,3QMBE@4890|Ascomycota,3RS6P@4891|Saccharomycetes,3S03H@4893|Saccharomycetaceae	4751|Fungi	H	Involved in the catabolism of quinolinic acid (QA)	BNA6	GO:0003674,GO:0003824,GO:0004514,GO:0005575,GO:0005622,GO:0005623,GO:0005634,GO:0005737,GO:0006082,GO:0006139,GO:0006520,GO:0006568,GO:0006576,GO:0006586,GO:0006725,GO:0006732,GO:0006733,GO:0006753,GO:0006793,GO:0006796,GO:0006807,GO:0008150,GO:0008152,GO:0009056,GO:0009058,GO:0009072,GO:0009108,GO:0009117,GO:0009165,GO:0009308,GO:0009435,GO:0009987,GO:0016054,GO:0016740,GO:0016757,GO:0016763,GO:…	2.4.2.19	ko:K00767	ko00760,ko01100,map00760,map01100	M00115	R03348	RC02877	ko00000,ko00001,ko00002,ko01000	-	-	-	QRPTase_C,QRPTase_N	IPR027277	Nicotinate-nucleotide pyrophosphorylase/Putative pyrophosphorylase ModD	1	1	1	1	1	1	1	1	1	1	2	1	2	1	1	2	2	0	0	0	1	0	1	1	1	1	1
OG0002616	4932.YFR047C	1.01e-133	389	COG0157@1|root,KOG3008@2759|Eukaryota,38D18@33154|Opisthokonta,3NUQX@4751|Fungi,3QMBE@4890|Ascomycota,3RS6P@4891|Saccharomycetes,3S03H@4893|Saccharomycetaceae	4751|Fungi	H	Involved in the catabolism of quinolinic acid (QA)	BNA6	GO:0003674,GO:0003824,GO:0004514,GO:0005575,GO:0005622,GO:0005623,GO:0005634,GO:0005737,GO:0006082,GO:0006139,GO:0006520,GO:0006568,GO:0006576,GO:0006586,GO:0006725,GO:0006732,GO:0006733,GO:0006753,GO:0006793,GO:0006796,GO:0006807,GO:0008150,GO:0008152,GO:0009056,GO:0009058,GO:0009072,GO:0009108,GO:0009117,GO:0009165,GO:0009308,GO:0009435,GO:0009987,GO:0016054,GO:0016740,GO:0016757,GO:0016763,GO:…	2.4.2.19	ko:K00767	ko00760,ko01100,map00760,map01100	M00115	R03348	RC02877	ko00000,ko00001,ko00002,ko01000	-	-	-	QRPTase_C,QRPTase_N	IPR036068	Nicotinate phosphoribosyltransferase-like, C-terminal	1	1	1	1	1	1	1	1	1	1	2	1	2	1	1	2	2	0	0	0	1	0	1	1	1	1	1
OG0002660	4909.A0A099P7L3	0	1563	KOG2431@1|root,KOG2431@2759|Eukaryota,38CSI@33154|Opisthokonta,3NUIH@4751|Fungi,3QJFQ@4890|Ascomycota,3RTPP@4891|Saccharomycetes	4751|Fungi	G	Belongs to the glycosyl hydrolase 47 family	MNS1	GO:0000139,GO:0003674,GO:0003824,GO:0004553,GO:0004559,GO:0004571,GO:0005488,GO:0005509,GO:0005575,GO:0005622,GO:0005623,GO:0005737,GO:0005783,GO:0005789,GO:0005794,GO:0006464,GO:0006491,GO:0006508,GO:0006511,GO:0006516,GO:0006517,GO:0006807,GO:0006950,GO:0008150,GO:0008152,GO:0009056,GO:0009057,GO:0009100,GO:0009987,GO:0010033,GO:0010243,GO:0010498,GO:0012505,GO:0015923,GO:0015924,GO:0016020,GO:…	3.2.1.113	ko:K01230	ko00510,ko00513,ko01100,ko04141,map00510,map00513,map01100,map04141	M00073,M00074	R05982,R06722	-	ko00000,ko00001,ko00002,ko01000,ko04131	-	GH47	-	Glyco_hydro_47	IPR050749	Glycosyl Hydrolase Family 47	0	1	1	1	1	1	1	1	1	1	2	1	2	0	0	1	0	1	1	0	1	1	1	1	1	1	1
OG0002660	4909.A0A099P7L3	0	1563	KOG2431@1|root,KOG2431@2759|Eukaryota,38CSI@33154|Opisthokonta,3NUIH@4751|Fungi,3QJFQ@4890|Ascomycota,3RTPP@4891|Saccharomycetes	4751|Fungi	G	Belongs to the glycosyl hydrolase 47 family	MNS1	GO:0000139,GO:0003674,GO:0003824,GO:0004553,GO:0004559,GO:0004571,GO:0005488,GO:0005509,GO:0005575,GO:0005622,GO:0005623,GO:0005737,GO:0005783,GO:0005789,GO:0005794,GO:0006464,GO:0006491,GO:0006508,GO:0006511,GO:0006516,GO:0006517,GO:0006807,GO:0006950,GO:0008150,GO:0008152,GO:0009056,GO:0009057,GO:0009100,GO:0009987,GO:0010033,GO:0010243,GO:0010498,GO:0012505,GO:0015923,GO:0015924,GO:0016020,GO:…	3.2.1.113	ko:K01230	ko00510,ko00513,ko01100,ko04141,map00510,map00513,map01100,map04141	M00073,M00074	R05982,R06722	-	ko00000,ko00001,ko00002,ko01000,ko04131	-	GH47	-	Glyco_hydro_47	IPR036026	Seven-hairpin glycosidases	0	1	1	1	1	1	1	1	1	1	2	1	2	0	0	1	0	1	1	0	1	1	1	1	1	1	1
OG0002689	82508.K1VPR0	0	1477	KOG1192@1|root,KOG1192@2759|Eukaryota,39TRF@33154|Opisthokonta,3NXVP@4751|Fungi,3UYRV@5204|Basidiomycota,3VDQM@5234|Tremellales	4751|Fungi	CG	Glycosyltransferase family 28 N-terminal domain	-	-	2.4.1.173	ko:K05841	-	-	-	-	ko00000,ko01000,ko01003	-	GT1	-	GRAM,Glyco_transf_28,UDPGT	IPR050426	Glycosyltransferase 28	2	1	1	1	1	1	1	1	1	1	2	1	1	0	0	0	0	0	0	0	0	0	1	1	1	1	1
OG0002782	82508.K1W4X6	0	1339	COG0058@1|root,KOG2099@2759|Eukaryota,38F0I@33154|Opisthokonta,3NVUR@4751|Fungi,3V38G@5204|Basidiomycota,3VDRI@5234|Tremellales	4751|Fungi	G	Phosphorylase is an important allosteric enzyme in carbohydrate metabolism. Enzymes from different sources differ in their regulatory mechanisms and in their natural substrates. However, all known phosphorylases share catalytic and structural properties	GPH1	GO:0000272,GO:0003674,GO:0003824,GO:0004645,GO:0005488,GO:0005575,GO:0005622,GO:0005623,GO:0005737,GO:0005975,GO:0005976,GO:0005977,GO:0005980,GO:0006073,GO:0006091,GO:0006112,GO:0008144,GO:0008150,GO:0008152,GO:0008184,GO:0009056,GO:0009057,GO:0009251,GO:0009987,GO:0015980,GO:0016052,GO:0016740,GO:0016757,GO:0016758,GO:0019842,GO:0030170,GO:0036094,GO:0043167,GO:0043168,GO:0043170,GO:0044042,GO:…	2.4.1.1	ko:K00688	ko00500,ko01100,ko01110,ko02026,ko04217,ko04910,ko04922,ko04931,map00500,map01100,map01110,map02026,map04217,map04910,map04922,map04931	-	R02111	-	ko00000,ko00001,ko01000	-	GT35	-	Phosphorylase	IPR000811	Glycosyl transferase, family 35	1	1	1	1	1	1	1	1	1	1	2	1	2	0	0	0	0	0	0	0	0	0	1	1	1	1	1
OG0002893	310453.XP_007581512.1	0	1896	COG0055@1|root,COG0296@1|root,KOG0470@2759|Eukaryota,KOG1350@2759|Eukaryota,38CQ6@33154|Opisthokonta,3NVU5@4751|Fungi,3QPGY@4890|Ascomycota	4751|Fungi	C	Produces ATP from ADP in the presence of a proton gradient across the membrane	ATP2	GO:0000166,GO:0000275,GO:0003674,GO:0003824,GO:0005215,GO:0005488,GO:0005575,GO:0005622,GO:0005623,GO:0005737,GO:0005739,GO:0005740,GO:0005743,GO:0005753,GO:0005754,GO:0006091,GO:0006119,GO:0006139,GO:0006163,GO:0006164,GO:0006725,GO:0006753,GO:0006754,GO:0006793,GO:0006796,GO:0006807,GO:0006810,GO:0006811,GO:0006812,GO:0006839,GO:0008150,GO:0008152,GO:0008324,GO:0009058,GO:0009117,GO:0009123,GO:…	2.4.1.18,3.6.3.14	ko:K00700,ko:K02133	ko00190,ko00500,ko01100,ko01110,ko04714,ko05010,ko05012,ko05016,map00190,map00500,map01100,map01110,map04714,map05010,map05012,map05016	M00158,M00565	R02110	-	ko00000,ko00001,ko00002,ko01000,ko04147	3.A.2.1	CBM48,GH13	-	ATP-synt_ab,ATP-synt_ab_N	IPR005722	ATP synthase, F1 complex, beta subunit	1	1	1	1	1	1	1	1	1	1	2	1	3	0	0	0	0	0	0	0	0	0	1	1	1	1	1
OG0002893	310453.XP_007581512.1	0	1896	COG0055@1|root,COG0296@1|root,KOG0470@2759|Eukaryota,KOG1350@2759|Eukaryota,38CQ6@33154|Opisthokonta,3NVU5@4751|Fungi,3QPGY@4890|Ascomycota	4751|Fungi	C	Produces ATP from ADP in the presence of a proton gradient across the membrane	ATP2	GO:0000166,GO:0000275,GO:0003674,GO:0003824,GO:0005215,GO:0005488,GO:0005575,GO:0005622,GO:0005623,GO:0005737,GO:0005739,GO:0005740,GO:0005743,GO:0005753,GO:0005754,GO:0006091,GO:0006119,GO:0006139,GO:0006163,GO:0006164,GO:0006725,GO:0006753,GO:0006754,GO:0006793,GO:0006796,GO:0006807,GO:0006810,GO:0006811,GO:0006812,GO:0006839,GO:0008150,GO:0008152,GO:0008324,GO:0009058,GO:0009117,GO:0009123,GO:…	2.4.1.18,3.6.3.14	ko:K00700,ko:K02133	ko00190,ko00500,ko01100,ko01110,ko04714,ko05010,ko05012,ko05016,map00190,map00500,map01100,map01110,map04714,map05010,map05012,map05016	M00158,M00565	R02110	-	ko00000,ko00001,ko00002,ko01000,ko04147	3.A.2.1	CBM48,GH13	-	ATP-synt_ab,ATP-synt_ab_N	IPR017853	Glycoside hydrolase superfamily	1	1	1	1	1	1	1	1	1	1	2	1	3	0	0	0	0	0	0	0	0	0	1	1	1	1	1
OG0002893	310453.XP_007581512.1	0	1896	COG0055@1|root,COG0296@1|root,KOG0470@2759|Eukaryota,KOG1350@2759|Eukaryota,38CQ6@33154|Opisthokonta,3NVU5@4751|Fungi,3QPGY@4890|Ascomycota	4751|Fungi	C	Produces ATP from ADP in the presence of a proton gradient across the membrane	ATP2	GO:0000166,GO:0000275,GO:0003674,GO:0003824,GO:0005215,GO:0005488,GO:0005575,GO:0005622,GO:0005623,GO:0005737,GO:0005739,GO:0005740,GO:0005743,GO:0005753,GO:0005754,GO:0006091,GO:0006119,GO:0006139,GO:0006163,GO:0006164,GO:0006725,GO:0006753,GO:0006754,GO:0006793,GO:0006796,GO:0006807,GO:0006810,GO:0006811,GO:0006812,GO:0006839,GO:0008150,GO:0008152,GO:0008324,GO:0009058,GO:0009117,GO:0009123,GO:…	2.4.1.18,3.6.3.14	ko:K00700,ko:K02133	ko00190,ko00500,ko01100,ko01110,ko04714,ko05010,ko05012,ko05016,map00190,map00500,map01100,map01110,map04714,map05010,map05012,map05016	M00158,M00565	R02110	-	ko00000,ko00001,ko00002,ko01000,ko04147	3.A.2.1	CBM48,GH13	-	ATP-synt_ab,ATP-synt_ab_N	IPR036121	ATPase, F1/V1/A1 complex, alpha/beta subunit, N-terminal domain superfamily	1	1	1	1	1	1	1	1	1	1	2	1	3	0	0	0	0	0	0	0	0	0	1	1	1	1	1
OG0002893	310453.XP_007581512.1	0	1896	COG0055@1|root,COG0296@1|root,KOG0470@2759|Eukaryota,KOG1350@2759|Eukaryota,38CQ6@33154|Opisthokonta,3NVU5@4751|Fungi,3QPGY@4890|Ascomycota	4751|Fungi	C	Produces ATP from ADP in the presence of a proton gradient across the membrane	ATP2	GO:0000166,GO:0000275,GO:0003674,GO:0003824,GO:0005215,GO:0005488,GO:0005575,GO:0005622,GO:0005623,GO:0005737,GO:0005739,GO:0005740,GO:0005743,GO:0005753,GO:0005754,GO:0006091,GO:0006119,GO:0006139,GO:0006163,GO:0006164,GO:0006725,GO:0006753,GO:0006754,GO:0006793,GO:0006796,GO:0006807,GO:0006810,GO:0006811,GO:0006812,GO:0006839,GO:0008150,GO:0008152,GO:0008324,GO:0009058,GO:0009117,GO:0009123,GO:…	2.4.1.18,3.6.3.14	ko:K00700,ko:K02133	ko00190,ko00500,ko01100,ko01110,ko04714,ko05010,ko05012,ko05016,map00190,map00500,map01100,map01110,map04714,map05010,map05012,map05016	M00158,M00565	R02110	-	ko00000,ko00001,ko00002,ko01000,ko04147	3.A.2.1	CBM48,GH13	-	ATP-synt_ab,ATP-synt_ab_N	IPR014756	Immunoglobulin E-set	1	1	1	1	1	1	1	1	1	1	2	1	3	0	0	0	0	0	0	0	0	0	1	1	1	1	1
OG0002893	310453.XP_007581512.1	0	1896	COG0055@1|root,COG0296@1|root,KOG0470@2759|Eukaryota,KOG1350@2759|Eukaryota,38CQ6@33154|Opisthokonta,3NVU5@4751|Fungi,3QPGY@4890|Ascomycota	4751|Fungi	C	Produces ATP from ADP in the presence of a proton gradient across the membrane	ATP2	GO:0000166,GO:0000275,GO:0003674,GO:0003824,GO:0005215,GO:0005488,GO:0005575,GO:0005622,GO:0005623,GO:0005737,GO:0005739,GO:0005740,GO:0005743,GO:0005753,GO:0005754,GO:0006091,GO:0006119,GO:0006139,GO:0006163,GO:0006164,GO:0006725,GO:0006753,GO:0006754,GO:0006793,GO:0006796,GO:0006807,GO:0006810,GO:0006811,GO:0006812,GO:0006839,GO:0008150,GO:0008152,GO:0008324,GO:0009058,GO:0009117,GO:0009123,GO:…	2.4.1.18,3.6.3.14	ko:K00700,ko:K02133	ko00190,ko00500,ko01100,ko01110,ko04714,ko05010,ko05012,ko05016,map00190,map00500,map01100,map01110,map04714,map05010,map05012,map05016	M00158,M00565	R02110	-	ko00000,ko00001,ko00002,ko01000,ko04147	3.A.2.1	CBM48,GH13	-	ATP-synt_ab,ATP-synt_ab_N	IPR027417	P-loop containing nucleoside triphosphate hydrolase	1	1	1	1	1	1	1	1	1	1	2	1	3	0	0	0	0	0	0	0	0	0	1	1	1	1	1
OG0002991	5551.XP_003237482.1	0	1083	KOG4748@1|root,KOG4748@2759|Eukaryota,38I0I@33154|Opisthokonta,3NXHI@4751|Fungi,3QJXW@4890|Ascomycota,20BDR@147545|Eurotiomycetes,3B0DI@33183|Onygenales,3FTSP@34384|Arthrodermataceae	4751|Fungi	GM	galactosyl transferase GMA12/MNN10 family	MNN10	GO:0000009,GO:0000030,GO:0000032,GO:0000136,GO:0000137,GO:0000139,GO:0000278,GO:0000281,GO:0000910,GO:0000917,GO:0003674,GO:0003824,GO:0005575,GO:0005622,GO:0005623,GO:0005737,GO:0005783,GO:0005794,GO:0005795,GO:0006056,GO:0006057,GO:0006464,GO:0006486,GO:0006487,GO:0006807,GO:0007049,GO:0008150,GO:0008152,GO:0008378,GO:0009058,GO:0009059,GO:0009100,GO:0009101,GO:0009272,GO:0009987,GO:0012505,GO:…	-	ko:K05531	ko00513,ko01100,map00513,map01100	M00074	-	-	ko00000,ko00001,ko00002,ko01000	-	GT34	-	Glyco_transf_34	IPR008630	Glycosyltransferase 34	0	1	1	1	1	1	1	1	2	1	3	1	0	0	0	0	0	0	0	0	0	0	1	1	1	1	2
OG0003039	5551.XP_003233463.1	5.15e-203	566	COG0005@1|root,KOG3984@2759|Eukaryota,38BI3@33154|Opisthokonta,3NYZ0@4751|Fungi,3QN38@4890|Ascomycota,20FG4@147545|Eurotiomycetes,3B0VY@33183|Onygenales,3FWGA@34384|Arthrodermataceae	4751|Fungi	F	Phosphorylase superfamily	PNP1	GO:0003674,GO:0003824,GO:0004731,GO:0005575,GO:0005622,GO:0005623,GO:0006139,GO:0006148,GO:0006152,GO:0006725,GO:0006732,GO:0006733,GO:0006753,GO:0006793,GO:0006796,GO:0006807,GO:0008150,GO:0008152,GO:0008477,GO:0008617,GO:0009056,GO:0009058,GO:0009108,GO:0009116,GO:0009117,GO:0009119,GO:0009164,GO:0009165,GO:0009435,GO:0009987,GO:0016740,GO:0016757,GO:0016763,GO:0016787,GO:0016798,GO:0016799,GO:…	2.4.2.1	ko:K03783	ko00230,ko00240,ko00760,ko01100,ko01110,map00230,map00240,map00760,map01100,map01110	-	R01561,R01863,R01969,R02147,R02294,R02295,R02297,R02484,R02557,R02748,R08368,R10244	RC00033,RC00063,RC00122	ko00000,ko00001,ko01000	-	-	-	PNP_UDP_1	IPR035994	Nucleoside phosphorylase superfamily	1	1	1	1	1	1	1	1	1	1	2	1	2	0	0	0	0	0	0	0	0	0	1	1	1	1	1
OG0003039	5551.XP_003233463.1	5.15e-203	566	COG0005@1|root,KOG3984@2759|Eukaryota,38BI3@33154|Opisthokonta,3NYZ0@4751|Fungi,3QN38@4890|Ascomycota,20FG4@147545|Eurotiomycetes,3B0VY@33183|Onygenales,3FWGA@34384|Arthrodermataceae	4751|Fungi	F	Phosphorylase superfamily	PNP1	GO:0003674,GO:0003824,GO:0004731,GO:0005575,GO:0005622,GO:0005623,GO:0006139,GO:0006148,GO:0006152,GO:0006725,GO:0006732,GO:0006733,GO:0006753,GO:0006793,GO:0006796,GO:0006807,GO:0008150,GO:0008152,GO:0008477,GO:0008617,GO:0009056,GO:0009058,GO:0009108,GO:0009116,GO:0009117,GO:0009119,GO:0009164,GO:0009165,GO:0009435,GO:0009987,GO:0016740,GO:0016757,GO:0016763,GO:0016787,GO:0016798,GO:0016799,GO:…	2.4.2.1	ko:K03783	ko00230,ko00240,ko00760,ko01100,ko01110,map00230,map00240,map00760,map01100,map01110	-	R01561,R01863,R01969,R02147,R02294,R02295,R02297,R02484,R02557,R02748,R08368,R10244	RC00033,RC00063,RC00122	ko00000,ko00001,ko01000	-	-	-	PNP_UDP_1	IPR011268	Purine nucleoside phosphorylase	1	1	1	1	1	1	1	1	1	1	2	1	2	0	0	0	0	0	0	0	0	0	1	1	1	1	1
OG0003064	5480.G8BJG1	0	1105	KOG2576@1|root,KOG2576@2759|Eukaryota,38DJ6@33154|Opisthokonta,3NTZF@4751|Fungi,3QJZ4@4890|Ascomycota,3RRN7@4891|Saccharomycetes,479JP@766764|Debaryomycetaceae	4751|Fungi	G	Belongs to the ALG6 ALG8 glucosyltransferase family	ALG8	GO:0003674,GO:0003824,GO:0005575,GO:0005622,GO:0005623,GO:0005737,GO:0005783,GO:0005789,GO:0006464,GO:0006486,GO:0006487,GO:0006490,GO:0006629,GO:0006807,GO:0008150,GO:0008152,GO:0009058,GO:0009059,GO:0009100,GO:0009101,GO:0009987,GO:0012505,GO:0016020,GO:0016021,GO:0016740,GO:0016757,GO:0016758,GO:0019538,GO:0031224,GO:0031984,GO:0034645,GO:0036211,GO:0042175,GO:0042281,GO:0042283,GO:0043170,GO:…	2.4.1.265	ko:K03849	ko00510,ko01100,map00510,map01100	M00055	R06263	-	ko00000,ko00001,ko00002,ko01000,ko01003	-	GT57	-	Alg6_Alg8	IPR004856	Glycosyl transferase, ALG6/ALG8	1	1	0	0	1	1	1	1	1	1	0	1	1	1	1	1	1	1	1	1	1	1	1	1	1	1	1
OG0003108	63418.F2Q5S0	0	2057	KOG2429@1|root,KOG2429@2759|Eukaryota,38CUF@33154|Opisthokonta,3NU24@4751|Fungi,3QJIA@4890|Ascomycota,20DI3@147545|Eurotiomycetes,3B2GH@33183|Onygenales,3FSMA@34384|Arthrodermataceae	4751|Fungi	G	Belongs to the glycosyl hydrolase 47 family	-	GO:0000139,GO:0003674,GO:0003824,GO:0004553,GO:0004559,GO:0004571,GO:0005488,GO:0005575,GO:0005622,GO:0005623,GO:0005737,GO:0005783,GO:0005788,GO:0005794,GO:0006464,GO:0006491,GO:0006508,GO:0006511,GO:0006516,GO:0006517,GO:0006807,GO:0006950,GO:0008150,GO:0008152,GO:0009056,GO:0009057,GO:0009100,GO:0009987,GO:0010033,GO:0010243,GO:0010498,GO:0012505,GO:0015923,GO:0015924,GO:0016020,GO:0016787,GO:…	3.2.1.24	ko:K01191,ko:K10084	ko00511,ko04141,map00511,map04141	-	-	-	ko00000,ko00001,ko01000,ko04091,ko04131	-	GH38	-	Glyco_hydro_47,PA	IPR036026	Seven-hairpin glycosidases	1	1	1	1	1	1	1	1	1	1	1	1	0	0	0	0	0	0	0	0	0	0	1	1	1	1	1
OG0003108	63418.F2Q5S0	0	2057	KOG2429@1|root,KOG2429@2759|Eukaryota,38CUF@33154|Opisthokonta,3NU24@4751|Fungi,3QJIA@4890|Ascomycota,20DI3@147545|Eurotiomycetes,3B2GH@33183|Onygenales,3FSMA@34384|Arthrodermataceae	4751|Fungi	G	Belongs to the glycosyl hydrolase 47 family	-	GO:0000139,GO:0003674,GO:0003824,GO:0004553,GO:0004559,GO:0004571,GO:0005488,GO:0005575,GO:0005622,GO:0005623,GO:0005737,GO:0005783,GO:0005788,GO:0005794,GO:0006464,GO:0006491,GO:0006508,GO:0006511,GO:0006516,GO:0006517,GO:0006807,GO:0006950,GO:0008150,GO:0008152,GO:0009056,GO:0009057,GO:0009100,GO:0009987,GO:0010033,GO:0010243,GO:0010498,GO:0012505,GO:0015923,GO:0015924,GO:0016020,GO:0016787,GO:…	3.2.1.24	ko:K01191,ko:K10084	ko00511,ko04141,map00511,map04141	-	-	-	ko00000,ko00001,ko01000,ko04091,ko04131	-	GH38	-	Glyco_hydro_47,PA	IPR044674	ER degradation-enhancing alpha-mannosidase-like protein 1/2/3	1	1	1	1	1	1	1	1	1	1	1	1	0	0	0	0	0	0	0	0	0	0	1	1	1	1	1
OG0003151	430998.XP_007671910.1	5.19e-169	491	COG5309@1|root,2QQE6@2759|Eukaryota,38HGU@33154|Opisthokonta,3NW21@4751|Fungi,3QNSF@4890|Ascomycota,1ZYPI@147541|Dothideomycetes,3MHR0@451867|Dothideomycetidae	4751|Fungi	G	Belongs to the glycosyl hydrolase 17 family	BGL2	GO:0000322,GO:0000323,GO:0000324,GO:0003674,GO:0003824,GO:0004338,GO:0004553,GO:0005575,GO:0005576,GO:0005618,GO:0005622,GO:0005623,GO:0005737,GO:0005773,GO:0005975,GO:0005976,GO:0006073,GO:0008150,GO:0008152,GO:0008422,GO:0009272,GO:0009277,GO:0009405,GO:0009986,GO:0009987,GO:0010383,GO:0015926,GO:0016043,GO:0016740,GO:0016787,GO:0016798,GO:0022610,GO:0030312,GO:0030445,GO:0031505,GO:0034406,GO:…	3.2.1.58	ko:K01210	ko00500,map00500	-	R00308,R03115	RC00467	ko00000,ko00001,ko01000	-	-	-	Glyco_hydro_17	IPR050732	Beta-glucan modifying enzymes	0	1	1	1	1	1	1	1	0	1	5	3	3	0	0	0	0	0	0	0	0	0	1	1	1	1	1
OG0003151	430998.XP_007671910.1	5.19e-169	491	COG5309@1|root,2QQE6@2759|Eukaryota,38HGU@33154|Opisthokonta,3NW21@4751|Fungi,3QNSF@4890|Ascomycota,1ZYPI@147541|Dothideomycetes,3MHR0@451867|Dothideomycetidae	4751|Fungi	G	Belongs to the glycosyl hydrolase 17 family	BGL2	GO:0000322,GO:0000323,GO:0000324,GO:0003674,GO:0003824,GO:0004338,GO:0004553,GO:0005575,GO:0005576,GO:0005618,GO:0005622,GO:0005623,GO:0005737,GO:0005773,GO:0005975,GO:0005976,GO:0006073,GO:0008150,GO:0008152,GO:0008422,GO:0009272,GO:0009277,GO:0009405,GO:0009986,GO:0009987,GO:0010383,GO:0015926,GO:0016043,GO:0016740,GO:0016787,GO:0016798,GO:0022610,GO:0030312,GO:0030445,GO:0031505,GO:0034406,GO:…	3.2.1.58	ko:K01210	ko00500,map00500	-	R00308,R03115	RC00467	ko00000,ko00001,ko01000	-	-	-	Glyco_hydro_17	IPR017853	Glycoside hydrolase superfamily	0	1	1	1	1	1	1	1	0	1	5	3	3	0	0	0	0	0	0	0	0	0	1	1	1	1	1
OG0003151	430998.XP_007671910.1	5.19e-169	491	COG5309@1|root,2QQE6@2759|Eukaryota,38HGU@33154|Opisthokonta,3NW21@4751|Fungi,3QNSF@4890|Ascomycota,1ZYPI@147541|Dothideomycetes,3MHR0@451867|Dothideomycetidae	4751|Fungi	G	Belongs to the glycosyl hydrolase 17 family	BGL2	GO:0000322,GO:0000323,GO:0000324,GO:0003674,GO:0003824,GO:0004338,GO:0004553,GO:0005575,GO:0005576,GO:0005618,GO:0005622,GO:0005623,GO:0005737,GO:0005773,GO:0005975,GO:0005976,GO:0006073,GO:0008150,GO:0008152,GO:0008422,GO:0009272,GO:0009277,GO:0009405,GO:0009986,GO:0009987,GO:0010383,GO:0015926,GO:0016043,GO:0016740,GO:0016787,GO:0016798,GO:0022610,GO:0030312,GO:0030445,GO:0031505,GO:0034406,GO:…	3.2.1.58	ko:K01210	ko00500,map00500	-	R00308,R03115	RC00467	ko00000,ko00001,ko01000	-	-	-	Glyco_hydro_17	IPR023395	Mitochondrial carrier domain superfamily	0	1	1	1	1	1	1	1	0	1	5	3	3	0	0	0	0	0	0	0	0	0	1	1	1	1	1
[truncated: 249 more rows]
[truncated: 30 more columns]

## Sheet: Supplementary table - 4 Lipid m
Orthogroup	seed ortholog	evalue	score	eggNOG OGs	max annot lvl	COG category	Description	Preferred name	GOs	EC	KEGG ko	KEGG Pathway	KEGG Module	KEGG Reaction	KEGG rclass	BRITE	KEGG TC	CAZy	BiGG Reaction	PFAMs	IPR term	IPR description	Blastocladiella emersonii 22665	Candida dubliniensis 11945	Candida dubliniensis 2747	Candida dubliniensis 8501	Candida parapsilosis 11301	Candida parapsilosis 1954	Candida tropicalis 94	Epidermophyton floccosum 100148	Epidermophyton floccosum 10867	Epidermophyton floccosum 130802	Hortaea werneckii 100455	Hortaea werneckii 1163	Hortaea werneckii 41051	Malassezia furfur 14140-1	Malassezia furfur 14140-2	Malassezia furfur 1878	Malassezia furfur 6000	Malassezia globosa 7705	Malassezia globosa 7886	Malassezia globosa 8744	Malassezia restricta 7877	Malassezia restricta 7991	Microsporum audouinii 119449	Microsporum audouinii 33268	Microsporum canis 113480	Microsporum canis 15669	Microsporum canis 44551
[truncated: 49 more rows]
[truncated: 30 more columns]

[truncated: 1 more sheets: Supplementary table 5 - Adhesin]
